# Supplementary material for: Major human schistosome species express different glycans with immunological and diagnostic implications.
Source: Research Square preprint supplement (doi:10.21203/rs.3.rs-7103573/v1), 2025-07-30
Supplement: Supplementary file 1 [file 1b8759408b7d41304ee0b36e.xlsx]

## Sheet: Cercariae
S. haematobium cercariae - O-glycans
Th. m/z1	Composition2	Proposed structure3	MALDI-TOF-MS/MS4
738.389	H2N1		S7.A
942.488	H3N1		S7.A
983.515	H2N2		S7.A
1157.6	F1H2N2		S7.A
1187.61	H3N2		S7.A
1361.7	F1H3N2		S7.A
1391.71	H4N2		S7.A
1565.8	F1H4N2		S7.A
1720.9	F4H1N3		S7.A
2907.42	F8H1N5		S7.A
(1) Th. m/z		Theoretical m/z of the reduced, permethylated glycan in positive ion mode [M+Na]+
(2) Composition		Determined glycan composition: H = Hexose, N= N-acetylhexosamine, F = Fucose.
(3) Proposed structure		based on structural characterization performed using MALDI-TOF-MS/MS (column D) and information from litterature
		Structures are represented using the CFG nomenclature:
(4) MALDI-TOF-MS/MS		Figure in which MALDI-TOF-MS/MS analysis of the ion species is displayed, when applicable

## Sheet: Eggs
S. haematobium eggs - O-glycans
Th. m/z1	Composition2	Proposed structure3	MALDI-TOF-MS/MS4
942.488	H3N1		-
983.515	H2N2		-
1024.54	H1N3		S7.B
1157.6	F1H2N2		S7.B
1187.61	H3N2		-
1198.63	F1H1N3		S7.B
1606.83	F1H3N3		-
1764.89	ND*		-
1780.92	F2H3N3		S7.B
1821.95	F2H2N4		-
2404.24	F3H4N4		S7.B
2445.26	F3H3N5		-
(1) Th. m/z		Theoretical m/z of the reduced, permethylated glycan in positive ion mode [M+Na]+
(2) Composition		Determined glycan composition: H = Hexose, N= N-acetylhexosamine, F = Fucose.
(3) Proposed structure		based on structural characterization performed using MALDI-TOF-MS/MS (column D) and information from litterature
		Structures are represented using the CFG nomenclature:
(4) MALDI-TOF-MS/MS		Figure in which MALDI-TOF-MS/MS analysis of the ion species is displayed, when applicable
