# Supplementary material for: Major human schistosome species express different glycans with immunological and diagnostic implications.
Source: Research Square preprint supplement (doi:10.21203/rs.3.rs-7103573/v1), 2025-07-30
Supplement: Supplementary file 2 [file 1c3a3ad304f5e70d4f1ffb6e.xlsx]

## Sheet: Sh cercariae
S. haematobium cercariae - GSL glycans
Th. m/z1	Composition2	Proposed structure3	HF4				Digestion5					In Figure6	MALDI-TOF-MS/MS7
			Treatment product composition	Exp m/z			Exoglycosidase	Treatment product composition	Exp m/z
				Untreat.	+HF	Δm/z			Undig.	+Enzyme	Δm/z
989.347	H4N1-AA		NS				β1-4 galactosidase	H3N1-AA	989.2	-	-	Fig S2-A	-
1135.4	H4N1F1-AA		H4N1-AA	1135.27	989.155	146.119	NS					Fig S2-A	Fig S3-A
1151.4	H5N1-AA		NS				β1-4 galactosidase	H4N1-AA	1151.26	989.216	162.047	Fig S2-A	Fig S3-A
1176.43	H3N2F1-AA		H3N2-AA	1176.29	1030.18	146.118	NS					Fig S2-A	Fig S3-A
1322.49	H3N2F2-AA		H3N2-AA	1322.34	1030.18	292.163	NS					Fig S2-A	Fig S3-A
1468.55	H3N2F3-AA		H3N2-AA	1468.36	1030.18	438.188	NS					Fig S2-A	Fig S3-A
1516.53	H5N2-AA		NS				β1-4 galactosidase	H4N2-AA	1516.34	1354.33	162.008	Fig S2-A	Fig S3-A
1614.6	H3N2F4-AA		H3N2-AA	1614.4	1030.18	584.229	NS					Fig S2-A	Fig S3-A
1646.59	H5N2F2-AA		H5N2-AA	1646.38	1354.21	292.17	NS					Fig S2-A	Fig S3-A
1678.58	H7N2-AA		NS				β1-4 galactosidase	H5N2-AA	1678.37	1516.37	162	Fig S2-A	Fig S3-A
1760.66	H3N2F5-AA		H3N2-AA	1760.44	1030.18	730.265	NS					Fig S2-A	Fig S3-A
1963.74	H3N3F5-AA		H3N3-AA	1963.5	1233.21	730.295	NS					Fig S2-A	Fig S3-A
2166.82	H3N4F5-AA		H3N4-AA	2166.57	1436.24	730.327	NS					Fig S2-A	Fig S3-A
2312.88	H3N4F6-AA		H3N4-AA	2312.62	1436.24	876.379	NS					Fig S2-A	Fig S3-A
2515.96	H3N5F6-AA		H3N5-AA	2515.68	1639.28	876.405	NS					Fig S2-A	-
(1) Th. m/z	Theoretical m/z of the AA-labeled glycan in negative ion mode [M-H]-
(2) Composition	Determined glycan composition: AA= AA label, H = Hexose, N= N-acetylhexosamine, F = Fucose
(3) Proposed structure	based on structural characterization performed using MALDI-TOF-MS/MS and glycan sequencing techniques
	Structures are represented using the CFG nomenclature:
(4) HF	Treatment with hydrofluoric acid, structural changes resulting from the treatment and corresponding experimental (exp.) m/z are detailed - NS = Not sensitive to treatment
(5) Digestion	Treatment with specified exoglycosidases, structural changes resulting from the treatment and corresponding experimental (exp.) m/z are detailed - NS = not sensitive to treatment
(6) In figure	Figure showing experimental data corresponding to HF and exoglycosidase treatments
(7) MALDI-TOF-MS/MS	Figure in which MALDI-TOF-MS/MS analysis of the ion species is displayed, when applicable

## Sheet: Sh worms
S. haematobium adult worms - GSL glycans
Th. m/z1	Composition2	Proposed structure3	HF4				Digestion5					In Figure6	MALDI-TOF-MS/MS7	PGC-nano-LC-MS/MS8
			Treatment product composition	Exp m/z			Exoglycosidase	Treatment product composition	Exp m/z
				Untreat.	+HF	Δm/z			Undig.	+Enzyme	Δm/z
989.347	H4N1-AA		NS				β1-4 galactosidase + β-HexNAcase	H3-AA	989.287	-	-	Fig S2-B	-	-
1030.37	H3N2-AA		NS				β-HexNAcase	H3-AA	1030.32	-	-	Fig S2-B	-	-
1058.33	ND		NS				NS					Fig S2-B	-	-
1076.37	ND		Sensitive				NS					Fig S2-B	-	-
1135.37	H4N1F1-AA		H4N1-AA	1134.35	989.444	144.905	NS					Fig S2-B	-	-
1176.43	H3N2F1-AA		H3N2-AA	1176.39	1030.47	145.914	NS					Fig S2-B	Fig S3-B	-
1192.43	H4N2-AA		NS				β1-4 galactosidase + β-HexNAcase	H3-AA	1192.38	-	-	Fig S2-B	-	-
1206.41	H3N2A1-AA		NS				β-Glucuronidase	H3N2-AA	1206.91	1030.76	176.15	Fig S2-B	-	Fig S4-B1
1322.49	H3N2F2-AA		H3N2-AA	1322.46	1030.47	291.991	NS					Fig S2-B	Fig S3-B	-
1354.48	H5N2-AA		NS				β1-4 galactosidase + β-HexNAcase	H3-AA	1354.45	-	-	Fig S2-B	Fig S3-B	-
1441.5	ND		Sensitive									Fig S2-B	-	-
1468.55	H3N2F3-AA		H3N2-AA	1468.53	1030.47	438.055	NS					Fig S2-B	Fig S3-B	-
1500.54	H5N2F1-AA		H5N2-AA	1500.52	1354.58	145.94	β1-4 galactosidase + β-HexNAcase	H4N1F1-AA	1500.52	1134.37	366.15	Fig S2-B	Fig S3-B	-
1612.56	H3N4A1-AA		NS				β-Glucuronidase	H3N4-AA	1613.24	1437.07	176.17	Fig S2-B	-	Fig S4-B2
1646.59	H5N2F2-AA		H5N2-AA	1646.59	1354.58	292.01	NS					Fig S2-B	-	-
1719.61	H6N3-AA		NS				NS	H3-AA	1719.61	-	-	Fig S2-B	-	-
(1) Th. m/z	Theoretical m/z of the AA-labeled glycan in negative ion mode [M-H]-
(2) Composition	Determined glycan composition: AA= AA label, H = Hexose, N= N-acetylhexosamine, A = Hexuronic acid, F = Fucose. ND = Non determined
(3) Proposed structure	based on structural characterization performed using MALDI-TOF-MS/MS and glycan sequencing techniques
	Structures are represented using the CFG nomenclature:
(4) HF	Treatment with hydrofluoric acid, structural changes resulting from the treatment and corresponding experimental (exp.) m/z are detailed - NS = Not sensitive to treatment
(5) Digestion	Treatment with specified exoglycosidases, structural changes resulting from the treatment and corresponding experimental (exp.) m/z are detailed - NS = not sensitive to treatment
(6) In figure	Figure showing experimental data corresponding to HF and exoglycosidase treatments
(7) MALDI-TOF-MS/MS	Figure in which MALDI-TOF-MS/MS analysis of the ion species is displayed, when applicable
(8) PGC-nano-LC-MS/MS	Figure in which PGC-nano-LC-MS/MS analysis of the ion species is displayed, when applicable

## Sheet: Sh eggs
S. haematobium eggs - GSL glycans
Ref0	Th. m/z1	Composition2	Proposed structure3	HF4				Digestion5					In Figure6	MALDI-TOF-MS/MS7	PGC-nano-LC-MS/MS8
				Treatment product composition	Exp m/z			Exoglycosidase	Treatment product composition	Exp m/z
					Untreat.	+HF	Δm/z			Undig.	+Enzyme	Δm/z
N-1	1030.37	H3N2-AA		NS				β-HexNAcase	H3-AA	1030.26	-	-	Fig S2-C	-	Fig. S4-D1
N-2	1176.43	H3N2F1-AA		H3N2-AA	1176.31	1030.29	146.021	Partial β-HexNAcase	H3N3F1-AA	1176.31	973.268	203.046	Fig S2-C	-	Fig. S4-D2 a-b 2 isomeric structures
N-3	1436.53	H3N4-AA		NS				β-HexNAcase	H3-AA	1436.39	-	-	Fig S2-C	-	Fig. S4-D3
N-4 T-1	1582.59	H3N4F1-AA		H3N4-AA	1582.44	1436.43	146.002	β-HexNAcase	H3N1F1 H3N3F1-AA	1582.44	973.259 1379.426	609.178 203.011	Fig S2-C	-	Fig. S4-D4 a-b 2 isomeric structures
A-1 T-2	1612.56	H3N4A1-AA		NS				β-HexNAcase	H3N3A1-AA	1612.41	1409.39	203.014	Fig S2-C	-	-
N-5	1785.67	H3N5F1-AA		H3N5-AA	1785.5	1639.5	145.999	β-HexNAcase	H3N4F1-AA	1785.5	1582.49	203.014	Fig S2-C	-	-
A-2 T-3	1815.64	H3N5A1-AA		NS				β-HexNAcase	H3N4A1-AA	1815.48	1612.46	203.017	Fig S2-C	Fig S3-C	-
N-6	1849.67	H5N3F2-AA		H5N3-AA	1849.51	1557.46	292.048	β-HexNAcase	H5N2F2-AA	1849.51	1646.48	203.021	Fig S2-C	-	Fig. S4-D5
N-7 T-4	1931.73	H3N5F2-AA		H3N5-AA	1931.55	1639.5	292.05	β-HexNAcase	H3N2F2-AA	1931.55	1322.41	609.146	Fig S2-C	-	Fig. S4-D6
A-3 T-5	1961.7	H3N5A1F1-AA		H3N5A1-AA	1961.53	1815.53	146.002	β-HexNAcase	H3N4A1F1-AA	1961.53	1758.51	203.02	Fig S2-C	Fig S3-C	Fig. S4-C1
A-4 T-6	2018.72	H3N6A1-AA		NS				β-HexNAcase	H3N5A1-AA	2018.55	1815.53	203.019	Fig S2-C	Fig S3-C	Fig. S4-C2
N-8 T-7	2134.81	H3N6F2-AA		H3N6-AA	2134.63	1842.57	292.056	β-HexNAcase	H3N3F2-AA	2134.63	1525.47	609.158	Fig S2-C	Fig S3-C	-
A-5 T-8	2164.78	H3N6A1F1-AA		H3N6A1-AA	2164.61	2018.61	146	β-HexNAcase	H3N5A1F1-AA	2164.61	1961.59	203.017	Fig S2-C	-	Fig. S4-C3
A-6 T-9	2221.8	H3N7A1-AA		NS				β-HexNAcase	H3N6A1-AA	2221.63	2018.61	203.016	Fig S2-C	Fig S3-C	Fig. S4-C4
N-9 T-10	2280.86	H3N6F3-AA		H3N6-AA	2280.68	1842.57	438.11	β-HexNAcase	H3N3F3-AA	2280.68	1671.52	609.163	Fig S2-C	Fig S3-C	-
A-7 T-11	2310.84	H3N6A1F2-AA		H3N6A1-AA	2310.66	2018.61	292.052	β-HexNAcase	H3N5A1F2-AA	2310.66	2107.65	203.013	Fig S2-C	Fig S3-C	Fig. S4-C5
A-8 T-12	2368.86	H3N7A1F1-AA		H3N7A1-AA	2367.69	2221.7	145.99	β-HexNAcase	H3N5A1F1-AA	2367.69	2164.68	203.011	Fig S2-C	-	Fig. S4-C6
N-10 T-13	2483.94	H3N7F3-AA		H3N7-AA	2483.76	2045.65	438.102	β-HexNAcase	H3N4F3-AA	2483.76	1874.6	609.157	Fig S2-C	Fig S3-C	-
A-9 T-14	2513.92	H3N7A1F2-AA		H3N7A1-AA	2513.74	2221.7	292.045	β-HexNAcase	H3N6A1F2-AA	2513.74	2310.73	203.009	Fig S2-C	Fig S3-C	Fig. S4-C7
A-10 T-15	2659.98	H3N7A1F3-AA		H3N7A1-AA	2659.79	2221.7	438.093	β-HexNAcase	H3N6A1F3-AA	2659.79	2456.79	203.004	Fig S2-C	Fig S3-C	Fig. S4-C8
(0) Ref		Reference assigned to corresponding ion species.
		T = indicates that ion yields one of the 15 most major signals in the total MALDI-TOF-MS profile
		A = indicates that ion yields one of the 10 major signals in the MALDI-TOF-MS profile of the acidic fraction of the egg GSL glycans
		N = indicates that ion yields one of the 10 major signals in the MALDI-TOF-MS profile of the neutral fraction of the egg GSL glycans
(1) Th. m/z		Theoretical m/z of the AA-labeled glycan in negative ion mode [M-H]-
(2) Composition		Determined glycan composition: AA= AA label, H = Hexose, N= N-acetylhexosamine, A = Hexuronic acid, F = Fucose
(3) Proposed structure		based on structural characterization performed using MALDI-TOF-MS/MS, glycan sequencing techniques and PGC-nano-LC-MS/MS. GlcA has been found linked to either GlcNAc or GalNAc. Based on analogy with S. mansoni, HexNAcs in the GSL glycan backbone are presumed to be GlcNAc.
		Structures are represented using the CFG nomenclature:
(4) HF		Treatment with hydrofluoric acid, structural changes resulting from the treatment and corresponding experimental (exp.) m/z are detailed - NS = Not sensitive to treatment
(5) Digestion		Treatment with specified exoglycosidases, structural changes resulting from the treatment and corresponding experimental (exp.) m/z are detailed - NS = not sensitive to treatment
(6) In figure		Figure showing experimental data corresponding to HF and exoglycosidase treatments
(7) MALDI-TOF-MS/MS		Figure in which MALDI-TOF-MS/MS analysis of the ion species is displayed, when applicable
(8) PGC-nano-LC-MS/MS		Figure in which PGC-nano-LC-MS/MS analysis of the ion species is displayed, when applicable

## Sheet: Sm eggs
S. mansoni eggs - GSL glycans
Ref0	Th. m/z1	Composition2	Proposed structure3	HF4				Digestion5					In Figure6	MALDI-TOF-MS/MS7	PGC-nano-LC-MS/MS8
				Treatment product composition	Exp m/z			Exoglycosidase	Treatment product composition	Exp m/z
					Untreat.	+HF	Δm/z			Undig.	+Enzyme	Δm/z
T-1	1201.46	H1N4F2-AA		H1N3-AA	-	-	-	-	-	-	-	-	-	-	-
N-1 T-2	1404.54	H1N4F2-AA		H1N4-AA	-	-	-	-	-	-	-	-	-	-	-
T-3	1753.68	H1N5F3-AA
N-2 T-4	1899.74	H1N5F4-AA		H1N5-AA	-	-	-	-	-	-	-	-	-	-	-
N-3 T-5	1956.76	H1N6F3-AA		H1N6-AA	-	-	-	-	-	-	-	-	-	-	-
A-1	2075.77	H1N5A1F4-AA		H1N5A1-AA	2075.89	1491.51	584.388	NS					Fig S2-E	Fig S3-D	Fig. S4-F1 a-b 2 isomeric structures
N-4 T-6	2102.82	H1N6F4-AA		H1N6-AA	-	-	-	-	-	-	-	-	-	-	-
A-2	2132.79	H1N6A1F3-AA		H1N6A1-AA	2132.93	1694.57	438.356	NS					Fig S2-E	Fig S3-D	Fig. S4-F2
N-5 T-7	2248.87	H1N6F5-AA		H1N6-AA	-	-	-	-	-	-	-	-	-	-	-
A-3	2278.85	H1N6A1F4-AA		H1N6A1-AA	2278.98	1694.57	584.407	NS					Fig S2-E	Fig S3-D	Fig. S4-F3 a-b 2 isomeric structures
N-6	2305.9	H1N7F4-AA		H1N7-AA	-	-	-	-	-	-	-	-	-	-	-
A-4	2335.87	H1N7A1F3-AA		H1N7A1-AA	2336	1897.64	438.363	NS					Fig S2-E	Fig S3-D	Fig. S4-F4
T-8	2337.91	H1N5F7-AA		H1N5-AA	-	-	-	-	-	-	-	-	-	-	-
N-8	2394.93	H1N6F6-AA		H1N6-AA	-	-	-	-	-	-	-	-	-	-	-
A-5	2424.91	H1N6A1F5-AA		H1N6A1-AA	2425.04	1694.57	730.468	NS					Fig S2-E	Fig S3-D	Fig. S4-F5
A-6	2481.93	H1N7A1F4-AA		H1N7A1-AA	2482.07	1897.64	584.435	NS					Fig S2-E	Fig S3-D	Fig. S4-F6
N-9 T-9	2540.99	H1N6F7-AA		H1N6-AA	-	-	-	-	-	-	-	-	-	-	-
A-7	2570.96	H1N6A1F6-AA		H1N6A1-AA	2571.1	1694.57	876.532	NS					Fig S2-E	Fig S3-D	Fig. S4-F7 a-c 3 isomeric structures
A-8	2627.99	H1N7A1F5-AA		H1N7A1-AA	2628.12	1897.64	730.488	NS					Fig S2-E	Fig S3-D	-
N-10 T-10	2687.05	H1N6F8-AA		H1N6-AA	-	-	-	-	-	-	-	-	-	-	-
A-9	2774.04	H1N7A1F6-AA		H1N7A1-AA	2774.2	1897.64	876.563	NS					Fig S2-E	Fig S3-D	Fig. S4-F8
A-10	2920.1	H1N7A1F7-AA		H1N7A1-AA	2920.27	1897.64	1022.63	NS					Fig S2-E	Fig S3-D	-
(0) Ref		Reference assigned to corresponding ion species.
		T = indicates that ion yields one of the 10 major signals in the total MALDI-TOF-MS profile
		A = indicates that ion yields one of the 10 major signals in the MALDI-TOF-MS profile of the acidic fraction of the egg GSL glycans
		N = indicates that ion yields one of the 10 major signals in the MALDI-TOF-MS profile of the neutral fraction of the egg GSL glycans
(1) Th. m/z		Theoretical m/z of the AA-labeled glycan in negative ion mode [M-H]-
(2) Composition		Determined glycan composition: AA= AA label, H = Hexose, N= N-acetylhexosamine, A = Hexuronic acid, F = Fucose
(3) Proposed structure		based on structural characterization performed using MALDI-TOF-MS/MS, glycan sequencing techniques and PGC-nano-LC-MS/MS. GlcA is predicted to be linked to either GlcNAc and GalNAc based on analogy with S. haematobium while the rest of the HexNAcs in the GSL glycan backbone are presumed to be GlcNAc, as shown is previous study (Khoo et al. 1997 doi: 10.1093/glycob/7.5.653) for the neutral GSL gly…
		Structures are represented using the CFG nomenclature:
(4) HF		Treatment with hydrofluoric acid, structural changes resulting from the treatment and corresponding experimental (exp.) m/z are detailed - NS = Not sensitive to treatment
(5) Digestion		Treatment with specified exoglycosidases, structural changes resulting from the treatment and corresponding experimental (exp.) m/z are detailed - NS = not sensitive to treatment
(6) In figure		Figure showing experimental data corresponding to HF and exoglycosidase treatments
(7) MALDI-TOF-MS/MS		Figure in which MALDI-TOF-MS/MS analysis of the ion species is displayed, when applicable
(8) PGC-nano-LC-MS/MS		Figure in which PGC-nano-LC-MS/MS analysis of the ion species is displayed, when applicable
