# Supplementary material for: Major human schistosome species express different glycans with immunological and diagnostic implications.
Source: Research Square preprint supplement (doi:10.21203/rs.3.rs-7103573/v1), 2025-07-30
Supplement: Supplementary file 3 [file 30a0ab9e0337386b145f20d6.xlsx]

## Sheet: IgG - raw
		S. haematobium infected																			S. mansoni infected																						Non-endemic sera
Fraction ID	Fraction Name	Sh_1	Sh_2	Sh_3	Sh_4	Sh_5	Sh_6	Sh_7	Sh_8	Sh_9	Sh_10	Sh_11	Sh_12	Sh_13	Sh_14	Sh_15	Sh_16	Sh_17	Sh_18	Average	Sm_1	Sm_2	Sm_3	Sm_4	Sm_5	Sm_6	Sm_7	Sm_8	Sm_9	Sm_10	Sm_11	Sm_12	Sm_13	Sm_14	Sm_15	Sm_16	Sm_17	Sm_18	Sm_19	Sm_20	Sm_21	Average	Uninf_1	Uninf_2	Uninf_3	Uninf_4	Uninf_5	Uninf_6	Uninf_7
1	Blk1	0	1268	472.667	149.667	0	174	0	0	1642	958.333	767	365.667	471.333	65.6667	1863	0	0	280.333	470.981	117.333	0	0	0	0	0	0	0	0	97.3333	0	0	0	0	22	1163	0	0	165.333	38.6667	0	80.1833	0	0	0	0	0	0	0
2	Blk2	0	479.667	0	0	40	0	154.333	0	0	0	0	0	0	0	0	147	0	0	45.6111	34.3333	0	0	252	11.3333	0	39.6667	21	0	0	0	241.333	57.3333	0	43.3333	0	0	0	0	38.6667	118.667	36.95	0	0	42.6667	0	0	33.6667	10
3	Blk3	710.333	291	0	18.6667	6412.67	0	575	1178.33	0	219.333	410.667	1794.33	0	1188	715.667	1058.67	0	144	817.593	0	187.667	253.333	0	0	562.333	0	0	0	337	0	0	0	143.667	0	0	407	450.333	0	0	27	117.067	0	87.6667	26.6667	116.333	58.6667	0	77
4	Blk4	0	0	452.667	0	0	36.6667	0	0	0	0	0	0	0	0	0	0	211.333	0	38.9259	474.667	20.3333	0	0	0	0	0	0	0	0	44	34	0	2.66667	62.6667	269.333	0	0	167	0	0	53.7333	0	0	0	0	0	0	0
5	Blk5	0	0	0	77.6667	469.333	0	0	12.3333	2656	0	0	0	1818	0	860.667	0	0	0	327.444	0	0	111.667	0	0	0	0	0	2441.67	218.333	0	0	199	0	0	3398.67	1356	0	0	0	0	386.267	0	0	0	73.6667	0	0	0
6	Blk6	120	0	382	0	0	0	327.667	1061	113	16	0	0	0	0	0	181	581.667	0	154.574	0	254.667	0	433.333	184.333	0	139.333	34	103	0	457.667	840.667	17	0	0	0	0	0	0	1	171.667	123.25	526.667	0	69	0	0	0	0
7	Blk7	635.667	557.333	0	726.333	1923	1352.17	0	0	205.333	1022.67	1475	2494.33	386.333	1604.33	4466.67	0	1198.67	269.667	1017.64	6116.33	0	409.333	1368.5	187	492	472.333	125.667	11121	1245.67	214.667	0	0	376.333	0	5384.83	1087	757	8777	0	0	1906.73	24.6667	151	0	153.333	40.3333	0	13.6667
8	Blk8	315	0	1051.5	0	0	0	228.667	1003.67	0	0	394	1953.33	0	356.667	0	1042.67	584.333	199.667	396.083	0	262	0	455.667	156.667	198.333	177	35.6667	77.6667	0	533.333	0	0	192.667	44.3333	0	0	65	0	0	106.333	109.917	96	44.6667	50.3333	115	55.3333	0	1.33333
9	Blk9	0	0	0	0	0	191	0	0	0	0	0	0	540	0	0	0	0	0	40.6111	0	0	95	0	0	675.333	0	0	0	0	0	1239	10.6667	0	0	0	774.333	127.333	125	225.333	0	163.6	39	0	0	0	8	0	0
10	Crude Ag ShCA	3907.67	959.333	4154.33	2289.33	557	3668.33	0	693	27588	5176.33	9963.67	23326	12886	3872.33	19695.7	2819.33	4350	4801	7261.52	14818.7	9785.33	2127.67	7628	3783.33	7751	7194	3710.67	15779.3	18209.3	82.6667	93.3333	8028.33	1992.67	2486.67	21206.3	25161.3	11031	12702.7	8608	1334.67	9109.02	619.333	239.667	279.667	1105.33	260.667	306.667	0
11	Crude Ag ShSEA	0	855	3656	2096	0	321.667	0	0	3383	3158	2421	4661.67	4437	3252.33	1468.67	0	654.333	3518.67	1882.41	2943	215.333	0	0	1085.33	1177.67	46.3333	1152.67	1411	577.333	125.667	0	901	635.333	1210	5927.67	13588	0	4918.67	376.667	0	1814.58	0	0	68	727	200.333	100.333	0
12	Crude Ag SmCA	3324.33	1797	2131.67	5603.67	1244.33	3736.17	569	1645	24333.7	5048	11857	12062	9792.33	1697	11506.7	144.667	1788.17	5415.33	5760.89	26570.7	5595.67	643.667	2902.5	3263.5	5535.33	3823.33	3261	8992	11860	184	0	21872.7	2045.67	1926.83	21981.3	21533.7	10615.7	13723	3651.33	468	8499.09	0	0	84	543	0	150	0
13	Crude Ag SmSEA	6526.33	3482.33	2011	10225	1643	11962.3	0	5343.33	21796.3	12565.7	14784.7	17123.3	20453.7	19.6667	15202.7	4973.33	7226.33	15801.7	9507.81	16235	233.667	1411	2878.33	2155	0	1882.67	2324	8172.67	7340.67	3561	2802.67	9442.67	2973	855	21487.7	21252.7	8027.33	7594.67	1404	131	6101.68	572.333	310.667	0	422.667	0	0	0
14	NG-1_2uM_x000D_	117.333	0	0	0	0	0	0	225.333	0	0	0	0	485	0	0	0	0	0	45.9815	0	96.6667	240.667	0	250.333	0	21	17	0	0	157.667	0	170.333	148.667	47.3333	0	1004.33	0	0	0	0	107.7	1137.67	0	98	0	17	0	0
15	NG-1_20uM_x000D_	0	0	0	0	0	0	339	810.667	0	0	0	0	0	0	0	0	0	0	63.8704	0	0	0	0	0	0	154	0	0	0	727.667	0	0	0	1.66667	0	0	0	0	91.6667	0	48.75	215	0	320.333	126.667	0	0	0
16	NG-10_2uM_x000D_	245	2659.67	689	745.167	1504.33	0	0	1108.33	2378.67	591	1056.33	3091.33	422.333	370	3752.67	8788.67	4617.33	0	1778.88	1170.33	642.333	0	0	907.667	0	0	74.3333	2594	0	0	0	98.3333	0	195	434.667	308.333	0	1880	136.667	645.667	422.083	0	0	0	238	311	275.333	133
17	NG-10_10uM_x000D_	0	35.3333	42	764	0	509.667	0	0	1386	2593.67	1499	0	1094.67	0	3014.33	0	0	1018.33	664.278	226.333	86.6667	138.333	0	976.333	0	0	0	0	395	0	0	638.333	0	47	1821	720.333	0	138	0	1360.67	259.367	920.333	0	0	0	0	0	0
18	NG-11_2uM_x000D_	6538.33	1649.67	591	10997	0	7747.33	0	1896	18723.3	5076	2388.67	6836.33	7567.67	274.333	15016.3	5842.33	2334.67	2126.67	5311.43	4977.67	0	0	467.333	228.667	1305.33	337.333	16	6920.67	2762	0	0	719.667	0	131.667	5540	635	210	3251.67	231.333	0	1386.72	1121.33	0	0	43	0	0	0
19	NG-11_10uM_x000D_	5703	3088	1839.67	11360	0	7741	0	3204.33	23670.7	7464.33	9040	8186	13761.3	0	17142	7819.67	4736.33	9752	7472.69	13349.7	0	92.3333	2069.67	752	1232.33	388.333	242	12638.7	3563.33	0	559.333	2078.67	0	138.333	11380.3	3469.67	0	4340	398.667	0	2834.67	45.3333	5.66667	0	0	0	0	0
20	NG-12_2uM_x000D_	13263	4503	3061.33	12938.3	5100.67	18969.3	0	13131.7	26899	6824.67	10610.3	19438	18962.7	1026.67	28016.7	20589.3	15635.3	8139.33	12617.2	26413.3	0	223	14714	3128.33	5402.67	1449.67	713	54549.3	16942	0	66	13924.3	178.667	3443.67	49579.7	4922	669.667	10705.3	3788.33	0	10540.6	530.667	0	35.3333	217	32.6667	0	117
21	NG-13_2uM_x000D_	0	0	112.333	0	510.667	0	0	0	0	245	58.3333	0	470	0	0	0	0	0	77.5741	0	0	294	0	0	0	0	0	0	0	0	0	279.333	0	0	280.667	946	629	0	2.66667	0	121.583	1141	0	0	24.3333	0	0	0
22	NG-13_20uM_x000D_	316.667	0	422.333	8609.67	1378.67	2325.33	0	0	5623.67	1745.67	443.667	1563.67	1694.33	369.667	2111	0	310	452.333	1520.37	7143	0	0	237	0	1205.33	0	0	0	227.667	0	0	221.667	0	0	8753.33	2593	312.667	4308.67	463.667	0	1273.3	705.333	45	0	0	0	0	0
23	NG-15_2uM_x000D_	18122	1677	5038	8239.67	570	21947.7	0	16238.3	13780.7	12279.3	18718.7	24313.3	25588	3024.33	30123.3	17424.7	21170	9710.33	13775.9	16245.3	484.667	862	17962	2555	4339	5296.67	434	38923.3	16231	0	683.333	15250.3	404.667	3802	37265	12373.7	836.333	19077.7	6614.67	53.6667	9982.03	480	0	0	326.667	47	0	0
24	NG-2_2uM_x000D_	0	0	0	0	0	0	0	0	0	0	420	3913.33	812.667	187.333	1956.33	0	450.667	0	430.019	0	1540	30.3333	0	0	368.667	265	0	0	0	538	752.333	0	0	1011.67	0	2822.67	243	158	282	0	400.583	0	36.6667	61.6667	177.333	0	0	0
25	NG-2_20uM_x000D_	0	0	0	0	0	0	554.333	0	0	0	0	0	0	0	0	0	0	0	30.7963	0	0	0	0	0	0	158.667	0	0	0	665.333	0	177.333	0	1012.33	143	354.667	0	15.6667	0	0	126.35	0	0	282.333	234	0	0	0
26	NG-3_2uM_x000D_	0	0	0	0	0	0	201.333	467.667	0	0	94	0	0	0	0	0	0	0	42.3889	0	0	198	0	3	0	0	0	0	0	536	0	95.3333	0	886.333	0	985	0	0	6.33333	0	135.5	703.333	0	54	60.6667	0	0	0
27	NG-3_20uM_x000D_	0	0	0	0	0	0	0	0	0	0	0	0	0	0	0	0	0	0	0	0	0	0	0	0	0	0	0	0	0	0	0	0	0	596	89	0	0	0	30.6667	0	35.7833	0	0	0	505	0	0	0
28	NG-4_2uM_x000D_	0	0	71.6667	0	0	0	0	435.333	0	278.333	1376.67	12751.7	855.667	242	0	615	0	0	923.685	0	204.667	114	0	227	649.667	0	0	0	1115	0	940.333	0	98.3333	1592.33	1703	1565	570	94	525	45	469.917	123.667	99.3333	17	507	0	0	0
29	NG-4_20uM_x000D_	73.3333	0	263.667	0	0	0	290.333	0	107.667	638	2341.33	12499.7	0	0	0	90	0	0	905.778	4392.33	127	113	0	1640.33	0	211.667	0	0	2058	0	663.333	66.6667	0	3210	1745.33	873.333	0	809.667	283.667	0	809.717	163.333	0	181	331.667	0	0	0
30	NG-5_2uM_x000D_	609.333	713	449.667	1012	0	3372.67	0	2188.33	2146.33	2916.33	1702.67	5235.33	1498.67	18.3333	3923.33	7336.67	4225.33	957	2128.06	1214	324	302.333	3372.67	278	0	131.667	0	6889.33	2952.33	444	0	1976	0	10843	4675.33	1039.33	719.333	2615	120	43	1894.82	797.667	116.667	113.667	87.3333	17	0	0
31	NG-5_10uM_x000D_	1556.67	1856.33	866.333	5880.33	0	8074	0	3872.33	11221	5193.33	8084	7354.33	15413.7	171.667	16472.7	6087	2157.33	6511.33	5598.46	5922	309	1.33333	3475.33	348	1979	330.667	161.333	24388.7	6969	557	0	5559	0	12817.3	24647	3780.67	278	8246.33	451.667	0	5011.07	366	0	142	85.3333	0	0	159.333
32	NG-7_2uM_x000D_	0	0	4.33333	0	0	0	0	0	0	117	126.667	0	1223.33	0	0	208	0	0	93.2963	0	0	109.333	0	0	433.333	0	0	0	0	0	1246.67	0	0	1571.33	202.333	882.667	0	9.33333	227	0	234.1	0	3	0	0	0	0	0
33	NG-7_10uM_x000D_	0	0	17.3333	0	0	0	0	0	0	579.333	169.667	0	820.667	0	0	0	0	0	88.1667	0	323	61	0	0	0	0	0	546	0	0	0	599.333	0	3411.33	1202	642	0	0	38.6667	0	341.167	0	0	0	0	0	13	0
34	NG-8_2uM_x000D_	0	431.333	0	0	0	0	0	0	924.333	475.333	262.333	660	0	0	325.333	0	0	0	171.037	0	0	190	0	98.6667	0	38.6667	0	177.333	0	216	0	89.3333	0	0	976.333	663.333	0	39	0	0	124.433	493.333	1.66667	0	0	43	0	0
35	NG-8_6uM_x000D_	0	279.333	35.6667	0	0	0	0	0	1823.67	1563.67	910.667	654	1362	54.3333	791	0	0	712	454.796	0	0	0	0	193	365.333	0	0	0	49.6667	0	1040.67	0	0	0	3176.67	3125.67	0	1188.67	0	0	456.983	0	0	0	0	15.3333	0	0
36	NG-9_2uM_x000D_	5530	598.333	172.333	1110.67	5150.67	6091.17	0	7884.67	4799.33	4465	4303.33	14494.3	7506.33	1744.33	17132	6490.67	4928.67	1090.33	5194.01	1455	443	231.333	8346	1590.5	2253.33	36.6667	448.667	43422	2421	0	420.333	1342	112.333	3322.33	20131.8	1015	502	4038.33	1394.67	2157	4646.32	0	109	0	705.333	27	0	0
37	NG-A1_2uM	3507.33	1445.67	846.333	8359	1183.67	8907	0	3117	8211.33	5325.33	3652.33	6207	19455	0	9628.33	6519.33	7987	4537	5493.81	2249	0	166.333	8277	1026.33	886.333	68.6667	319	20274.3	1526	0	811	8530.17	89	1560.67	14276.3	1461	37.6667	3168.67	308.667	352.333	3251.81	803	41.3333	0	0	0	0	241.667
38	NG-A2_2uM	15553	5021	2046	18414.3	6958.33	16935.3	0	12777	30971.7	12087	14267.3	21607	29471.3	0	18763.7	12056	13448.3	13153	13529.5	20388	0	283.333	7184.33	2325.67	0	341.667	570.667	24470.7	3699.33	0	0	13767	0	1740.67	25658.7	5294	497	11137.7	1446.33	0	5940.25	1000.33	0	0	0	16.3333	0	0
39	NG-A3_2uM	8205.33	4566.33	828.333	9217	6586.33	9075.33	0	4660.67	18579.7	7296.67	13803	7920.33	19141	1061.33	10554.7	8101	8365	4623.33	7921.41	14864.3	145.667	139.333	15209.3	1685	2300	947.667	401.333	22899.3	11081.3	0	542.333	5891	1345.67	4968.33	44698.7	6306.33	784.333	15733.7	1484	94	7571.38	751.667	0	0	272	113.333	0	0
40	Oglyc_CA1_0.08uM	16312.3	6000.67	7916	17627.7	3833.33	12971	2089.33	17964.3	31818.3	10300	23096	28219	32940.3	5857	27346	20415.3	22344	12800.7	16658.4	16714.7	4869.33	492.333	21137.3	8360.33	11819.3	11643.7	1772	49514.3	16197.7	629.333	0	41732	311.333	6298	42406.7	29221.3	3261	32345	6617.67	2418.33	15267.2	270	151.333	777.333	1274.33	269.333	21	237
41	Oglyc_CA2_0.602uM	8222.67	6374	4235.33	13752.3	1377.67	16584.3	256.333	3083	23755.7	10799.3	18066.7	17626.3	24478.7	2423.33	33745.3	15438.3	4421.67	10194.7	11935.3	8761	2962	522.667	5501.33	3292.33	0	3345	1390.67	38606.3	14458.7	279.667	0	12660.7	87	1991.67	36998.7	17904.3	3444.33	19113.3	2518.67	1168	8691.92	0	246.667	423	384.667	0.666667	0	0.333333
42	Oglyc_CA3_1.04uM	1227	1057.67	1164.33	3432	0	4465	322	1089	8251.67	4643.67	3023	3970	5249	64.6667	6349.67	3095	697	2664.67	2820.3	3088.33	1195.33	0	311	652.667	1287	298	182.667	7531.33	1832	681.667	0	842.333	0	202.333	6465	2525	2207.67	6130.33	0	83.3333	1771.63	0	196.667	430	308	38.3333	1019.33	0
43	Oglyc_SEA_1_0.18uM	4842.67	2238.67	1512	8526	1296	12826.7	186.333	2154.33	16678	7276.33	10007.7	8426.33	17765.3	0	13109.7	9932.67	10317.2	7893.67	7499.42	14514	0	0	6119	890.5	3616.33	168	196.667	22615	5652.33	0	0	4183.67	0	375.333	26329.8	26058	14.3333	12244	1364	0	6217.05	0	70.3333	0	284	0	0	3.66667
44	Oglyc_SEA2_0.102uM	1402.67	1318.33	602.667	1141.67	0	100.333	0	2406.67	5299.67	1605	0	1142.67	2970	0	5076.33	573.333	480	0	1339.96	92.3333	248.667	0	537.333	71	0	22	17.3333	4962	1147.67	0	0	795.333	0	209.333	8445.67	254.333	0	3057	59.3333	0	995.967	0	0	153	44	0	25	375
45	Shc_F07_02uM	0	4842.67	0	0	0	0	0	0	0	264	5815.67	3590	0	540	1643.67	0	0	1847.67	1030.2	0	0	0	0	0	550	0	98.6667	0	0	0	0	0	172.667	0	267.333	376.667	304.333	0	55.6667	0	91.2667	0	0	0	0	363	38	0
46	Shc_F08_02uM	0	8969	336	261	0	291	0	0	0	1220	555	0	1254.67	0	1430	0	0	403	817.759	0	72	0	370	43.3333	0	0	110	340.667	622.667	0	0	0	0	132	1447.33	5638.33	0	499.333	38.6667	11.6667	465.717	0	0	0	219.667	0	203	0
47	Shc_F09_02uM	1783	8233	1100.33	918	1472	2834.67	0	6548.67	12128.3	8198	14535.3	19706.7	3169.33	4293	23171	4786	3908.67	8753.67	6974.43	18514	47.3333	0	5505	2498.33	6438.67	3420.67	1384.33	27588.3	9134	0	0	12800	385.333	813.333	35510.7	9518	2343.33	12458.3	1570.33	259.333	7496.5	0	162	132.667	431.667	267	11	0
48	Shc_F10_02uM	0	10408.7	5562	620.667	725.333	2559.33	91.6667	1985.67	5147.33	5741.67	15405.7	9116	4972	5475.33	18807.7	3004	820.333	4295.33	5263.26	18374.7	62.6667	0	5293.33	311.667	3305.67	426	884	20588.3	10881.3	44.3333	0	13283	43	907.667	21713.3	14006.3	681.667	3337.67	2211.67	149	5817.82	0	403.667	95.6667	181	0	41.3333	0
49	Shc_F11_02uM	487	2039.33	0	0	0	0	0	0	0	0	960.333	3769.67	904.333	0	7880	0	0	666.667	928.185	0	0	0	0	0	1170	0	27	0	13884.3	0	0	276.333	0	0	145.667	733	389.333	0	84.6667	0	835.517	27	0	0	0	0	15.6667	0
50	Shc_F12_02uM	0	3245.67	330	302.333	0	408.333	0	0	0	549.333	3066.67	3100.33	1344.67	517.667	2890.33	0	0	371	895.907	1199.33	160.333	0	1499.33	58	0	70	49.3333	2860.67	5601.67	243.333	0	1732	0	137.667	3704.33	3647	283.333	1014.67	38.6667	0	1114.98	0	0	115.667	37.3333	0	24	4.33333
51	Shc_F12_06uM	1550.33	8261.67	850.667	2956.67	1868.33	3395.17	113.333	1519	1808.33	4584.67	19448	14716.3	4005.33	4862.33	34848.7	3769.17	1279.67	6532	6464.98	24909.7	106	0	4777.5	1174	3827.33	2209.33	1686.33	15490	16176.7	147	250.333	10999	398.333	2960.83	41417.8	15831.7	1093.33	14896.7	2199.33	101	8027.56	0	495.333	248.333	271	253	13	1.16667
52	Shc_F01_02uM	0	595	1250.67	39.1667	517.667	0	0	0	0	514	0	0	580.667	0	0	396.667	0	0	216.324	0	0	0	0	0	0	0	50.3333	0	0	0	0	0	110	9.66667	114.333	0	0	158.667	2.66667	0	22.2833	0	0	23.6667	0	6.66667	49.3333	0
53	Shc_F02_02uM	0	954	0	0	0	0	0	0	0	0	0	0	0	0	0	0	0	0	53	0	0	0	0	0	0	0	0	0	0	0	0	0	0	0	0	0	0	0	0	0	0	0	0	0	0	0	0	0
54	Shc_F02_06uM	1000.67	30531.3	348.333	5141	0	3883	0	0	1280	11803.7	22520.3	5219	6522.67	0	19866	664.667	22	11018.7	6656.74	1146	755.667	0	253	163	224.667	0	105	694.333	1230	0	0	17.6667	0	776.333	5110	2044.33	327.667	1636.67	0	0	724.217	0	100.333	69	167	0	52	0
55	Shc_F03_02uM	0	21059.7	0	0	0	0	0	0	0	0	1638.33	0	2934.67	0	0	0	0	0	1424.04	0	0	0	0	0	0	0	2.33333	0	0	0	0	0	0	0	16	0	0	125.667	10.6667	0	7.73333	0	0	0	0	0	0	0
56	Shc_F03_06uM	13991.7	30574	1613.33	19966.3	2281.33	21945.3	75.3333	12992.3	18881.7	20374	36825.7	34862	20661.7	2416	32401.3	15233.3	17646.3	31370.3	18561.8	23723	165.667	286	12850	4836.33	14667	6756.33	2602.33	14342.7	24418.7	109.667	401.333	15867	112.667	830.333	33839.3	18262.7	2373	5061	2238.33	208.333	9187.17	81.6667	2528.33	82.3333	170.667	37.3333	31	0
57	Shc_F04_02uM	0	6406	0	0	0	0	0	0	0	1925.67	1540.33	0	0	0	2071	0	0	6424	1020.39	0	0	0	0	0	0	0	0	0	950	0	0	0	0	0	0	0	178.333	0	0	0	56.4167	0	95	0	0	0	0	0
58	Shc_F05_02uM	502	2395.83	471.333	1412	630.333	1723.33	0	12.3333	3467	3171	7244.33	10512	7622.67	1071.33	18998.7	24.3333	0	4728	3554.81	10755	0	0	1355.33	87.6667	2416.67	240.333	141.667	4610	12719.3	0	0	5532.33	0	437	17131.3	7390	891	11126	253	0	3754.33	0	0	0	141.667	27.3333	0	0
59	Shc_F05_06uM	10990.3	5240	0	0	0	0	921.333	13903	21793.3	10840.7	27507.3	40023.7	751.333	10396	49490.7	15146	10003.7	12260	12737.1	0	802	0	19133	14242.7	0	17501.7	2333.67	56461	26821	3916.67	0	489.333	808.667	9813	12.3333	0	4215.33	0	134	2569	7834.22	0	1145.67	1011.33	638.333	371.333	0	37
60	Shc_F06_02uM	0	7291.33	0	170.667	225	400	0	0	0	270	645	0	367	0	0	0	0	359.667	540.481	3	238	0	48	1.33333	0	0	129.667	0	170	0	0	0	0	26.3333	991.333	9804	24.6667	537.333	38.6667	0	600.617	0	0	0	0	0	76.6667	0
61	She_HFa_F01_02uM	69.3333	9825.67	328.667	5970.33	430.667	3170	235	5053.67	0	1631.33	18000.7	21262	10880.7	4759.67	2739.67	1109.67	0	4712	5009.94	0	0	24	29.6667	0	259.333	107.667	37.3333	0	474.333	428.667	0	0	0	127.667	0	0	0	12283	38.6667	27	690.517	415.667	0	138.333	10	0	1	0
62	She_HFa_F02_02uM	0	14441.7	279.667	5021.67	146.667	5896.67	0	2546.33	0	2346.67	22081.3	22494	22369.3	4563.33	6587	782.333	0	14652	6900.48	0	0	0	124.333	0	1894.83	63.6667	187.333	0	76.3333	308.667	0	174	37	354.667	0	0	0	1570.67	0	196	239.575	483.667	0	95	0	0	5.66667	0
63	She_HFa_F02_06uM	54.3333	9902.33	1695.5	8166	1328.33	7512.33	0	1723	191	1924	24961.3	31190.3	31550.7	6198	10801	3103	0	35520	9767.84	0	31.3333	119.333	0	0	1333.33	0	47.3333	0	2074.33	0	671	74.3333	468.333	539.667	43.6667	295	0	15237	35.3333	0	1048.5	652	0	11.6667	0	0	103.667	0
64	She_HFa_F02_10uM	0	7623	1874.67	6781	896.667	8210.67	0	339.667	154	1501.67	22959.3	38065	25130.3	6310.33	9026	2084	37	35110.3	9227.98	0	0	0	0	0	2847.67	0	152.333	215.667	1879.33	323.333	225.333	318.333	353.667	1097.67	0	392.667	0	6985.33	38.6667	273	741.5	19	0	17	0	0	113.333	4
65	She_HFa_F03_02uM	0	12246.3	570.333	6963.67	719.333	2171	199.333	3934.67	0	1453.67	20770.7	24846.3	26201.3	3354	5447	2058	0	25035	7553.93	83.3333	189.667	259.667	88	21.3333	338	83.6667	131	0	2027.33	340.333	0	0	77.3333	333	326.667	1161	10	14169.7	49	0	984.45	0	0	56.6667	54.3333	0	0	44.6667
66	She_HFa_F03_06uM	1310	10345	1348	4653.67	967.333	6700	0	580	486	2164	26693.3	30530	23736.7	7269	11159.3	820.333	0	28018.7	8710.07	435.333	81	14	0	66.6667	1379.67	0	269.667	0	1686	0	0	0	540.667	1854	655.333	492.667	0	12878	38.6667	120.667	1019.58	176.667	0	77	0	0	0	0
67	She_HFa_F04_02uM	0	14818.7	906.667	8689.67	136.667	2064	0	2324.67	1276.67	1335.67	18648.7	23560.7	38790	3326.33	6347	278	0	30610	8506.3	0	95	73.3333	502.667	13.6667	422.333	49.6667	8.66667	0	83.3333	0	0	400	71.3333	1186	0	415.667	140.667	21186	0	110.333	1232.42	787	0	39.3333	48	18.3333	0	72
68	She_HFa_F04_06uM	0	9629	1867.33	3822.67	419.333	6030.33	62.3333	1710	0	1565	22960	24272.3	34711.7	5686.67	10252	1314.67	0	31446.7	8652.78	0	92	0	304	0	2276.33	83.3333	302	0	1027.67	218.333	0	147.667	580.333	1297.67	41.6667	1785.67	0	17042.3	78.3333	95.6667	1263.87	0	0	123.333	9	0	67.6667	10
69	She_HFa_F04_10uM	564.667	11163	1036	8146	1247	5157	0	2791.67	0	1915	24911	24290.3	27413.7	4717.33	12134	2528.33	0	38640.3	9258.63	59.3333	127.333	78	127.333	0	2323.33	85.3333	251	6	2359.33	206	0	0	548	1997.67	0	1008.33	0	15235	0	10	1220.6	0	0	1	9.66667	0	26.3333	18.3333
70	She_HFa_F05_02uM	0	7990.67	0	2343.33	661.667	4793.67	200.333	321.667	187.667	1631.67	16806.3	15862	12518	3099.33	2517.67	1123.67	0	3661.33	4095.5	0	176	19.3333	113.667	0	253.333	89.3333	170.667	0	51.3333	327.333	0	80.6667	44	266.333	0	52	0	3985.33	38.6667	18.6667	283.4	0	0	12.3333	0	0	0	19.3333
71	She_HFa_F06_02uM	0	12524.3	792.333	8882.33	310	3061	0	559	0	2215.33	21608	28846	29636	4614.67	7913	999	253.667	30592.7	8489.3	0	0	178.667	158.333	62	783.333	4.66667	76.3333	0	1045	231	0	423.667	103.333	1097.33	9.33333	385	0	23983.3	38.6667	17	1429	370.333	0	0	5	0	12.6667	0
72	She_HFa_F06_06uM	94.3333	11095	1447.67	3822.67	430.333	7441.67	16.3333	497.667	0	2156.67	21766.7	27176.3	32702	5943.33	12643.7	1807	0	31798.7	8935.56	500	0	0	168.667	103.667	2556.67	0	419.333	0	684.667	339.333	62.3333	75.3333	515.333	546.667	775.333	2491	0	24963.7	0	6.66667	1710.1	15.3333	0	16	0	0	0	10.6667
73	She_HFa_F06_10uM	49	12406	749.333	7120.33	909.333	5848	257	5134.33	0	2066.67	22358.7	37234	24350.3	6207	8564.33	1511.67	194.667	34873.3	9435.22	3079.67	136.667	196	296.667	289	1828.33	42	483.667	281	2244.33	348.333	0	33.6667	515.333	260.333	1744	1214.67	0	24930	25.3333	195.333	1897.45	65.6667	0	115	20.6667	0	7.66667	6.66667
74	She_HFa_F06_20uM	81.3333	7298.67	942.667	6870	1014.33	4577	224.333	930	0	2145.67	22096.3	33341	22271.3	7647.67	10559.3	1549	368	11319	7401.98	6907.33	159	29.6667	276.667	498.667	1322.33	58	526.333	0	2381	397	0	170.667	193.333	1066	1170.33	1098	0	19741.7	0	170	1799.8	0	0	130	0	0	0	34.6667
75	She_HFa_F07_02uM	0	6466.33	830.667	7250.33	356	4355.67	60	0	0	1267.33	17272.3	24607	32350	2086	7063.33	593.667	0	25445.7	7222.46	2449	35.6667	127.333	226.333	253.667	697.333	88.6667	0	0	747.667	276.333	0	145.333	6.66667	1375.67	1654	669	0	21733	14.3333	63.3333	1525	501.667	0	62	39	0	0	0
76	She_HFa_F08_02uM	144	5561	1045.33	3758	285	4676.33	0	3715.67	208.667	1436.33	17264.7	24482.3	7220.67	3513.33	5209.67	2414.67	50.3333	19290.7	5570.93	508	0	0	167	480	890.333	10.3333	54.6667	0	744	0	196	282.667	0	518	1598.33	101.333	0	14343.3	0	0	994.7	0	0	22.6667	120	0	0	0
77	She_HFn_F03_02uM	0	13798	0	1625	0	0	0	1203	0	4098	13490.7	2708.33	778.333	123.667	4609	0	0	12906.3	3074.46	0	100.667	365	0	0	0	54.3333	83	0	167.333	100.667	358.333	68.3333	79.6667	98	0	2472	1.66667	0	38.6667	0	199.383	264.333	37	131.667	138.667	18.6667	1	0
78	She_HFn_F04_02uM	0	7931.33	266.667	2150.33	760	0	0	0	177.333	1652	3673.67	0	246.667	0	1449.67	0	0	1799.67	1117.07	0	31	0	172	310.333	0	0	76.3333	0	34.6667	0	535.667	0	27.6667	67	1132.67	0	0	652	38.6667	83.6667	153.9	967.667	0	13.3333	0	0	0	0
79	She_HFn_F05_02uM	0	8359.67	525.667	3080	0	0	66.3333	32.3333	98	1469.67	3202.33	1039.67	2237.67	345	1061.33	0	0	1553	1281.7	480.333	76.3333	16.3333	222.667	110	282	82	0	0	491.333	0	610	0	171	105.333	1461.33	468.333	197	1951.67	1.66667	30.3333	336.367	784.333	2.33333	39.3333	522.333	18.6667	0	0
80	She_HFn_F05_06uM	0	14838.7	374.333	7785.33	461.333	3173	101.333	48	2405.33	3216.33	9302.33	3495.33	13369.7	1049	23147.3	2143	0	6066	5054.24	25065.3	163.667	0	501.333	4353.33	12282	133.667	887.333	5554	14576.3	317	28107.7	2715.33	2180	2019.33	10162.7	4717.67	592.667	7520	1.66667	451.333	6092.55	0	268.667	142	5045.67	179	93	10.6667
81	She_HFn_F06_02uM	0	6842	292.667	999.667	524.333	899.167	285	0	0	609	1819	1413.33	1274.33	255.667	24.3333	0	0	528	875.917	2774.67	64.3333	198.333	0	3728	871.667	180.333	120.333	128	787.667	445.333	190.333	0	166.667	316.833	2243.33	427.333	191.667	2180.33	38.6667	0	752.692	0	0	242	267.667	58.3333	16	12.6667
82	She_HFn_F06_06uM	425.333	12309.7	516.5	5429.17	2040.67	2432.67	181.333	675.333	48.6667	2463	3872.33	1699.33	8973.67	586.5	13000.7	1452.67	388.667	4771	3403.73	4886	153	101	0	3693.67	5300.33	86	318	0	947.667	265.333	4659.33	1576.67	401	873.333	6501.67	0	136.833	4118.33	38.6667	17.6667	1702.84	0	51	63.3333	1867	8	11.6667	0
83	She_HFn_F07_02uM	0	10781.7	578	2383.33	0	240.333	0	0	113	1589	3385.67	971.333	9247.33	394.667	1928.33	0	0	2117	1873.87	10475.3	24.6667	38.3333	332	3759	4953.33	38.3333	77	54.6667	3117.67	0	7824.67	828.667	226.667	516.333	7186.67	1235	451.667	15911	38.6667	0	2854.48	365.333	0	25	931	22.3333	0	0
84	She_HFn_F08_02uM	0	9233	736	2600.67	0	248	0	0	0	1395	3554.67	2446.33	1933.67	289.333	734	0	0	1697.67	1381.57	4181.33	48	0	283.667	2171.67	591.833	0.333333	159	147	895.667	179.667	0	476.667	112.667	432.333	7132.67	0	56.3333	6957	0	62.6667	1191.29	0	0	39.3333	626.667	0	0	0
85	She_HFn_F08_06uM	0	12417	679.333	3414.67	225	3976.33	36.3333	0	0	2966	8291	4023.33	2592	665.333	668.667	37.3333	0	7546.33	2641.04	7163.67	80.6667	169.667	122.333	4330	10154	114.667	371.667	814	5768.33	322.333	1511	0	308.667	469	7801.33	762.667	461.333	13895.3	38.6667	0	2732.97	0	0	167	1178	0	0	22.3333
86	She_HFn_F09_02uM	0	2960.67	0	2481	329.333	1059.33	0	929.333	0	604.333	6787.67	6695.67	0	1104.67	2157.33	608.333	0	3617.67	1629.74	0	30	0	45.3333	0	0	0	0	0	193.333	0	54	162.333	51.6667	61	0	68.6667	0	5241	38.6667	0	297.3	0	0	36.3333	117.333	10	5	0
87	She_HFn_F10_02uM	0	4275.67	734	4469	502.667	1135.67	0	84.3333	0	1352.67	6050.33	4344.33	8952.67	600.667	842.667	67.6667	0	2227.33	1979.98	5549.67	142.333	0	286.667	1963.67	1820.33	95	200.667	181.333	1702.33	254	0	206	122	298	5162.67	13.6667	131.667	10091.7	7.66667	145	1411.47	0	0	126.667	447.333	23	0	0
88	She_HFn_F11_02uM	0	1303.33	0	3001	0	815.667	0	0	0	0	0	0	0	0	0	0	0	0	284.444	3460	49	320	0	190.333	0	0	0	0	0	144	0	169.667	0	32.3333	0	989.333	99.3333	8335.33	38.6667	0	691.4	0	0	46.6667	0	0	0	12
89	She_HFn_F12_02uM	0	5139.67	700.667	3205.67	124	539.667	0	5501.33	3	1017.33	8547.33	11413.7	2242.67	663.667	0	845.333	0	6036.67	2554.48	3002	62.3333	71.3333	241	625.333	486.667	98.6667	0	0	693.333	212.667	940	0	80.6667	338.667	1845.33	302.333	44.6667	2974	0	0	600.95	634.667	0	68	93.3333	0	0	0
90	She_HFn_F12_06uM	0	2250	570.333	5161.67	849	2555	162.667	4177	4.66667	259.333	9389	5700	6064.67	515	23	690.333	0	5034.33	2411.44	3976.67	0	0	0	2367.33	1360.67	0	10	0	856.667	0	0	408.333	0	776.333	3514.67	134.667	0	17298	22	0	1536.27	0	0	9.33333	50.6667	0	0	0
91	She_HFn_F12_10uM	2113	9059	1460.67	5701	2023	1587.67	0	2930	0	1966	15410.3	15972	22077.7	2740	5841.67	2584.67	512.167	25654.7	6535.19	12994.3	0	268.333	56.5	2257	4525.67	222	324.667	1763.5	7051.33	0	0	337.333	564	1296.33	7122.83	0	821	16840.7	21.3333	0	2823.34	0	84.3333	123.333	509	35.3333	4.33333	53.6667
92	She_HFn_F13_02uM	19.6667	5639.67	928.333	2591.17	847.667	5089.33	296.333	2573	0	1538	11771.8	16193.7	6991	2515	3042.33	1102.67	66.3333	6147.5	3741.86	3727.67	26	8	0	384.333	2887.67	83	248.667	0	2221.67	0	7.33333	198.333	230.667	568.333	4333	0	0	14437	0	54	1468.08	0	0	153.333	149.333	108.333	51	26
93	She_HFn_F01_02uM	0	857.667	215.333	0	204.333	0	0	0	0	633.667	214.667	0	0	42	0	0	0	0	120.426	0	25.6667	129.333	116.333	0	0	0	0	0	0	0	696.667	0	56.3333	538.667	0	356.333	129.333	0	13	0	103.083	1154.67	0	0	23	0	0	0
94	She_HFn_F02_02uM	0	2742	602.667	171	0	0	0	0	0	0	96.6667	0	0	0	0	0	0	0	200.685	189	15.6667	0	224.333	0	62.3333	0	0	0	46	0	0	147	0	55.6667	1345	123.667	0	767.667	0	621	148.817	383.667	44.3333	15.6667	0	0	18.3333	0
95	She_HF_F01_02uM	0	941.667	304.333	0	0	0	0	0	0	0	65	0	0	0	0	0	0	0	72.8333	148	24	213.333	255.667	0	822.667	15.6667	0	0	0	170.333	224.667	261.667	0	66	0	423.667	152.333	0	38.6667	0	140.833	867	0	0	20	0	0	0
96	She_HF_F01_06uM	0	640.333	322.667	0	0	0	38.3333	0	0	0	147.333	0	0	90.3333	0	0	0	0	68.8333	0	107	0	384.667	17.3333	0	49.6667	15.3333	0	0	245.333	41.3333	0	15.6667	0	0	0	72.6667	172.333	7.33333	116.667	56.4333	161	0	101	13.6667	4.33333	0	0
97	She_HF_F02_02uM	0	0	0	0	0	0	0	0	0	0	0	0	0	0	0	0	0	0	0	0	0	45.6667	0	0	0	0	32.3333	0	0	0	0	77.6667	47.3333	54.6667	0	1448.67	0	0	1.66667	0	85.4	0	0	21.6667	0	4	0	0
98	She_HF_F03_02uM	0	274	0	0	0	0	0	0	0	0	65	0	0	0	0	0	0	2102.33	135.63	460.333	76.6667	0	0	0	0	0	31.3333	0	0	187	0	0	0	0	0	0	0	0	38.6667	41	39.7	718.667	0	77	0.333333	0	75	0
99	She_A_F03_02uM	0	11900.7	911	2171	798	2430.17	0	943.333	125.333	3278	14957	19348.7	4953.67	2369	8051.67	963.667	137.667	23207.7	5363.69	0	82.3333	0	0	0	0	0	183.333	0	425.667	24.3333	0	0	157	236.833	0	86.6667	0	2101.33	38.6667	0	166.808	0	0	79.6667	71.3333	0	5.33333	0
100	She_A_F03_06uM	304.667	15157.3	1856	4832.67	1426.33	5712.33	0	1914.33	804.333	3002	14341.8	24775.3	17905.7	5004.5	13198.3	2760.67	331.333	23213	7585.59	0	52.6667	0	0	0	730.333	0	458.333	0	719	0	0	407.333	121.333	569.667	808	905	0	2902.33	38.6667	0	385.633	0	0	2	0	0	85.3333	0
101	She_A_F03_10uM	439	19122	797	0	0	0	0	737.667	1068.33	3825.67	24479.7	34265.7	8336.67	6519	17034.3	3080.67	0	34168.3	8548.56	0	0	74.3333	0	0	2822.33	0	266.667	0	1930.67	0	0	416.667	385.667	354.667	0	3723.67	0	48.3333	171.667	1	509.733	1072.33	0	0	0	0	177.333	0
102	She_A_F04_02uM	0	2210.33	100	1472.67	0	0	0	0	0	385.667	1002	4654.67	0	98.3333	0	0	0	1158	615.648	0	0	0	75.3333	0	0	0	0	0	349.333	0	175.333	52	0	0	0	457.667	0	0	38.6667	0	57.4167	597	0	0	0	0	0	0
103	She_A_F04_06uM	0	6917.67	295	1122.33	0	521.667	0	530.667	1138.67	2763.33	6268.67	11225.7	2738.67	786.667	2713.33	0	0	8734.33	2542.04	0	0	0	108.667	0	0	0	35.3333	0	3565.67	0	0	59.6667	0	0	0	0	0	52.3333	38.6667	0	193.017	0	0	0	0	0	4.33333	0
104	She_A_F04_10uM	121.333	13414.3	75	1875.33	1001	851.167	105	133.333	375.667	6760	10605.7	8531.67	6147	1294	2636.67	1052.67	333.667	19434	4152.64	0	118.333	107	0	43	0	76.3333	183.333	0	5566	142.667	0	0	19.6667	118.833	146.833	16.3333	0	3808.33	38.6667	0	519.267	0	0	164.333	162	74.6667	0	13.6667
105	She_A_F04_20uM	3486.67	17656.7	1117.67	3269.17	1071	4531.33	0	2280.33	2535	7728	11352.3	27197.7	26773	3866.5	14618	1479	180	20348	8305.02	0	0	95	0	0	438	0	527.667	295	31925	0	0	0	0	0	953.333	0	0	2166	38.6667	0	1821.93	0	5	0	0	0	0	0
106	She_A_F04_60uM	277.667	19438.3	732.333	4318.67	2464.33	5832.67	0	2603.33	696.333	6388.33	20428.3	32365	25327.7	3970.33	11439.3	2358.33	0	38599.3	9846.69	0	0	110	267.333	0	5400	12.6667	29.3333	5849.33	26339	9.33333	0	177.667	0	133	525.333	523.333	0	516.333	38.6667	0	1996.57	1051.67	0	0	0	0	167.333	0
107	She_A_F05_02uM	0	3726.33	478.333	319	0	24.6667	0	0	0	1036.33	2223.67	4522.67	1606.33	229.667	549	0	0	2982.67	983.259	79.3333	13.6667	0	0	0	36.3333	0	0	0	0	0	0	0	0	0	0	0	0	255	0	0	19.2167	0	0	0	0	0	0	0
108	She_A_F05_06uM	0	10067.7	392	980.667	0	675.333	0	0	223	4291.33	10601	17843	875.333	1753	5666.33	0	0	22151.7	4195.57	352.667	98	0	64	0	0	0	9.66667	0	808	68	0	0	0	94.6667	0	661.667	0	162	38.6667	0	117.867	0	0	26.6667	0	0	0	0
109	She_A_F05_10uM	0	15835	571.333	1455.33	1325	3631.67	0	114	0	7797.33	15475	19258.3	4113	3636	3832.67	1512.67	0	22334	5605.07	0	0	7.66667	0	0	0	0	60.6667	0	1855	29	0	259.667	0	309	0	0	0	759.833	38.6667	0	165.975	581.667	0	2	0	0	10	0
110	She_A_F05_20uM	0	15474.3	1310.33	1210.33	161.667	3255.67	0	2963.33	161.333	4538.33	17053	24582.7	2951	2885	9084.67	1697	0	33170.3	6694.39	0	82.6667	63	102	0	1362	0	0	173.333	3415.33	174	0	149.333	0	107.667	0	761	0	806.667	38.6667	0	361.783	829	0	0	0	0	0	0
111	She_A_F05_60uM	299.333	12892.7	3186	6431.67	412.667	4995	0	48.3333	703	4380.67	19449.3	31313	27347	4973.67	12736	1727.67	0	34261.7	9175.43	0	40.3333	13.3333	224	0	1507	0	0	424.333	3831.33	21.3333	0	120	468	1216	234	79	0	1209	38.6667	54.6667	471.317	0	0	46.3333	0	0	61.3333	0
112	She_A_F06_02uM	72	12979.3	1730	1293	83	7030	0	100.667	0	5793.33	27292	28658.3	31951.7	7307	11348.3	1123.33	0	31431.3	9344.07	0	83.3333	0	236.333	0	604.667	0	0	3562	11790.3	225.333	0	203	198.333	141.667	124	0	0	1820	38.6667	25.6667	951.383	17.6667	0	29.3333	0	0	0	0
113	She_A_F06_06uM	0	11691.7	1038.33	6159	744.667	1202.67	137.667	564	0	2195.67	26508.7	29128.7	24804.3	5880.33	7625.33	1744.33	178	35366.7	8609.44	396.333	154.333	41.3333	0	0	907.333	56.6667	334.333	4683	12840.3	300.667	0	0	64.3333	577.333	356.667	1271	0	5150.33	23.6667	0	1357.88	0	0	69	0	0	0	42
114	She_A_F06_10uM	347.333	9048.67	3799.33	1967.67	1179.33	7209.67	0	363.333	417	1924	23910.3	43028	15541.3	8482	12379.3	1229.33	0	30373.3	8955.56	0	87.3333	8	55.6667	0	870.667	52	277.333	2347.33	8967.67	306.667	0	138	285.333	425.667	0	353.333	0	2756.67	8.33333	21.3333	847	0	0	0	0	0	0	0
115	She_A_F06_20uM	352.667	9205.67	4727	3145.33	1308.33	6826.67	0	259.333	0	1502.67	25196.3	37367.3	17273.3	8007.67	13461.7	2523.33	148.333	37005	9350.59	0	37	191.333	139.667	44.3333	883.667	0	81	2306	8310	0	1083.67	0	478.333	180.667	0	891	0	3768.67	38.6667	48.3333	921.7	1030	0	0	0	0	71.6667	0
116	She_A_F06_60uM	506.333	8172.67	4554.33	1626	993.667	6761	0	1312.33	0	1013	23752	40532.7	24515.7	8464.67	9051	3636.33	60	35207	9453.26	0	0	0	83.3333	48.3333	2108	17.6667	142.667	1819	6904.67	438.667	0	141	379.667	503.333	0	120.333	0	5962	0	103.333	933.433	0	0	55	0	0	40.6667	0.333333
117	She_A_F07_02uM	456.333	13569.3	426	2642.67	2428.67	2445.67	317.333	699.333	1125.67	3898.67	24253.7	31502	13307	3483.67	6392.33	504.167	102.667	26762	7462.06	1520.67	50.6667	234.333	0	0	334.667	109.667	1213	8773	10264	308.667	0	0	85.6667	185.333	3779.83	46.3333	0	3536.33	38.6667	0	1524.04	0	0	182.333	0	33.6667	0	74.6667
118	She_A_F07_06uM	654.667	8320.67	852.5	3938.67	1717.33	5751	287.333	1135.67	0	1505	12028.3	29732.7	20889.7	4587	6576.67	1903.67	236	18446	6586.82	861	128.667	187.667	41	95.3333	1170	92.6667	215	8231.33	23359.3	0	0	860.667	8.33333	274.667	1608.67	93.6667	0	2629.67	38.6667	0	1994.82	0	0	219	3.66667	16.3333	0	26.3333
119	She_A_F07_10uM	0	12698	671	2431.67	1168	5120.67	0	757.333	0	1993.33	25074.3	40333	19537.3	5062	13066.7	1793	0	38116.3	9323.48	0	138.333	83.3333	381.333	16	1651.67	55	89.3333	9599.33	17738	237	0	338.667	276	209.667	914.333	444.333	0	716.667	38.6667	0	1646.38	932.667	0	53	0	0	50	0
120	She_A_F07_20uM	425	9942	1236	2883.33	952.667	6421.67	0	865.333	0	1346.33	21567.7	41621.3	25789	5162.33	17565.7	1569	0	28919.7	9237.06	0	141	0	0	64.3333	1462.67	0	114	8289.67	13950.3	191.333	0	0	325.333	367.667	1655.33	49.6667	0	8998.33	53	59	1783.13	314	0	41.6667	0	0	0	0
121	She_A_F01_02uM	0	7914.33	395.667	646.333	565.667	486.333	0	371.667	0	531.333	8764	9565	2567	199.667	23613.7	233.667	0	21128.3	4276.81	0	0	0	0	0	0	0	82.3333	0	0	0	0	0	0	29.3333	0	0	0	362.667	16.3333	0	24.5333	0	0	44.6667	0	0	50.3333	0
122	She_A_F02_02uM	323.667	14975.7	876	3872	822	5085	402.667	1361.67	0	969.667	10634	19826.3	16914	4283	5462	1667	0	20934	6022.7	0	337	20	409.333	41	904.667	239.333	0	0	409	617.333	151.333	0	54.6667	145	0	72.6667	424	1475.67	0	176.333	265.05	243.667	0	16.3333	64.3333	26.3333	0	0
123	She_A_F02_06uM	261	16795.3	841	4256.67	1167.67	6952.33	405.333	2299	0	1839.33	26357.7	35061.3	19364.3	5275.67	9002.33	2411.67	769.667	31032.3	9116.26	0	295.667	0.333333	227.333	137.333	1354	117	158.333	0	739.667	489.667	0	0	41	233.333	25.3333	0	0	2747	38.6667	156.667	330.233	205.333	0	143.333	46	11	8.33333	11
124	She_A_F02_10uM	395.333	9897	2416	5108.67	2313	4904.67	507	795.667	0	1254.33	23363.7	34026	17752.7	4969	11062.3	2377.67	706.333	36196.7	8780.33	1175.67	331.667	349.333	48.6667	0	1215.33	197.333	70	40	1568.67	548	0	51	174.667	546	0	934.667	0	3166	0	0	520.85	0	0	242.333	0	3	0	42.6667
125	She_N_F07_02uM	715.667	14830.3	902.667	7160.33	2307	245.667	0	0	3139.67	4072.67	9075.33	6784.67	14183.3	6891.67	7776.33	0	0	462	4363.74	3591.67	0	0	0	4991.67	938	0	203	1513.67	11212.3	0	0	918	0	128	4065.33	352.667	0	18645.3	0	0	2327.98	725.667	0	0	5.66667	0	53	0
126	She_N_F07_06uM	1833.33	18888.7	625.333	0	0	0	194	0	2234.33	4520.67	17871	12637.7	1741.33	12257	7876.67	1779.67	0	2370	4712.76	0	172.667	0	564.667	3660.67	1078.67	116.667	1234.67	13242	33090	157.667	0	323.667	306	802.667	541.333	632.333	110.333	0	54.6667	178.667	2804.43	631.333	0	59.6667	52.3333	11.3333	0	0
127	She_N_F07_10uM	131.667	16440.3	2299.33	3744.67	1632.67	914.667	0	423	2250.33	5658.33	15197	7843	12500.7	18344	7665.67	535.667	0	3844.67	5523.65	12443.3	114.333	0	467.333	3439	630.667	0	732.667	7213.33	26438.3	0	389.333	2383	735.333	597	9371.33	3122	248	9085.67	55.3333	62.6667	3873.3	0	0	83.6667	43.6667	0	0	6.33333
128	She_N_F07_20uM	563.333	16809	1070.67	6647.67	2768.67	317	45.6667	201	0	5077.33	15859.3	7928.67	883.333	20385	10385.7	2031	147	4420	5307.8	18502	166	0	1589	6844.67	1712.33	44.6667	756.333	19302	15672	0	0	2682.67	724.333	1603.67	18746	3782.5	299.667	7955.67	38.6667	0	5021.11	0	0	0	126.333	0	0	0
129	She_N_F08_02uM	1731	17175.7	3856.67	1857.67	65.3333	2345.67	0	0	3188	8671.67	19368.3	17208	25384.7	10427.3	11561	0	0	7624.67	7248.09	3303.67	0	0	381.333	3423	5608.67	0	805.667	4798.33	26161	0	0	1930	527.667	513	5574.67	1932.67	334	15550.3	38.6667	0	3544.13	0	0	0	101	0	0	0
130	She_N_F08_06uM	5.33333	15225	3153.33	3669.67	1303.33	853.667	117.667	0	0	7334.33	20635.3	13424.7	19009	14395.3	5578	1418.33	0	14863.3	6721.46	12936.7	89	334.667	758	3594	3989.33	89.3333	1137.67	13205.7	23639	169.667	0	1682	801.333	538.333	16867.7	2375	739.333	15893.3	39.6667	0	4943.98	78	0	121.333	105.667	0	0	34
131	She_N_F08_10uM	2577.33	15769.7	3931	5033.67	2012.33	3065	0	237	2007.33	6472	24418.7	12932.7	19669.3	14646.7	13054	1498.67	125	16227	7982.07	16338.3	84.3333	0	1261.33	7441.67	2584	101	1513.67	13421	32402	0	437	4057.67	747.333	878.333	18282.7	7166.67	982.333	6183	0	145	5694.12	766	0	9.33333	51	0	0	0
132	She_N_F09_02uM	0	2413.67	0	0	0	0	0	0	0	315	1248.33	256.667	391.333	122	0	0	0	134.667	271.204	899.667	60.6667	289.333	72.3333	107.333	0	0	13.3333	107	135.667	48	85.6667	0	0	85	0	1020.33	0	0	38.6667	0	148.15	0	0	66	50.3333	6	0	0
133	She_N_F09_06uM	262.333	10049	330.667	2462.67	1308.67	257	0	0	0	4562.33	8372.67	9397.67	12092.3	6026	1195.33	0	0	2104.33	3245.61	761.667	0	0	0	274.667	234.667	0	554.667	58.3333	6977.33	61.3333	0	378.333	0	0	3950.33	0	0	1829.67	38.6667	0	755.983	0	0	17	0	0	0	0
134	She_N_F09_10uM	276.667	17215.7	976.333	4124.67	88.6667	251	0	0	0	4845.33	17189	13375.3	20830.3	10487.7	4807.33	0	0	8371	5713.28	978	70.6667	63.6667	141	1577.67	778.667	8.66667	628.333	2911	10370.3	34.6667	0	236	136.333	60	2521	880	45	13157	21	0	1730.95	1333.33	0	44.3333	27.3333	0	0	0
135	She_N_F09_20uM	3223.33	15328.3	3599.33	3760.33	2897	3491	0	1582.33	4092	7557.33	23425.7	16431	21485	20855.7	10936.7	300	0	11684.7	8369.43	8340.67	0	0	186.667	3298	2512.33	0	1445.33	8866.33	35332.3	0	127	2466.33	681	330.667	11930.3	2442	33.3333	15338.3	38.6667	0	4668.47	0	0	0	44.6667	0	0	0
136	She_N_F10_02uM	0	4845	0	564.667	294.333	0	0	352.333	0	1313	5746.33	4814	0	608	0	617	8.33333	5593.67	1375.37	0	87.3333	442	0	0	0	93	130.333	420.667	666	93.3333	0	0	0	92.3333	0	972.333	10.6667	0	38.6667	0	152.333	269.667	0	36.3333	56	12.6667	0	0
137	She_N_F10_06uM	485.667	12759.3	957	2612	864	3551.67	0	2362	3817.33	6033.33	19985	27224.3	18967.3	3024.33	13882.7	1148.67	0	23448	7840.15	0	0	0	0	0	0	0	292	0	16060.7	0	0	0	0	0	0	0	0	3046.33	38.6667	0	971.883	0	0	0	0	0	0	0
138	She_N_F10_10uM	1459	17941	786	7754	454.667	4911.33	0	2400.33	1631.33	7662.33	26165.7	30982	11299.3	5431.67	11922	1393	0	33509.7	9205.74	0	0	0	116.667	20.6667	438	0	416	2582.33	18860.3	0	0	8	230.333	309	192.667	412	0	632	8.33333	0	1211.32	522.333	0	0	0	0	0	0
139	She_N_F10_20uM	2023.33	17752	551	2725	1986.33	6247.33	0	4353	3723.67	8747.33	29010	38622.7	23488	6547.67	18316	709.333	0	37232	11224.1	0	65.6667	0	262.333	0	1049.33	0	1082.33	1045.67	28912.7	0	0	166.333	363.333	208.333	231.333	152	0	6286.33	38.6667	69	1993.22	0	0	0	0	0	74	0
140	She_N_F10_60uM	555	10101.3	1283.67	4539.67	2322.33	4292.17	0	1048	1014.33	3466	19906.7	26852	16211	4101.67	7326.33	2190.17	867.667	24922	7277.78	0	4	293	0	0	38.8333	85	150.333	7581	9760.33	0	0	0	136	428.333	734.833	224	0	3963.67	38.6667	0	1171.9	0	0	204	13.3333	0	0	34.6667
141	She_N_F11_02uM	0	4711.67	579	819.667	639.667	260	57.6667	0	0	914	922.833	361.333	4816.33	671	0	438.333	0	689	882.25	310.333	38.3333	66	0	63	0	14.3333	97	0	160.667	44.3333	0	0	0	0	3.33333	0	0	295.833	38.6667	0	56.5917	0	0	84.3333	2	42.6667	49	0
142	She_N_F11_06uM	0	11594.3	467.333	4016.67	0	1027.67	0	75.6667	3254	4010.67	7964	6001.33	11000	3116	2008	187	0	5492.67	3345.3	843.667	71.6667	48.3333	77.3333	408.333	497	16.3333	14	2783	4358.33	0	0	375.333	0	61	1199.33	386.667	0	1869.67	35	0	652.25	978	0	0	7.66667	0	0	0
143	She_N_F11_10uM	0	14327	558.333	3947	346.667	1808.33	17.6667	0	118	5024.33	11910.7	9861	1908	10644	5560	0	0	2589.33	3812.24	2900.33	103.667	0	292	2106.33	0	34.3333	242.667	5645.33	16322	186	0	33	0	262.333	5352.67	0	0	4301	0	65.3333	1889.08	0	0	52	36.6667	0	0	0
144	She_N_F11_20uM	584.333	20857.7	499.333	3756.33	3240.33	1690	185.667	0	0	7808.33	22280.3	9378.67	14082	17305.3	3297	39.3333	0	10642	6424.81	6373.33	105.667	175.667	227	2301.67	465.333	54	597.667	6105.67	19293.3	324	0	0	193.333	321.333	7167.67	337.667	0	1856.67	38.6667	0	2296.93	0	0	168.667	35	0	0	0
145	She_N_F11_60uM	0	13930	625.333	4769.67	1736.33	4237	154.667	0	0	4184.33	23753.3	13178	12657.7	23795	6532.67	1502.67	0	14363.7	6967.8	13778.7	231.667	19.3333	416.667	6513.67	1035	87	735.333	19647.7	16010.7	324.667	307.667	449	379.333	1313.33	11575.7	1564.67	0	5611.67	38.6667	170	4002.02	0	9.66667	238	346.333	49	73	100
146	She_N_F12_02uM	0	19161.7	389.333	4344	0	455	0	255.333	0	4276	5804.67	8363.67	1460.33	240.667	10301.7	0	0	4270.33	3295.7	0	0	116.667	248.667	0	1247.67	2	0	0	659.667	188.333	0	225	0	68.6667	77.3333	572.667	0	2296	38.6667	0	287.067	1032	0	5	0	0	0	0
147	She_N_F13_02uM	57.3333	14372.3	166	4509.33	452.667	381.667	114	5942.33	0	4076.67	21634.7	16326	1838	7434.67	4898	0	609.667	11697	5250.57	922.667	0	569.333	56	3664	9	86.6667	622.333	22518	22576.7	276.333	0	46	102	217.667	3766	1607	0	4223.67	35.3333	0	3064.93	45.6667	0	93.6667	0	0	0	35.3333
148	She_N_F13_06uM	1162.33	15237.7	575	3243.67	1356	3167.67	0	0	554	4943	32637	19792.3	15278	21889.7	10944.7	931	0	17271.3	8276.85	12366.7	26	1	642.333	3583.33	837.667	197	785.667	16179.7	23279.3	0	22.6667	2277.67	340.667	373	8951	3063.67	0	3996	38.6667	0	3848.1	0	0	0	2	0	0	0
149	She_N_F13_10uM	1598.67	14295.3	1423	3775.67	1954.67	4688.33	0	1133.67	0	3940	31898	18646	11104	21610	10199	707.667	0	16842	7989.78	11073	0	0	477.333	6494	482.333	41	1062.33	14703.3	26632.7	241.333	0	1918.33	524.333	478	11866.7	2951.33	0	5761.67	3.33333	11	4235.55	908	0	0	73.3333	0	0	0.333333
150	She_N_F14_02uM	0	13701.3	488.333	1045	685	839.333	0	489.667	10.6667	2926	4670.67	15857.7	2861.33	186.333	16301.3	11.6667	0	2760.67	3490.83	0	104.333	0	283	0	0	0	2.33333	0	1732	173.667	0	19.6667	0	62.6667	429.333	0	0	355.333	6.66667	0	158.45	0	0	31.6667	0	0	0	0
151	She_N_F15_02uM	406.333	15968.7	549.333	4351.33	1234.67	5304.33	181.333	1674	0	7168.67	37226.7	14192.7	18769.7	17640.3	16719	0	0	11771.3	8508.8	11778	91	418.333	2321.67	2148.33	3639	28.3333	1050.67	17482.3	20917.7	324	0	1092.33	254.333	503.667	22148.7	1391	250.667	7523.33	0	0	4668.17	0	36.3333	153	93.3333	6	0	0
152	She_N_F15_06uM	1737	10726.7	932.667	5297	3182.67	8048.33	25	0	3005.67	6084.33	40464.7	19091.7	21483.7	22154	19889.7	1898	409	7353.33	9543.52	17211	110.333	123.667	5920.33	5047.33	2715.33	225.333	1258.67	43987	28595	16.6667	0	2062.33	292.667	1123.33	28742.3	11416.3	106	2851	796	96	7630.03	596	51.6667	220.667	120	0	0	0
153	She_N_F01_02uM	0	2556	621	263.667	798	245	140.333	0	0	229	909.333	180.333	817.333	174.5	0	0	0	1135.5	448.333	713.667	2	0	0	0	0	0	113.333	0	0	2.66667	0	0	0	0	0	0	0	248.667	0	0	54.0167	0	0	33.3333	15.3333	0	48.6667	0
154	She_N_F01_06uM	0	8710.33	300	0	0	0	0	0	0	0	2212	0	0	0	0	0	0	4688.67	883.944	0	0	22.6667	0	0	169.333	0	0	0	0	0	0	0	386	0	0	349	0	0	175	0	55.1	1133.33	0	0	0	0	0	0
155	She_N_F01_10uM	0	18421.7	1415	869	0	126.333	0	0	0	4393	9094	4621.33	16354.3	0	12456.3	0	0	12790.3	4474.52	0	33	0	322.333	9.66667	334	0	0	0	0	0	0	0	0	85	353.333	1147	0	1206	38.6667	25.3333	176.45	11.3333	0	4.33333	140.667	0	0	0
156	She_N_F02_02uM	248.667	11073.3	37	433	211	333	0	0	2.66667	3523.67	8554.67	0	1595.33	0	5944	0	0	1205.33	1842.31	52	73.6667	0	0	0	0	0	578	18.6667	321.333	0	0	0	0	0	221	214.667	96	0	38.6667	0	80.7	0	12	40	36.6667	0	0	0
157	She_N_F03_02uM	0	10506	0	0	0	0	0	0	0	932.333	6766.67	0	0	0	21.3333	0	0	2895	1173.41	0	0	0	0	0	569.667	0	1353	0	1228.33	0	0	0	34.6667	0	0	218	25.3333	0	78.6667	0	175.383	789.333	0	0	0	50.3333	0	0
158	She_N_F04_02uM	0	16556	446.333	933.667	0	40	0	0	4250.67	6646.33	2042.67	3370.67	1287.33	1318.33	12576	0	0	1300	2820.44	0	0	0	27	1774	48.3333	0	58	0	1626.33	0	0	7	0	51	1826	0	0	1738.67	38.6667	0	359.75	0	0	0	94.3333	0	0	0
159	She_N_F04_06uM	588.333	23133	140	3215.67	551.667	921.333	36	1045	8024	8783.67	4650	6862.33	143.333	5435.33	16092.3	382	53.3333	4070.67	4673.78	4001.33	58.3333	119	173.667	3183.67	2	52	652	2712.33	8189.67	0	0	0	253.667	174.667	13225.3	40	132	4525	38.6667	0	1876.67	0	37.6667	2	1294	4	0	0
160	She_N_F04_10uM	0	22144.7	451.667	4487.67	860	791.333	16.6667	0	100.333	9570.67	6019	6242.33	21701.3	5788	11798.3	517.333	198.667	3926	5256.33	8440.33	92.3333	0	795	6712.67	1793.33	16	956.667	5568.67	8076.67	143	0	1861.67	69.6667	606.333	12450	2052	59	3184.67	38.6667	50.3333	2645.83	0	0	72.3333	182	0	3	0
161	She_N_F05_02uM	0	16278.3	0	0	0	0	0	429	0	1197	10438	3837.33	1044.33	253	0	0	0	8952	2357.17	0	0	0	0	0	922.333	0	208.667	0	5350.33	0	9	0	205.333	0	0	573	69.6667	0	115	0	372.667	1109	0	0	0	17.3333	0	0
162	She_N_F05_06uM	124	20390	1833	4393.33	1474.33	3555.67	0	0	1261.67	10000	18765	7832.33	13607.3	11843.3	3684.67	32.3333	0	16647.3	6413.57	1865	130	0	1018.67	1852	1006.67	0	1438.67	6568	16759.3	199.667	0	1192.67	834	353.333	9064.33	6076.33	0	12073	51	445	3024.13	0	0	0	42	0	0	0
163	She_N_F06_02uM	0	11158.3	0	534	124.333	419.333	2.33333	0	1557.33	5714	3807.67	2691.33	0	838	5475.33	0	0	2851.67	1954.09	501.667	102	249.333	315	267.667	0	0	58	3219.33	1524.33	0	0	1015	0	245.667	6635.67	406.5	51.3333	0	38.6667	0	731.508	0	7	138.667	79.3333	0.666667	0	0
164	She_UN_F01_02uM	0	14809.3	407	1471	277	255	46.6667	0	0	1271.33	3842.67	5918	912.333	246.333	9950.33	0	0	2615	2334.56	0	98.6667	0	0	0	0	0	12.6667	0	0	0	0	102.667	0	55.6667	0	0	0	224.333	38.6667	0	26.6333	679.333	0	44	0	0	0	0
165	She_UN_F02_02uM	0	19666.7	1547.67	0	0	0	0	0	645.667	5453	14938.3	24798	2031	2083.67	10049.7	1480.67	0	26282.3	6054.26	0	29	6.66667	0	0	1699	0	0	0	314.667	0	0	46.3333	6	20.3333	0	567.667	0	0	139.667	0	141.467	967	0	48.3333	0	0	5.33333	0
166	She_A_F08_06uM	0	18133.3	2775.67	3465	143.667	5970	0	4167.33	6593.33	7769.33	20682.3	35921.3	30702.3	4934.67	14260	1872	0	36013	10744.6	0	70	0	0	0	637	0	0	0	4870.33	89.3333	0	49.3333	329.333	651	223.333	0	0	758	38.6667	15	385.817	0	0	30	0	0	96	0
167	She_A_F08_10uM	266.333	16045	372.333	3139	526	3469.67	34.3333	894.333	36	5284	17727.7	31311.7	2504.33	4490.33	15075	2095	233.333	31560.3	7503.59	0	167.333	471.333	0	0	654	0	0	0	2048.33	0	0	0	115.333	448.333	0	1247	0	23.6667	33	0	260.417	0	0	53.6667	0	0	6	0
168	She_A_F08_20uM	0	12623.7	2064.67	4046.33	1078.67	4979.67	0	564.667	0	3830.67	17771.3	33975.3	25445.3	5238.67	15317	1172.33	12	28938.7	8725.5	0	111	0	0	0	539.333	0	0	0	1930.33	69	0	229	90.3333	232	0	533	0	1626.33	97.3333	0	272.883	769.333	0	24.6667	0	0	0	0
169	She_A_F08_60uM	0	14284.7	1179.67	5570.67	700.333	8413.67	0	454.667	20.3333	2805	20923.3	35942.7	22080.7	5180.67	10217	2327.33	0	36738.3	9268.83	0	44.6667	0	0	7.33333	1228	0	0	0	1048	61.3333	0	31	329.333	329.333	64.6667	643	0	1885.67	0	12.3333	283.617	986.667	0	0	0	0	123	0
170	Shw_F01_2uM	47.3333	155.333	383.333	237	1398.67	433.667	0	1352.67	0	44.6667	0	497.333	0	0	0	378	893	0	323.389	0	237.667	0	0	28.6667	0	48.6667	0	0	0	405	0	129.333	0	0	0	209.333	0	0	0	0	52.9333	411	0	53.3333	0	0	0	0
171	Shw_F02_2uM	0	10.3333	544.667	413	189	0	0	0	0	144.667	0	0	0	201.667	0	1276.67	540.667	0	184.481	0	0	218.667	95.3333	5	0	102.333	0	0	117.667	0	0	59	0	0	0	328.667	127	80	38.6667	0	58.6167	329	0	42	0	18	0	0
172	Shw_F03_2uM	20580.3	28457.3	2038.33	18541.7	2515	9249.33	155.333	19107	25835.7	22657.3	33550	30475	22140.7	587	33431.7	5318.33	9924.67	29875.7	17468.9	5185.67	589.333	497.667	15144.3	6358.67	6206	7845	2056	9466.67	17805	251.667	849	13786.3	80.6667	2134.33	22161.3	13595	2070	16900.3	1239.67	534.667	7211.13	409	2725.33	103.667	95.6667	31	0	2.33333
173	Smc_F01_02uM	104.667	5.33333	399.333	63.3333	862.333	970	293	1156.67	110.333	0	0	0	0	5	0	1043	549	0	309	0	290	0	471.667	168	2397.33	1283	1919	162.667	1759.33	465.333	110.667	1384.33	2819	36.3333	329.333	838.333	72.3333	11624.3	0	0	1306.55	0	0	0	0	0	0	6
174	Smc_F02_02uM	10909.3	5672.67	1307.33	6374.33	3025.67	14890.7	619.333	5817.67	20949.7	5701.33	32270.3	29392	6742.67	4289	30219.3	13981.2	9505.67	15588	12069.8	17892.3	428.667	215	15261.5	10213	6891	10090.7	2644	12178.5	36468.3	1269.33	278	8948.67	1080.67	5900.33	32051.3	19184	2362	20132	695.667	294	10209.2	0	503	284	295	204.333	0	0
175	Smc_F03_02uM	15716.7	7894	6598.67	22618.2	6114.33	27380	679.667	12426.7	24197	8760	33246.3	41096.3	26889.3	6963.67	30266.3	24386.3	12708.7	7096	17502.1	21822.3	276	788.333	26468.7	8657	19176	7839.33	2939	37062	33358.7	491.333	106.667	18047	987.333	8408.67	55561.3	28186.3	1551.83	18908.3	5076.67	793.667	14785.6	369.167	608	286.667	424.667	232	21	25.3333
176	Smc_F04_02uM	14393.3	8370.33	3032.33	13524.3	1849	11528.3	0	7601.33	24914.7	3946.33	26357.3	26184	21268	769.667	25380.7	17689	14907.7	14668.3	13132.5	8054	126	114.333	15103	2775.33	8340.33	1039.33	1258.33	38452	17666.3	586.333	87.3333	19282.7	477.333	917	40040.3	14552	911.667	4693	3353	263	8891.48	1191.33	227.333	102.667	292.667	130	0	16.3333
177	Smc_F05_02uM	10026.7	5845.67	5356	15841.7	2016	26077.7	507.333	10097.7	22680.3	10187.3	27807.3	29590	39968	8052	36955	23473	11299.3	11892.7	16537.4	13876.3	323.667	68.6667	17237.3	9079.67	8590.67	11309.7	1822	43107.7	33261.3	392	0	18764.3	303.333	4850.33	36989	27752	1521.67	19512.3	995.667	587.667	12487.9	33.3333	653.667	318.333	555.333	96	0	2.33333
178	Smc_F06_02uM	16981	12018.7	8880.67	23402.3	3494.67	20721.3	1959.67	8628.33	21659	7803.33	36875.7	36238.3	36683.3	3733.33	43408	30826.3	14070	18956	19241.1	14861.3	528.667	1670.33	36032.7	13564.3	16391.3	11260.7	3659.33	44175.3	28437.3	745.667	140.667	14834.3	1104	9448.67	55743	29909	1359	16526.7	11030.7	1452.67	15571.1	1475	456.333	142	1044	240	11	48.6667
179	Smc_F07_02uM	11433.3	14415	6524	25092.3	3412	18935.3	2247.67	5741.33	23496.3	5776	27890.7	32397.3	35013	3802.33	35913	30167.7	17417.7	16816.3	17582.9	11470.3	331.667	1697	34936	11141.7	16046.7	8262.67	2544.33	49622.7	30355	538.667	0	36009	872.667	7406	49207.7	26282.7	1199.67	19308.7	6038	1217	15663.6	781	67.3333	509	639	221	0	36.6667
180	Smc_F07_06uM	14874.7	10650	6457.33	24760.7	3131.67	24834.7	1490	13239.3	25107.3	7209	32369.7	38602	39839.3	4748.33	47155.7	30370.7	16975.7	11931.3	19652.6	16791.3	186.667	592.667	35738.7	15880	16615.7	11399.7	3408	36446	27165.7	776	0	52934.7	597.333	10238.3	62954.3	33387	726	15058.7	12208.7	1295	17655.3	592.333	257	310.667	473	155	0	24.6667
181	Smc_F08_02uM	16329	15062	8325.67	23293.3	3094.67	24620.3	1954.67	14238	24707	5576.33	35950.3	37004.7	39078.3	4971	42489	32344.7	24741.3	22382.3	20897.9	17151	362.667	1613	37110.7	12524.7	14119.7	13431.7	3723	44321.7	28200.7	729.333	153.667	18263.3	849.333	8785.33	60016.3	30402.7	1592.33	27464.3	13341	1776.67	16707.8	1466.67	457	355	905	226	0	40.6667
182	Smc_F08_06uM	17514	14076.7	10657.7	28170.3	3625.33	31367.7	3511.33	17688.7	27131	12175	39203	37994.3	36556	5329.67	38215	31219	22767	19268.7	22026.1	16181	308.333	1103.67	27555	14650.7	15520.3	17602.7	3016.33	54564.3	34486	629.333	0	35432.3	632.667	8756.33	56759.7	35273	1714.67	22848.3	5799.33	1163	17641.7	681.333	293.333	657.333	705	220.333	0	18.3333
183	Smc_F09_02uM	19343.7	15238	9562.33	26069.3	4035	26337.3	2554.33	13304	20950	10736.7	40525	33698.3	39910.7	5633.67	46087	30380	19043.3	23339	21486	19558	406	1121	34850	17423.3	16908.3	13655.3	4062.33	34742.7	28249.3	590.333	0	21394	652.667	12844.7	47062.7	40026	1483.67	26176.7	11196.7	1761	16620.2	564	247.667	512.333	590	166.333	0	17.3333
184	Smc_F10_02uM	12956	18167	8220.67	20289.3	3472	20032.7	5183	7140	22003.7	8586.67	34712.7	23062	35333.3	5379.67	39511	29557.7	27153.7	21525.7	19015.9	12424.7	463.667	4780.5	35825.7	19631.7	14053.3	17071.7	3705.67	58776.7	27259.7	1571	0	34947.7	690.667	13227.7	45358.7	34889	1233.33	20078.3	8557.33	1660	17727.3	343.333	0	676	718.333	232	0	22
185	Sme_HFa_F01_02uM	777.333	4217.33	4784	0	985.667	8162.67	12.3333	3603	0	951.333	22571.3	34419	17289.3	7456.33	8564	4544	941.667	27713.7	8166.28	0	149.667	266.333	0	135	0	271	521.333	407.667	2853.67	502.667	0	390	526.667	2205.33	0	2040	0	21137.7	37.3333	1171.33	1572.22	704.667	0	105	30.6667	0	164	65.6667
186	Sme_HFa_F01_06uM	2817.33	4240.67	7044.33	0	1613.33	7539.67	0	6236.33	0	1264	27921.7	41267	16627	9094.33	15326.3	4201.67	789	33213.7	9955.35	3660.33	0	430.333	0	282.333	3642	3584	1131	0	3999.67	0	0	167.667	1207	2189.67	308.333	3087.67	40.3333	20654.3	234.667	3453	2230.97	0	0	227	157.667	137.667	189	0
187	Sme_HFa_F01_10uM	2674.67	4208	6677.67	0	597.333	6383.33	0	4727.67	0	442.333	21534.3	34664.7	12550.3	4491.67	8474.33	4171.67	1013.33	30031.3	7924.59	2029	0	215	0	198	2122.67	3074.33	1397.67	0	2934	0	681.667	0	152	2505.67	88.3333	690	0	23377.7	45.3333	3560.33	1975.57	0	0	0	0	70.3333	158	0
188	Sme_HFn_F01_02uM	265	0	127.667	0	0	0	370.667	842.333	105.667	0	303.333	1734.33	0	1171	0	1783.33	514.667	0	401	0	40	101.333	318.667	0	0	183.333	0	0	71.6667	438.667	1907.67	668	100.333	0	0	581.333	0	0	0	235	220.55	0	0	0	86	117	0	0
189	Sme_HFn_F01_20uM	0	83	463.333	0	0	781.333	211.667	0	0	0	0	0	0	34.6667	0	489	0	0	114.611	0	153.333	153.667	255.333	35.3333	0	52.3333	0	0	71	409.333	0	198.667	39.3333	63	0	859.667	0	0	0	104	114.55	757	0	82.3333	0	5.33333	0	0
190	Sme_HFn_F02_02uM	324.667	674	2983.33	0	0	569.667	275.667	1075	72.6667	453.667	0	2969.33	581	484.333	5266.67	1605	504.333	764.667	1033.56	8616.33	251	147.333	684	6915.33	9745.33	182.333	619.667	379.667	15102.3	639.333	11613.3	1163.67	1504.33	1525	9589	5884.33	651	29809.3	42.6667	1356	5253.27	501.333	0	162.667	6040.33	106	14.6667	33
191	Sme_HFn_F02_06uM	0	2400.67	6178.67	0	0	1584	628.667	6747.67	3766.67	1468.33	415.333	4092	2305.33	1435	13419.7	2192.67	636.333	2248.67	2751.09	17153.3	828.667	145	53	15566.3	6070.67	1974.33	1066.67	4829.67	13868.7	0	14713.3	1709.67	1577.67	3039	8189	4557	872	27563.7	312.667	2521.33	6204.52	38.6667	0	93	7285.67	534.333	80	81.3333
192	Sme_HFn_F02_10uM	330	3101.67	6878.67	1018.67	0	4211.67	248.333	8467.33	4338	3712.33	1243.67	3513.67	5180.33	1504.67	11685.7	2706.33	266.333	2923.67	3407.28	18907.7	728.333	135.333	359	14508.3	9724	2348.67	1287	4899.67	15574.3	0	19669	1703	1671.67	2470.33	6908	6934	533.333	30560.3	60	2480.67	6949.1	0	0	252	7427.33	643	93.6667	126.333
193	Sme_HFn_F03_02uM	0	329	3387	0	0	0	0	5302.33	0	0	0	1401.67	1088.33	357.667	6397.67	1036.67	0	437	1096.52	13392.7	109	98.6667	267.667	8081	0	250.667	190.333	1202.67	5902	0	7616.67	1002.33	645.667	2591	8251	2715	0	18818	0	2486.67	3556.72	165.333	0	234.333	759	62.3333	0	249.333
194	Sme_HFn_F04_02uM	277	0	3683.67	0	0	0	201.667	718	0	0	70.3333	1689	770.333	163.667	44.3333	866.667	354	72.6667	495.074	13063.3	264	116.333	478	7305.67	8799.67	203	189.667	564.667	10109	451.333	2654	1224	290.333	1325.33	7932.67	3819	10.6667	21547.7	55.3333	369.333	4020.18	140	0	74.6667	10476	0	0	0
195	Sme_HFn_F04_06uM	812.333	328.333	1925	202	0	507.167	0	2010.67	2278	0	0	5522.33	849.667	1135	8686	3694.67	2724.67	394.667	1726.14	17412.7	231	245.667	324.5	9167.5	7568.67	1639	376.667	3895	16102	0	2410.67	1249.33	873	2711.33	8935.83	2750.67	0	34778.7	257.333	2745	5546.48	90	0	22	6790	37	0	94.3333
196	Sme_HFn_F04_10uM	0	80.6667	3998.33	0	0	866.667	0	4315	240	0	0	4063.33	532.667	202.333	0	0	1381.33	0	871.13	11646.7	348	165	0	8439.33	0	304	166	4177.33	7654	0	1133	1723	773	2241	9166.67	3038	0	28676	45	1399.67	3984.8	899	0	1020.67	9031.67	32.6667	0	10.6667
197	Sme_HFn_F05_02uM	1556.67	1137.67	4315.67	1154.17	526.667	380.667	1009.33	3956	4462	724	0	6698.33	2859.33	906.333	3654.67	527	335	0	1900.19	12115	802.667	108	0	9634.67	7964.67	2556.33	554.333	3427.33	10394	6.33333	6229.33	1999.33	1306.33	1165	4502.67	2168.33	0	12458	16	1552	3870.42	33	0	443	5601.33	158	27	0
198	Sme_HFn_F06_02uM	174	0	5564.33	0	0	0	0	1297.33	199.333	0	184	5350	0	440	1022	0	0	0	790.611	5550	53	0	0	14416.3	8738.33	1403	373	3529.67	12862.7	0	1419	898.667	794.667	2035.67	10372.7	3344	48	27619.7	57.6667	2971.33	4675.8	300.667	0	151	11118.7	3	0	0
199	Sme_HFn_F07_02uM	801	322.333	1837.67	950.667	0	3803.67	0	0	8833.33	717.667	338.333	3883.33	2356	145	1428.67	3044.33	1454.33	0	1662.02	8178.33	0	151	0	8822.67	4091.67	125.333	101.333	3099	5397.67	0	773.333	489.667	278.333	1431.67	9042	3392.67	0	21292.7	197.333	1279.33	3343.23	8.66667	0	0	5619	0	0	0
200	Sme_HFn_F08_02uM	0	396	1694.67	0	0	0	0	11264.3	528.667	313	0	3959	1407.33	286	9356.67	0	0	0	1622.54	3163.33	298.667	256.667	0	9156	9225	3875	107	91	3793	0	4498.5	1869.67	312	1672	5223	4302.33	2371	5942	21.6667	2578.33	2808.89	390.333	0	40.3333	8145	70	0	19.3333
201	Sme_HFn_F09_02uM	0	0	0	0	0	0	0	5210.33	0	0	0	2751	872.667	120.333	942.667	0	0	0	549.833	0	113	335	0	19	0	521	554.667	0	72	0	1146.67	265.333	237.333	0	63.3333	1514.67	241.667	0	12.6667	2207	254.817	822.333	0	196	23.6667	2.33333	0	0
202	Sme_HFn_F09_06uM	325.333	0	4835	0	0	0	304	7474.67	734.667	0	0	4841.33	272.667	393	5670	0	0	5922.33	1709.61	7088.67	833.667	0	0	164	6048	2308.67	2657	0	993	0	9995	39.6667	1215.33	498.667	1272.33	1883.33	0	844	36	2085	1793.87	271.333	0	636.333	125.333	204.333	55.6667	0
203	Sme_HFn_F10_02uM	0	1102.67	6269	0	0	0	66.6667	22904	781.333	0	0	1950.67	1762.67	1690.67	14626	172.333	0	793.667	2895.54	10528	871.667	295.333	28.3333	10322	8585.67	4558.67	534.667	109	10558	530.667	12047	386	801	1987.67	6198.67	2609.67	4056.67	16214.7	243.667	1789.67	4573.35	67.3333	43.6667	110	13344	254.333	89.6667	62.3333
204	Sme_HFn_F10_06uM	286.333	70.6667	127	0	0	0	213.333	0	96	196	0	1444	0	714.333	0	1239.67	0	0	243.741	0	149.667	211	0	0	0	121.667	0	0	0	49.3333	1891.33	896	391	20	33	1014.33	0	5	23.6667	144	240.3	241.667	0	39.6667	46	181	0	0
205	Sme_HFn_F11_02uM	0	455	263.333	0	0	1823.67	0	0	730.667	879.333	366.333	1902.33	0	160	1191.67	0	0	0	431.796	6194	0	134.667	0	4330.33	2307.67	169.667	86.6667	185.333	2746.67	0	0	338.333	266.667	521.333	8351.67	0	323.667	9045.33	38.6667	0	1752.03	278.333	0	0	749.333	23	0	0
206	Sme_A_F01_02uM	21552	7317.67	6559.67	18163.7	9654.67	24944	751.667	11067	15344.3	7193.67	34889	22681	30925.7	7196.67	45455	28930	32324	18535.3	19082.5	30748	529.333	999.333	22190.3	5131.33	11389.8	10435	2500	55831.7	29191.7	743	0	30606.3	843.333	7236	52844.3	28234.3	2067.67	30323.7	9610	1754	16572.8	602.333	789.667	1250.67	420.333	452.667	4.66667	103
207	Sme_A_F02_02uM	1478	1543.33	576.333	2503	1227.67	4045.33	495.667	106.667	12722.3	2105	2942	9056.33	6070	568.333	19354	5643.33	5503.67	4398	4463.28	1161.33	2524	449	14217.7	1369.67	8163.33	6590.33	3910	34398.3	19534.7	328	3449.33	3739.67	9034.33	15456.7	32167.7	10042	485	11493.3	5947.67	1520	9223.1	245	0	9.66667	348	583.333	0	3.33333
208	Sme_A_F02_06uM	1606	1350.67	1370	4003.67	289.667	5724.67	0	826	18941.7	2860.67	4572	7658.33	12304	1128.33	19535	7599.67	5017	3805	5477.35	1302.67	6374.67	323.667	11203.3	3075.33	14056.7	11101	5203.67	29017.3	19123.3	634.667	7473.33	10436.7	9254.67	18083	28527	13885.3	488.667	20255.3	2547.33	1472.33	10618.4	174.333	17.6667	102.333	390.667	742.667	0	0
209	Sme_A_F03_02uM	1185.33	835	247.667	0	913.333	1127.67	460	390	214	843.333	673.333	1380	1402.33	354.667	403	1819.33	1326.33	697.333	792.926	0	351.333	240.667	6022	78.3333	2000.67	588.333	1690.33	21314	7228.67	328	1108	1803	2443.33	12200.7	20721	7359.67	731.333	9101.33	588.333	232.333	4794.95	197	41	40.3333	52.3333	54.6667	0	0
210	Sme_A_F03_06uM	2217	751.667	801	819	2303	1384.33	269	191	2263.33	2184	1196.33	2894.33	2978.33	656	10465.7	2699.67	2931.33	2168.67	2176.31	0	3174.67	0	6441.33	2543.67	8320	9381.33	3746.33	27151.7	15738	393.667	1611.67	4815.33	7676.33	13159	25732.7	12737.3	329.333	14132.3	1032.33	349.333	7905.85	156	0	0	167.667	205	0	0
211	Sme_A_F03_10uM	1234	1114.33	1455	1512.67	0	3746.67	0	1948.33	16005.7	4177	3965	7934.33	9741.33	1922.33	32217.3	8049	4694.67	4812.33	5807.22	0	4561.67	380	11711.7	2355	0	4746	5117.33	38851.3	22012.7	639	10771	11442.3	7712.67	13830	38248.7	14694.7	0	21423	1706.67	1355.33	10510.2	586.667	39.6667	44	542.667	579	0	30.6667
212	Sme_A_F04_02uM	1636.67	605	0	1111	4442.33	1746.33	209.333	201.333	0	1382.67	605.667	1117.33	77.6667	7.66667	0	141.333	181	0	748.074	0	3	0	733.667	70.3333	0	501.667	173.333	4323.67	915.667	0	0	608	123.333	204.667	7509.33	10094.7	0	581	0	157.333	1292.12	593.333	0	215	99	0	0	0
213	Sme_A_F04_06uM	6364	1006.33	2565.67	4268.67	4910.33	1480	521	0	105.667	1939	977.833	4322	4076.67	559.667	4741.67	3387.33	207.667	0	2301.86	680.667	174.333	0	2299	44.6667	6066	176.333	1336.67	7496.33	4114.33	365.667	971.667	3418.33	2026.67	2869.67	22672	4765.67	0	5568	385.333	1075	3271.57	0	0	160.333	183.667	132.333	14	40.3333
214	Sme_A_F04_10uM	2050.67	607	611.667	3313	5827	2648.67	2438	751.333	4594.33	2208	1649.33	2817.33	3068.33	24.6667	8577	1923.17	6636.67	2442.33	2899.36	0	2196.33	346	4518.5	2665	1788	6300.67	1607	30704	6913	383.667	1609.33	581	5744.33	21531.3	6206.33	6690.67	77.6667	14108.7	291.333	571	5713.14	0	0	99.3333	26.6667	12.6667	74	4.66667
215	Sme_A_F04_20uM	1248.33	519.333	938.333	1144.67	2718	778.667	482.667	178.667	1893.67	2384.33	786	1426.67	3033.33	679.667	6051.33	1746	1533.67	1599.67	1619.06	0	842.667	121.667	3245	3841.33	4400.67	8930	3771	22421	8320.67	676.667	3461.67	4343	6810	21205.7	10615.3	11967.7	645.667	9664.67	196	1526.67	6274.02	87	11.6667	10.3333	20	115.333	0	0
216	Sme_A_F05_02uM	3125.33	1532.67	1785.33	2628.33	0	4052.67	136.667	2091.67	15338.7	4011.67	5930	7685.67	14012.3	2724.33	26528.7	6032.67	5384.33	4463.33	5970.24	0	4609.67	459	10946.7	3158	0	6898.33	6098	38950.3	22639.7	467	13335.3	18693.3	12100	20741	38307.3	14484	0	21118	1820.33	1013	11741.3	802.667	25	62	707.667	449.667	0	51.3333
217	Sme_A_F05_06uM	2909.67	5159	4105.33	17740.7	4682.33	21169.7	509.667	3411.33	13715.7	12608	23798.3	8388	29790.3	1504	31829.7	15341	15235.7	8520.67	12245.5	8706	882.667	372	15404.7	3211.33	16824	4960.67	5619	39849.7	23751.3	297.333	4391.33	28111.7	4315	13166.7	44677.7	14705.3	844.333	24038.3	4440	581.333	12928.5	348	1080.33	207	421	375.667	0	122.667
218	Sme_A_F05_10uM	9941.67	6310.33	7141.33	18960.3	2693	16915.3	610.667	4241.33	26913	12211.7	23516.7	9256.33	33349	3332.33	30381.3	20409.7	23478	14740	14689	8854.33	2842.67	1452.5	21008.7	5945.33	14874.3	9556.33	4923.33	47555.3	31411	549	7200.33	8043	4836	15929.7	50025.7	15224	1545.67	20159.3	4175	1302.33	13805.6	514.667	708.333	124.667	1261.67	853.333	0	155.667
219	Sme_A_F06_02uM	12427.7	6247.67	6921.67	17607.3	4258	18630.7	501.667	6892	24453.7	13192.3	24019	9608.33	30674	3688	33704.7	15647.3	17138.7	15611.3	14512.4	8144.67	1273.67	1430	17090.7	4757.67	14893.7	10360.3	5251.67	39107.7	29153.7	620	5730	7378.67	4703	14732.3	50566.3	18904	798.667	22312.7	4162	1090.33	13068.6	624.333	934.667	84	832.667	831.667	8.33333	64.3333
220	Sme_A_F06_20uM	4858.33	1093	1782.33	2765.33	3834.67	6155.33	146.667	601.333	15573.3	4599.33	4547.33	7614	21485.3	1233.33	15749.3	6265.67	2836	4664	5878.04	2874	381.333	0	9381.67	410.667	18414.3	7320	2241.33	30834.3	14335	407.333	2724.5	11776.7	3522.67	5809	47807.7	12001	0	30501.7	5711.33	1136	10322.7	0	65.6667	107.667	208.333	210	16.6667	0
221	Sme_A_F07_02uM	1187.33	763.333	981.667	603.667	1472.33	3583.33	262.333	1579	10295.3	1977.33	4662.67	6465	5947.33	896.333	18954	4718.33	4187.33	3704.33	4013.39	2891.67	4919	0	12466.7	1743.67	16236	10252.7	4654	41747.7	19950	622	10051	11092	9957.67	16365.7	41101.3	15425	0	21160.7	2216.33	1435	12142.6	0	1	63.3333	356.667	395	0	0
222	Sme_A_F07_06uM	4703	921.667	1277.67	742.667	1098	3522	0	418.333	17140	2228	5755	9404.67	8692	1612	24172	6443.67	5202	2979	5350.65	957.333	5232.67	73.3333	12480.7	2653	18186	10750.3	6846.33	38428	18242	145.333	9020.67	2357.67	12221.3	22706.7	40073.7	11820	0	21894.7	5780.33	2328.33	11993.5	0	107	0	578.667	907.333	0	0
223	Sme_A_F08_02uM	13806.3	6670.33	11718	9474.67	6144	18404.7	427.667	13545.7	19497.3	9691.67	36190	18739	18505.3	5486.33	32398.7	25180.7	27565	17155.3	16144.5	26730.3	305	222.333	19449.7	4819	13734.7	9328.67	2729.33	51739.3	26756.7	451.333	190.667	32628.7	165.333	7558.67	43277.7	16106.7	1674.67	10819	8010.33	978.333	13834.9	14.6667	1111.67	605.333	160	211.667	78.3333	43
224	Sme_A_F09_02uM	1383	1130.33	1120.33	2477.67	2260.33	3513	228.333	1492.33	11557.3	2442	4909.33	5853	11204	1036	24334	3297.67	3262.67	4905.33	4800.37	684.667	3389.33	174.333	12333.3	1287	12069	4957.33	3583	43068.7	17461.3	285	8936.67	12396.7	6871.67	16478.3	32982.3	9991.33	161.667	13529.3	1578.67	500.667	10111	368	0	92	490.333	304.667	0	60
225	Sme_A_F09_06uM	5008.67	1111.67	1813	2302.33	333	4361.67	257.667	789.333	19024.7	4763.33	8228	8650	13665.7	2860.33	38242.3	7209.67	7940.67	4442	7278	93	5711.67	482.333	14587.7	2926.67	21772.7	11036.7	6608.33	41408	22869.7	202.667	10947.3	17497.7	12160.3	17092	47767.7	14374.3	0	26780.3	5715	2238	14001.7	45.6667	161	0	704.667	655.667	0	22
226	Sme_A_F10_02uM	1204	1074	666.667	2390	1769.33	2986.33	43	0	13227	2052.33	4346.33	6748.33	4273	476.333	18932	3629	5839	3765.33	4079	707.333	2683.33	1121.33	13232	632	9929	7916.33	3214.67	36152.3	16088.7	598	5366.67	3059.33	7227.67	12885	44492.3	7805.33	137	19751.7	3896.67	781.667	9844.83	534.667	0.333333	0	438	415	0	0
227	Sme_A_F10_06uM	1624.67	1178.67	936.667	2357	1654.33	3759.67	0	1091.67	13620.3	3358.33	8664.33	5436.67	12644	2056	25353.7	4445.33	5330.67	4228.33	5430.02	1951.33	3968.67	46.3333	12588.7	2111.67	18738.7	6967.33	6306.33	41280	18868	346.333	9504.67	13086.3	9862.67	19597.3	41270.7	15079.3	0	21500.3	2672	917	12287.3	213.333	143.667	59	491.333	302	0	0
228	Sme_A_F10_10uM	2350.33	846.667	695.667	3446	2340.67	4804.33	48.3333	2174.33	14947.7	2480.67	7130	7356	11249.7	1463.33	25371.7	5176.33	5111.67	4776.33	5653.87	282	3839.67	165.333	9314.33	2205.33	13028.7	7974	5554.33	33904.3	21847.3	189.667	9762.5	9261.67	10700.3	18838.3	41642.7	15069.7	36	20104.3	1657.33	1385	11268.9	52	66.6667	74	496	662.667	0	27.6667
229	Sme_A_F11_02uM	10202.7	2409	5561	10408	3905.67	9751.67	1040	3709	23268.3	6480	16230.3	13637	19468.3	3289.33	46360	10909	15543.7	6173.67	11574.8	7010	3392.33	822.333	20900.3	3795.33	13360.7	13047.7	3096.33	54051.7	34735.7	616	3416.33	23761	4653.67	16216	45168.7	13063.3	772.333	29517.3	6744	1206	14907	363.333	192.667	256	958.333	932.333	0	317
230	Sme_N_F01_02uM	1835	8742.67	3397.67	7762.67	2345.33	4250	0	4132.33	1241	1085	6151.33	25529	18658	3149	8299.67	3555	1040.67	6477	5980.63	3624.33	0	73.3333	0	99	1758.33	278.667	572.333	0	1196	0	0	1746	574	2155	146	677	19.3333	23104.7	38.6667	799.333	1803.13	104.667	7.5	65.6667	158	61.3333	0	0
231	Sme_N_F02_02uM	279	0	730.667	1383.67	1179.67	2465.67	255.667	1083.33	386.667	358	281.333	1081	227	105	1544.67	1274	514.667	0	730.556	644.333	199.333	0	971.333	182	3261.33	1212	1878.67	6639.67	2319.33	522.667	0	1358.67	3738.67	207	903.333	2544	69	32868.3	106.667	149.667	2981.32	20.6667	0	0	50	2.66667	0	0
232	Sme_N_F02_06uM	147.333	1233	289	2174.67	851	4703.33	0	1205	2791.33	985.333	1013.33	4231.33	5458	101.667	12430.7	771.333	775.667	2024.67	2288.15	0	277	22	4243.67	173.667	10852.3	9360.33	6261.67	35638	5919.67	490.667	0	8856	8603.67	770	16379.7	7513.67	360.333	19247.3	328.333	0	6764.9	779.333	0	77.3333	13.6667	0	0	0
233	Sme_N_F03_02uM	25837	13462.3	12722	24705	5217.67	23703.3	559.667	21063.7	18359.7	12090.7	26884	34273.3	33499.3	461.667	24110.7	16242.3	6860.33	17429.3	17637.9	19744.7	1247.33	883.333	10873.3	7183.67	14979	6560	3843.33	20216	13301.7	540	193	18899	1903.67	3104.67	34117.3	21032.3	1166	9247	3703.33	516.333	9636.93	499.333	1140.33	111.333	212	44	0	0
234	Sme_N_F03_06uM	24589.7	18130	12572	22253.3	6806.67	21907.7	153	23998.3	36789.7	18855.7	38612	42722.7	37809	726.333	30260	30172.7	29385.7	32411.7	23786.4	23770	2566.33	1043	22781.7	9938	17842.7	10111.3	5559.67	35196.7	21822.7	880.667	906	13482.7	2268	3394.67	43623.7	24973.7	3630	20707.7	6168.67	629.667	13533.4	1864.67	3972.67	0	1045	194	0	0
235	Sme_N_F04_02uM	16801.3	5877.67	6321	8670.33	5482.33	21954	534.333	14697.3	19489.3	13292.3	33821.7	24585.3	29623.7	8767.33	37631	21870	20159	12371.7	16775	17564.3	383	323.667	10040	6652.67	11704.3	10440.3	1683	42709.3	33504.3	714.667	531.333	20664.7	857.667	7612.33	56593	28115.3	1391.33	25535.3	2138	718	13957.9	416.333	746.333	1074.67	556.333	302	13	118.333
236	Sme_N_F04_10uM	17931.3	7131	7393.33	13891.7	7818.33	25511	382	17237.7	25036	13327.7	41118	33306.3	29018.7	11525	52018	27991.3	25913	18518	20837.1	37221.7	742	1020	26782.7	8884.67	0	14119	2163.33	54080.3	34871	558.333	0	28862	1348	9924.67	58908.3	30374	2712.67	24173.7	8202.33	2941	17247.4	692.667	1108.33	1637.33	701	798.667	8.33333	74.3333
237	Sme_N_F05_02uM	329.667	505.667	203	0	381.667	0	8.66667	635	262.333	887	425.667	1325.33	0	532	161	1754.67	791	88.6667	460.63	0	116	161.333	242	54	0	175	25.6667	0	0	0	0	636	0	24.6667	110.667	468.667	473	0	21	232	125.4	590.667	0	149.333	0	0	10.6667	0
238	Sme_N_F05_60uM	18446.3	8321.33	6992.33	19360.7	8559.67	21805.3	558	11562.3	29665	9578.67	37591.3	25969.3	29948	6975.33	46713.7	30393	26641	19211	19905.1	35722	391	909	23117	6215.67	8699.33	7057.33	1501.33	57272.3	25059.7	564.333	585	12262.3	628.667	7974.67	50791	20763.7	2062.33	24126.3	8413.67	915.667	14705.8	175.667	809.667	452	619	418.333	0	0
239	Sme_N_F06_02uM	13794.7	5507.67	7511	12373.3	4373.67	23971.7	465.667	11906.3	7604.67	2764.67	16900.3	23287.7	27722.3	571	17515.3	7271.67	29911.7	7267.67	12262.3	10454.3	375	63.3333	9749	1176	3856.33	213.333	732.667	18878.5	16033.3	347	0	4516.67	862.333	231.833	34781.8	8291	1213.33	16107	3728	147.5	6580.54	0	73	237.667	177.667	113.667	0	0
240	Sme_N_F06_06uM	14263	9117	5656	20242.3	7663.33	27638.7	373.667	12310.3	15805.7	19964.3	30857.3	25123.3	29308.7	986.333	26063.7	16148.7	13143	30674	16963.3	12963	358	31	10147.7	5117.33	10258.3	484	2044	32222	25203	516	1114	13576.7	886.667	1192.33	40215.3	14707.3	1774.67	20115	4800.33	1234.67	9886.33	0	520	144.333	147.333	49	0	47.6667
241	Sme_N_F06_10uM	29519	14520.3	7119.33	34615.7	14067.7	29907	971.333	17096.7	30860.3	20943.3	44007	37480.3	40633.7	1572.67	33627.3	25575.7	37145.3	33149.7	25156.2	31112.7	451	1384	11405	5928	24545.3	6759	3556	48202.3	27997	123.667	1693	27047.3	1324.33	3170.33	55555.3	28429.7	3134.67	40511.7	11254.3	787.667	16679.2	124.333	2127	90.3333	470.333	29.6667	0	0
242	Sme_N_F06_20uM	26503.7	14521	8752.67	30258.7	8187.33	34041.7	618	22791.7	32801.3	16022	37591.7	37752	38336.3	1984	31133.3	31423.3	36324	28918	24331.1	23295.7	250.333	376	16774.7	8119	20170.3	7757.67	3865.67	49931.3	21663.7	586.667	599	27787.3	779	3670	47065.7	21225.7	665	38272	5641.67	737.667	14924.8	496.333	919.667	95.3333	658	43.3333	0	0
243	Sme_N_F07_02uM	16640.7	6188.67	7723	15236.7	5479.33	24356	608.333	14661.7	26560.3	3738.33	29038.3	25506.3	31304.3	6714	29693.7	19705.7	18328	10617.7	16227.8	39374.7	164	712	20457.3	5431.33	14027	6820	2693	39500.3	24146	565.333	0	39817	463.667	9498	60515	30573.3	1503	35103.7	13975.3	2444.67	17267	387.667	1142.33	380	384	232.667	27	29.6667
244	Sme_N_F07_06uM	20477	8784.33	12140	17829	8034.67	18336	693	4535.67	24971.7	14161	36035.3	32272.7	35314.3	9838	40643.3	32468	31638.3	17517	20316.1	39803.3	335	1130.33	29926	8668.67	12835	16187	3141.67	46364	32841.3	794.667	552.667	15753	725	10212.7	52756.3	25633.7	2924	22048.7	13353.7	2905.33	16799.3	115.333	1258	585	805.333	610	8	1.33333
245	Sme_N_F07_10uM	21103	8032.33	15486	19503.7	5975.33	27642	515.333	21538.3	31797.7	16820.3	46127.7	35144	37225	9490.33	47763	38014	32637.3	17472	24016	31972.3	523	871	28189	11230.7	13602.3	23091	3461.67	52428	27751.3	600.333	4.66667	25669	763.667	9771.67	60204.3	34850	2510	35275	16963	3689.67	18986.6	282	1465.33	803.333	1125	722	0	106.333
246	Sme_N_F07_20uM	23187.7	9667.33	8893.67	18557	5478	27781	587	21449.3	30335.3	15312.3	41654	32196.7	33242	11860.3	38341.3	33847.3	31513.3	16745.3	22258.3	37916	441	1379	24797.7	9934.67	13975.3	17232.3	2905.67	54742.3	37021	359.667	0	31303.3	798	10053	49200	36080.3	3029.67	33103.7	12784	3511.67	18852.8	814	1357.67	938	958	718.333	6.66667	145
247	Sme_N_F07_60uM	23670.3	6415.33	12677	19343.7	2883	19925.3	959.333	23567.7	28207	9028	25831.3	36474	35131.7	10230.3	37048.7	26538	33243.3	5784.5	19831	40838.3	531.333	646.667	23562	8942.67	14454.3	19689.3	2497.33	61330.3	29939	757	0	19345.7	250.667	13969	51847.7	31479.7	1790.33	34773.3	19624	3754.67	18813.4	412.667	941.5	986.333	647.667	324.333	59	103.333
248	Sme_N_F08_02uM	17126.7	8944	1634	20799.3	7977.67	20433	429	16971.3	26300	13378	37764.7	24380	35110.3	1480.33	17652.7	24084.7	26629	18653	17763.8	9548.67	114.667	916.667	12785.7	3904.33	11495	5387.33	1982.33	30049.3	22019.7	593.667	1902	19224.7	446.333	2948.33	46731.3	20334	1035.67	20588	6698	272.667	10935.3	91	108	124.667	165.667	114	0	13.6667
249	Sme_N_F08_06uM	23568	13234.7	2618	26468.3	9266	30665.3	625.333	23170	25830.7	17932.3	34069.7	26425	34894	2188	32367	31405	32800.7	24140	21759.3	24218.3	309.333	623.333	13257.7	5909.33	0	7617.33	3292.33	43068	24445.3	400	924.333	26952.7	673.333	4346.33	55359	21911.3	2418.67	28971.7	6902	588	13580	882.333	997.333	269	650.333	128.333	0	1.33333
250	Sme_N_F08_10uM	21009	12478.3	8846.67	26399.3	7758	32193.7	589.667	19134	30251	20769	40599.3	32879.3	38267.7	3238.67	38768.7	28667	31533.7	26421.7	23322.5	28677.3	344	398	23267.3	6090	18612.7	8046.67	4096.33	44038.3	24350.7	355.333	2034.33	46128.7	774.333	5609.67	56964.3	27185.3	2234.33	37531	8620.67	1018	17268	52	1550.33	185.333	496.333	222.667	6	0
251	Sme_N_F09_02uM	12711	6123	6299	12258.7	4910	10091	209.333	11035.7	20764.3	10703.3	33737.3	17601	31268.3	5785.33	29200.7	17792	24973	9947	14745	31710.3	346.667	1241.67	20133.3	4022.67	12477.3	11286.7	2192.67	46124.7	29955.3	613	219	26662	475	6090	45204.7	28781.3	1356.33	29055.7	7575.67	601.333	15276.2	338.333	768	1113	541.667	275	0	66
252	Sme_N_F09_06uM	12028.7	7527	12578.3	16120.3	5271.33	24504.3	576.333	9545	19843.3	4361.67	40327	31479	35471	8695	34291.7	25624.3	16747.7	20722	18095.2	36430.3	392.333	827.667	22360	6869.67	15558.3	9545.67	4466	43010.3	34157.7	587	75.3333	44358.3	800.333	10261	46685	36036.7	597.667	35729.3	16329.3	3682.33	18253.9	297	1706	706.667	618.333	615	64.6667	87.3333
253	Sme_N_F09_10uM	26774.7	6059	11855.7	14487.3	3729	20428	996	14208	33738.7	13552.7	41915	31869.3	27948.3	13842.7	49221.7	35684.7	41652.7	11927	22216.1	33047.3	1045	770.333	29232.3	11640.3	6062.67	22396.3	2360.67	58641.3	37956	541.667	471	8658.33	838.667	11492	49250	32883	925.667	30512.7	14828.3	3210	17677.7	394	888.333	1050.33	864.333	889.333	0	137.333
254	Sme_N_F10_02uM	6373.67	3990	671	8967.67	4563	8966	325.667	995.667	16897.7	5379.67	17719.3	21191.7	13497	5142.67	45357.7	3921.67	3261	9551.33	9820.69	18560	139.667	3.66667	7058	309.333	5791.67	3237.67	868.667	27049.3	16806.3	156.667	0	16956.7	56.6667	1134.33	25762.7	21022	891	20599.3	4100	967	8525.18	0	336	187.333	95.3333	156.333	0	11.3333
255	Sme_N_F10_06uM	14475.3	7347.67	3043	17083	3770	27869.2	438	14018.7	23848	18843.3	40788.3	29860.3	24105.3	11567.7	46957.7	29710.7	12010.3	24001.7	19429.9	37475	211	439.667	21280.7	6843	14550	14850.7	3610	53287	30087	442.333	180	19546.7	659.333	11462.3	60522.7	32212.3	3069.67	27537.3	7424	3463	17284.5	18.6667	1894.67	532	513.667	559	0	12.6667
256	Sme_N_F11_02uM	13412.7	3651.67	2301	9144.33	5718.67	13214	730	14354.3	23596	10304	30598.7	25655.3	25371.7	11732	45088.3	20348	18025	4516	15431.2	45361	801.667	218.333	21354	8212	15683	8003.67	4190	53596.7	29885.3	1044.67	0	30816.7	206	10607.7	59647	25723.3	1408.33	35342.3	17560.3	4256	18483.1	0	1595.33	1736	368	321	68.3333	139.333
257	Sme_N_F12_02uM	4775.33	931	591.333	1353.33	1594	4286.67	491.333	0	6805.67	3296	6865.33	9607.33	14559.7	1007	27858.7	5750.33	2930.33	4960.33	5425.76	1599.67	598	162.333	14892.3	731	14599	6632.67	3208.33	36494.3	18832.3	272.333	5294.33	5566.67	6126	9790.33	40048	11627	0	14570.7	3400.33	1336.67	9722.28	0	102	55	133.333	406	0	63.6667
258	Sme_N_F13_02uM	27576.7	4784.67	4684.33	20332	1457.33	20360.3	504.667	1370	19685.3	6668.67	9897.67	26075	34308.7	57.3333	28069.3	10054	10243	19366.7	13638.6	24078	1384	373	2631.67	234.667	9475.33	7804.67	599	18980.7	9659.33	567.667	0	9732.67	141.667	3614.83	41293	9278	1256.67	36461.3	1125.67	74	8934.59	0	1088	188	151	0	7.33333	91.6667
259	Sme_N_F13_10uM	24485	13967	2980.33	28358	6189.67	25961.7	0	16829	21746.3	17860.3	38665.3	38697.3	28612.3	291	31079	16451	18350	30386.3	20050.5	24815.3	743.333	837.667	19271.7	5896.33	14012.3	13318.7	3004.67	51981.7	26218.7	313	731.667	15977.7	641.333	3536	45708	28713	5026.67	35571	3296.67	492	14980.8	659.667	4716	175.333	455.667	0	0	0
260	Sme_N_F14_02uM	13529	12454.3	1857	11631.7	2734.33	18984.7	0	22329.7	22299.3	7196.67	26135.3	19369	5131.33	440.667	22782	2821.33	17569.7	27656.3	13051.2	9812	1441	970	15215	2329	7028.33	11577	1270	31924	17293.7	199.333	358.5	13096	560	1337.33	27555.3	8134.33	1587	24106.7	1188.67	133.333	8849.16	449	702.333	0	381	19	0	0
261	Sme_N_F14_10uM	30052.3	17921.7	3801.67	28972.3	7269.67	35863.7	0	25268.7	36229.7	16907.3	43591	47255.7	42623	1175.33	44052	34621	45473.7	33181.3	27458.9	29533.7	2992.67	3487	26185.7	9067.67	25281	17792.3	4250.67	54660	36669.7	706.667	347.667	27971.7	1624.33	3281	53788.7	29214.3	3829	37787.3	3038.33	416.333	18575.5	1701	3447.33	34	1541.33	166	0	0
262	Sme_N_F15_02uM	0	357.333	0	0	0	7965.67	0	0	0	0	630.667	0	619	217.667	0	0	0	301	560.63	0	0	228	0	0	498	0	154.667	227	0	115.333	0	0	0	70.3333	41.3333	873.667	286	0	216.333	0	135.533	0	169	0	167.667	97.6667	0	0
263	Sme_N_F16_02uM	10641	3247.67	5094.33	7695.17	4977	16117.7	599	17708	11237.3	4826	9355.33	24487.3	23118	7634.33	37433	19902.3	15032.3	1230	12240.9	42455	220.333	514.667	27646	10783.3	11321.7	10086.7	1448	54146	19093.7	190.667	0	13679	449.667	12785.7	49325.7	24537.7	634.333	25694.3	8233.33	4066	15662.3	0	278.5	448	263.333	345.667	41	241
264	Sme_N_F16_10uM	8785	4831.33	4876	7550.33	4726.33	13380.7	255.333	17948.3	14688	5616.33	38411.7	28898.7	21104.7	10292.3	45653.7	18510.7	21142.3	12882.3	15530.8	34669	560	743	28249.7	8462.33	7767	12349.7	2213	58782.7	36582.3	451	586	26787.7	794.667	10949.7	48394.3	29257	1888	25903.3	7288.67	3587	17134	652.333	1074.67	1717.67	794.333	795.333	71.3333	122.333
265	Sme_N_F17_02uM	16894.3	5465.67	4269	19718.3	6859	23459	1494	9434.33	21420	14342.3	30115	17751.7	22795.3	3702	30351.3	12943.3	18840	11197	15058.4	17367.3	124.667	167.667	7633	2249.33	9388	660.667	760.333	45952	17996	676	0	10180.3	1094.33	1158	40124	14635.3	1127	17840.7	1611.67	536.667	9537.32	347.667	373.333	230.333	1001.33	832.667	105	70.3333
266	Sme_N_F17_06uM	27815.7	8502.33	2396.33	18527	7799.67	16829.3	971	15925.7	20787.7	7158.67	37903.3	26284	21925.3	5140.33	42522.3	22457.7	25197	19242.7	18188.1	25070.7	0	0	12642.3	5156.33	9437	2004.33	1361.33	36537.7	23280.3	315.333	340.333	9679	431	4093.67	39914.3	13539.3	1711.33	14160	3126.33	373.667	10140	0	362	168.333	439	172.333	0	0
267	Sme_N_F17_10uM	18125	6482	2424.33	14172	8634	22918.3	664.667	21372.3	31464.7	7932.33	36205.7	25895.3	20597	6349.67	42939.7	30806.7	20737.3	10742.7	18248	31196.7	66	230.333	17095	3860.67	10532	2331.67	1347	48525	24931.7	107	260	31517.7	574.667	5909.33	57195	19420	1788.33	21915	3301.33	750.667	14105.2	479.167	587.333	365.333	284.333	122	41.3333	0
268	Sme_N_F17_20uM	16111.7	8470	4182.67	17234	5589	17242.7	531.333	6182.67	27924.7	16850.3	43580.3	20593	17099.7	6143	31188	29193	17920.7	19805.3	16991.2	21629.3	153	581	16204	2783	5802.33	3531.67	1167.67	51900.3	21981	41	320.333	20420.3	292.667	4606.33	35753	21356.7	2071.33	11027	2005	526.333	11181.4	743.667	986.667	172.333	379.667	209	0	0
269	Sme_N_F18_02uM	4424.33	3132.33	1857.33	1817.33	1926.67	8739	478	11713.7	18775.7	5015	26462.3	12158	25245.7	5090	34006	16337.7	12396	8851.67	11023.7	11942	444.667	46.6667	21740	4607.67	6705.33	7052.33	917.667	61945.3	17430.7	614.333	100.667	20230.3	474.333	8850	28856.3	17999	1196.33	23447.7	2126	1119	11836.4	148.333	170	666	354.667	407.667	0	119.667
270	Sme_N_F18_06uM	11953.3	4121.67	2566.33	8525.33	3702.33	13691	232.333	7008.67	22555.7	6638.67	29164	16579	22683.7	3944.33	45559.7	17756.3	13515.3	13260.3	13525.4	28070.7	82.6667	1337	14956	4401.67	9694	7570.67	1336	61589.3	20908	162	20.6667	7257.67	740.667	8616.67	45881.3	18123	1756	22328	7867.67	974.667	13135	0	506.333	746.333	580.333	510	0	75.6667
271	Sme_N_F18_10uM	10946.3	3833.67	1869	8912.33	3797	11559.7	233	9662.67	21667.3	9209.33	30141.7	16966.7	27108.7	5796.33	39171.7	13756	14997	13023.3	13480.6	25286	325.333	278.667	23009.7	5404.33	11423	7028	1748	54350	21368.7	319	0	23284.3	356.333	10410.3	43000.7	18916	1526.33	18156.3	9348	1541	13777	466	672.333	597	373	383.333	4.33333	44
272	Sme_N_F18_20uM	10595	3924	2572.33	8105.33	2660.33	13273.7	392.667	7738.67	21897.3	8291.67	31923	14416.3	22887.7	6353	49608.3	18928.3	17862.3	15546.3	14276.5	28525.7	380.667	564.333	25653	6946.33	8967.67	9229.33	1490.33	47352.3	24013.7	416	202.667	24193.3	780.667	8812.33	43340.7	22223	2052	19065.3	7079.33	1245.67	14064.4	302	847.667	1015.33	509	484.333	0.666667	22.6667
273	Sme_N_F19_02uM	22074.7	9448.67	1580	23879	3452	20766	1081.33	22733	30319.3	18136	41733.3	22613.7	4801.33	4558.67	31206.3	31454	43375	19219.3	19579.5	11058.7	378	366	17766.7	6406.33	10030.7	9948.67	2512	52887.7	23645.7	603.667	817.333	23185.7	488	5135.33	28199.3	19930.7	1454.33	28826	2604.33	1596.67	12312.3	70.3333	625.333	190	371	132	0	8.66667
274	Sme_N_F19_60uM	33740.7	13303.7	5789.67	27411	10700	25806.7	919.333	26250.7	30660	13935.3	47250.3	35726	29520	6682.33	42303	33376	24547	26961.7	24160.2	36800.3	250.667	1165	21159.3	7757	18753.7	16237.3	4119	62486	32392	385.667	125	10627.3	668.333	6879.33	58275	28867.7	3294.67	32212	9146.67	1952.67	17580.1	66.1667	2591	724.333	1089.67	304.667	21.6667	0
275	Sme_N_F20_02uM	7536	2917	5913.67	1839.33	2681.67	5343	277.667	10551	18941	6699	23666.7	17358	25994.3	10572	33599.7	4412.33	12306	7617.67	11012.6	30029.3	308	403.667	18099.3	6769	12823.3	18922.7	2396.33	29425.7	20129	543.667	30.6667	14733	105.667	7401	42194.3	25612.7	848	20134	17855.3	3412.67	13438.2	679	1061	743.333	482.333	247.667	28.6667	54
276	Sme_N_F20_06uM	8246.67	4054.67	7586	7986.33	5449	13045	629.667	13729	19584.7	6691.33	33897.7	22639	24864.7	8920	35640.3	15678.3	17241.7	14528.3	14467.4	31603.3	546	527.667	22644.7	7476.33	12357.3	19154.7	2917	39586.7	30679	670.667	312.5	25523.7	317	8008	49273	28174	1554.67	26584.7	10154	3123.67	15903.2	63	1921.33	1045	456.333	253.667	12	76.6667
277	Sme_N_F20_10uM	3979.67	3855.33	4222	5330.33	3294	15158	516.667	15953	27177	6736.67	40038.3	30663.7	32811.7	12127.7	41130	26175.7	24681.3	11668.7	16973.3	34461.3	338.333	1140.67	21915	11233	14662.7	25475	3281	52603	42419.7	630.333	339	26559.3	469	12779.3	50544.7	37881.3	1630.33	30263.3	13486.3	3917.33	19105.6	169	1793.33	1291.67	673.667	687	39.6667	157.333
278	Sme_N_F20_20uM	12904.3	4105	14939.3	8896	5124.67	14372.7	183.667	14666.7	28544.7	7533	38301	33115.3	30963.3	11843.3	47791.7	17397.7	20899.2	12821.3	18022.4	39648.3	909	558	18314	11361	12047.7	25285.7	4469.33	56878	36396	324.667	0	12005.7	325.667	13694.3	57820.3	38847.3	2127	37199.3	25349.3	4770	19678	19.3333	1753.33	1657.33	833	593.667	4.66667	58.3333
279	Sme_N_F21_02uM	20609	10955.7	6228.33	13601.7	3771.67	22256.7	693	34788	35987	8236	35930.3	28179	24101	4744.33	35545.7	14278.7	31333.3	13681	19162.2	27641.3	172.667	215.667	16458.3	8377.67	14762.3	6503.67	2665	31306	23975	535.333	101	14581.3	516.333	2959	51480.7	19474.7	686.333	30922	5383	909	12935.9	0	187.5	340	378	79.6667	0	0
280	Sme_N_F21_06uM	31202	18834.7	5292.33	21087	11946.7	32629	1225.67	31946	33367.7	18444.7	44997.7	33608.3	24211.7	2962	32834.7	27957.7	44450	27543.7	24696.7	26196.3	367.667	1224	23530.3	10044.3	0	9412.67	4243.67	48621.7	30989	453	1630.67	27174.7	786.667	3729.33	46082	26714.7	3391.67	22364.7	3936.33	1345.33	14544.7	737.333	1297	185.667	956.333	105.667	0	0
281	Sme_N_F22_02uM	27539	6483	8296.67	14563.7	3706.67	24079.7	453.333	27640.7	28566	13715.7	38185.7	25434	29392	11970.3	34394.7	27298.3	30781.3	18719.3	20623.3	17718	250.667	142.667	22217	6606.67	9206	16867.7	3297.33	53232.3	25915.3	372.667	570.667	23874.7	142.333	7631.33	38926.7	27623.3	1916.33	27053.7	11495.7	1416.67	14753.1	0	1240.67	822	561.333	229.667	0	84
282	Sme_N_F23_02uM	4373.67	3270	9235.67	3112	2518	9237	444.667	7766.33	23470.3	7921.33	25319.7	18459.7	20338.7	11593.7	38311	9681	16433.3	9476	12275.7	28003.3	424.333	205.667	20639	5520.67	8580.67	20367.7	3359.33	43739	30784.7	624	229	8114	135	8044	42811.3	26726.7	1451.33	19207	13665.7	2742	14131.6	0	1315.67	497.667	425.333	518.333	5	123.333
283	Sme_N_F23_10uM	9082.33	3786	12213.3	8415.67	4049.67	12074.3	439.333	21587.3	19730.7	9911	35026.7	25537.3	27956.3	12472.3	41190	21308.3	20732	8010.67	16306.9	40045.7	539.333	313.333	27346.3	13223	17253	21708.3	5867	45812.3	32601.7	604.333	89.6667	42737	157.667	16569	46346.3	40007.3	2459	32840.3	23467.3	5088	20499.4	183	2168.67	1288.67	411.667	422.667	3	90.6667
284	Sme_N_F24_02uM	15343.7	6809.67	6442.33	15921	6382.33	16819.3	438.667	17264.7	24865.7	9089.33	29202.3	18233.7	28712.7	9626.67	32787	25914	27810.7	15436	17061.1	29741.7	381.667	414.333	18802.7	5887.67	12389	17027	3260.67	42255	26821	413.667	399	26425	230.333	9615	48141	29224.3	1411.67	22666	10181.7	2193.67	15284.4	418.333	1191	930.333	490.333	166	11	134.333
285	Sme_N_F25_02uM	1967.67	4021.67	2523.33	6143.17	3039.67	11742.3	543	7899.67	7814	8140	20606.3	11595.3	24532.3	2855.5	38648	10240.7	4198.67	3291.5	9433.49	13385	129	0	11998.3	694.333	12142	2697	1110.33	40959.7	14171	521	0	15752.3	354.333	4290.33	44236.7	13228.3	771.833	3361	5315.33	472	9255.89	0	400.5	422.333	318	287.333	75.6667	46.6667
286	Smw_F01_2uM	0	757.667	296	0	1661.67	489	0	0	0	0	160.667	0	0	0	0	549.333	410.333	0	240.259	0	329.333	773.333	110.667	0	165	1012	0	0	589.333	0	0	0	16.6667	95.6667	0	1263	0	936	171.333	0	273.117	8.33333	1516.33	0	0	0	0	0
287	Smw_F02_2uM	19952.7	12380.3	1706	12847	1923.33	8653.67	316.667	21774.3	20675.7	18974	33059	33025	19848.3	230.667	21447.7	6537.33	15239.7	31064.3	15536.4	5399.67	303.667	160.333	16321.3	4115	6913.33	10906.3	2173	30988.7	24706	311.667	414	6204.33	156	546.667	27342.7	14022.7	1829.33	13337.7	360	309.667	8325.62	971.333	1819.33	47.3333	350.667	4	0	10.6667
288	Smw_F03_2uM	3813.67	3337	2535.67	1188.67	2313.67	5400.33	525	13171.7	18216	5760.33	27023	29300	6343.67	9654	30014.7	17847.7	12316	10293.3	11058.6	18304.7	618.667	139	19007.3	6189.33	7115.33	12795.7	2374	41887	33531	2036	501.333	14975.3	2353.33	5476	49420.3	25009.7	3588.67	29778.3	8723.67	1951.67	14191.2	140	744.333	290	221.667	119.667	0	43
		2377	871.667	510	926.333	2409.33	1549.33	1547.33	4656.33	2447	1294	1090.67	3431.33	1146.67	1202	3951.33	3221.33	1856.33	1782	2015	3100.67	542.667	318	847	343	1040.67	518	156.333	2399	613	1168.67	932	467.333	522.667	212.667	192.667	551	665.667	498.667	111.333	914	767.381	155.667	150	159.333	106	190		217.593
																										1040.67
[truncated: 3 more columns]

## Sheet: IgG - pvalues
		S. haematobium infected vs Non-Endemic		S. haematobium vs S. mansoni infected		S. mansoni infected vs Non-Endemic
Fraction ID	Fraction Name	P.Value	adj.P.Val	P.Value	adj.P.Val	P.Value	adj.P.Val
1	Blk1	0.00294592	0.00453702	0.00223148	0.0146061	0.505868	0.592236
2	Blk2	0.907149	0.910309	0.348648	0.481539	0.541007	0.62324
3	Blk3	0.108189	0.133156	0.00649248	0.0322385	0.592099	0.6501
4	Blk4	0.610291	0.648574	0.247771	0.400888	0.158967	0.217334
5	Blk5	0.492203	0.53899	0.973453	0.981526	0.501648	0.589692
6	Blk6	0.355498	0.403085	0.95617	0.973064	0.370136	0.455552
7	Blk7	0.0545239	0.0701021	0.866627	0.910908	0.0675955	0.103003
8	Blk8	0.516936	0.56393	0.392235	0.520569	0.994289	0.997754
9	Blk9	0.924378	0.924378	0.0548149	0.166176	0.159228	0.217334
10	Crude Ag ShCA	0.00151996	0.00245925	0.385348	0.516187	0.000151676	0.000539292
11	Crude Ag ShSEA	0.0932469	0.115258	0.981312	0.984731	0.0916469	0.136053
12	Crude Ag SmCA	1.00465e-08	5.79611e-07	0.968284	0.981526	5.99102e-09	1.72541e-06
13	Crude Ag SmSEA	7.49694e-07	4.23357e-06	0.641738	0.728609	2.04676e-06	2.37178e-05
14	NG-1_2uM_x000D_	0.385483	0.433669	0.0686827	0.193145	0.582117	0.647296
15	NG-1_20uM_x000D_	0.172676	0.205165	0.823998	0.879064	0.223999	0.28929
16	NG-10_2uM_x000D_	0.0244042	0.032843	0.00679092	0.0328997	0.868682	0.893501
17	NG-10_10uM_x000D_	0.0363006	0.0480583	0.453995	0.575994	0.116639	0.165478
18	NG-11_2uM_x000D_	1.05816e-05	3.07827e-05	0.0132614	0.0561661	0.00482648	0.0105305
19	NG-11_10uM_x000D_	2.41304e-06	9.65218e-06	0.0944221	0.23738	0.00017654	0.00060528
20	NG-12_2uM_x000D_	4.7732e-06	1.67644e-05	0.116955	0.268229	0.000250838	0.000811699
21	NG-13_2uM_x000D_	0.855057	0.87325	0.910408	0.939776	0.784947	0.825054
22	NG-13_20uM_x000D_	0.00297782	0.00456177	0.0575266	0.17258	0.104527	0.150566
23	NG-15_2uM_x000D_	3.53941e-08	7.28107e-07	0.348986	0.481539	3.73975e-07	1.07972e-05
24	NG-2_2uM_x000D_	0.63632	0.671282	0.261993	0.407859	0.178383	0.23895
25	NG-2_20uM_x000D_	0.297202	0.345138	0.0491779	0.158751	0.623805	0.677946
26	NG-3_2uM_x000D_	0.36441	0.411569	0.334131	0.476385	0.863895	0.891763
27	NG-3_20uM_x000D_	0.299701	0.346642	0.212267	0.366065	0.933914	0.953784
28	NG-4_2uM_x000D_	0.680367	0.71253	0.253415	0.404474	0.193275	0.25417
29	NG-4_20uM_x000D_	0.607913	0.64844	0.140294	0.289538	0.0974172	0.143144
30	NG-5_2uM_x000D_	0.00459574	0.00685789	0.342961	0.481539	0.0278943	0.0498439
31	NG-5_10uM_x000D_	0.000208867	0.000390609	0.34945	0.481539	0.00169121	0.00416297
32	NG-7_2uM_x000D_	0.283884	0.331006	0.252025	0.404474	0.0506376	0.0832007
33	NG-7_10uM_x000D_	0.441825	0.491296	0.146698	0.294885	0.0587448	0.0909598
34	NG-8_2uM_x000D_	0.55539	0.599072	0.791727	0.860443	0.422135	0.506918
35	NG-8_6uM_x000D_	0.0158965	0.0219052	0.220672	0.376057	0.123253	0.172314
36	NG-9_2uM_x000D_	2.76885e-07	2.42606e-06	0.240497	0.391317	5.67836e-06	4.3036e-05
37	NG-A1_2uM	1.45552e-05	3.88138e-05	0.156813	0.301082	0.000471836	0.00141551
38	NG-A2_2uM	2.11677e-06	8.58632e-06	0.0273807	0.0998182	0.000638098	0.00180169
39	NG-A3_2uM	1.99518e-07	2.12819e-06	0.32748	0.471212	2.36365e-06	2.37178e-05
40	Oglyc_CA1_0.08uM	3.44367e-05	7.68819e-05	0.12408	0.268229	0.00138739	0.00356757
41	Oglyc_CA2_0.602uM	3.4998e-08	7.28107e-07	0.0658645	0.189881	5.15259e-06	4.14374e-05
42	Oglyc_CA3_1.04uM	0.00220579	0.00345255	0.102219	0.249485	0.0536914	0.0849623
43	Oglyc_SEA_1_0.18uM	2.68331e-06	1.0566e-05	0.0230653	0.0868018	0.000930331	0.00252769
44	Oglyc_SEA2_0.102uM	0.0289682	0.0386243	0.274663	0.42301	0.160947	0.218618
45	Shc_F07_02uM	0.183927	0.217094	0.291879	0.444768	0.591134	0.6501
46	Shc_F08_02uM	0.126756	0.154212	0.80082	0.867053	0.173773	0.233863
47	Shc_F09_02uM	8.43796e-05	0.000168759	0.257071	0.404571	0.00117364	0.0031297
48	Shc_F10_02uM	2.80431e-05	6.51325e-05	0.306417	0.447983	0.000320382	0.000992151
49	Shc_F11_02uM	0.11613	0.142321	0.641123	0.728609	0.213881	0.27999
50	Shc_F12_02uM	0.0485557	0.0629912	0.430614	0.558634	0.010066	0.0204155
51	Shc_F12_06uM	4.21452e-06	1.52871e-05	0.474408	0.586393	2.28601e-05	0.000110575
52	Shc_F01_02uM	0.250846	0.293674	0.122924	0.268229	0.969864	0.981213
53	Shc_F02_02uM	0.539546	0.586374	0.4229	0.551109	1	1
54	Shc_F02_06uM	0.0140714	0.0195698	0.0690761	0.193145	0.260793	0.330873
55	Shc_F03_02uM	0.152029	0.181678	0.261312	0.407859	0.55497	0.628326
56	Shc_F03_06uM	2.28328e-08	7.28107e-07	0.0650127	0.189881	3.46401e-06	3.1176e-05
57	Shc_F04_02uM	0.149317	0.17918	0.0659757	0.189881	0.977347	0.984182
58	Shc_F05_02uM	0.000452523	0.000771163	0.41074	0.540152	0.00266686	0.00619399
59	Shc_F05_06uM	0.0618658	0.0788379	0.178841	0.321913	0.383456	0.469938
60	Shc_F06_02uM	0.0681422	0.0860744	0.97471	0.981526	0.0674878	0.103003
61	She_HFa_F01_02uM	0.000274432	0.000490909	1.06981e-05	0.000342341	0.853251	0.887093
62	She_HFa_F02_02uM	0.00122571	0.00199437	0.000399348	0.0038956	0.595216	0.6501
63	She_HFa_F02_06uM	0.000278143	0.000492926	0.000280135	0.0029881	0.356243	0.442232
64	She_HFa_F02_10uM	0.000255291	0.00046534	0.000683165	0.00562147	0.244659	0.311778
65	She_HFa_F03_02uM	2.73374e-05	6.40095e-05	0.010173	0.0450741	0.012516	0.0248595
66	She_HFa_F03_06uM	2.43903e-05	5.90287e-05	0.000419318	0.0038956	0.082955	0.124432
67	She_HFa_F04_02uM	0.00171133	0.00275342	0.00154958	0.0114431	0.448941	0.534276
68	She_HFa_F04_06uM	0.000162338	0.000309624	0.00795388	0.0369471	0.0534371	0.0849623
69	She_HFa_F04_10uM	1.49167e-05	3.94128e-05	0.00215858	0.0144575	0.0237389	0.0438257
70	She_HFa_F05_02uM	4.37717e-06	1.55633e-05	0.000830374	0.00664299	0.0183718	0.0352738
71	She_HFa_F06_02uM	4.04756e-05	8.76463e-05	0.00361006	0.0216604	0.0342083	0.0589595
72	She_HFa_F06_06uM	8.55401e-06	2.58449e-05	0.00614167	0.0312913	0.00756952	0.0157973
73	She_HFa_F06_10uM	1.80447e-06	7.64244e-06	0.00943356	0.042451	0.00152089	0.00380886
74	She_HFa_F06_20uM	3.3032e-07	2.57517e-06	0.00599279	0.0312913	0.000537261	0.00159517
75	She_HFa_F07_02uM	0.00111665	0.00184825	0.0936528	0.23738	0.034393	0.0589595
76	She_HFa_F08_02uM	1.6357e-06	7.5981e-06	0.000205861	0.00281629	0.0215348	0.0404466
77	She_HFn_F03_02uM	0.453741	0.501022	0.174723	0.31648	0.764235	0.806225
78	She_HFn_F04_02uM	0.0363775	0.0480583	0.209316	0.363787	0.238269	0.304985
79	She_HFn_F05_02uM	0.0773217	0.0968202	0.514048	0.619439	0.192833	0.25417
80	She_HFn_F05_06uM	0.0515413	0.0665645	0.7635	0.848988	0.0280372	0.0498439
81	She_HFn_F06_02uM	0.147818	0.178123	0.41558	0.544031	0.037821	0.0640733
82	She_HFn_F06_06uM	1.97069e-05	4.9786e-05	0.0321503	0.11023	0.00364192	0.00819433
83	She_HFn_F07_02uM	0.0609873	0.0780638	0.186824	0.332132	0.00427258	0.00953879
84	She_HFn_F08_02uM	0.0199531	0.0272193	0.820416	0.879064	0.0115837	0.0231675
85	She_HFn_F08_06uM	0.00346777	0.00528422	0.399404	0.527653	0.000409981	0.00125611
86	She_HFn_F09_02uM	0.0200364	0.0272193	0.00685411	0.0328997	0.802799	0.837703
87	She_HFn_F10_02uM	0.00557536	0.00819237	0.789402	0.860443	0.00866763	0.0179588
88	She_HFn_F11_02uM	0.722514	0.753928	0.0428932	0.143642	0.0536065	0.0849623
89	She_HFn_F12_02uM	0.00533378	0.00791819	0.372588	0.505102	0.0285464	0.0504378
90	She_HFn_F12_06uM	0.000120557	0.000234597	0.0129683	0.0557443	0.031288	0.0546117
91	She_HFn_F12_10uM	0.00371311	0.00559882	0.047317	0.154856	0.138604	0.190995
92	She_HFn_F13_02uM	0.00192175	0.00302439	0.00215254	0.0144575	0.421918	0.506918
93	She_HFn_F01_02uM	0.616862	0.653149	0.703473	0.788328	0.422432	0.506918
94	She_HFn_F02_02uM	0.580985	0.624342	0.184289	0.32966	0.632949	0.685298
95	She_HF_F01_02uM	0.774715	0.802583	0.00571801	0.0310124	0.0573215	0.0897207
96	She_HF_F01_06uM	0.727082	0.755956	0.304375	0.447983	0.655276	0.706815
97	She_HF_F02_02uM	0.436872	0.487671	0.0191243	0.0754493	0.285098	0.358552
98	She_HF_F03_02uM	0.327817	0.375278	0.818378	0.879064	0.413692	0.502715
99	She_A_F03_02uM	3.71658e-05	8.10889e-05	1.46447e-06	8.43537e-05	0.716873	0.764664
100	She_A_F03_06uM	6.93935e-07	4.15198e-06	3.11455e-06	0.00014646	0.102486	0.149827
101	She_A_F03_10uM	0.00820898	0.0117621	0.00619306	0.0312913	0.567779	0.636639
102	She_A_F04_02uM	0.0753516	0.0947653	0.107669	0.256959	0.570323	0.636639
103	She_A_F04_06uM	2.90419e-05	6.67964e-05	2.49321e-05	0.000586961	0.295608	0.370153
104	She_A_F04_10uM	6.21379e-05	0.000129679	4.27344e-06	0.000153844	0.660557	0.709852
105	She_A_F04_20uM	9.12613e-09	5.79611e-07	8.51639e-08	8.17574e-06	0.0422195	0.0711065
106	She_A_F04_60uM	1.3636e-05	3.7444e-05	0.000417908	0.0038956	0.0582057	0.0906122
107	She_A_F05_02uM	0.000310023	0.000544431	0.000169631	0.00257125	0.440869	0.526848
108	She_A_F05_06uM	0.000336436	0.000587233	0.00457625	0.0268971	0.117855	0.166384
109	She_A_F05_10uM	0.000150727	0.000289396	2.64948e-05	0.000586961	0.568219	0.636639
110	She_A_F05_20uM	1.62578e-05	4.25659e-05	0.000629795	0.00533473	0.0521725	0.084414
111	She_A_F05_60uM	1.92397e-06	7.91577e-06	0.000247108	0.00298185	0.0216277	0.0404466
112	She_A_F06_02uM	2.73162e-05	6.40095e-05	0.00215453	0.0144575	0.0360692	0.061467
113	She_A_F06_06uM	4.18796e-06	1.52871e-05	0.00581483	0.0310124	0.0045196	0.0100127
114	She_A_F06_10uM	3.13249e-08	7.28107e-07	0.000481338	0.00420077	0.000573437	0.0016852
115	She_A_F06_20uM	1.38099e-05	3.7444e-05	0.00131821	0.00999062	0.0306146	0.0537623
116	She_A_F06_60uM	3.39829e-06	1.30494e-05	0.000440058	0.00396053	0.0227108	0.0421982
117	She_A_F07_02uM	3.90007e-07	2.76614e-06	0.000248488	0.00298185	0.0068801	0.0144633
118	She_A_F07_06uM	8.55684e-07	4.56365e-06	0.0023631	0.0147951	0.00257404	0.00603891
119	She_A_F07_10uM	0.00048204	0.000816632	0.083488	0.222888	0.0197655	0.0374504
120	She_A_F07_20uM	5.41531e-05	0.000116389	0.00509225	0.0282444	0.0335346	0.0581805
121	She_A_F01_02uM	5.77852e-05	0.000122369	2.61473e-07	1.88261e-05	0.896198	0.918523
122	She_A_F02_02uM	0.000278982	0.000492926	0.000264747	0.0029881	0.363755	0.44962
123	She_A_F02_06uM	0.000259899	0.000470761	3.5598e-06	0.00014646	0.970619	0.981213
124	She_A_F02_10uM	6.38453e-06	2.13808e-05	0.000160866	0.00257125	0.0596549	0.0918749
125	She_N_F07_02uM	0.00190182	0.00300947	0.050161	0.158751	0.0842579	0.125732
126	She_N_F07_06uM	0.00770237	0.0110914	0.498669	0.603431	0.0264414	0.0475944
127	She_N_F07_10uM	7.28294e-06	2.35673e-05	0.282667	0.433022	0.000101928	0.000380773
128	She_N_F07_20uM	5.4985e-07	3.7704e-06	0.361465	0.495724	5.32304e-06	4.14374e-05
129	She_N_F08_02uM	6.28077e-05	0.000130056	0.328021	0.471212	0.00061147	0.00176103
130	She_N_F08_06uM	0.000578261	0.000973913	0.830322	0.882409	0.000283158	0.000895354
131	She_N_F08_10uM	1.80095e-06	7.64244e-06	0.154175	0.298002	6.91646e-05	0.000269181
132	She_N_F09_02uM	0.339748	0.386748	0.390508	0.520569	0.10456	0.150566
133	She_N_F09_06uM	0.000213545	0.000396781	0.028837	0.103813	0.0262146	0.0474831
134	She_N_F09_10uM	0.00282808	0.00437897	0.709535	0.792039	0.0055858	0.0120053
135	She_N_F09_20uM	3.39659e-07	2.57517e-06	0.0497602	0.158751	6.32873e-05	0.000250169
136	She_N_F10_02uM	0.0922609	0.114531	0.14959	0.297117	0.547379	0.625576
137	She_N_F10_06uM	1.6539e-08	6.80461e-07	2.80279e-09	8.07203e-07	0.229878	0.295558
138	She_N_F10_10uM	7.2083e-07	4.15198e-06	5.96447e-05	0.00117417	0.0249928	0.0458467
139	She_N_F10_20uM	2.5877e-07	2.42606e-06	0.000188563	0.0027153	0.0060573	0.0128272
140	She_N_F10_60uM	7.15819e-07	4.15198e-06	1.45217e-05	0.000418224	0.0517633	0.084225
141	She_N_F11_02uM	0.00735749	0.010648	0.00478186	0.0275435	0.589052	0.6501
142	She_N_F11_06uM	0.000262352	0.000472234	0.0956113	0.23738	0.0105849	0.0213179
143	She_N_F11_10uM	0.000650575	0.00108933	0.121219	0.268229	0.0174822	0.033791
144	She_N_F11_20uM	3.69772e-05	8.10889e-05	0.217476	0.372817	0.000702384	0.00196395
145	She_N_F11_60uM	0.0430775	0.0566464	0.941768	0.964163	0.0455003	0.0761866
146	She_N_F12_02uM	0.00367491	0.00557039	0.0513935	0.159154	0.130381	0.180528
147	She_N_F13_02uM	5.73334e-05	0.000122311	0.119032	0.268229	0.0022851	0.00548424
148	She_N_F13_06uM	8.15051e-07	4.51042e-06	0.233961	0.386118	1.70105e-05	8.90729e-05
149	She_N_F13_10uM	0.00010088	0.000200369	0.167853	0.309883	0.0024659	0.00586924
150	She_N_F14_02uM	2.47004e-05	5.9281e-05	0.000215133	0.00281629	0.115107	0.164113
151	She_N_F15_02uM	0.000139118	0.000268899	0.583197	0.694053	0.000451903	0.00136998
152	She_N_F15_06uM	1.65574e-05	4.29598e-05	0.307988	0.447983	0.000192941	0.000646485
153	She_N_F01_02uM	0.00988625	0.0140258	0.000270311	0.0029881	0.758786	0.803421
154	She_N_F01_06uM	0.471592	0.518392	0.610025	0.711733	0.736718	0.782932
155	She_N_F01_10uM	0.0141338	0.0195698	0.0298415	0.104934	0.403149	0.491979
156	She_N_F02_02uM	0.0137063	0.0191622	0.0213335	0.0830278	0.458699	0.543643
157	She_N_F03_02uM	0.59156	0.633343	0.887514	0.928285	0.663198	0.710041
158	She_N_F04_02uM	0.00118872	0.00194874	0.0160009	0.0667865	0.128587	0.178903
159	She_N_F04_06uM	4.2464e-06	1.52871e-05	0.00924275	0.0422526	0.0031325	0.00710361
160	She_N_F04_10uM	3.58677e-05	7.94609e-05	0.463995	0.581002	0.000193048	0.000646485
161	She_N_F05_02uM	0.126904	0.154212	0.23462	0.386118	0.524192	0.606295
162	She_N_F05_06uM	9.5278e-06	2.82887e-05	0.328866	0.471212	0.000101758	0.000380773
163	She_N_F06_02uM	0.0203886	0.0275677	0.61041	0.711733	0.047425	0.0789503
164	She_UN_F01_02uM	0.00178449	0.00283941	6.11547e-05	0.00117417	0.970992	0.981213
165	She_UN_F02_02uM	0.010055	0.0141953	0.00271105	0.0166124	0.789067	0.826369
166	She_A_F08_06uM	6.48476e-06	2.14668e-05	1.80914e-05	0.000473666	0.161686	0.218618
167	She_A_F08_10uM	2.77338e-08	7.28107e-07	5.94643e-08	8.17574e-06	0.0938271	0.138575
168	She_A_F08_20uM	6.05163e-05	0.000127217	0.00014431	0.00257125	0.219974	0.286509
169	She_A_F08_60uM	0.000106869	0.000210811	0.000160551	0.00257125	0.278758	0.352116
170	Shw_F01_2uM	0.0432715	0.0566464	0.016578	0.0682067	0.856291	0.887093
171	Shw_F02_2uM	0.430468	0.482392	0.783111	0.859794	0.556331	0.628326
172	Shw_F03_2uM	1.00627e-08	5.79611e-07	0.0950091	0.23738	9.23938e-07	1.72464e-05
173	Smc_F01_02uM	0.00430238	0.00645357	0.0261202	0.0964438	1.25237e-05	6.93621e-05
174	Smc_F02_02uM	9.54114e-08	1.44624e-06	0.364069	0.496928	9.2518e-07	1.72464e-05
175	Smc_F03_02uM	4.13504e-06	1.52871e-05	0.160445	0.303404	0.000142641	0.000517677
176	Smc_F04_02uM	0.000215869	0.000398527	0.256448	0.404571	0.00276566	0.00636656
177	Smc_F05_02uM	7.36996e-06	2.35839e-05	0.0792375	0.215287	0.000602991	0.00175416
178	Smc_F06_02uM	4.00653e-08	7.69253e-07	0.209683	0.363787	1.06857e-06	1.81028e-05
179	Smc_F07_02uM	2.64433e-07	2.42606e-06	0.154106	0.298002	1.1066e-05	6.37403e-05
180	Smc_F07_06uM	2.5084e-07	2.42606e-06	0.142629	0.290387	1.18054e-05	6.66661e-05
181	Smc_F08_02uM	3.40374e-08	7.28107e-07	0.203235	0.356901	9.58133e-07	1.72464e-05
182	Smc_F08_06uM	1.78435e-07	2.10122e-06	0.0922494	0.23738	1.57653e-05	8.40817e-05
183	Smc_F09_02uM	9.4554e-08	1.44624e-06	0.112884	0.262183	6.46068e-06	4.77096e-05
184	Smc_F10_02uM	1.42123e-08	6.80461e-07	0.201561	0.356132	4.08052e-07	1.07972e-05
185	Sme_HFa_F01_02uM	0.00653285	0.00955057	0.00509969	0.0282444	0.547018	0.625576
186	Sme_HFa_F01_06uM	0.00541774	0.00800158	0.0462244	0.153019	0.180199	0.240265
187	Sme_HFa_F01_10uM	0.000392824	0.000677444	0.0231091	0.0868018	0.0482052	0.0797879
188	Sme_HFn_F01_02uM	0.064964	0.0824213	0.456438	0.576553	0.188887	0.250689
189	Sme_HFn_F01_20uM	0.866635	0.878842	0.303995	0.447983	0.332737	0.414841
190	Sme_HFn_F02_02uM	0.199137	0.234088	0.0186994	0.0750413	0.00226855	0.00548424
191	Sme_HFn_F02_06uM	0.136419	0.165078	0.233507	0.386118	0.0166112	0.0323246
192	Sme_HFn_F02_10uM	0.009384	0.0133792	0.785159	0.859794	0.00469298	0.0103174
193	Sme_HFn_F03_02uM	0.875509	0.884725	0.0373838	0.126665	0.0747254	0.113268
194	Sme_HFn_F04_02uM	0.173108	0.205165	0.00106385	0.0082808	0.000143799	0.000517677
195	Sme_HFn_F04_06uM	0.0477663	0.0622475	0.161756	0.303404	0.00257912	0.00603891
196	Sme_HFn_F04_10uM	0.863863	0.878842	0.0232074	0.0868018	0.106992	0.153302
197	Sme_HFn_F05_02uM	0.0274182	0.0367276	0.891805	0.928285	0.0194368	0.0370715
198	Sme_HFn_F06_02uM	0.845157	0.869304	0.00235531	0.0147951	0.00979061	0.0199978
199	Sme_HFn_F07_02uM	0.00231971	0.00361122	0.824123	0.879064	0.0011932	0.00315268
200	Sme_HFn_F08_02uM	0.852815	0.87325	0.00714292	0.0337239	0.0526065	0.0846407
201	Sme_HFn_F09_02uM	0.544122	0.589125	0.123481	0.268229	0.554341	0.628326
202	Sme_HFn_F09_06uM	0.882559	0.888731	0.305973	0.447983	0.51726	0.600689
203	Sme_HFn_F10_02uM	0.454051	0.501022	0.00185233	0.0133368	0.0814939	0.122881
204	Sme_HFn_F10_06uM	0.639346	0.672013	0.944076	0.964163	0.595925	0.6501
205	Sme_HFn_F11_02uM	0.325169	0.374595	0.105065	0.254276	0.0259882	0.0473709
206	Sme_A_F01_02uM	7.74413e-05	0.000156939	0.125687	0.268229	0.00278537	0.00636656
207	Sme_A_F02_02uM	8.30043e-07	4.51042e-06	0.267923	0.414849	2.36608e-08	2.43302e-06
208	Sme_A_F02_06uM	6.32216e-05	0.000130056	0.140747	0.289538	8.14368e-07	1.72464e-05
209	Sme_A_F03_02uM	0.000226449	0.000415397	0.172912	0.315181	4.62097e-06	4.03285e-05
210	Sme_A_F03_06uM	8.61496e-06	2.58449e-05	0.63472	0.728609	1.72405e-06	2.36441e-05
211	Sme_A_F03_10uM	0.019819	0.0271803	0.89283	0.928285	0.0138449	0.0271246
212	Sme_A_F04_02uM	0.08139	0.101473	0.470114	0.58359	0.220851	0.286509
213	Sme_A_F04_06uM	0.00178283	0.00283941	0.998248	0.998248	0.0015209	0.00380886
214	Sme_A_F04_10uM	3.38702e-07	2.57517e-06	0.852958	0.899824	4.12392e-07	1.07972e-05
215	Sme_A_F04_20uM	5.96657e-07	3.90539e-06	0.346127	0.481539	2.74791e-08	2.43302e-06
216	Sme_A_F05_02uM	0.00682369	0.00992537	0.840752	0.890208	0.00922445	0.018976
217	Sme_A_F05_06uM	9.35312e-07	4.78218e-06	0.658946	0.744222	2.38826e-06	2.37178e-05
218	Sme_A_F05_10uM	6.64335e-07	4.07082e-06	0.642593	0.728609	1.80682e-06	2.36529e-05
219	Sme_A_F06_02uM	3.3978e-07	2.57517e-06	0.451525	0.575394	2.10161e-06	2.37178e-05
220	Sme_A_F06_20uM	1.39115e-05	3.7444e-05	0.591739	0.701321	4.57378e-05	0.000190906
221	Sme_A_F07_02uM	7.23469e-06	2.35673e-05	0.622384	0.722768	1.36792e-06	2.18868e-05
222	Sme_A_F07_06uM	7.04219e-05	0.00014384	0.447229	0.575394	7.08165e-06	4.97443e-05
223	Sme_A_F08_02uM	5.6674e-07	3.79584e-06	0.107959	0.256959	3.8226e-05	0.000161898
224	Sme_A_F09_02uM	3.48272e-06	1.31977e-05	0.497865	0.603431	3.74465e-07	1.07972e-05
225	Sme_A_F09_06uM	2.67736e-05	6.37255e-05	0.779886	0.859794	9.70304e-06	6.11497e-05
226	Sme_A_F10_02uM	2.38083e-05	5.81084e-05	0.133239	0.280093	2.57434e-07	1.05916e-05
227	Sme_A_F10_06uM	0.000397725	0.000681814	0.470081	0.58359	5.07884e-05	0.000208958
228	Sme_A_F10_10uM	1.26246e-05	3.5646e-05	0.600177	0.708406	2.23525e-06	2.37178e-05
229	Sme_A_F11_02uM	1.72167e-06	7.64244e-06	0.929521	0.956078	1.62834e-06	2.34481e-05
230	Sme_N_F01_02uM	1.31293e-05	3.67111e-05	0.00041918	0.0038956	0.0567501	0.0893117
231	Sme_N_F02_02uM	2.00805e-05	4.98549e-05	0.488087	0.595631	2.25213e-06	2.37178e-05
232	Sme_N_F02_06uM	2.92234e-05	6.67964e-05	0.77505	0.858517	1.04431e-05	6.27713e-05
233	Sme_N_F03_02uM	7.57962e-10	2.18293e-07	0.153247	0.298002	3.37919e-08	2.43302e-06
234	Sme_N_F03_06uM	9.23471e-09	5.79611e-07	0.307974	0.447983	1.2406e-07	5.95488e-06
235	Sme_N_F04_02uM	1.75237e-05	4.50611e-05	0.128405	0.271916	0.000726379	0.00201151
236	Sme_N_F04_10uM	0.0011909	0.00194874	0.0625652	0.185761	0.0508449	0.0832007
237	Sme_N_F05_02uM	0.0126346	0.01775	0.0187603	0.0750413	0.463683	0.547298
238	Sme_N_F05_60uM	1.77409e-06	7.64244e-06	0.162077	0.303404	6.34109e-05	0.000250169
239	Sme_N_F06_02uM	9.46473e-07	4.78218e-06	0.0298772	0.104934	0.000286016	0.000895354
240	Sme_N_F06_06uM	1.95418e-07	2.12819e-06	0.0708408	0.196174	2.4346e-05	0.000114945
241	Sme_N_F06_10uM	1.53896e-07	1.92704e-06	0.147442	0.294885	7.00307e-06	4.97443e-05
242	Sme_N_F06_20uM	3.93791e-07	2.76614e-06	0.0933318	0.23738	3.29611e-05	0.000146043
243	Sme_N_F07_02uM	7.79245e-05	0.000156939	0.16232	0.303404	0.00204697	0.004996
244	Sme_N_F07_06uM	1.0979e-06	5.35925e-06	0.231797	0.386118	2.30365e-05	0.000110575
245	Sme_N_F07_10uM	2.96841e-05	6.73151e-05	0.138161	0.288336	0.00106262	0.00286014
246	Sme_N_F07_20uM	0.00017649	0.000334403	0.120686	0.268229	0.00592859	0.0126477
247	Sme_N_F07_60uM	0.000203062	0.000382234	0.143177	0.290387	0.0055027	0.0119156
248	Sme_N_F08_02uM	7.87343e-08	1.33385e-06	0.122233	0.268229	4.82198e-06	4.0845e-05
249	Sme_N_F08_06uM	1.02341e-05	3.00757e-05	0.0540446	0.165583	0.00123847	0.00324255
250	Sme_N_F08_10uM	2.27265e-07	2.33758e-06	0.153179	0.298002	9.64586e-06	6.11497e-05
251	Sme_N_F09_02uM	8.83806e-07	4.62793e-06	0.338882	0.480778	9.59695e-06	6.11497e-05
252	Sme_N_F09_06uM	8.44195e-06	2.58449e-05	0.224613	0.380521	0.000169396	0.00059457
253	Sme_N_F09_10uM	1.75306e-06	7.64244e-06	0.163291	0.303404	6.20178e-05	0.000250169
254	Sme_N_F10_02uM	8.32243e-06	2.57727e-05	0.0835832	0.222888	0.00063107	0.00179949
255	Sme_N_F10_06uM	1.32242e-06	6.34761e-06	0.239649	0.391317	2.60962e-05	0.000119297
256	Sme_N_F11_02uM	1.79032e-05	4.56293e-05	0.296261	0.447983	0.000221639	0.000725364
257	Sme_N_F12_02uM	0.000118736	0.000232626	0.632285	0.728609	2.67926e-05	0.000120567
258	Sme_N_F13_02uM	1.82397e-07	2.10122e-06	0.125562	0.268229	1.04619e-05	6.27713e-05
259	Sme_N_F13_10uM	6.33344e-07	3.96528e-06	0.664394	0.747444	1.58042e-06	2.34481e-05
260	Sme_N_F14_02uM	1.33905e-07	1.75294e-06	0.57714	0.689694	4.72688e-07	1.13445e-05
261	Sme_N_F14_10uM	1.23174e-05	3.51228e-05	0.639519	0.728609	3.37889e-05	0.000147442
262	Sme_N_F15_02uM	0.803206	0.829116	0.605268	0.711498	0.513236	0.59843
263	Sme_N_F16_02uM	2.71488e-06	1.0566e-05	0.300863	0.447983	3.55091e-05	0.000152636
264	Sme_N_F16_10uM	2.99707e-05	6.74341e-05	0.451206	0.575394	0.000171352	0.00059457
265	Sme_N_F17_02uM	0.000680145	0.00113226	0.0124177	0.0541864	0.104523	0.150566
266	Sme_N_F17_06uM	7.50742e-06	2.37598e-05	0.0308878	0.107177	0.0016849	0.00416297
267	Sme_N_F17_10uM	1.98823e-05	4.97921e-05	0.0769457	0.211051	0.00149836	0.00380886
268	Sme_N_F17_20uM	1.37358e-05	3.7444e-05	0.0665903	0.189881	0.0012747	0.00330734
269	Sme_N_F18_02uM	1.02199e-06	5.0747e-06	0.342132	0.481539	1.08689e-05	6.37403e-05
270	Sme_N_F18_06uM	1.46108e-06	6.89821e-06	0.2542	0.404474	2.60488e-05	0.000119297
271	Sme_N_F18_10uM	1.07421e-05	3.09374e-05	0.231602	0.386118	0.000202687	0.000670964
272	Sme_N_F18_20uM	1.68609e-06	7.64244e-06	0.375318	0.505102	1.4886e-05	8.08898e-05
273	Sme_N_F19_02uM	3.88546e-07	2.76614e-06	0.125732	0.268229	2.15832e-05	0.000109052
274	Sme_N_F19_60uM	4.97654e-06	1.71935e-05	0.112244	0.262183	0.000274948	0.000879834
275	Sme_N_F20_02uM	2.04929e-05	5.04441e-05	0.483973	0.593125	0.000103126	0.000380773
276	Sme_N_F20_06uM	2.77986e-07	2.42606e-06	0.374201	0.505102	2.53472e-06	2.43333e-05
277	Sme_N_F20_10uM	5.01477e-06	1.71935e-05	0.569408	0.68329	1.81988e-05	9.35939e-05
278	Sme_N_F20_20uM	7.80608e-06	2.44364e-05	0.304561	0.447983	9.60183e-05	0.00036871
279	Sme_N_F21_02uM	3.4097e-08	7.28107e-07	0.0933677	0.23738	3.13521e-06	2.91272e-05
280	Sme_N_F21_06uM	6.15796e-06	2.08646e-05	0.0509526	0.159154	0.000847024	0.00232327
281	Sme_N_F22_02uM	1.18042e-07	1.61886e-06	0.109889	0.259411	8.31903e-06	5.70447e-05
282	Sme_N_F23_02uM	3.01364e-07	2.55273e-06	0.447841	0.575394	1.89798e-06	2.37178e-05
283	Sme_N_F23_10uM	1.84589e-06	7.70458e-06	0.482584	0.593125	9.76697e-06	6.11497e-05
284	Sme_N_F24_02uM	6.281e-07	3.96528e-06	0.169122	0.310237	2.21175e-05	0.000109825
285	Sme_N_F25_02uM	0.000371778	0.000645013	0.0972453	0.239373	0.0138394	0.0271246
286	Smw_F01_2uM	0.328368	0.375278	0.460407	0.579028	0.120058	0.168668
287	Smw_F02_2uM	5.73809e-08	1.03286e-06	0.0918019	0.23738	5.32355e-06	4.14374e-05
288	Smw_F03_2uM	1.1434e-07	1.61886e-06	0.901125	0.93354	1.14766e-07	5.95488e-06
