# Supplementary material for: Major human schistosome species express different glycans with immunological and diagnostic implications.
Source: Research Square preprint supplement (doi:10.21203/rs.3.rs-7103573/v1), 2025-07-30
Supplement: Supplementary file 4 [file 4a96325e02723e5ba444dcf5.xlsx]

## Sheet: Cercariae (PNGase F)
S. haematobium cercariae - N-glycans
Th. m/z1	Composition2	Proposed structure3	HF4				Digestion5					In Figure6
			Treatment product composition	Exp m/z			Exoglycosidase	Treatment product composition	Exp m/z
				Untreat.	+HF	Δm/z			Undig.	+Enzyme	Δm/z
1014.38	F1H2N2-AA		NS				α1-2,3,6 mannosidase	F1H1N2-AA	1014.33	-	-	S5.A
1176.43	F1H3N2-AA		NS				α1-2,3,6 mannosidase	F1H1N2-AA	1176.37	-	-	S5.A
1308.47	F1H3N2X1-AA		NS				α1-2,3,6 mannosidase	F1H1N2X1-AA	1308.4	984.501	323.902	S5.A
1354.48	H5N2-AA		NS				α1-2,3,6 mannosidase	H1N2-AA	1354.4	-	-	S5.A
1379.47	F1H3N3-AA		NS				α1-2,3,6 mannosidase β-GlcNAcase	F1H2N3 F1H3N2-AA	1379.43	1217.619 1176.561	161.816 202.874	S5.A
1516.53	H6N2-AA		NS				α1-2,3,6 mannosidase	H1N2-AA	1516.43	-	-	S5.A
1525.57	F2H3N3-AA		F1H3N3-AA	1525.68	1379.6	146.086	NS					S5.A
1541.56	F1H4N3-AA		NS				β1-4 galactosidase + β-GlcNAcase	F1H3N2-AA	1541.47	1176.56	364.91	S5.A
1582.59	F1H3N4-AA		NS				β-GlcNAcase	F1H3N2-AA	1582.49	1176.56	405.929	S5.A
1678.58	H7N2-AA		NS				α1-2,3,6 mannosidase	H1N2-AA	1678.46	-	-	S5.A
1687.62	F2H4N3-AA		F1H4N3-AA	1687.75	1541.66	146.088	NS					S5.A
1744.64	F1H4N4-AA		NS				β1-4 galactosidase + β-GlcNAcase	F1H3N2-AA	1744.52	1176.56	567.961	S5.A
1840.64	H8N2-AA		NS				α1-2,3,6 mannosidase	H1N2-AA	1840.51	-	-	S5.A
1890.7	F2H4N4-AA		F1H4N4-AA	1890.85	1744.75	146.098	β1-4 galactosidase + β-GlcNAcase	F2H4N3-AA	1890.57	1687.81	202.76	S5.A
1906.7	F1H5N4-AA		NS				β1-4 galactosidase + β-GlcNAcase	F1H3N2-AA	1906.56	1176.56	729.996	S5.A
2002.69	H9N2-AA		NS				α1-2,3,6 mannosidase	H1N2-AA	2002.53	-	-	S5.A
(1) Th. m/z		Theoretical m/z of the AA-labeled glycan in negative ion mode [M-H]-
(2) Composition		Determined glycan composition: AA= AA label, H = Hexose, N= N-acetylhexosamine, F = Fucose, X = Xylose
(3) Proposed structure		based on structural characterization performed using MALDI-TOF-MS, glycan sequencing techniques and information from literature
		Structures are represented using the CFG nomenclature:
(4) HF		Treatment with hydrofluoric acid, structural changes resulting from the treatment and corresponding experimental (exp.) m/z are detailed - NS = Not sensitive to treatment
(5) Digestion		Treatment with specified exoglycosidases, structural changes resulting from the treatment and corresponding experimental (exp.) m/z are detailed - NS = not sensitive to treatment
(6) In figure		Figure showing experimental data corresponding to HF and exoglycosidase treatments

## Sheet: Adult Worms (PNGase F)
S. haematobium adult worms - N-glycans
Th. m/z1	Composition2	Proposed structure3	Digestion4					In Figure5
			Exoglycosidase	Treatment product composition	Exp m/z
					Undig.	+Enzyme	Δm/z
1014.38	F1H2N2		NS					S5.B
1176.43	F1H3N2		NS					S5.B
1308.47	F1H3N2X1		NS					S5.B
1354.48	H5N2		NS					S5.B
1379.47	F1H3N3		β-GlcNAcase	F1H3N2	1379.45	1176.52	202.934	S5.B
1436.56	H3N4		β-GlcNAcase	H3N2	1436.47	1030.47	405.998	S5.B
1516.53	H6N2		NS					S5.B
1582.59	F1H3N4		β-GlcNAcase β-HexNAcase	F1H3N2 F1H3N3	1582.51	1176.515 1379.574	405.998 202.939	S5.B
1678.58	H7N2		NS					S5.B
1840.64	H8N2		NS					S5.B
1906.7	F1H5N4		β1-4 galactosidase + β-GlcNAcase	F1H3N2	1906.6	1176.54	730.054	S5.B
2002.69	H9N2		NS					S5.B
(1) Th. m/z		Theoretical m/z of the AA-labeled glycan in negative ion mode [M-H]-
(2) Composition		Determined glycan composition: AA= AA label, H = Hexose, N= N-acetylhexosamine, F = Fucose, X = Xylose
(3) Proposed structure		based on structural characterization performed using MALDI-TOF-MS, glycan sequencing techniques and information from literature
		Structures are represented using the CFG nomenclature:
(4) Digestion		Treatment with specified exoglycosidases, structural changes resulting from the treatment and corresponding experimental (exp.) m/z are detailed - NS = not sensitive to treatment
(5) In figure		Figure showing experimental data corresponding to exoglycosidase treatments

## Sheet: Eggs (PNGase F)
S. haematobium eggs - N-glycans
Th. m/z1	Composition2	Proposed structure3		HF4				Digestion5					In Figure6
				Treatment product composition	Exp m/z			Exoglycosidase	Treatment product composition	Exp m/z
					Untreat.	+HF	Δm/z			Undig.	+Enzyme	Δm/z
1176.43	F1H3N2			NS				NS					S5.C
1308.47	F1H3N2X1			NS				NS					S5.C
1354.48	H5N2			NS				NS					S5.C
1379.47	F1H3N3			NS				β-GlcNAcase	F1H3N2	1379.44	1176.53	202.91	S5.C
1436.56	H3N4			NS				β-GlcNAcase	H3N2	1436.45	1030.46	405.987	S5.C
1511.55	F1H3N3X1			NS				β-GlcNAcase	F1H3N2X1	1511.46	1308.58	202.884	S5.C
1516.53	H6N2			NS				NS					S5.C
1541.56	F1H4N3			NS				β1-4 galactosidase + β-GlcNAcase	F1H3N2	1541.47	1176.53	364.949	S5.C
1582.59	F1H3N4			H3N4	1582.5	1436.62	145.88	β-GlcNAcase	F1H3N2	1582.5	1176.53	405.971	S5.C
1678.58	H7N2			NS				NS					S5.C
1714.63	F1H3N4X1			NS				β-HexNAcase β-GlcNAcase	F1H3N3X1 F1H3N2X1	1714.53	1511,684 1308,581	202,843 405,946	S5.C
1785.67	F1H3N5			H3N4X1	1714.53	1568.62	145.911	β-HexNAcase β-GlcNAcase	F1H3N4 F1H3N2	1785.56	1582,728 1176,526	202,831 609,033	S5.C
1840.64	H8N2			NS				NS					S5.C
1906.7	F1H5N4			NS				β1-4 galactosidase + β-GlcNAcase	F1H3N2	1906.58	1176.53	730.049	S5.C
1917.71	F1H3N5X1			NS				β-HexNAcase β-GlcNAcase	F1H3N4X1 F1H3N4X1	1917.57	1714,783 1714,772	202,791 202,802	S5.C
2002.69	H9N2			NS				NS					S5.C
(1) Th. m/z		Theoretical m/z of the AA-labeled glycan in negative ion mode [M-H]-
(2) Composition		Determined glycan composition: AA= AA label, H = Hexose, N= N-acetylhexosamine, F = Fucose, X = Xylose
(3) Proposed structure		based on structural characterization performed using MALDI-TOF-MS, glycan sequencing techniques and information from literature
		Structures are represented using the CFG nomenclature:
(4) HF		Treatment with hydrofluoric acid, structural changes resulting from the treatment and corresponding experimental (exp.) m/z are detailed - NS = Not sensitive to treatment
(5) Digestion		Treatment with specified exoglycosidases, structural changes resulting from the treatment and corresponding experimental (exp.) m/z are detailed - NS = not sensitive to treatment
(6) In figure		Figure showing experimental data corresponding to HF and exoglycosidase treatments

## Sheet: Mature Eggs (PNGase A)
S. haematobium eggs - N-glycans
Th. m/z1	Composition2	Proposed structure3		Digestion4					In Figure5	MALDI-TOF-MS/MS6
				Exoglycosidase	Treatment product composition	Exp m/z
						Undig.	+Enzyme	Δm/z
1379.47	F1H3N3			β-GlcNAcase	F1H3N2	1379.42	1176.4	203.018	S5.E	-
1541.56	F1H4N3			NS					S5.E	-
1582.59	F1H3N4			β-GlcNAcase	F1H3N2	1582.47	1176.4	406.072	S5.E	-
1657.61	F2H3N3X1			β-GlcNAcase	F2H3N2X1	1657.49	1454.49	203.001	S5.E	-
1714.63	F1H3N4X1			β-HexNAcase β-GlcNAcase	F1H3N3X1 F1H3N2X1	1714.5	1511.475 1308.581	202.026 405.957	S5.E	-
1728.65	F1H3N4X1			β-HexNAcase β-HexNAcase + β-GlcNAcase	F1H3N3X1 F1H3N2X1	1728.52	1525,492 1322,456	203,024 406,060	S5.E	-
1760.58	H5N4			NS					S5.E	-
1860.69	F2H3N4X1			β-HexNAcase β-HexNAcase + β-GlcNAcase	F2H3N3X1 F2H3N2X1	1860.55	1657.522 1454.522	203.025 406.025	S5.E	S5.F
1906.7	F1H5N4			NS	F1H3N2	1906.58	1176.53	730.049	S5.E	-
1917.71	F1H3N5X1			β-HexNAcase β-GlcNAcase β-HexNAcase + β-GlcNAcase	F1H3N4X1 F1H3N4X1	1917.56	1714,783 1714,772 1308,438	202,781 202,792 609,126	S5.E	-
2052.69	F2H5N4			NS					S5.E	-
2063.79	F2H3N5X1			β-HexNAcase β-HexNAcase + β-GlcNAcase	F2H3N4X1 F2H3N2X1	2063.61	1860.586 1454.489	203.027 609.124	S5.E	-
2120.79	F1H3N6X1			β-HexNAcase β-HexNAcase + β-GlcNAcase	F1H3N4X1 F1H3N2X1	2120.63	1714.537 1308.438	406.092 812.191	S5.E	-
2198.81	F3H5N4			NS					S5.E	-
2266.85	F2H3N6X1			β-HexNAcase β-HexNAcase + β-GlcNAcase	F2H3N6X1 F2H3N6X1	2266.69	1860.547 1454.489	406.145 812.203	S5.E	-
(1) Th. m/z		Theoretical m/z of the AA-labeled glycan in negative ion mode [M-H]-
(2) Composition		Determined glycan composition: AA= AA label, H = Hexose, N= N-acetylhexosamine, F = Fucose, X = Xylose
(3) Proposed structure		based on structural characterization performed using MALDI-TOF-MS, glycan sequencing techniques and information from literature
		Structures are represented using the CFG nomenclature:
(4) Digestion		Treatment with specified exoglycosidases, structural changes resulting from the treatment and corresponding experimental (exp.) m/z are detailed - NS = not sensitive to treatment
(5) In figure		Figure showing experimental data corresponding to exoglycosidase treatments
(6) MALDI-TOF-MS/MS		Figure in which MALDI-TOF-MS/MS analysis of the ion species is displayed, when applicable
