# Supplementary material for: Major human schistosome species express different glycans with immunological and diagnostic implications.
Source: Research Square preprint supplement (doi:10.21203/rs.3.rs-7103573/v1), 2025-07-30
Supplement: Supplementary file 5 [file 50773a66125ac0a300be982d.xlsx]

## Sheet: IgM
		S. haematobium infected																			S. mansoni infected																						Non-endemic sera
Fraction ID	Fraction Name	Sh_1	Sh_2	Sh_3	Sh_4	Sh_5	Sh_6	Sh_7	Sh_8	Sh_9	Sh_10	Sh_11	Sh_12	Sh_13	Sh_14	Sh_15	Sh_16	Sh_17	Sh_18	Average	Sm_1	Sm_2	Sm_3	Sm_4	Sm_5	Sm_6	Sm_7	Sm_8	Sm_9	Sm_10	Sm_11	Sm_12	Sm_13	Sm_14	Sm_15	Sm_16	Sm_17	Sm_18	Sm_19	Sm_20	Sm_21	Average	Uninf_1	Uninf_2	Uninf_3	Uninf_4	Uninf_5	Uninf_6	Uninf_7
1	Blk1	1393.67	1043.67	0	0	0	0	0	2372	4027.33	10165.7	348.667	0	3353.33	0	16391	0	0	1181.67	1592.4	0	0	0	0	0	740.667	0	0	0	0	0	0	0	1316	322.667	0	48.6667	0	0	0	0	121.4	0	0	0	0	0	0	0
2	Blk2	0	1419.67	0	0	0	0	0	0	0	862.333	187.667	0	854.667	0	0	1294.33	0	1820.67	343	0	0	0	1144.33	0	2577.67	0	182.333	0	0	0	38002.7	0	0	507.333	0	1194.33	2864	0	980	1130.33	2372.63	0	615.333	0	0	0	4193	406.333
3	Blk3	0	1069	0	5384.67	4291.33	0	3489.67	0	0	0	0	6329	0	8505	7168.67	9322.33	0	2469	1680.58	28692.2	1633	14589.5	0	165.5	0	5661.67	3696	0	4219	0	6992.33	210.333	1404.67	0	0	0	2085.67	0	0	0	3467.49	0	0	333.333	2442.33	430.667	1843	1091
4	Blk4	2258.67	0	360.667	0	0	0	0	0	0	1463.67	0	0	0	0	0	0	2078.67	0	410.778	0	0	0	0	0	0	0	838	0	0	3	5209.33	2214	0	736	253	0	0	0	0	0	462.667	0	561.333	842	0	0	20	0
5	Blk5	0	924.333	0	9214	4485.67	126.333	2388	5948	13270.7	9535	1941	0	11832.3	0	3979	0	0	4914	4305.29	4449.33	0	0	0	0	2113	1205	6282.67	14679.7	785.333	2085.67	0	4327.67	0	0	13032	0	661.333	3871.33	2352	0	2792.25	0	1317.33	0	518.333	0	2930.67	0
6	Blk6	65.3333	0	34	0	0	3989.33	35.3333	314	10	0	0	4070.67	0	0	0	3407.67	5549	0	666.467	0	0	0	3580.67	1696.67	0	0	0	648.667	0	134.333	0	0	0	0	1991.33	0	0	674	0	1623.33	436.283	200.333	0	7.66667	0	1193	0	272.667
7	Blk7	0	0	0	54106	14605.3	8904.5	2465	0	621	0	414.667	17885	0	12741.3	17800.7	0	12018.3	0	7058.41	56527.3	3356	0	11740.5	1975.5	0	7409.33	0	39604	11634.7	1065.67	0	0	3945.33	0	17378.3	0	307.333	35161.3	62389.3	92.6667	12624.7	0	334.667	0	1259.67	823	0	0
8	Blk8	12.6667	0	705.333	0	0	0	0	4946.67	0	0	0	17219.3	0	6373	0	11646.7	6052	0	1205.98	0	44.6667	0	3442.67	1450.33	0	0	0	290.333	2565	0	0	0	2421.33	212	0	0	0	0	0	915.667	521.317	0	0	343	2056.67	360.333	0	45.3333
9	Blk9	0	0	536.333	6823	3244.67	6893.67	0	0	0	0	0	0	5164	674.333	0	0	0	0	1555.73	4254.33	1957.67	3077.67	0	0	2077.33	5285.33	0	0	0	0	8275	13989.3	3786	0	0	2992.33	0	2895.33	13786	0	3118.82	89	0	0	0	0	0	0
10	Crude Ag ShCA	61664.3	60533.3	57877	56085.3	14690	59402.3	46975	47961	59914.3	55070.7	47001	16144.3	59626	21868.7	19589.3	14323	34312.7	59855.7	49522.5	48135.7	45430	50820.3	51262.7	37108.7	51393.7	43621.7	59969.3	32308.7	54461.7	54004.3	49357	52143.3	0	24460.3	51838	54713.3	13277	52613	48920.7	13409.3	43792	36885.3	7263.33	18319.7	10781.7	786.667	50188.3	227
11	Crude Ag ShSEA	60100	37123	50226.7	56044	22504.7	53816.7	33933.3	34089.7	59381	49724	23542	10574	58834	29164	18068.7	0	6718.67	46921	41474.8	48278.3	3367.33	48425	0	10811	60472.7	14089	44064.7	14583	4813.67	11221.3	32029.3	52754.7	4935.67	12314	51690	51308.7	13145.3	55227	53356.7	0	29344.4	8853.33	1918.33	696	8267	4394.33	15507.7	0
12	Crude Ag SmCA	61757	58387.3	58583	57235.7	13175.3	57803	50729.3	47776.7	60293.3	56129.3	46223	17540.7	55475.7	6018.67	20465.7	531.333	17847.3	58912.3	47089.8	51050	19662	52257	28708	31095	59847.7	46419	48302	33058.5	54977.3	54127.3	54386.3	54261	7195.33	20401	54281.8	55824.3	16086.7	53825.3	47976	4925.67	42187.1	15855.7	4227.33	4384	2928.33	0	34523.7	0
13	Crude Ag SmSEA	62108.7	54591.3	60563.3	58183.7	12019	60212.7	43905	25145.7	60826.7	55404.3	53466.7	17464.7	59937.3	0	20792.3	23599	42463.7	60266	47272.9	53368	4050	50255.7	27415.3	21885	59664.3	30182.3	60456.3	34917.3	54823.3	5168.33	15065.7	55348.3	9450.67	8761.33	55591	58495.7	15363.7	57709.7	51020.3	1143.67	36449.6	18432.3	4622.67	0	4130.67	0	2314.67	0
14	NG-1_2uM_x000D_	744	1067.33	0	0	0	1177.33	4208.33	6699	140.333	0	0	0	0	0	0	0	0	299.333	955.711	0	5640.67	0	0	2649.33	2138	24077	0	0	0	242	588.667	896.333	4790.67	571.333	21940.7	0	0	323.333	23214	0	4353.6	107.333	0	3468.67	1459.33	1655.67	0	0
15	NG-1_20uM_x000D_	9940	3291	9261.67	662.333	3845.33	13955.3	10802	14879.3	10333.7	2306.33	5942.33	0	9370.67	0	0	0	0	5984.67	6704.98	782	7809.33	13672	0	0	2822.33	29952.3	14549.3	0	0	35530	21658	7045	9972.33	0	50520	17992	15483.3	42294	52097.3	0	16109	12767	946.333	8633	723.333	0	13929.7	0
16	NG-10_2uM_x000D_	16987.7	1880.67	10138	16619.3	415.667	2153	354	17024	24094.7	22977.7	5030.67	16470.3	0	3487.67	21835	11621	30916.7	0	10138.6	9508.67	25572.3	0	0	8671	877.333	1597	0	25686.7	2428.67	35797	0	545.667	4731.33	1978	0	0	45.6667	13314	5773	6504.33	6826.32	0	0	225.667	8920.67	2120	1779	1384.67
17	NG-10_10uM_x000D_	30020	5631.67	30297	46691.3	0	17390.3	333.667	0	38713.7	47240.3	4828	0	14857.3	0	21186.3	0	0	14061.7	16671	26666.7	48794.3	0	0	10096	1354	6471	1233.33	0	6027.67	55588.3	484	146	5275	662.667	12875.7	0	4737.67	21394.7	38280.7	13446.3	12004.4	383.667	610.667	0	0	0	0	0
18	NG-11_2uM_x000D_	63065.3	5627.67	40402	59607.3	0	58451.3	2277	0	56056	53615.3	4509.67	19923.3	14101.3	0	21260.7	29323.7	22201.3	21301.3	26747.7	41426.7	0	0	4135	2103	7383	18192	495	27169.7	28834.7	0	0	0	20541	1065	802.667	4644.33	1194.33	41693	20735.7	0	11020.8	245.667	0	0	451.333	110.667	0	0
19	NG-11_10uM_x000D_	60983.7	23202	58315	59920.3	244.667	47491.3	13371.7	0	61446	48952.7	25633.3	21282	50064	0	21928.3	25478.7	39086.7	49020	35848.8	49799.7	0	1947	23274.3	7475	59719.7	23474.3	16191.7	29146	33742.3	793	1391.67	1392.33	2737.33	1448	16417.3	10256.3	6852	61278.3	55047.7	0	20119.2	147.333	2436.33	0	0	0	0	0
20	NG-12_2uM_x000D_	51471	22093.3	60680	59028.3	13436	52331	29164.3	16170	60918.3	54226.2	13513.7	20440	50451	6320	21208.3	26372.3	43820.7	45337	38597.4	54574.3	30191	21544	53179	30175	58256	43937.7	36066	37050.7	55084.7	9920.33	0	24329.3	0	34346	43520	29099.7	5797.33	40457.7	48237.3	0	32788.3	4904.67	776.667	0	1706.33	176	0	977
21	NG-13_2uM_x000D_	792	0	0	22612.3	1591.67	0	0	1276.33	0	0	0	0	0	977.333	0	0	0	0	1816.64	28622	1562	0	0	0	0	7187	1187.33	0	0	951.667	0	0	0	0	7421.67	0	0	5977.67	6783	0	2984.62	1797.67	229.667	0	266.667	0	0	0
22	NG-13_20uM_x000D_	21404	0	5746.67	57771.3	8028	13807	1311.33	0	26255.7	13262.7	0	10662	812.667	0	16916.7	0	2918.33	1219.67	10169.2	47540.3	0	0	1587.33	0	0	3058.67	0	0	1285	0	0	0	13251.7	0	7477	0	0	43960.3	21869.3	0	7001.48	0	0	0	1070	0	0	0
23	NG-15_2uM_x000D_	61107	12109	61199.5	60464	13389	59350.3	47859	32812.3	61131.7	58787.3	22532	21348.7	61053.3	30767	21227.3	18417.7	44499	55665	45515	57350.7	59182.7	45902	50683	23659.7	59527.3	61586.3	31068.3	36934.7	55843	23795.3	10372.3	2405.33	0	39419	56787.7	56123.3	5167.67	61449.3	56914.3	721.667	39708.6	14200.3	4560	0	2850.33	189	0	0
24	NG-2_2uM_x000D_	2681	1541.33	0	0	0	0	3343.67	2193.67	1517	0	356.667	5638.33	0	0	7545.67	0	2743.67	2314.67	1112.78	0	2619.67	369.333	0	0	0	62.3333	2970.33	0	0	8060.33	1654.33	1522.33	3983	10368.7	0	0	6112	0	2233.33	0	1997.78	0	0	1212.33	1339	358.333	0	0
25	NG-2_20uM_x000D_	7475	518.667	6115.33	0	2224.33	5589.33	11613.7	5333.33	10157.3	5002.33	5051.33	0	3367	0	0	0	0	680.667	4208.56	0	0	13169.3	0	0	301.333	1848.67	22246.7	0	0	38843	14608	36753.7	5283.67	10085.7	47233.3	10724.3	33905	14243.3	42492.7	0	14586.9	8631.33	347	7491.67	1775	0	17198	0
26	NG-3_2uM_x000D_	1375.67	1989.67	561	0	2986.67	3861	11617	5748.67	4561.67	1618	8536.67	0	12278	0	0	0	0	1274.67	3760.58	0	4731.33	16658.3	0	0	0	394.333	9795	0	0	34148.3	14312.7	5793	0	9034.67	29352	10008.3	43479.7	6052	30647.3	0	10720.4	9009.33	1267.67	4500.33	354.667	0	0	0
27	NG-3_20uM_x000D_	18270	4562	13570	9082.33	6276.67	32464.3	34080.7	10180.3	24698.3	9635	10415.3	0	21990	0	0	0	0	13388.3	13907.6	4060.67	11316.3	17222.3	0	0	5238.67	9526	13263	0	0	56205.7	38045	27945.7	0	5965	49249.7	37902	38227.7	19436.7	51351.3	0	19247.8	15916.3	2414	18690.3	4615.33	0	36966.7	0
28	NG-4_2uM_x000D_	51501	6189.33	2279.33	0	7064.67	1080.33	16737	52872.7	30090.3	33415.3	11551.3	19093.3	1248.33	0	0	5277.67	0	10580	14974	3434	8024.33	0	0	2159	2424	43986.7	3853.33	0	10640	37148.7	0	1379	2413.33	16421.3	0	0	7294.67	4568.33	15633.7	560.333	7969.02	0	0	642.333	5013.67	804	0	0
29	NG-4_20uM_x000D_	41960.7	11771	54682.7	31773.3	28898.7	26024.3	24363	49616	56343	47092.7	24813	21024.7	28102	0	0	48.3333	0	36543.7	30798.9	41762.3	16349	13833.3	0	16523	60665.7	52358.3	55255.7	0	20187.7	46725.3	15730.3	52922.3	2823.67	32077.7	9518	20066.3	39107.3	40885.7	34796.7	0	28579.4	1616.33	242.333	2458.33	3453.67	0	7662	0
30	NG-5_2uM_x000D_	40059.7	4370	49521.3	22945.3	0	30544	5131.67	3010	42392	50259.3	2954.33	19459	8412	0	16233.3	30717.7	35297	7666	20170.8	11037.7	12581.7	0	31811.3	2458.67	3107.33	28098.7	0	37452.3	28391.3	954	0	1074	2348	61717.7	4888.33	3669	20644	23199.3	40813	548.667	15712.3	353.667	120.333	2224.67	502.333	263.667	0	0
31	NG-5_10uM_x000D_	43906	22264.7	56772	40139.7	1419	44515	28755.7	12477	53440.3	50713.7	21368.3	20844.3	53993	0	21278.3	29229	24089.3	60202.3	34270.4	49777.3	28001	4968.33	33539	3917	57798	41190	40524.3	38858.3	54212.7	23061.7	0	28128	830	62701.3	32425.3	54669	51683.3	61249.3	57192.7	0	36236.3	4124	868.667	1329.67	450	0	0	1988
32	NG-7_2uM_x000D_	7589.67	0	0	2622.33	909.667	0	0	991	18270.7	3599	18.3333	0	0	0	0	790.667	0	1709.67	2380.69	8723	0	0	0	0	0	172	1431.67	0	0	22111.3	0	0	7629.33	15535.7	7341.67	0	3482.33	11466.3	6198	0	4204.57	0	380.667	136.333	0	0	0	0
33	NG-7_10uM_x000D_	19277.3	5076.67	7560.67	18755	4699.33	11880.3	8421.33	6893	34256	9057.33	3540	0	13702.7	0	0	0	0	30114.7	11549	34362	16152	0	0	0	0	13660.7	22450.7	5208.33	0	49348	13723.7	5811	4944	33519	43859.7	21996.7	43172	27726	50534.7	0	19323.4	0	512.667	2420.67	0	0	6065.67	0
34	NG-8_2uM_x000D_	16147.7	9251	0	4282	0	1720.67	720.333	2062.67	46373.3	3899.33	0	467.667	2173	0	0	0	0	317	5796.47	52316.7	1248.33	13930.7	0	785.333	1743	426	0	903.333	0	0	0	0	8251.67	0	2255.67	916.667	0	3454.33	15370.3	0	5080.1	0	0	0	0	1897.33	0	0
35	NG-8_6uM_x000D_	59213.7	26892.3	20974.3	40830.3	1147	9447.33	7723.33	0	61350.7	28299	8230.33	2609.67	36866	0	6870.67	0	0	37772	22583.1	45560.3	1107.67	29781	0	1741	28384.7	19436	18161.3	0	0	6508	0	2824	55012	0	49062.3	34557.7	3874.67	60377.3	54952	0	20567	0	102	0	0	0	2208.67	0
36	NG-9_2uM_x000D_	62905.3	15814.7	61879	57718	34273.3	59281	33719	57537.7	60808	52965.7	4359.67	21369	20650.3	5867.33	21195.7	27525.3	40395.3	37306	40365.4	53761.3	57740.7	17900	53587.5	16616	58075.3	47111.7	34626.3	39197	31862	53761.3	12787.3	7024.67	8103	33102.5	38639.3	18798.3	8763.33	43439	51941	22339.7	34341.9	0	1602.33	0	7326.67	1445.67	0	0
37	NG-A1_2uM	62224	16375.3	54072.3	59143.7	16483	47188.7	26717.7	55992.7	45372.7	52569	15678.7	23890.7	60756	0	21970	29013	44320	42990.3	39992.3	34917	62739.7	13540	54156.3	10368.3	50912.7	51261.7	59652.7	38374	15916	31517.7	3976.67	52270.3	1505	15535.7	38881.3	38414	11397.7	46970.3	33388	3496.33	33284.8	10476.7	99.3333	2699	0	0	0	2967.33
38	NG-A2_2uM	62929.7	33053.7	55669	60515	42808.7	52271.3	29798.7	50298.7	61748.3	56281.7	26758.3	20029	61568	0	22550	26139.3	41462	38027.3	44879.4	60201.7	41486.7	41076	48109.3	23165.7	41296	31526	48147.7	33989.3	36452.3	16679.7	21054	51737.3	7702.67	17377.3	39489.7	33998.7	14047	57785.3	62990.7	0	36415.6	8060.33	1158	1652.67	0	799.667	0	0
39	NG-A3_2uM	52050	55144.7	38949	56745	49245.3	54454	26906.7	56654.7	60607.3	56966.3	54347.3	21686.3	61169.7	7516	18657.3	25256	41330	56309.3	48559.7	57238	52543	48168.3	51251	15263	55860	55683	58395	34689.7	55233.7	57870.7	21871	42657.3	1871.67	50202.7	56783	45823.7	45726	60557	54605	565.333	46114.6	7228	3532.67	3589.33	2313	933.333	319.333	0
40	Oglyc_CA1_0.08uM	61687	19370.7	60144	56051.7	4923	58575	47111	56696.7	60422.3	55842.7	34968	13432	60846.3	41577	20347.7	23382	43195	59939	48090	48016.7	13542.7	30388.7	54261.7	60029.7	53805	40439.7	9765.67	33407.3	54827.3	28338.7	6994.33	54765	0	61611.7	44958.3	58860.3	1658	55105	47265.7	23969.7	37902.1	23441.7	4004.33	4008	12423.7	2506	3059.67	2812
41	Oglyc_CA2_0.602uM	48673	32332.3	61944.7	57625	5723	61758.3	36854.3	13977.7	56385.3	58809	25543	18790.3	60436.3	21402.3	21447.3	30674	34786.7	60606	42457.1	56496.7	4275.33	44164.7	43058	33360.7	49969	43530.7	17225	39512	56366.7	17482	28034.3	35295	0	20363.7	56386	62704.7	2195	53759.3	56807.7	11355	36049.3	17959.3	3014	1130	3307	0	42	0
42	Oglyc_CA3_1.04uM	39614.3	20808	58780.7	58260.3	13119	60212	19466.7	38168.3	35525.3	57554.7	18222.3	21747.7	39706.7	0	22621.7	27208.3	7801	61615.7	35257	55809.7	6115	42394.7	2129.33	6797.67	43621.3	35382	16321	38862.7	18595	9161	48873.3	44230.7	0	1947.67	53270	59187.3	4119.33	58000	52515.3	560	29866.7	3989.67	3054.67	1455.67	2770.67	0	19247	0
43	Oglyc_SEA_1_0.18uM	61791.7	7673	59605	59007.3	7141.33	59413	30165.7	4331.33	51009	58440	23674.7	21340.3	60090.3	0	16447	30210.3	43393.8	48360.3	38273.1	53874	0	15298.3	52813	9070.5	60225.7	4672	4064.17	37570.5	52824.7	5945	9580.67	14366	0	3565.5	55794.8	57345.7	5308.33	58976.3	52995.7	0	27714.5	6726	1617.67	1393.67	2785.67	0	0	0
44	Oglyc_SEA2_0.102uM	45020.7	2025.33	51933.3	31655.3	4261.67	10958	4411	17174.7	41730.7	43740.7	1106.17	4463.67	12621	0	22657	4636.67	5033.67	1461.83	18208.9	30974.3	5393.33	17364.7	4200.67	543.667	1675	14242	4284	37561.7	10467.7	11764.7	12884	10711.7	0	1942	40405	9003.67	0	24480.3	41923	0	13991.1	1763.33	116.667	2749.67	4260	0	8576	3999
45	Shc_F07_02uM	0	20083	0	200.667	0	0	0	0	0	11498	2271.67	7384.67	0	1232.67	0	0	0	54028.7	5954.31	0	0	0	0	0	0	0	569.333	0	33251	0	0	0	3621.33	0	0	0	3587.33	288.333	0	0	2065.87	446	44.3333	0	0	402.667	2271	0
46	Shc_F08_02uM	1733	12360.3	0	24055.3	0	2978.33	4904.67	0	35224.7	34530.3	6757	0	17654	0	2049	0	0	17213.7	10494.1	20759.3	3809	0	2653	313.667	4235	1260.67	3667	7992.33	5296.33	0	6476.67	23593.3	1367.67	1590.67	16358.7	27184.3	2372.33	8887.67	13769.7	168.333	7579.37	0	159	0	1797	0	3759.67	0
47	Shc_F09_02uM	8663.67	29558.7	27475	22198	640	15332.7	2505	16030	47933.3	55272	8343	17868.3	25622.3	30593.3	20444.7	23939.3	32519	60491.7	25545.2	40924	6253	33457	47941.7	22634.3	5795.67	21364	9073.33	36417.3	56256.3	0	3216.67	4475.67	4689	8785	22165	13893.3	12698.7	20844	44118	2806.33	20750.1	15190.7	687.333	0	3967.67	2424.67	2358	98
48	Shc_F10_02uM	27823.3	36716	58992.5	15470.3	2130	25859.3	0	0	34268.3	52122.3	9395.67	17590.3	25394	45881.7	15735.7	18643	7132.67	59773.3	26730.6	25116	582	23232	32951.3	4663	5032	22647.3	7198	33642	53294.7	1071.33	4634.33	1961.33	6499.33	8787	18189.3	34829.3	7668.67	3193.33	39324.7	1534.67	16725.9	9390.67	1691.67	0	1392.67	0	6256	82.6667
49	Shc_F11_02uM	20012.3	3146	0	0	21.3333	0	0	0	0	13971.3	241.333	5782.33	0	0	12774.3	0	0	17237	3641.96	0	0	0	0	0	0	790.667	0	0	49585.7	0	3805	855.667	3404.33	0	0	0.666667	1665.33	0	0	0	3005.37	0	11.3333	0	730	0	0	0
50	Shc_F12_02uM	3538.33	12813.7	2546	277.333	0	4828.33	0	0	16818	3465.33	3105.33	2285.33	13754	2206	0	0	0	4192	4502.96	1330	0	0	13831	427	1498.33	0	0	24026	34711.7	0	371.5	6286.67	10603.7	1677.67	7782.67	14411.7	0	0	8238	0	6259.79	0	0	0	200	365.333	167	314.667
51	Shc_F12_06uM	8031.33	29315	29452	5361.67	2841.67	17212.5	6613	5886.33	38370.3	44140.7	11903	23357.3	26429	34748.7	21970.3	22125.8	21763.3	60651.7	22848	48419.3	3109	27063.7	35226.5	13996.5	4122.33	16740.3	24781	36862.5	56505.7	5652	14953.7	5142.67	1528.33	30154	33709.8	20642.7	2640	23392.3	36245.3	982.667	22044.4	8025	1597.67	554.667	2925	2677.33	10024.3	298
52	Shc_F01_02uM	0	558	366.333	0	0	0	0	0	0	0	850.167	0	0	0	0	3968	0	1203.83	198.556	0	0	0	0	0	6564.33	0	7808	0	0	0	3500	7419.83	22809	127.333	17948.3	0	12725.7	0	0	0	3945.13	0	0	0	0	126.667	3295	0
53	Shc_F02_02uM	0	0	0	0	0	0	0	0	0	0	0	0	0	0	0	0	0	0	0	0	0	0	0	0	0	0	0	0	0	0	0	91.3333	7419	0	2859	0	0	48.6667	0	0	520.9	111.667	0	0	0	0	0	0
54	Shc_F02_06uM	12810.7	8911.5	16893.7	15878	3718	19076.7	7652.33	0	44961.3	55039.7	10504	17927.3	8359.33	0	19118.3	6307.67	527	39892	16281.6	9901.33	2013.33	8203.33	1452.33	1501.67	6200.67	628.667	10220.7	7658.33	11358	7531.67	30652	10498.3	3509.33	7967.33	44890.3	23089	18036.7	21025.3	13939	0	12013.9	0	968.333	2652.33	1267	0	5293	151.667
55	Shc_F03_02uM	0	22041.7	0	0	0	0	0	0	0	1043.33	1153.33	0	0	0	0	0	0	2286.33	1768.31	0	0	0	0	0	0	0	2230.33	0	16919.3	0	0	35.6667	9056.67	0	0	0	0	0	0	0	1412.1	0	0	0	0	0	0	0
56	Shc_F03_06uM	40279.7	46974.7	37149	21696.7	679.333	52018.7	33612.7	7520.33	42952.3	52501.3	29715.3	18345	41807	17857.3	19939.7	13773.7	36478.7	58659.7	34660.2	26054	11317.3	19944.3	47860	40278.3	35958.3	37607	47019.3	34701	54553.7	24365	6445	13529.7	0	10195.3	27341.7	47914	11571.3	13047	31398	2122.67	27055	16198.3	9590.33	4966.33	1725.33	162	3948.67	0
57	Shc_F04_02uM	1516	515	0	0	0	0	0	0	0	24721	1611.67	0	0	0	0	0	0	12574.3	2729.2	0	0	0	0	0	0	0	2390	0	10036	0	1875	0	38.6667	0	0	0	12889.7	508.667	559.333	0	1414.87	322	469	0	0	0	187.667	0
58	Shc_F05_02uM	16305.7	12511.5	25042	24934.3	1396.33	9295.33	469.333	0	21430.3	54010.3	4183.67	18839.7	24242	6927.33	19131.3	0	0	58150	17259.9	41103	0	6461	11150.7	754.667	4535.33	0	0	29822.7	54574.7	0	5319.67	2083	0	4410.67	39038.7	31175.3	2259.33	746	23021.3	0	12822.8	0	0	0	1018.33	47	0	0
59	Shc_F05_06uM	47876.3	33037.7	0	0	0	0	29965.3	50842.3	60840	54299	10118.7	18635.3	0	47512.7	20300.7	23572.3	43225	60470.3	29212.5	0	31180.3	0	53841.7	60800.3	0	39836	48230	33789.3	55691.7	53294.7	0	538.667	0	57610	0	0	3569	0	0	24751	21919.1	0	3694.67	8891.67	5992.33	3492	0	649
60	Shc_F06_02uM	0	16098.7	0	26996.7	0	5305.67	0	0	26015.3	9515.33	5480.67	0	43	0	0	0	0	30307.7	7984.2	7726.33	0	8707.67	0	0	3863	2270	9180.67	0	850	3211.67	31342	7722.67	5829	397.667	24932.3	33820.7	6107	29304.7	15977	0	9562.12	0	0	0	0	0	19935.7	0
61	She_HFa_F01_02uM	32677.7	7641.33	2604.33	30034.7	1880	3751.33	625.667	0	29601.7	41067.7	8044.33	21410.3	5690.33	39501	9725.67	14027.3	0	2063.33	13678.9	17135.3	1801	22399	0	0	4391.67	613	6745.67	0	4705.33	0	17313	1704.33	45962.3	1371.33	11786.7	9715.67	7901	20201.7	22339.3	242.667	9804.32	7168	238.333	1596.33	0	0	2921.33	10
62	She_HFa_F02_02uM	24262.3	13178	6009.67	17506	2249	10874	15235	16860.7	42688.7	43485.7	13454.7	18897	2568.67	42500.3	16927	17259	0	0	16724.8	19411.7	3920	18868.7	154	0	3831	9905.33	3757	0	0	2393.33	8420.67	5436.67	0	4001.33	16633.7	30603.3	936.667	24904.3	1902	1959.33	7753.98	13912	0	11385	0	0	18302	0
63	She_HFa_F02_06uM	34078.3	39436.3	12440.3	51981.7	57694.3	27770	26716.7	29330.7	58004	58710.3	53417.3	19616.7	54562.7	47578.7	17749.3	27431.7	0	22815	38302.4	42329	16725.7	51611	0	0	17638	29964	0	0	19069	26954.7	24036	26012.3	0	5549	30797.3	37428.3	15686.3	52097.7	40574.7	0	21823.7	3090.67	580.333	22187.3	0	0	2421.67	76.3333
64	She_HFa_F02_10uM	35892.7	46407.3	42075.3	49169.7	32390.3	39439.3	35585.7	22217	32565	55874.3	53109	18749	50279	47754.7	16806	18364.3	426	19943.7	37541.9	43857.3	23918	47972	0	0	32703	36383.3	12255.3	1635.67	17575.7	38996.7	48931	59353.7	1563	11085.3	48055.7	48900.3	18193.3	37356.7	28676	2421	27870.6	20144.3	313.333	6527.33	0	0	13105.3	238
65	She_HFa_F03_02uM	11054	35894.3	19915.3	24911	31869	7843	16150	31316.7	31503.3	40701.3	16417.3	21204.3	29915.7	18291	12626	16600.3	0	349	21075.4	40662.7	4497.67	2543	0	0	7314	2129	3874.67	0	17618.7	1162.33	6304.67	4375	0	3499.33	22832.7	39945.7	0	41966	20716.7	0	10972.1	8932.67	0	8818	486.667	0	9383.33	716.667
66	She_HFa_F03_06uM	50070.7	61911	5937	28455.3	26001.7	23721.3	10155.3	13778.7	44379.7	54656	60256.7	18202.3	41657.3	47001.7	20017.7	20040.7	0	6298	31618.7	22906.3	9161.67	31413	0	539.667	13695.3	8114.67	14304	0	15597	7207	13982.3	5588.33	3706	19120.3	45291.3	40007.7	10427.7	35591	31329.7	1093.67	16399.2	4534	165.667	3578.33	0	0	42429	0
67	She_HFa_F04_02uM	45548	17169	0	29813.3	13707.3	0	5323.33	6224	52891	48818.7	5660.67	16041	13884.3	32316.7	11823.3	2285.33	0	4037.33	18359.6	5078.33	553	34826	4113.67	0	5035	0	0	0	1417	1264	0	3619.67	5948	12099.3	6081.67	8112	0	36386.7	5133	1037.33	6483.37	6227.33	0	625.667	111	146.667	0	1107.33
68	She_HFa_F04_06uM	47919	34549	44202	43578	41842	27839.7	36290.7	32889.3	54487	58047.7	47474.3	17796.7	46636.3	46678	13222	17658.7	0	7047.67	37965.4	31220.7	21843.3	53502.7	2171	0	20152	51909.7	10969.7	0	7788.33	33240.3	49395.3	55310	2025.67	13279.3	41276.7	52022.7	2453.67	53030	32028	999.333	26681	36437.3	0	27338	0	0	4254.33	389.333
69	She_HFa_F04_10uM	25968.3	61978.7	39413.7	51894.3	36903.3	30223.7	25938	31618.3	49304	55127.3	59191.7	19108.7	44407.3	44723.7	22711.7	25144.3	0	24492.7	38745.7	57219.7	13931.3	27327.7	146	0	27797.7	34900.7	15783	461	23589	26370	40004.3	16786.7	5343.33	20435.3	42562	35909.7	6115.67	42566.7	28605.7	157.667	23292.8	38372.3	0	9590	215.333	0	29751.3	453.667
70	She_HFa_F05_02uM	31444	4765.67	677	11005.3	2439.67	5829	7254	0	46611.3	30767.3	6897.67	19335.7	4667.67	28371	15872	11727.3	0	0	12048.6	12811	0	0	281.333	0	3214.33	0	4549.33	0	1923	0	0	9061	8498.67	2386	6722.33	29412.3	0	35912.7	7635	172.333	6120.35	5356	0	863.667	0	0	810.333	470
71	She_HFa_F06_02uM	39412.7	17437	2004.33	36363.3	33318.7	1414	33773.3	26983.7	50349	34489	8384.33	19699.3	15300	42937	8530.33	11502	2669.67	6126	23397.5	29393.7	494.667	41538	542.667	465.333	5464.67	14507.7	0	0	271	0	1400.67	23280.3	3247	11510.3	5000.67	23265	0	40951.3	16877.7	166.333	10910.5	8325	0	0	0	0	0	0
72	She_HFa_F06_06uM	51865.3	24195.7	10394.7	58014.7	41673.7	14971.7	42032	32820.3	54858.3	50195	25032.3	18420.3	26697	47612.7	20211.3	20777.3	0	6152.33	32434.4	42193.7	15353	26976	702.333	804	17508	24916.7	5889.33	0	6233.33	22103	51798.7	44001.7	0	6047	27277	54965.7	0	48281.3	28727.7	234.333	21188.9	5030.67	0	12363.7	0	0	1107.33	293.667
73	She_HFa_F06_10uM	23717.3	39369	25125	39788.3	28783	24056	33875	52465.7	50229	53463.3	40110.7	19579.3	30660	47779	9749.33	14435.7	1663	15170.7	33750.3	45430.7	24546.3	41020	1991	3039	23370.7	44605.7	10735	3341	14336	17950	17794.7	20742.7	4645.33	3336	37849.7	37723.3	1961	46896	29276.7	1840.33	21529.5	28528.3	0	17723.3	0	0	22163	88.3333
74	She_HFa_F06_20uM	39566.7	38473.3	40660.7	45591.7	43305.7	41533	45808.3	46023.3	39554.3	58057	61834.3	18734	49454.3	47270	20254	14818.3	3901.33	3246.67	40285.4	53257.3	18937	38200	1616.67	4657.33	14515	31351.3	14995.7	0	22140.7	17727.3	34494.7	7078.33	41966.3	10067.3	26153	42925.3	8353	57160	26942.7	1845.33	23627	20596	0	13834	0	0	44097.3	634.667
75	She_HFa_F07_02uM	34994.7	12616.3	1832	26678.3	12817.7	6216.67	23663	8713	46660	13814.7	4708.67	19499.3	30753.3	17944.7	9161.67	6375	0	3399.33	16320.8	30875.7	2665.33	43260.7	1114	2374.67	7831.33	19228	0	0	5156.33	0	1641	17876	1815.67	13520	13860.7	51071.3	0	23335.3	17140.7	518	12638.3	2791.33	0	1884.33	399	127.333	386.333	0
76	She_HFa_F08_02uM	21947.3	11790.3	2705.33	6339.33	5937.33	3528.33	10514.3	6645.33	43215	39797	5351	20762.3	6009	32290	22813	23297.3	262.333	5252.67	13439	6386	373	8598.33	682	4597	9950.67	3622.33	9804.67	0	6555.33	1668.33	29085.3	21406.8	0	5638.67	17629.3	16368.3	9578.67	14844	12559	0	8967.39	0	2674.33	0	777.333	0	9982.67	7
77	She_HFn_F03_02uM	685.667	2290.67	0	9279.67	0	0	7848.33	5634	32920.3	24521.3	6632.67	17450	0	0	21527.7	0	0	8706.33	6567.93	0	8	26235.3	0	0	6302.33	940.667	5644	0	556.667	290.667	0	2159.67	2253.33	1096.67	4767.67	0	1248	0	0	0	2575.15	0	1016.67	2383	1295	479.667	10442.3	0
78	She_HFn_F04_02uM	21027.3	4099.67	0	6925.33	2301.67	0	0	0	20677	24314.3	4505.67	0	0	0	9918	0	0	3584.67	5829.04	0	0	0	553.667	3113	2842	176	3695	0	1149.67	0	0	736.333	3318.33	818	20093.7	0	2666	0	0	839.333	1958.08	111.667	529.333	0	0	0	3420.67	97
79	She_HFn_F05_02uM	5709	5694.33	363.667	2751	0	0	0	2331.33	10273	20678.3	3117.33	7114.33	5410.33	240	0	0	0	2880	3963.22	0	64.6667	451.333	1100	912	6850.33	10116	0	61.6667	4357	0	0	1109	4408.33	1155.33	3446.33	1054.67	476	5925.33	1050.33	354.667	2126.92	0	21.3333	0	4934	0	0	129.667
80	She_HFn_F05_06uM	48024.3	38374.3	26549.3	60739.3	12408	61579	19439.7	28154.3	58591.3	58754.7	46887.3	21579.3	8013.67	6828.33	21659.3	21202	0	61891.3	35749	59537.7	1442.33	56149	3964	42766.3	60923.3	28258.3	59322	38808.3	56412.3	41717.7	59777.7	62687.7	50795.3	20944	56874.3	27425.7	14336.3	19782.7	20051.7	3958.33	39098.8	5843	3602.67	1615	47292.3	1585.33	46726.7	395.333
81	She_HFn_F06_02uM	6002.67	5338.67	1659.33	2581	515.667	375.5	2918	895	27983.7	22919.7	2794.67	10254.7	1423	0	18.6667	0	0	0	5027.12	2786.33	0	0	0	35913	8377.67	545	2928.67	1097	7106.33	0	4025.67	3229.33	11141.7	3530.5	4949.33	0	534.667	2594.67	0	0	4437.99	0	0	654	2239.67	911	2356.33	28.6667
82	She_HFn_F06_06uM	33002	15334	8085	47611.8	12614.7	36761.3	0	0	38377.7	47225.7	15712.2	14283.7	20088.3	2315.5	19796	14849	3335.67	15568.3	19735.5	26391	5327.33	26765.5	0	33685	41541.7	13671.3	19354.7	0	9098	6406.33	22612	42219	4687.67	8788	36338.7	27079	1547.67	23837	19153.7	122.333	18425.2	523.667	1154.17	16869.3	18083.3	0	3408.67	174
83	She_HFn_F07_02uM	30714.7	18860.7	17308	36000.3	9624.33	20001	17946.3	7637	29206.3	32945	9517.67	6964.33	45576.3	0	0	0	0	13523.3	19257.4	28432	575.333	38793.7	2101	37542	26622.3	23462.7	0	434.667	30648	2740.33	31241	39635.3	1647.67	5427.67	26600.7	33598.7	1557	30210	11661.7	0	18646.6	282.333	0	479	9453	907.667	0	194
84	She_HFn_F08_02uM	36880.7	12859	2687.67	21021.7	4425.33	15840.7	1187.33	18233	21154	35976.3	5040.67	19436.7	6015	0	1851	0	0	0	12088.1	18162	41.3333	6575	1842	22677	11359.3	4727.33	7395	1095.5	8310.33	1168	1322.67	22688.8	22148.3	4278.67	15001.3	8687.33	704	12396.3	13330	804	9195.52	0	0	4163.33	5836.67	0	0	56.3333
85	She_HFn_F08_06uM	31611.3	32054.7	32773.7	42452	10222.7	34524.7	24168.7	26828	45432	58912	19650.7	20240.3	10281.7	3374	6050.67	428.333	0	16132.3	25894.6	37356.7	12765.3	40873.3	0	37564.3	61429	26906	48131.3	8175.67	31584	33342.3	15198.3	20602	6970.33	7218.67	47174	30156.3	2824.33	26247	33089.3	0	26380.4	13280	132.667	14484.7	36205.7	0	4741	287
86	She_HFn_F09_02uM	21145.7	2441.67	1404	6970.67	1025	829.667	1043.67	3534.33	38310	12377.7	2782	24017.7	7219.33	8128.33	18838.7	6453.67	0	250	7164.13	27594.3	0	126.333	0	0	3542.33	2538	0	0	842	3511	38238.7	4608.67	2862.33	738.667	7129	1020	6136	23316	1319.67	0	6176.15	83.3333	1153.33	1255	743	215.333	0	113.667
87	She_HFn_F10_02uM	38679	5165	2852.33	19164	1674.67	5625.67	726	2280.67	17731.7	42352.7	6422.33	20576.7	5999	2664.67	0	514	0	0	10089.2	8678	0	12079.7	1815.67	17147.7	12132.7	1313.67	9196.33	1040	21291	466	10369.3	29459.7	1508	3876.67	15136.3	8884.67	2049	21190.3	1181.33	1487	8940.8	6072.33	0	607.333	4590	0	135.667	148.333
88	She_HFn_F11_02uM	0	0	4407.33	7895.33	2043	2195	881	0	0	0	0	0	2926.33	0	0	0	0	0	1356.53	9290.33	53.3333	7834	0	1784	4179.67	214.333	0	0	0	84.3333	19716	3914.33	0	419.333	0	4993.67	0	21613	7571.33	0	4083.38	0	0	0	0	0	0	453.333
89	She_HFn_F12_02uM	21989.3	6993.33	4794	10272	2068.67	3766	0	11029.3	39580.7	7601	2841.67	15597.3	6366	4536.67	0	8425.33	0	629	8164.51	11775.7	0	2273.33	1390.67	6600.33	7674	5004.67	0	0	5888	0	1173	1277.67	1116.33	3492	1266.33	3099	0	32852	4526	0	4470.45	0	0	1688.33	510.667	611.333	0	90.6667
90	She_HFn_F12_06uM	32200	5729.67	4065.33	13292	9465.33	9859	3897.67	25123.7	55812	10354.3	5368.33	14461.3	16477	1136.67	6269.67	5688.67	0	7716.33	13366.5	17441.3	5008.67	16839.7	0	21690	24225	0	11259.7	0	7606.33	17695.3	38810.7	37484.7	488.667	7837	47390	42950.7	14116.3	42154.7	40743.3	0	19687.1	0	0	1636	339.333	0	2004.67	0
91	She_HFn_F12_10uM	50528.7	42428.7	35217.3	55851	31894	23566	36456.7	42002	40335.3	57346.7	44000.7	23908.3	51716.3	15270	22493.7	24901.3	5015.83	40933.3	38170.8	60020.3	11490.3	45320.3	0	26214.5	61052.3	28414.7	50437.3	15534.5	41515.7	24752.7	28541.3	59415.3	2840.67	12941.5	57953.8	30938.3	15144	48427	38792.3	0	32987.4	21457	1187.33	4414.33	5600.33	52.3333	29223.7	679.667
92	She_HFn_F13_02uM	20129	2734	753.667	9402.83	806.667	7967.67	308.667	2958.67	35843	16011.7	3587.67	20337.3	6141	21989.5	17405.7	10407.3	555.667	5443.83	8975.57	6092.33	2052	619.333	0	3583.67	6365	0	7096	0	21239.3	0	8075	7356	2228.33	5415.67	20841.7	17075.7	2296.17	28491.7	4098.67	562.667	7146.32	3357	1567.17	2100.33	1050.67	940.667	12167.7	342.667
93	She_HFn_F01_02uM	0	907.333	0	10642.3	807.667	0	0	4740.67	0	0	413.333	0	1697	0	0	0	0	0	1280.56	0	43.6667	3850	53.3333	0	3972.33	236.333	0	0	0	1019	0	0	0	5644.33	413	549	449.667	0	0	0	811.533	0	0	0	624.667	0	0	82.6667
94	She_HFn_F02_02uM	5408	2841.67	0	0	5214	0	0	0	5073.33	8648.67	5672.33	0	6345.67	0	0	0	0	2578.67	2785.49	0	0	0	1320.33	0	1710.67	6987.33	3026.67	0	0	94.3333	7811.33	1332.67	161	669	5124.33	0	2745.33	2138	8819.33	6440.33	2097.02	0	1951.67	0	0	0	0	61
95	She_HF_F01_02uM	53	824	0	37988.3	0	0	0	0	0	0	0	0	0	0	0	0	0	0	2591.02	0	75.3333	0	1419.33	0	0	579.333	0	0	0	100	10418	0	0	749.667	1095.67	0	0	0	0	0	721.867	0	0	0	117.333	216.667	0	0
96	She_HF_F01_06uM	0	637.667	157	0	0	0	0	0	0	0	531	0	199.667	0	0	0	0	0	101.689	15022.7	0	2350.67	2828	111.333	2733.67	194	0	0	0	0	0	2076.67	2080	0	6445	0	2211.67	0	0	1031.33	1802.68	0	104.333	355.333	107.333	0	155	75.3333
97	She_HF_F02_02uM	655	1134.33	375.667	10371.3	2557.67	850.333	202.667	0	0	0	1307.33	0	1239.67	0	0	0	0	5890.67	1638.98	2739.33	308.667	3560	0	0	5897.33	2576	11725	0	0	1084.67	9644	8138	752.667	650	15322.3	1350	6299.33	8047.67	6663.33	0	4237.92	0	1657	548.667	0	177	6819	0
98	She_HF_F03_02uM	0	410.667	0	0	0	0	0	0	0	1338.67	1132.67	0	0	0	0	0	0	10762.3	909.622	0	0	0	0	0	2337	537.667	4416.33	0	0	8.33333	0	2143	0	0	2451	0	4948.67	0	0	523.667	842.1	0	0	568	0	0	21251.7	0
99	She_A_F03_02uM	6307.67	9366.67	394	1330	6322.33	1512.5	730.667	0	25997.7	39601	7046	18310	1633.33	20341.7	20407	9518.33	1326.33	7186	8606.39	1485	0	0	0	0	2417	0	4844.67	0	3416.33	0	1087.67	1932.83	584.667	2266	6014.83	13353	6410.67	22792.3	1275	0	3394	1101.67	430.333	0	305.333	0	5870	129
100	She_A_F03_06uM	13323	19876.7	13031	33728.3	19044.7	17658	20890.7	0	46364.7	45733.7	19096.7	18647.7	19242.7	45184	19508.3	22588	3205.67	13105.3	21965.7	31584	6154	20151.7	0	0	9888.67	1515.67	7479.33	0	6024.33	2490.33	13212	44290.8	1250.67	5984.33	23583.3	39319.3	7134.17	15734.7	18373.3	0	12708.5	6333	334.667	3788.67	0	0	20056.7	6.66667
101	She_A_F03_10uM	34052.7	54588	1410.33	0	1926.33	0	30544	5384	47848.7	55596	50436	18464.7	1027.33	48315.7	20111.3	24380.7	0	10269.7	22759.9	0	6420.33	42779	0	0	27873.3	16878	0	0	16251.7	0	0	40021	0	3965.33	0	57715	14874	0	0	34.3333	11338.9	3113.67	343	0	0	0	17198	0
102	She_A_F04_02uM	8.66667	1234	0	5386.33	0	0	0	63	24833	1998.33	341.667	18775	0	0	0	0	0	0	2257.67	0	0	0	0	0	2133	1218.67	0	0	2114.33	0	0	789.333	254.333	0	0	0	1140.67	0	0	0	382.517	0	643	0	0	0	0	0
103	She_A_F04_06uM	1089.67	3714.33	0	0	1148.33	0	0	1421.67	40103.7	22858.3	2644.67	18817.7	0	4477.67	18562.7	0	0	773.333	5215.44	0	0	471.667	129.667	0	1733.67	7684.33	1003.33	0	35691.7	621.667	109	1143	5225.33	0	596.667	0	7659.33	0	0	0	3103.47	0	106.333	0	0	0	1895.33	64.3333
104	She_A_F04_10uM	10441.7	7451.67	1505.67	2936.33	3109	1134.5	11553.7	0	33396.7	34687.7	6142	18803	1071	9568.33	12124.7	11118.3	3540.83	9116.33	9043.69	7349.67	0	16808.3	0	243	5372.67	0	8734.33	0	47470.3	1265.67	10233	4399.67	4965.67	1302.5	17200.8	13578.7	5343	30930.3	14760	0	9497.88	5822.33	1504.33	775	1139	538.667	9793.67	457.667
105	She_A_F04_20uM	38797	6986.67	4115.67	1955.83	2027.33	8427.67	5473.33	5875	37440.3	39759.7	12704.2	18911.3	15203.3	34461.5	19662.3	15554	1585.33	6906.83	14781.3	6446.67	0	17244.3	0	0	7775.33	85	18900	4356.67	54319	5427.67	561.667	3446.33	2122.33	0	11540	31035	562.167	11324.7	0	0	8757.34	5614.67	1096.17	0	0	0	10780.3	0
106	She_A_F04_60uM	34309.3	35398.3	9615.33	42800	43159.7	11607.7	32773.3	23105	40090.7	47737	46365.7	18985	38128	28249.7	21446	21515.3	0	22100	30362.6	47423.7	10013.3	42684.3	1511	0	22201.3	25001	0	33701	55005.3	5328	50190.3	47742	1633	1406	22073.3	33780.7	5416.33	27344.3	15967.7	0	22421.1	0	240.667	1046	0	0	7585.67	16.3333
107	She_A_F05_02uM	250.333	1649	0	0	374.667	0	0	0	31762	7615.33	0	18025	0	0	4328.67	0	0	0	2776.76	0	0	319.333	0	0	1448.67	0	1024.17	0	0	0	13704.3	0	4615.67	50	0	0	0	0	0	0	1058.11	0	0	0	0	0	0	0
108	She_A_F05_06uM	5922.33	5316.33	0	0	68	0	651.667	0	17188	23618.7	1632.67	18729	0	14222	8270.67	0	0	1516	4675.71	40.3333	0	0	0	0	1651	912.333	1277	0	18783	140	0	89	4848.67	1059.33	4722.33	48.3333	0	288	0	0	1692.97	0	59.3333	96.3333	0	0	0	0
109	She_A_F05_10uM	27319.3	6012	0	4458.33	6260.67	879	9832.67	0	27925.3	28526.3	9622	18884.3	0	36507.7	14839.3	14569.3	0	3261.33	10707	0	1026.33	0	0	0	594.667	0	396	0	33844	0	0	471.667	0	3308	0	35665.3	260.667	32257.8	2932.67	0	5537.86	1047	0	0	0	0	1678	0
110	She_A_F05_20uM	34855.3	12245.3	5047	17090.3	15847.3	2933.67	11400	25802.3	29673.3	28359.7	17917.7	19370.3	0	24926.7	15000.3	18001.3	0	8930.67	15668.6	10262.7	995.333	11639	0	0	8686	0	0	1880	29464.3	0	2791.67	3133.67	6606.33	1132.67	6763	13063	0	31157.7	4735.67	0	6615.55	0	0	0	0	0	0	122.333
111	She_A_F05_60uM	38577.3	41038.7	39252.3	48595.3	18693.3	23544.3	38427.7	23375.7	44527.3	58604	57603	18392.3	31723.7	45435	20122.3	15295.3	0	20354.7	35316.8	45360.3	18821.7	58501.3	1359.67	0	17895.3	28049.7	0	4782.67	35412	22340.3	40139.7	46188	48812.7	12389	20572	55310	12726	44986.7	26687	473.333	27016.7	9009.33	102	17398	0	0	3827.33	91.6667
112	She_A_F06_02uM	41853.7	10615.7	3143	17543.7	30451.7	7687	25733.7	17716.7	39467	50120.7	16681	18992.3	11596.7	47861.7	12346.3	12049.3	0	7812.33	21885.6	31450.7	9997	38127.7	1046.67	0	9655	20913	0	27543.7	49155	26673	647.333	29852.7	6018.33	1670	9102.33	40470	0	33426.3	17404.3	169.667	17657.7	0	0	6077.67	0	0	0	0
113	She_A_F06_06uM	9757.67	36749	37210	54353.7	18778.7	5187.67	19164	28460	41524.3	46992.3	54548	19469	44694.3	38875.3	16741.3	17793	1353	27026.7	30978.3	30015	18269	32012.7	0	0	18692	21203.3	18582.7	33231.7	55601	25851.7	18340	9904.67	52650	5944.67	41895.7	48662	10017.7	40564.7	21827	0	25163.3	17279	0	5359.67	81	0	22748.7	736.667
114	She_A_F06_10uM	34756.3	37141.3	47147.3	36507.7	31996.3	31935	20503	29111	47948	55348	61888.3	20040	13558.7	47344.7	20121	11531	0	28389	34905	28307.7	9094	56413.7	0	0	12341.7	20656	27652.7	24041.3	54637	16922	36485	9297.33	7158.33	4298	28591.3	53847.3	15893.3	43186.3	41877.7	353.667	24535	5211	109	8887.67	0	0	35231	0
115	She_A_F06_20uM	41096	52441.7	59470	54860	33027.3	35813.7	32526	32802.7	45343	58919.7	62974.7	19517.3	30979.3	48413.3	20388.3	23941.3	1301.67	33920.3	41592.6	52118	21690.3	57582.3	388.333	280.333	25461.3	31389	0	21073.3	55369.7	28394.7	52181	41131	59141.7	2102.33	35956.7	59106	20483.3	42638.3	35610	521.333	32104.9	6306.33	808.333	9028.33	83.3333	0	847	0
116	She_A_F06_60uM	43431.7	50931.7	35263.7	34687.7	39111.3	40601	41724.3	42135.7	48278	57067.3	62929	18783	44711	47825	17294	24812.7	252.333	26558	41033.8	45610.7	30116.3	45607.3	0	279.667	30097.3	39186.7	27974.7	17837	55539.7	37310	47610.3	57190	33366	5243.33	24773.3	53970.3	18696.7	57246.7	47840.7	1023	33774.8	28213	175.333	12987.3	79.3333	0	9990.67	174.333
117	She_A_F07_02uM	11173	15348	26481	18286.7	9634	4910.5	28659	26683.3	42593.3	29652.7	20078	19344.7	16389.7	27110.7	19119.7	2456.33	1133.33	22937.3	20071.4	39583.3	8797	36934.7	0	0	15134	524	15578.7	31766	53521	31378	6767.33	4049.67	0	2025.5	37380.3	31682.7	0	40185.3	25809	0	19055.8	0	0	3922.67	1275	1309.33	5680	1081
118	She_A_F07_06uM	35286	19329	31450.5	39887.3	18311.3	27814.3	33325	32267	36262.3	39646.7	28468.2	19036	31953.7	37894	12644	19332	2151.33	36165.3	30014.1	36195.7	16572.3	36233	0	755.667	10446.7	18382	21206.3	33607.3	56196.3	18715.7	32198.3	33113.8	2887	2789.67	20667.3	47203	2972.67	41832.3	22001.7	0	22698.8	0	0	5425	0	0	7286	571.333
119	She_A_F07_10uM	36717.7	49067.3	14726.3	30839.3	38310	24752.7	39295.7	34217.3	41089	53155	62651.3	19210.3	30943.7	42325.3	21765.7	17461	0	61150.3	37282.7	42110.3	15832.3	41713.3	2740.33	2.66667	25836.3	20393.7	6826.67	38833.3	56523.7	32946	41778	49934.3	862.333	2250.33	35612.7	49075.7	11546	41649	45122.7	0	28079.5	366.333	0	4112.67	0	716.667	0	0
120	She_A_F07_20uM	46238.7	44185.7	24882	44341	34047.3	31244	35263	38709.3	50596.7	58462	61652.7	18029	50483	45104.7	22345.7	16101.7	0	34444.7	39977	32193	23075.7	33578.3	0	518.333	29756	47285.3	29177.3	36555	52864.7	41088	39360.3	43659.3	0	3825.33	44154	39179.3	11829.7	57305	30443.7	706.667	29792.4	24833.3	483	13113	0	0	443.333	265.667
121	She_A_F01_02uM	13344	2310	0	0	414.333	0	0	4059	11001.7	12160	4469	18950.7	1252.67	0	20231.3	2510.67	0	4774.67	3585.69	0	0	0	0	0	1109.67	0	5073	0	0	0	4580.67	2047.67	1277	371	6347.67	0	2277	1906.33	0	0	1249.5	0	849	0	0	0	8969.33	0
122	She_A_F02_02uM	30847	12324	3428.33	16948	13183.7	7706	21907.3	1344	37083.7	40533	1843	18424.7	7542	32997.3	10025	15420	0	0	15179.2	347.333	231.333	986	3219	222	3750.33	289.667	0	0	3570.67	0	0	2416	230.667	1529.33	5135	14786.3	0	11340	11042.7	1692.33	2954.82	74	0	3259.67	396	344.667	0	0
123	She_A_F02_06uM	34382.3	44038.7	32666.7	25331.7	25099	48706.5	38448	39292.7	46033.3	32535	54252.3	18269.3	22970.7	37101.3	11608.7	24554.3	7638.67	16627	33674.9	37956.7	30804.7	51165.7	1439.67	1272.33	11235.7	31396.3	12856.3	0	6841.33	24698.3	32455.7	3524.67	2635	2556	31056.3	46647	1466.33	35108.3	10722.3	1297.67	18791.9	16626.7	0	28975	323	0	33188	360.667
124	She_A_F02_10uM	21506.7	46928.7	41548.7	44214.3	34556	26732	34639	37001.7	51687.7	53216.7	62157.7	18579	40627	39703.3	22363	23377	7507	25867.7	37859.6	56383.7	31166.7	45432.3	0	0	25362.3	43914.7	24018.3	167.333	12847.3	37451	43619.7	22243	0	5851.33	39199.3	56227.7	6817	28623	34761.7	0	25704.3	22828.7	274.667	28984	390.333	684	31985.7	696.333
125	She_N_F07_02uM	17323	10455.3	4740.67	20296.7	5092.67	3796.67	9269.67	0	38386	52926	12228	17332.7	10458	47246.7	19405.7	0	0	22638	16990.5	9619.33	0	3967	0	48856.7	42335.7	9658.67	18693	14162.7	54413.3	498.667	27585.3	16648	3409.33	1551.67	41684.3	5712	26997.3	50786	2012	0	18929.5	800.667	503	1526	0	0	18847	0
126	She_N_F07_06uM	49570	62073.7	35003.7	0	0	23.3333	23980.7	25855	52573.7	56041	63073.7	18866.7	3522.67	48010.3	19963	17647.7	0	61344.7	32071.5	0	28190.7	10382.3	3209.33	32262.3	7739.33	38959	16739	39469	56245.7	45900	0	16442.3	2574.67	7805.67	0	0	38334.7	0	0	1835.67	17212.7	2327.67	4372	21948	392.333	0	25357.7	0
127	She_N_F07_10uM	56625.7	62645.7	46468.7	35144	37735.7	31664.3	43836.7	44655	57439	56273.3	62894.3	17916.3	34482	47420.7	18901.3	4338	0	61044.7	45222	41418.3	30065.7	42641.7	3836.33	34573.3	60397.3	51565.7	61420.3	33156	55392.3	52134.3	37280.3	61283	2940.33	6117.33	40421	46392	38194.7	47628.3	30239	920	38854.9	22042.7	5203.67	25665	81.6667	0	22577.7	285.667
128	She_N_F07_20uM	42158	62549.7	29859.7	61131.7	52962	49573.7	40078.3	31978	44966.7	57977.7	62873	19307.3	25393.3	47668.7	20540.7	18779.7	1309	58119	44573.2	58793.7	33176.3	55764.3	14975.7	54681.3	61297.3	44554.7	61914.7	39382.3	56284	39255.3	28282.7	38301	8967.67	16559.3	57098.3	49867	30091.7	29685.7	23611	0	40127.2	20424.3	5387	15843.7	881.333	0	33785.3	258
129	She_N_F08_02uM	45008	24214.3	47519	20650	8099	18462	21740.3	28122	47895.7	55794.3	18633	18275.3	32532	47629.7	20158	0	0	26980.3	29552	30039.3	18881	18312.7	2766.67	30046	46967	16736.3	17595.3	24197.3	55257.3	22655.7	18501.7	30808	0	5169.67	5537.67	22071.3	3994.67	30416	34023.7	0	21698.9	2444.33	319.333	1972.67	611.333	0	0	7
130	She_N_F08_06uM	11869	62128.3	53841.3	47156	30713	12108	28114.3	26772.3	41830.3	58508.3	61839.3	18918.3	40681.3	47583.3	15697.3	13636.7	0	61147	38952.8	57336.3	17239	43871	6132	39628	60867.7	38709.3	61781	35631	56029.3	37241	18138.3	47459.3	3718	6239.33	55992.3	44938.3	24250.7	30355.3	29430	0	35749.4	8925.33	3062.33	6354	1255	0	8017.33	577.333
131	She_N_F08_10uM	52768	62432.7	51142.7	48507.7	48845	47358	33629.3	39706.7	54120	52998	62684.3	17651	50337.7	47160.7	19398.7	23823.3	1095	59764.3	47503.3	41242.3	25480	34002	12526.3	49793	58270	35622.7	60508.3	37323.7	54717.7	36462.3	37791	57558.3	0	8243	49281.7	52568	31694	42404.3	45162.7	1338.67	38532.6	7806	4431.67	22601	57.6667	0	27870	0
132	She_N_F09_02uM	0	349.667	0	0	0	1028.67	8.33333	0	1758.33	1240.33	106.333	0	507.333	0	0	0	0	0	333.267	12686.7	0	0	0	1160.33	1776.67	223.333	0	970.667	12148.7	184.667	0	1314.33	12045	972.667	1127	0	0	9044	0	0	2682.7	0	0	17	63	0	0	158.333
133	She_N_F09_06uM	1397.67	2154.33	616	1883.67	0	0	0	0	32979.3	33862	3646.67	18619.7	8452.67	47401.3	9589	0	0	14797	9812.71	0	0	1280	0	3485	7447.33	448.667	9183	0	56517.3	0	0	2086	0	66.3333	5770.33	776.333	2014.67	22325	2582.67	0	5699.13	0	225	0	0	0	0	0
134	She_N_F09_10uM	39224.3	34315	7126	37187.7	9642	9384.33	26072	11476	43204.7	52150.7	18910	19408	48376	48246.7	8094.67	0	0	60472.3	29719.2	36472	3469.67	2182.67	296	15127.3	40910.3	36151.3	0	20778.7	51807	31807	4717.67	11247.7	40428	731.667	6041.67	17442	2462.33	34464.7	41052.7	0	19879.5	794.667	18.3333	7661	305	0	0	98.6667
135	She_N_F09_20uM	50368	31646	60292.7	36777.3	34359.7	42050.7	18499	33720.7	59038	56311	42740.3	19070.3	49647.7	47782	20199.3	2966.33	0	51360.7	40972.9	38746.3	10961.3	59787.7	738.333	32926.3	60622	13790.3	62016	32559.3	55515.3	31734	29617.7	60579.3	35224.7	3340.67	55172	52373.3	14445.3	46647.3	17731	0	35726.4	9856	1441.67	5075.67	21.6667	0	3016.33	104
136	She_N_F10_02uM	2493.67	2806	0	965.667	852.333	0	690.333	651.333	2628.33	14978.7	1532	23848.7	0	2472.33	0	6235.33	0	0	2004.71	2516.33	29.6667	2390.33	0	0	4255.33	2040.67	3428.33	4145	7002.67	6515.67	5643	2299	2725	992.667	1175.33	27.3333	3073.67	2142	1799.33	0	2610.07	0	1008.33	1919.33	106.333	461	1033.67	231.667
137	She_N_F10_06uM	15014	4477.33	0	3577.33	0	0	62.6667	6552.33	46458	32756	3652.67	17890.3	0	27244	19596.7	11718	0	2391.33	9479.04	0	0	0	0	0	6686.67	0	2110	0	54986.3	0	0	2809.67	0	0	0	1596	1070.33	1968	0	0	3561.35	900	0	0	0	0	0	0
138	She_N_F10_10uM	29660	17568	1061	18412.7	10613.3	6370.67	18616.7	11247.3	28453.3	52459.7	13955.7	19062.3	12345.7	47419.7	20487.7	14200	0	16268.3	18963.5	21531.3	3574	19936	0	26.6667	8678	1050	0	18864.3	55555.7	6492	484.667	5607	0	3213	8618.67	39172.3	0	25792.3	13186	0	11589.1	2562	0	0	0	0	17.6667	0
139	She_N_F10_20uM	45356.3	24233.3	9045.67	21956.7	15973.7	12332.3	20206	15895.3	49291	56054.3	25998.7	18603.7	12129.3	47543.7	19931.7	6991.33	0	12358.7	24558.3	20246.7	17434	35765.3	1566.33	0	25580.3	1466	21445	10818	55172.3	1616.67	13904.7	26702	8533.33	2152	23038.3	46417	224	29459.3	18821	707	18018.1	10781.3	0	0	0	0	30496	159.667
140	She_N_F10_60uM	25548.7	39008.7	17745.3	32541.7	10988.7	23247.5	31049.3	32464.7	48601.7	55828	52667.3	18369	18107.3	37190.7	19948.7	20027.3	8816.83	14288.7	29873	37205.3	13748	47540.7	0	0	26676.7	25772	19819	39455	54442.3	21416.3	40814	16091.7	1312.67	4335	44955.3	37598	9196	46410	20754.7	0	25377.1	11763.3	0	4013.33	0	0	28080	655.5
141	She_N_F11_02uM	103	706	315	0	0	0	19	0	10699	2600.67	207.667	0	4520.67	3420.5	0	4377	0	913.833	1567.02	0	0	0	0	353	0	0	0	0	3993	0	0	919.667	0	0	0	0	317.167	718.333	0	0	315.058	0	0	0	0	841	0	0
142	She_N_F11_06uM	10268	2243	0	7111	89	1257.67	0	1686.67	47997.7	24252	1042.33	18031	10497	36929.7	0	1367	0	11868.7	10349.5	0	0	0	0	3932	24925	872.667	0	14371.7	51643	8246.33	13546.3	9430	0	813.667	3436.33	21275	0	32127.3	1868	0	9324.37	0	0	0	0	0	0	0
143	She_N_F11_10uM	33101.7	12072	0	16105.3	9365.67	33920	25874.7	27268.3	41870.3	46098	7365	20157	12866	42553.3	13373.3	0	0	8913.33	21158.2	30700	5550.33	12610	2013.67	22339.3	30611.3	27092.3	9789.67	29411	49708	32288	8038.67	32935	886.333	2667	19700.7	34283.7	885	36282	12513.3	689.667	20015.3	6392.33	0	6106.67	0	0	0	0
144	She_N_F11_20uM	20186.7	51892.7	13684	34464.3	32779.7	30305.7	30052.3	32074	41614	54727	34709	19105.3	60404.5	47759	17459.3	0	0	55388.3	36002.7	44869.7	20004	15077	1372.33	25085.7	50558.7	36940.3	61619.3	34183.7	54168.3	37473.7	10722	17330	1616	3353	43878.3	28075	11264	33875.3	14463	0	27296.5	16251	1122.33	10088	809	0	5524.33	68.3333
145	She_N_F11_60uM	34458.3	53297	23291.3	47803.7	35372.7	60755.3	38710	36390.3	43109.3	51730.7	62840	21662	43249.7	47619	21044.3	14160	0	60652.7	42618.7	48377.7	28451.7	42126	2713	50101.3	60568.3	30995	60091.3	38710.7	55220	34860.7	33454.7	5910	5268	13152	55452.3	44561.3	22523.7	41958	24909	1955.67	34970.2	521.333	2710.33	16682.3	3435.33	361.333	8582	1251.33
146	She_N_F12_02uM	9114.33	9617	180.667	26696	507.333	909.333	2702	1759	35916.3	26369.3	7495.33	19521.3	0	553	15933.3	8613.67	0	4785.33	8440.33	2448.33	2242.33	16870.7	1492.67	0	3265	788.667	0	0	20213.7	0	0	381	8566.67	742	1182.33	8424.33	0	29842.3	0	0	4823	0	0	0	0	0	0	74.6667
147	She_N_F13_02uM	11805.3	17260	9357	41580.3	16833	2596.33	33963	58430.7	36162	50269	12920.3	18684	18049.7	45113.3	9521	0	7977	43739	27070.4	13194.3	8783.67	35925	0	28515	24528	30585.7	41304.3	34657.7	48705	23855.3	466.667	5494.67	0	2203	22971.3	37129.7	1778.33	26058	8998.33	0	19757.7	0	0	0	592.667	0	652	645.333
148	She_N_F13_06uM	45884	53616	32272.3	33053	37222	45168.7	19502	28619.7	52813	54181.7	49755.7	18145.3	29136	47142.7	17925.3	8377.33	0	60566.3	39262.2	54671	13441	21433	5121.67	33883.3	57137	51948	60812.3	38689	55076	44916	20960	43726	3725.67	4000.67	45060.3	46928.7	17403	21425.7	43822.3	0	34209	1525.67	1169.33	515	0	0	5771	183.333
149	She_N_F13_10uM	46930	62608.3	27442.7	53716	45377	60984	38401	47390.3	41315.3	58259.7	63022.3	19549.3	36906.3	47767.7	20644.3	5509.33	0	60670.3	46052.7	53871.3	18465.7	50479.3	3719.33	47890	60421.3	54042.3	5628.67	38588.3	55637.7	55519	32498.7	62371.7	7317.67	4643	56563	57556.7	22057.7	48483.3	42226.7	0	38899.1	14500.7	2156.33	12213.7	307	0	4691.33	128
150	She_N_F14_02uM	18925	7529	552	6300.67	6091	1129	0	990.333	38594	37192.7	3430.67	18787	2461.33	0	20242.3	0	0	0	8213.04	2257.67	0	22841.7	1810	0	4159	0	3985.33	0	17084.3	0	0	1132	0	740.667	2055.67	1232	1590.33	24385.7	9396.33	0	4633.53	380.667	0	364.333	0	0	0	71.6667
151	She_N_F15_02uM	19860	53645.3	35481.3	37001	23254	44928.3	39578	36208.3	48422	55757	25462	18985	60255.5	48414	22527	0	0	61012.7	39285.3	53770.7	15525.7	48446.3	23881	20508.3	59935	41850.7	60986	39576.7	55464.7	47122	18114.7	12051	0	5425	49234.3	34690.7	8258.67	46149.3	42303	0	34164.7	6943.67	745.333	12630	1228	719.667	211.333	0
152	She_N_F15_06uM	47998	59961.3	38049.3	53896.7	26895.7	60024	33546	34920.3	57668.7	55146.7	63060	19341.7	51666	47484.7	20491.7	17694.7	4309.33	56299.3	46061.7	53897.7	24453.7	55416	48607.3	39284.3	60311.3	31531.7	60196	36562	56530.7	29819.3	21459.3	4026	513.333	11494.3	53917.3	43348.7	15988.3	45025.7	51015	750.667	37169.9	3482.67	2007.67	15000.7	777.333	0	936	166
153	She_N_F01_02uM	0	853.333	146.333	0	0	0	0	0	0	0	0	0	0	0	0	0	0	83.8333	72.2333	0	0	0	0	0	3156	0	0	0	0	0	0	0	0	0	0	0	5861.67	0	0	0	450.883	0	0	0	0	391.667	208	0
154	She_N_F01_06uM	867.667	64.6667	0	0	0	0	1323	0	0	0	0	15313	6526	0	0	0	0	786.333	637.844	0	0	0	0	0	0	3249	0	0	0	0	0	1061.33	6701.67	0	0	0	0	0	0	0	550.6	0	0	1797.33	0	0	176	0
155	She_N_F01_10uM	1120.33	10006	0	6980.33	1285.33	4233.67	0	0	30465.3	15715.7	7725.33	17614.3	25544.3	0	19296.3	0	0	13435.3	7767.44	12333	0	7986	2203.33	0	24915	24775	5728.33	0	0	0	1302.33	9878.33	1864	921	7287.67	405.667	1425.67	21353.3	23274.7	287	7282.67	0	0	91.3333	1037	0	0	0
156	She_N_F02_02uM	5438	3793.33	1876.33	0	0	283.667	0	1564	33695.3	40865	4589.67	0	2441.33	0	19462.7	0	0	15673.3	7348	0	0	5382.33	0	0	3693	0	3697.67	248.333	2112	79.3333	15835.7	1494	4355.33	0	1142.33	1496.33	5386.67	0	0	0	2246.15	0	1820.33	0	0	0	1739.33	0
157	She_N_F03_02uM	1654.67	17252.3	0	2275.33	0	0	0	0	3460.67	3453.67	2784.67	10800.3	0	0	2178.67	0	0	46052	5128.89	0	0	0	0	0	0	1031	0	0	11791	0	0	0	2552.33	0	0	0	0	24	0	0	769.917	0	942.333	0	0	0	2309	0
158	She_N_F04_02uM	27468	4662.33	13843.3	0	346	14915.7	0	6471.33	52525.3	45775	3859	18520.7	0	13077.3	19768.3	0	0	9471.33	12827.6	3534.67	0	18724	0	20098.7	8959.33	1305	0	0	16001.3	0	0	1728.67	1201.33	842.333	4856.33	9674.33	140.333	11700	13353	0	5605.97	0	0	497.333	802.667	0	0	0
159	She_N_F04_06uM	39935.7	51328.7	25976	20953.7	24962.7	35168.3	11482	25972.7	54351	56879	43526	18794	23900	46711.7	20924	3550.67	649	58778.3	34705	34351.3	14916	34675.7	1098	29842.3	57482.3	42793	61720	22757	40184.7	21468.3	7317.67	12695	4140.67	1967.67	53200	32020.3	16080	33230.3	25829.7	0	27388.5	19074.7	2058	0	12677.7	0	4732	240.667
160	She_N_F04_10uM	33479.7	52239.3	14642.3	27353.3	33873	41506.3	22536.7	32804	30387.7	51575.3	62320.3	18285.7	52793.3	47040	19143	4714	1615.33	60136.3	37620.2	35686	27635.7	21026	7677.67	48232	60055.7	31188.3	60983.3	30582.7	49717.3	30675.7	25181.7	46291	7799.67	6284	53593.7	26669	22317.3	35351	23549	676.667	32524.8	20551.3	3105.67	23463.7	1303	0	24320.7	47.3333
161	She_N_F05_02uM	2938.33	22429.7	0	0	131	0	0	9323.33	8029.33	9990	22290.7	16083	0	0	0	0	0	42967.3	7873.31	0	677	2296	0	0	0	1251.33	4081	0	31839.7	0	97.6667	0	2140.67	0	0	0	1118	2327	0	0	2291.42	0	178	0	0	0	0	0
162	She_N_F05_06uM	48478.3	62763	38997.3	37872.3	18649	41449.3	32881.3	30403.7	40312.3	56560.3	55488.7	18323	27849	47542.7	8890.67	0	0	60465.7	39980.9	29064.3	32639	45590	8922.33	20807.7	58691.3	31600	61127	28616.7	55117.7	35420.3	22248.3	52854.7	2478	3717.67	36922.7	30103.3	28386.7	52457.7	35726	4675.67	33624.6	26035.3	1386.33	7553.33	156.667	0	2289.33	32.6667
163	She_N_F06_02uM	5861	7128.33	0	941.667	0	1814.33	0	0	44505.7	55949.7	7429.33	16246.7	0	2726.67	20591.3	0	0	27304.7	10244.1	1773.33	0	0	1854	2276.67	6348.33	12234.3	381	26328	17058.3	0	0	9590	892.667	2654.33	9133	2762	1364	0	183.667	0	4741.68	0	137	530	790	0	0	320.667
164	She_UN_F01_02uM	5094.67	5648.67	0	7055	0	0	19.6667	0	37200	15699	5854	18695.3	0	0	18558.7	0	0	1980	5236.73	0	2000.67	0	0	0	55.3333	0	609.667	0	0	4283	0	1602.33	13705.3	710	0	0	0	13017.3	0	0	1799.18	1070.67	0	2639	0	0	1939.67	0
165	She_UN_F02_02uM	23592.3	10022.3	8697.67	0	0	0	7438.67	0	26537.7	26816.3	4651.67	19194.7	0	16103.3	6740.67	10552	0	3556.67	8494.44	0	71.3333	5200.33	0	0	0	1117.33	0	0	1658.67	0	0	0	2880	343.333	0	0	0	0	0	0	563.55	575.333	0	183.667	0	0	84.6667	26
166	She_A_F08_06uM	40001.3	30704.3	25280.3	32744	11822.3	5892.67	33118.3	28398	48159	55612.3	39291.7	18115	20379.3	44193.7	18193.3	15790.3	0	19111	28980.6	32469.3	7320.67	38687.3	0	0	10645.3	26764.7	4169.67	0	33658.3	6286.67	13458.7	18443.7	0	6575.33	17104.3	23766.3	2815.67	35566.7	33221	299.667	15547.7	5437	0	6949	0	0	3749.67	76.3333
167	She_A_F08_10uM	30803.7	29785.7	29628	28098	30280.7	7039.33	23610	18482	39356.7	57379.7	49396	19075.3	19566	38429	20908.7	23048	2323.33	20553.7	28315.4	42901.7	9477.33	42204.3	0	0	8738.67	28045.7	8018	0	18601.7	3216	18121	6745.33	53800.7	4762.67	16999.3	25101.3	9052	40011	14715.7	0	17525.6	12100	0	4223.67	0	0	28887.3	0
168	She_A_F08_20uM	36339	30911.3	40515.3	33199.3	41637.3	23946	23728.7	22917.7	36538.3	52338.7	59521.3	18316.3	32103	46287.7	17381	18168.7	66	27320.7	33824.7	29224	7178.33	35573.3	0	0	11187.7	28137.7	22401.3	0	19668	0	33650.7	5621.33	58320.3	2602.67	22991.7	47553.7	16078	43480	15374	0	19952.1	7988	0	3938.33	0	0	43961.7	0
169	She_A_F08_60uM	38974.3	59369	22917.3	48845.7	33868.3	52543.7	34303.3	26884	30762	57577.3	62922.3	19049	38211	46837.7	19264.7	20786.3	0	35505	39301.4	48376	20616.3	48971.3	0	0	29918.3	27126	0	0	11084	25463.3	51430	33228	0	3172.33	44953	41740.3	29405.7	32446.7	38184	29	24305.8	4043	934	1481.33	0	0	8390.67	109.333
170	Shw_F01_2uM	0	0	0	0	154	0	0	1939.33	0	0	0	4233.33	0	0	0	3833	9242	0	755.689	0	0	0	0	64.3333	423	168.333	0	0	2217.67	0	0	519.667	822.667	0	0	0	0	0	0	0	210.783	0	0	0	0	0	0	0
171	Shw_F02_2uM	0	0	672	0	0	0	0	3070.67	0	0	0	0	0	0	0	13251	5499.67	0	616.156	0	0	0	128.667	0	406.333	677	0	0	385.333	497.333	0	0	4324.67	0	482	0	0	22.3333	0	0	346.183	0	0	0	117.333	0	0	0
172	Shw_F03_2uM	40820.7	45054	36890.7	32076.3	2858.33	35295	35889.7	18579.7	47057.3	56416	40413.3	15402	30797.3	2707	18953.3	25592.3	32747.7	59907.7	34500.7	23729.7	18755.7	11157.3	48285.7	42043.7	27875	42079.3	50879.3	29822.3	52194	44747.3	957	24561.7	626	22750.3	13717	45014.7	16042	18422	30391.3	5403.67	28202.6	3431.67	12110.7	13499.3	9259.33	193.333	0	332
173	Smc_F01_02uM	19	0	4	13.3333	0	630	263.667	853	78	0	0	0	0	0	0	10468.7	5303	0	477.6	451.667	0	0	3949.67	1551.33	2425.67	0	10297.7	9544	17197.7	0	1169.67	0	7091.67	556.333	8857.33	0	0	0	0	0	3154.63	0	0	0	0	89.6667	0	369.333
174	Smc_F02_02uM	29328.7	46930	27166.7	34917	3483	41056	28347.7	16582	56307	53950.7	40200.3	19345.7	28894	9957.67	21170.7	29824.8	45084.3	59582.3	34785.8	34539.7	28167.3	17360.7	51495.5	61242	31906.7	25790	58345.3	39337	55573.3	46697.7	8388.33	7408.33	53454.7	48305	10134	19750	3588.67	39821.7	49489	3324.17	34539.7	3925.67	7798.67	3327.33	2793.33	1950.33	1874.67	238.667
175	Smc_F03_02uM	46766.7	33773.3	32278.3	40848.3	4628	59641.3	40564.7	30426.3	49111	43766.7	38024.7	19908.3	61199.5	42115	21102.3	25391.3	43115.3	26958.8	39547.9	50921.3	19786.7	32448.7	54528.7	54581	56862.7	41346.7	55555.7	34688.7	54712	49564	14518.7	6748	6475.67	57976.3	36075.3	40368	6841.17	27125	28192.7	7405.33	36465.8	17060	14351.2	1123.33	4246.33	2137.33	986.333	541
176	Smc_F04_02uM	52651.3	58471.7	51963	35300.3	2074.33	40739.3	14575.7	4745.33	45537.7	52639.3	45789.3	18083.3	47315	4711.33	17817	26209.7	41310.7	60571	37226.4	46018	6629	28341.3	52589	24875.7	31040	42115.7	21966.7	37692.3	55215.3	45158.3	541.333	40471.3	6664.33	9006.33	23662.3	38953.3	3938	29396.7	52683	2383	29847.9	12078.3	4682	235	3070.33	1477	0	376.667
177	Smc_F05_02uM	50163.3	43172.7	41453.3	41971.3	1053.67	54068	34376.7	33848.7	49415	55480.7	20957.7	17441.7	58364.7	39567.7	20925.7	27284	36940	58593	41295.1	34571	27577.3	11454.7	52908.3	50628	38916.3	44361.3	40145.7	37816.3	55589	41676	4043.33	20600.3	240.333	41511	25696.3	42095	9066.67	18938.7	35888	5770	31686.2	4575.33	2996.33	1116	5525.67	688.333	0	212.333
178	Smc_F06_02uM	40984.7	55175.3	54732	56166	2898.33	55657	35603.7	39689	48294.3	48304.3	43474.3	19066	60208.3	28463.3	21395.7	27222.3	39399.3	59885	44595.7	56148.3	20125.3	50292	54693.7	56421	60759.7	46952.7	50265.7	39410.3	55648	45776.3	8702	7330.33	5067.67	61077.7	43197.3	55887.7	3521	47032	54473.3	13995.7	41139.1	18356.3	6810.33	783.333	10191.7	2291.33	1587.67	811
179	Smc_F07_02uM	47124	59286.7	52559.3	57965.3	5888	57802.3	39410	35579	54008.7	45698.3	33432.3	20427.3	61101.3	29776.3	21379	28898	44399.7	60588.3	45641.3	57892.3	15669.3	50902.7	54981.7	58155.7	56476.3	43673.3	33781.3	38795.3	56411.3	52003.7	13303	27855.7	0	57862.3	46522.3	44370.3	3705	45298.3	46766	12343.7	40221.3	11174.7	3690.67	2118.67	5952.67	2180.67	0	651.667
180	Smc_F07_06uM	45484	25733.7	33045.3	52967.3	3500.67	55468.7	51282	49148.3	43433	34303.7	46120.7	19458	60460.3	38920.7	20442	25199	44269.7	42085.7	41748.2	48656.7	18587.7	34373.7	53938	59610.3	54726.7	50859.7	35746.3	34276	55243.7	54785	3942.33	43842	0	60256.7	40904.3	46269.3	664	49967.3	37332.7	13083.3	39199.1	21904.7	5310.33	238.333	4642.33	1333.67	0	546.667
181	Smc_F08_02uM	50965.3	54177	54377.7	59716.7	4322.67	59128.3	36391.3	47877.7	40619.7	46707.7	45566	19501	61008.7	28351	21447.3	27230.7	43735	60226.3	46211.4	54923	24855	48883	54652.3	58248.7	59368.7	45924.7	50698.7	39584	56212.7	55266	172.333	9605.67	0	58148.7	47553	55490.7	3472.33	60427.7	60272.3	18448.7	42188	22672.3	7980.33	1272.33	9239.67	2050.33	0	714
182	Smc_F08_06uM	55380.3	52585	58578.7	59404.7	5646.33	60849.7	50586.7	47203	47624.3	54805.3	30329.7	19147.3	52696.7	39724.7	20193.3	26702.7	44691.3	60499.7	48040.4	55130	29275.7	29009.3	54527.3	61133.3	57874	52130.7	38768	36481.3	55425.3	46663	5808.67	33676.3	8391	59468.7	49327	57095.3	4891	50133	28808.3	11930.7	40700.9	14724.7	5023.33	3069.67	6976.33	1935.33	0	468.333
183	Smc_F09_02uM	49344	49067	44963.7	55824	4556.33	60708.7	52351.7	47504	48512.3	47640.3	47871	18979	57116.7	38880.7	20412.3	25468	42920	61469.7	47248.7	52795.7	17640.7	24320.7	54021	60158.3	58736	42407.3	40870.3	34835	55620.7	46999	4168.67	26740	5458.33	60172	43689.7	41024.7	2284	52754.3	44379	16251.3	38453.8	13692.7	6608.67	372	5457	1503	0	431.333
184	Smc_F10_02uM	57262.7	58023	57881.3	60727	4247.67	56854	43255	43055.7	59294.7	55938.3	37912.7	19682.7	61119	42112.7	20972.7	29420	44891.7	60643.7	49547.9	55081.3	10518	55617.3	54906.7	60718.7	52619.3	47409.3	37953.7	38711	55687.3	54590	5138.67	22712.7	6704.67	62150.7	48940.7	48979.3	4387.33	52780.3	55882	17090	41574.4	8646	3902.33	3043.67	7313.67	2056.67	0	489.667
185	Sme_HFa_F01_02uM	49437	36952.7	46542.7	33541.7	45240	58126.7	21946.3	28738.3	51247.7	30087.3	34935	19105.7	30552.3	41962	18520	29372.3	9554	35566.7	36962	53759	31089.3	56395.7	0	1106.67	22043.7	47798.3	17561.7	4047	27738.3	42419.7	49960	55622.7	59.6667	22726.3	25378.7	62237	3469.67	61484.3	47283.3	11591.7	31609.1	19502	477	13079	512	807.333	6025	582
186	Sme_HFa_F01_06uM	63128	55683.7	47285	53606.3	61616	61219.3	60782.3	56829	61773	39740.7	49517.7	23945.3	60618.3	47172.3	22777	28112	8620.33	54070.3	52110.8	58640	48880.7	62109	0	2749.33	53831.7	60178	28035.7	0	39930.3	60867.3	55479.7	58923	1062.33	22000.7	52399.3	60335.3	12201.7	58797.3	58784.3	33192.7	39760.3	39522.7	2991.67	25689.3	999.333	1177.67	56399.7	0
187	Sme_HFa_F01_10uM	62242.3	59579	63520.3	51487.3	56947.7	56376	56170	55327	61710.3	46367.3	52278.7	24001	54278.3	46827	22667.7	30091.3	9995.67	61442	52969.9	55908	46115	62006	0	2057.67	34202.7	59651	31802.7	0	30185.7	58186.7	61066	58729.3	3654.67	25356	57188.7	57512.7	7614.33	60652.3	60253.7	35208.3	38607.2	37382.3	3404	16687	0	564.333	58587	0
188	Sme_HFn_F01_02uM	152.667	0	0	0	0	0	894.667	4755.67	311.667	0	0	14353.3	0	7876.33	1564.67	18075.7	5109.33	0	1273.36	0	0	0	2137.67	0	0	563	0	0	4108.67	0	0	0	0	0	2004.33	0	0	0	0	2357	440.683	0	0	0	463.667	1139	0	0
189	Sme_HFn_F01_20uM	193.667	0	663	0	340.667	0	490.667	1959.67	321	0	0	0	0	4529	0	6074.67	0	0	566.511	0	5473	0	1487	256.667	0	1156.33	530.333	0	1048.33	826.333	4342.33	0	3944.33	479.333	662.667	0	0	0	1795.67	1089.33	1100.12	95	83.6667	3049	37.6667	0	0	222.667
190	Sme_HFn_F02_02uM	46144.3	51676	42877.7	59603	44289.7	60021.7	46929.3	14052	30054.3	59325	51099.3	18828	60708.3	1811	11730.7	15324.7	4525	58895	42134.1	50372	42249.7	62928	5418.33	41958.3	60231.7	41493	56482.7	3813.33	49480.3	45082.7	50346.7	61181	4860.67	15505.7	52777	57124	11485	54247	51927.7	13050	40948.2	21666	11062	17918.3	43360.3	1382.67	35693.3	674.667
191	Sme_HFn_F02_06uM	63214	61218.3	60819	57612.7	35326.3	60102.3	62057	58292.7	62045	50885.3	54714.3	22228.7	60039.3	10604	22237.7	19637	5353.33	55343	50508.4	53553.3	64199.3	55429.3	0	61369	60649.7	63658.7	61222	39123	56610	62501	44719.7	53934	52680.3	30346.7	55853.7	60609.3	44967.7	56832.7	53511.3	24860.7	51588.5	27818.3	12105	54088.7	46508	5195.67	55200.3	998.333
192	Sme_HFn_F02_10uM	61284.3	61326	60501	56330.7	57981.3	60700	61371	57776	61910.3	58619.7	62848.7	22826.3	60946	11417	22313.7	22552	1705.33	60450	53011.2	49071.3	63276.7	58815	2353.67	61215	61063.7	63718.3	61162.7	38788	56877.7	62408	59803.7	57747.7	0	24663.3	52445	62087.7	37677.7	57733	52898.7	23938.7	49190.3	40844	7902.33	52327.7	51828.7	6241.33	52256	1409.67
193	Sme_HFn_F03_02uM	40212.3	25935	61636	43234.7	9391.67	29667.7	40011.7	32084.3	50785	7740.67	10395.3	10310.7	30424.3	168.667	21134.3	7424.67	0	51401.7	28872.6	42525.3	21376	46699	1450	57793	14623	40878.7	29323	11363.7	50277.7	39865.3	13603.3	41644.7	57906.7	25939	57470.7	15193.7	0	48449.3	24611	24596.7	32049.7	3609.33	499.333	29585	28486.3	410.667	73.3333	2730.33
194	Sme_HFn_F04_02uM	32895.7	11729	37612.7	31601.7	6705.33	23572	10865	11330	24817.3	14346	26263.7	14121.7	28929	0	0	8679.33	4387.33	48921.7	20931.8	34113	6523.67	29234.3	3860.33	46166.7	37538.7	45378.3	12436.3	5567.67	53045.3	39026.3	5459.33	49924.3	10019.3	12660	22923.7	17947	0	46841.7	19957	3587.33	24931.2	0	0	7896	47003.3	201.333	6897.67	224.333
195	Sme_HFn_F04_06uM	60916.7	25543.3	31417	60032.7	39740.3	47815	61550.7	58081.3	62003	16840	18126.7	21863	41215.7	6981.33	16509.3	23315.8	22129.8	51615.3	40267.3	55934.3	25223.3	44617	1978	57500.5	42021.3	64034	35276	33631.5	56192	62277.3	12796.3	35978.7	12523.7	26077	53819.3	23420.3	1208.33	55807.3	58409.3	28079.2	37936.3	548.333	0	18992.3	58595	1270.67	23346.7	1222.33
196	Sme_HFn_F04_10uM	51915.7	18890	52276.7	10608	3983.67	58961.3	41247.3	56836.7	57532.7	8890.33	6490	22385.3	21985	0	8176.67	0	8231.67	41967.7	29321.1	39510.3	22315.3	40727.3	0	54421.3	15858.7	36173.7	29985.3	31699.3	52533.7	32692.3	19785.3	17364.7	4425.33	22606.7	29307	20582.7	81.6667	61724	27028.3	13962.3	27941.2	564.667	0	25150.3	37522	266.333	0	23.3333
197	Sme_HFn_F05_02uM	62527.7	12782	62502	55121.3	60677.7	38467.3	60742.7	54941.7	61755.3	54627.7	20202.7	23996	38909.3	7667	20777	1571	1487.33	21050.3	40897.5	51422.7	32715.3	45804.7	0	57237	57370	62638.7	38539.3	25609.3	54070.7	61577	22730.3	47285.7	0	11219.7	39344.3	34367.3	6868.67	60428.3	55539.3	15217.7	38238.4	11359.3	0	20340	52011.3	2255	15817.7	0
198	Sme_HFn_F06_02uM	61621.7	19348.7	53994.7	37641	19640.3	47917.7	59133.3	57877.3	61784.3	21598	24670.3	19518.7	28688.7	1179.33	7142	0	0	50311.7	36360.5	40864.3	25938.7	15446	0	61155.3	36038	63399.3	36115	30509.7	55502.7	60529.7	8388	61574.7	0	19023	26447.7	21723	2287	56053.3	36202.3	29420	32859.9	949	166	19223.3	59900.7	0	8373	0
199	Sme_HFn_F07_02uM	60346.3	9058.67	26547	18669.7	1146.67	34999	18641.3	21096	61967.3	17027.7	8642	19287.3	15258	0	22240.3	16012	8569.67	14957.3	21128.4	6732	5496	1062.67	0	61006.7	13716.3	9886	3895.67	31920.3	48525.7	30840	0	4404.33	13478.3	14938.7	14583.7	4921.33	0	37568	27335.3	12843.3	16515.5	0	0	5184.33	35416.3	0	616.667	0
200	Sme_HFn_F08_02uM	63231.3	17227	52869	26172.3	2626.67	55492	61286	51787	61864.7	28479.7	4314.33	15171.7	51713.7	0	22733	0	0	18065.3	33008.6	45793.7	24910	50143.3	0	61136.7	27611.7	63711.7	27483	133.333	36696	62331	25204.3	56365.3	4017.67	16456.7	51642	15429.3	1906.67	42022	45307.7	25389	32915.1	5196.67	151.333	14589.3	57431	525.667	21063	294.667
201	Sme_HFn_F09_02uM	41911.3	9149.33	9449.67	8345	2518.33	30667	28485.3	53540	62053.7	25381.3	149.333	15625.7	32098.3	0	0	0	0	16252.7	21333.4	39266.3	21196.7	14728	0	0	3666.33	41690.3	36768.7	0	1499.33	55227.3	9392.33	49865.3	0	0	10549	5240.67	2371	2466.33	26154	21768	16004.1	0	0	12748.3	67.6667	0	373	0
202	Sme_HFn_F09_06uM	63268.7	39166	58890	46421.7	11641	60977.3	61657.3	58112	61936	51875.7	16284	22800.7	60174	230.333	17267	0	0	55704	43089.2	52794	50215.7	57910.3	0	1316.33	31816	63866.3	54289	0	14507.7	62791.3	56063	61744.3	7683.33	5075	49937	43323	6230.67	55003	54082.7	20697.7	36432.4	5793	2039.33	24575.7	800.333	1889.33	45778	0
203	Sme_HFn_F10_02uM	63399.7	60567.7	61872.7	58762.3	57381.3	58550.7	61155.3	58382.7	62004.7	57188.3	50521.3	23207.3	60725.3	13441.3	22705.3	1424.33	0	51421	51691.6	57716	62170.3	56870	0	61375.7	59180	64313.3	61088.3	1070.33	49133	63085.3	58357.7	58522	0	19589	57591.3	54951.7	17804.7	58396	54076.3	17862.7	45764.5	26222.7	7496.33	34813	61978.3	1358	55515.7	950
204	Sme_HFn_F10_06uM	222.667	0	0	0	0	0	482	497.667	514	0	0	10294.3	0	12067.3	0	12712.3	0	0	918.911	0	0	0	0	0	0	987	0	0	3434	0	0	0	1249.33	9	0	0	0	0	0	1397.33	283.967	0	0	0	215.667	1642.67	0	0
205	Sme_HFn_F11_02uM	30274	9882.33	210.333	35786.3	10321	13000.3	4891.33	10267.7	16569.3	18146	5419.67	15835	16695.7	0	8442.33	0	0	7064	11901.9	34726.3	6474	13677.7	0	43152	17798.7	31215.7	0	1626.67	29352.3	17460	23410	26425.3	1023	5219	41853	15881.3	5243	44092.3	47612.7	0	20312.1	2401.33	1260.33	1317.67	6286.67	372	0	0
206	Sme_A_F01_02uM	56752	54037.3	58465.3	62950	11477.3	59015.7	55383.3	30092	50409.3	39515.7	31074	19263.7	54668.3	44631.7	21040	30657.3	44550.7	57376	47359.9	58927.3	46100	54398.7	55127	48089.3	58767.7	51621	62012	39708	56243.7	57176.7	30358.3	53865.7	56950.3	62850.7	56632	63184.7	16478.3	56095.7	54295.3	17311	51944.1	21956	17298.3	15689.7	3661	4299.67	5723.67	1304
207	Sme_A_F02_02uM	40074	28689	52535	49336.3	7584.33	35823	23503.3	39053	49324	53407.3	15526.3	19481	29463.7	2769.33	21721.7	29659	30020.3	59196.3	34420.4	59246.7	43151.7	43969.7	55028.7	15277.7	59963.3	46734.7	61170	38979.7	56258.3	50210.7	30243.3	2103.67	9750.33	61518	37178.7	59227.3	287.667	40072.7	61829	15427.3	41610.1	1181	206	2310	2836.67	6046.67	420	0
208	Sme_A_F02_06uM	48840	32607	60712.5	60834	17500.7	48294.3	41808.7	24016.3	52399.3	52801.3	32709	19196	57939.3	8240.67	20482.3	26887.7	36694	60540	42395.8	57877.3	37117.3	52333.7	54887	31667	60603.3	55800.3	61048.7	35440.7	55258.3	55289	51781.7	11019	7666.67	62581.7	48678.3	57139.7	107.667	40624.7	52015	14323	44446.8	9844	1851.33	14154.3	4551.33	7068	392	196.667
209	Sme_A_F03_02uM	19330	15591.7	13784	10742.7	1657.33	13351	8682.33	3473.67	36760	10257.7	5612	17559.7	9263	1045.67	3035.67	18572.7	19014	41493	14003.9	56456.3	23315.7	23055.3	44986.3	883.667	58437	38214	35623.7	39608.7	53630.3	43600.3	28702.7	129.667	0	57513.7	36403.3	57345.3	469.333	56083.3	45144.7	2274.67	34980.2	0	0	2686	2010.33	1685	0	0
210	Sme_A_F03_06uM	47883.3	20236	41604.7	49582	12327.7	20611.3	47374	32868.3	55967.3	47066	7021.67	20071.3	28636.3	3499.33	19160.7	21825.7	33992	58761.3	33828.8	52210.7	46223.3	27627.7	49633.7	25648.7	60426.3	61188.3	61325.7	35120.3	55345.7	48237.3	52351.3	6246.33	860.667	58590.3	39978	59986	0	53948	57895	3498.33	42642.2	1728	699.333	12456.3	1327.67	1906.67	0	0
211	Sme_A_F03_10uM	40505.7	36262	55398	56443.7	12642	53828.7	45569.7	50562.3	48180.7	49403.3	19122.7	17719	56016.7	11033.7	21788	30473	33497.3	61006.3	41964.8	55267	35188	41863.3	52114	23545.7	58820.7	47522.3	61816.7	38056.3	55859	48041.3	53622.7	8729.67	1976.67	58773	56924.3	60635	0	56322.3	55985	12888	43553.2	9787.33	2673.33	15117.3	6077.67	5299.67	0	587
212	Sme_A_F04_02uM	4958.67	1371	25298.3	17024	11450	23043.7	1659.67	5060.67	1685	19823.3	1312.67	7047.33	22927	0	0	0	1836.67	2971.33	9361.47	53048	939.333	722.667	6313	324.667	9679.67	18679.7	7634	26238.7	8796.67	11807.7	46236.3	14112.3	0	2123.33	39565	58060.3	4249.33	57166	12796	1241.67	18924.6	0	2248.33	2078.33	561	0	0	0
213	Sme_A_F04_06uM	20755.3	2128.67	35501	26474.8	10274	19016.7	1451.33	9769.67	6293.33	31298.7	2139.17	24088	23850	2249.33	22490	29479	1331.67	4758.33	13152.8	56223	2301.33	29307.3	21883.3	74.3333	42374.7	6396.67	23303	35645.7	37536.7	30335	36248.3	12154.7	29919	26926.3	52704.3	57373	0	60709.3	54768.7	11020.7	30809.2	1784	1136.17	668	1604	1917.33	1582.33	389.667
214	Sme_A_F04_10uM	41043	9438.33	63517	52921.7	27085.7	31297.5	53291.7	42981	51775.7	44788	9511.67	17058	44160.7	9737.67	21276.3	19858.8	45034.3	49688.3	38418.1	54069.3	51246.7	30705.3	47917.5	25452.5	55181	49254	44600	39477.5	51821	56759.3	33976	2717.33	5956	61292	20792.3	52189.7	0	58909.7	44891.7	6171.67	39360.4	8526	1271.33	7771	0	0	464.333	0
215	Sme_A_F04_20uM	56211.3	20065.7	48653.7	43001	26427.7	39029.7	58582	31378.3	53027	51329	16965.3	8119	51071	3332.67	21615.3	17487	16316.3	59136	38301.8	50345.7	40654.7	56610.7	32329	41329.7	58550.3	56757.7	60822.3	34209.3	55991.7	58939.7	54171.7	15673.3	945.333	61979.3	38528	47349.3	0	56022.3	55077.3	14974.7	43814.4	6696	2702.67	15916.7	0	991.667	0	21.3333
216	Sme_A_F05_02uM	49209.3	43586.3	44051.3	59377	16084.3	44708.3	40027.7	40207	52237.7	58148	15224.3	19530.3	61281.7	21867.7	21200.7	25411.3	38795.7	60900	43047.1	56964.3	45752	57316.3	53976.3	30034.3	58585.3	48239.7	62095.7	38313.3	56352.3	50736.3	35798.7	6202.67	7135	62568.7	44772	49889.3	0	50601	60374	9488.67	43785.4	12134	1866.33	19320	6784.67	6083	0	790.333
217	Sme_A_F05_06uM	42114.7	41856.7	55811.3	55884	13487	60581.3	44908	50955.7	46500	57173	42967.3	19798.3	61118	11517.3	21621	26955.7	44703	41681.3	44750.6	48896.3	43634.3	30630.3	53371.3	32668	60754	50798	60655	35147	55109	51839.3	24930.3	30565	0	48044	49549	43721	1774.67	56125.3	54616.3	6240.67	41641.4	27075.7	13107	15754.7	3265	3530.33	734.667	1559.67
218	Sme_A_F05_10uM	53852	60959	61472.7	56921.3	13080	48058.7	61455.3	49412.7	56308	54347.7	45079	18653	60423	29202	21141.3	30152.7	45012.7	59763.7	50356.5	50310	57578	55090	54996.3	57057.7	60716	42185.3	60792.7	39357.7	55852.3	57581.3	55821.3	2730.67	0	62402	53334	59453.7	6831	51399.7	44482.3	12722.3	46398.6	25937.3	19491	17768	12268	8540	2623.33	1725.33
219	Sme_A_F06_02uM	52916	61338.7	60210.3	53468.7	19013.3	54741.7	46746.7	52291.3	48839	57205	57683.3	19824	60464	35767	21173	29649.7	41666	60105.3	50830.4	54630.3	43651.3	55201.3	54541.3	50509	60595	37444.7	61131.7	35890.3	55927.3	57573	56085.7	5434	0	62658	44827.7	58549	3762.67	55228.7	52570.3	10897.3	45310.6	39351.3	15411	7856.33	10767.7	8664.33	4919.67	923
220	Sme_A_F06_20uM	36039	15906	36077.7	58032.3	17288.3	48647.7	22139	24385	34861.3	60235.7	9968.67	17878.7	61009.3	11945	20922	28700.7	29545	61380	35164	56460	25798.3	30938.7	54056.7	4308	60642	46560.7	39500.7	38866.7	56163.7	38657.3	37011.7	27905.7	3474.33	51150.3	56553.3	48946	0	60747.7	58379.3	11232.7	39806.1	4130.33	2418	1142.33	1762.33	2038.33	2968.67	156.667
221	Sme_A_F07_02uM	49155	21807.7	37508.7	38066.3	22802.3	33483	46362.3	44207.3	49219.7	47482	12590	20307.3	42018.3	8769	19303	25947.7	31782	57804.3	36203.9	57348.7	55281	30343.3	53515	17803	60373.3	57616.3	61456.7	37490.3	55881.3	56145.3	50126	22011	44972.3	61793	44237.7	45586.3	42.6667	49259.7	45558.7	14175.7	45342.1	1502	1354	14462	2935.33	4081.33	0	191.667
222	Sme_A_F07_06uM	61384.7	29712.3	62403.7	59176.7	29980.3	32089.7	52212.3	50383.7	54201.7	54218.3	17947	23118.7	36811.7	10607.7	22255.7	30513.7	44003.3	60431.3	43704.3	60595.7	57136.7	60246	54830.7	25729	61055.3	56042.3	61396.7	39362.3	55918	59304.3	51022.7	3355.33	56908	62721	56174	63151.7	351.667	57929.7	62190	23844.3	50271	13863.3	2235	9263	5720.33	9106.67	0	0
223	Sme_A_F08_02uM	48702	45987	46029.3	34205.3	5738.33	60371.7	47478	27387.7	45631.3	52807.7	40967.7	19846	36785.3	31718.3	21922.3	29084.3	44925	61405	42009.3	46246	35425.7	34392.7	54874.3	42681.3	54288.3	52679	59290.3	37225.3	52481.7	47683	18347.3	39490	8455.33	54937.7	31186.3	48286.3	10750	42196.3	35586.3	9327	40325.2	19430.3	11533	11197	2011	2138.67	3145	687
224	Sme_A_F09_02uM	37834.3	27374.7	37710	50844	12985	32932	32295.3	44504	50689.7	45913	9986.67	18363.3	50492.7	6214.67	18672.7	21615	35633.3	58492.3	35593.4	50522.3	41942.7	42153.3	53890.7	12729	51503.7	43877	62072.7	39558	56340.7	45878.3	32730	23689.3	14887	62895	42669.3	34405.7	0	42867.7	43342.7	3937.33	39897.8	7602.67	876	12247	3990.67	2860.33	250.333	907.333
225	Sme_A_F09_06uM	57421.7	42203.3	40565.5	61635.7	28537	56493	58905.3	58349.3	61609.7	53698.7	18133	21403.3	54741	22748	21318.7	26663	45007.3	60538	48039.1	59179.3	63340	58055	54985.7	29321.7	60975.7	58034.3	61373	38084	55990	51857.3	57824	22620	6065	62538	56373.7	59838.7	0	61388.7	63062	22153	49045.3	11869.7	3953	17492	5223.33	6607	466.333	503.667
226	Sme_A_F10_02uM	49985.3	27629.7	39411.3	50902.7	11822.3	30670.5	41128.7	35405	42046.3	44264.7	11850	19149.3	29818	1323.33	20085.7	26755	40660.7	60497.7	34494.4	57264.3	42789	55124.5	54996	6758.33	59496	41331	59372.7	39269.3	56027.3	49759	26054.7	4037.33	0	60336.7	50523.7	53093.7	0	48657	47334.3	8026.67	40611.2	7892	509	11038	4317.33	4120.33	1865.33	0
227	Sme_A_F10_06uM	37834.7	20066	24678	50742.7	17510.7	28307.3	40133.3	35299.7	48228	44862.7	20259.7	17866.7	50225.3	14016.3	20692	23414.3	42990	60048	35680.2	51462	46383	40811.3	53539.3	21732.3	60563.3	49078	60313.3	34812.3	52461.3	48662.3	49386	6945.67	617	60460	42622	57922.3	0	40902.3	33478.7	8861.67	40607.6	4597	3641.67	16992.7	4109	4432.33	149	84.6667
228	Sme_A_F10_10uM	45596.3	31435.3	30016.7	56592.7	21412.3	28715	48407.3	45336	52506	49869.3	15886.7	17115.7	59955.3	12022.7	20278	27240	42333	60989.7	40071.6	60127.7	44206.7	50871	54018.3	21870	60686.7	51913.3	62264.3	38363	54534.3	52602.7	45052.7	11640	0	62550.7	57429	62862	0	55059.3	52419	15141.3	44923.5	13427.7	2861.67	15703	4754.67	6830.33	0	501
229	Sme_A_F11_02uM	62728.7	56652	60471.7	58915.3	20437	61738.3	60623.3	56267.3	61446.7	46481.7	15783.3	20230.3	60172.3	30942.7	20652.7	30140	44932	59942.7	50502.3	57496.7	63763	59860.7	54665	37827.7	59051.3	57457.3	60867.3	37991	55367	62263	51551.3	20181	0	62725	47257.7	58691.7	1099.33	59403.7	58894	11604	48320.7	35053	7464.67	18936.7	9372.67	9237.33	2407	3342
230	Sme_N_F01_02uM	53377.7	15350.3	29630	49555.8	25952.7	13048	17269.3	38369	56332.7	3809.67	12481.7	21613	10045	14817	22394.7	30039.3	9939	3554.33	23568.8	46725.7	7525	47585	0	916.333	5134	11068.7	17382.7	0	10879.7	19753.7	3621.33	49073	6023	21884.7	40453	32311.7	0	55888	35052	7751	20563.9	9206.67	0	9322	1130	1447.67	9510.67	0
231	Sme_N_F02_02uM	4580.67	75.3333	1713	21552.7	393	16145.3	239.667	4153	5703	41380	0	7781.33	0	0	4389.67	12668	5753.33	158.333	6789.82	21659.7	4334.67	2840	8995.67	1657.67	2887.33	0	12422	24161.7	28011	204.333	6378.33	1050.67	0	1997.67	2362.33	3060.67	0	21506.3	22650.3	1417	8309.02	0	0	0	383.333	137.333	0	0
232	Sme_N_F02_06uM	36059.7	8846.33	13717.7	41698.3	874.667	46270.7	8979.67	3342.33	35916.7	48516	1802.67	11300.7	20914.7	0	13167	8476	7731.33	37206.7	20791.8	15659.7	11467	33058.3	39538.3	2034.33	9004.67	13318.3	52786.7	38535.3	38074.7	14470.3	8697.67	4177.33	3361.33	7915.33	19568	34771.7	0	20080.3	39282	0	20290.1	0	0	1507.33	0	0	0	0
233	Sme_N_F03_02uM	33037	28611	60949.7	45661.3	5063.67	57558.7	27961	17319	34464.3	43165.3	31297.3	19719	60027.7	885	21729	27604.7	37960.7	27298.7	34084	52709	19244	15218.3	54516.3	46986.7	60203.3	36629	51553	33917.3	52306.3	18360.7	8022.33	38989.3	161	33497.3	33661	58969	7020.67	37297.7	37605	5360	34843.4	7747	6142.33	91.6667	1636.33	267.667	1794.67	0
234	Sme_N_F03_06uM	48655.3	51127	63135	51635.3	11203.7	51492.3	49345.7	38401.7	55192.7	47726.3	52649.3	20969	60216.7	4717.33	21203.7	28306.3	44630	59908	46002.4	53229.3	48094.7	32622.3	54807.3	55795.3	60821	47231	61313	37824.7	55691	47212.3	27196.3	16639	4264.67	33684.3	48716.7	57270	21778.3	47734.7	58148.3	6832.33	43503.7	24626.7	24318.3	4836.67	10345	2171.67	3353.67	0
235	Sme_N_F04_02uM	57165.3	58176.7	50625.7	43097	11839	55494.3	51585.7	50213	49108	58029	42828	19163.3	60687.7	40397.7	20620.3	25843.3	41638	60424.7	48754	41451.3	35052	39498	53861.7	50913.7	60527	50203.3	61232.3	36698	55209.3	52008.7	2868.67	17483.7	1787	57139	43173	58854.3	33401	46262.3	37778.7	6553.67	41770.1	23777.3	12808.3	13670.3	4664.33	4471.33	0	1408.67
236	Sme_N_F04_10uM	61623.3	61810	61400.3	60902	19385	61608.3	54301.3	57651	61599.3	55006.7	43050.3	19514.7	60368	47852.7	21297	28981.7	44767	60925	54150	54966.7	51765.7	47096.7	54922.7	57985	56751.7	55254	61946.7	38970.7	56077	54696.7	15668.3	53806.7	189	62746.3	54959	59591.7	32428.7	51181	54542.7	28231	48777.3	40499	18247.7	16133.7	6221.33	7849.67	1386.33	967.333
237	Sme_N_F05_02uM	179.333	0	0	30616.7	1747.67	1601.67	1923.67	2069.67	414.333	0	0	10628.7	0	5678.67	961.333	17958	8163	200.667	3506.36	36435.7	1893.67	3878.33	1691	118.333	0	347.667	0	0	3120.33	0	0	0	6498	282	0	0	0	10914.3	0	2346.67	3258.97	0	0	344	0	1088.33	0	0
238	Sme_N_F05_60uM	52337.7	61574	60434.7	59609.3	22956	55631.7	50174.3	47838.7	48532	45383	49502.3	19676	57381	43914	21119.3	30187.7	45099.7	60450.7	50721.3	56793.3	44176.7	52558.7	54875.7	56883.3	60696	47161.3	61168.7	38798.7	56289.3	54358.7	7357.33	22569	1174.67	62629	53845.3	55937.7	20403	51559	50165.7	9396	45470	26270	15415.3	8614	6060.67	4025	715.333	0
239	Sme_N_F06_02uM	44799.7	13407.7	63459	60079.7	8186	60836.5	8662	10038.7	31114.7	38316.3	12967.7	23912.7	52616.7	3158.33	21782.7	25063.3	44463.3	10936	30869.5	55133.3	4301.67	27275.3	54366	14241	56948.7	4532.67	22566.3	35427.5	56259.7	16953.3	33410.7	15446	0	2211.5	23066.3	57312.7	7841	53312	53469	1563.17	29703.7	6301.33	1040.67	567.333	1380.67	2289.33	6186.33	0
240	Sme_N_F06_06uM	41930.7	25872.3	50972.7	58288.3	9050.67	60395.7	33844.7	1835.67	45196.3	55499.7	35986	19880	45408.3	6627.33	21445	28929.7	31636.7	60361	37527.1	55506.7	8455.33	22789.3	50940	49038	56921.3	28346.7	51732.7	36749.7	56308.7	33489.7	37165	53944.3	5308	12665.3	35379.7	58877.7	17573	58742	56001.3	12750.3	39296.7	10946	8876	1996.33	1110	274	1514.33	800
241	Sme_N_F06_10uM	48279.7	39667	53970	60988.7	11735	58598	38169	18375.7	53416.7	57850.3	57685.7	18943	61193.7	12139.3	21336.3	30637.3	44415.3	61104	45172.5	58152	41540	46873	53415.3	44916.7	60827	48549.3	62361.3	39150.7	56528.3	48524.3	20980.3	63901.7	15407	32679.3	57344.7	57168.3	24233.3	61915.7	61047.3	8289.67	47775.8	25246.7	18293.7	5521.33	4843	285	0	0
242	Sme_N_F06_20uM	44244.3	39946	48225.3	55959.3	5552.67	57266.3	51548.7	19625.3	45926	48815	48855.7	18869.3	60422.7	7916.33	20998	25299	44398	60058.7	42584	46949.7	38159.7	17563.7	54273	55206	59288	51297.7	60698.7	34467.7	55082.7	50141.3	18152.3	50405.7	1015.67	34155.7	48219.3	58882.3	6731.33	50305.7	54985.7	7497.67	42299.1	13550	31631.3	6746.67	6316	297.333	0	0
243	Sme_N_F07_02uM	44316	42843	56101.7	53525.3	3119	56652.7	41398.7	45531.3	44010.7	27093	31763.7	20524.7	57237	18159	21638	26210.7	39901.7	43264.3	40327.8	48559	42276.3	57716.3	53299.7	42391.7	60740.7	45064.3	60378.3	34903	55079.7	42300.3	3559.67	54336.3	0	61597.3	46966.7	58227	9150	51669.3	50790	23946	43950.3	23192.3	9520	10933	3474.67	2513.67	1207	534.667
244	Sme_N_F07_06uM	45719.3	61173.3	61430.7	58797.7	8292	45578.3	49267.3	26904.7	44265.3	55132.3	49271.3	19010.7	60710.7	40862.7	21233	30134.3	43698.3	59917.7	47401.4	52267.7	46343.7	51370.3	54533.7	58796.7	60680.7	52629.7	60904	37574	55919.3	47105.7	3853.33	7770.67	5131	61835.7	39639.7	58259.3	20206.7	53225.7	48859	28560.7	43845.3	30743	18579	8935.67	8060.67	6108.33	2501.67	254
245	Sme_N_F07_10uM	50971.3	60269.3	63279.7	57585.7	7678	57272	49523.7	47846.7	58139.7	54547	58608.3	19191	60915	40387.3	20680.7	26456.3	44752.3	60827.7	51506.9	54716	56856.7	42952	54481.7	60320	60540.3	47042	61674.7	36564.7	55395.3	52802	11680	51089.3	0	60943.3	36388.3	59741.3	17701.7	52014.7	56614.7	37559.7	46475.9	34145.3	20151	14707	11294.7	6435	0	1320.67
246	Sme_N_F07_20uM	49638.3	61715.3	56347.7	57010.7	8034	58413.7	46976	40136.3	52874.3	54943	54884.3	18977	60360	41909.7	21899.3	29028.3	44098.3	57514.3	49657.1	54058.3	46380.7	55200	54825.7	57492.7	59564.7	54758.7	61589.3	38341.7	56048.3	51537	15281.7	30797.7	2901	61754.7	38290.3	60069	23851.3	56115.7	54317	34743.7	46658.8	23568	15453	14044.3	9299.67	7064.67	0	1694
247	Sme_N_F07_60uM	52218.3	35342.3	61745	55634.8	1492.67	46018	48599.7	51433.3	49673.3	50556.7	10967.2	21058.3	58419.3	45269	21123	25572.3	44631.3	32913.3	42994.3	50932	50091.3	55235.3	54093.3	56422.7	55394.7	48292.3	61163.7	36943	55371.3	37088.3	3848.67	4040.33	1434.67	62355.3	36742.7	55296.7	10011.7	55923.7	44989	36932.7	41783.5	15619	10083.2	5930	6019	3112.33	303.333	1327
248	Sme_N_F08_02uM	51650.3	45198.7	37429.7	56272.3	6332	49591.3	42943.7	0	57905	56255	21883.7	23006.7	59475.7	11597	20980.7	28585	42525.7	60456	39967.7	51905.3	16298.7	27065	46670.3	38349.3	60374.7	50627	49132.7	30025.3	52762.3	38623	5249.33	43802.7	5469.33	30374.3	42773.3	57568.7	11171	58506.7	56661.7	2558.33	38670.5	6660.67	14008	5760	1539.67	897.667	0	435
249	Sme_N_F08_06uM	49858.3	59672.3	40162.7	59072	8409	61858.7	43828.7	46461	46615.7	51628	38257.3	19859	60973	21286	21233	29073	43579.3	58898.3	46037.4	56815.7	45545.7	52114.7	53940.7	43926	55106	45551.3	61885.3	38443	56058.7	51241.7	32381	41138.3	3329	41443.3	57797	42386.7	23761	50730.7	59811.3	6152	45670.3	15007.7	18879.7	15346.7	6431.33	1568	0	290.333
250	Sme_N_F08_10uM	55833	57452.7	52938	56497.3	6396.67	60557	45688	46586.7	39465	56075	50658	20247.7	60776.3	29946.7	21180.3	23388.7	43044.7	61486.3	48226.8	47069	47452	30624.3	54217.3	48454	59057	48378.3	60597	33905	55051	51721	24462.3	54541.3	8000	55472.3	55796.7	58319	17180.3	56786.3	58171.3	10176.7	46262.8	35267	18983.3	10765.7	4586	2215	2685.33	160.333
251	Sme_N_F09_02uM	56450.7	59344.7	55834.3	61133.7	4421.33	38982.3	42564	44013.7	53358.3	55235.3	40839	19930.3	60766.3	40715	21255	27864.3	42455.7	60777.7	47792.8	59085.7	27954	60218.7	52723	36994.3	56124.3	41527	58365.7	38819.7	56549.3	50142	2814.67	20073.3	12941.7	46740	31857	32080.7	7737	60663.3	61060.7	6041.33	40723.6	32700	14381	16358.3	6010	2876	0	880.333
252	Sme_N_F09_06uM	45572.7	56190.3	59730.7	56341	4468.33	58701.3	46247.7	20425	46085.7	26210	46969.3	20875.7	60639	41738	21153	25844.3	41936	59978.7	44748.9	46566.7	30287	56678.3	54289.3	51537.3	60621.3	40754.3	60686.7	34335	55193.3	48755.3	19907.3	51745.3	4990	62148.3	42260.3	57852.3	3604.33	51269.7	51405.7	35461.3	44244.4	21641	14266.7	9862.33	5770.67	5999	6363	1101.67
253	Sme_N_F09_10uM	58913.3	59372.3	61301.3	49831	5060.33	59312.3	55528	51708.7	56674.3	57314.3	51758.7	22919.7	33757.3	48501.7	22614.3	30268.7	45031.7	61339	50360.3	52830	58971.7	52841	55059.7	60561.7	42358	59973.7	58022	39450.3	57035	55830.3	18407.7	5799.33	58238.3	62024.7	45732.3	62315.3	7157.33	44183.7	59753.7	32310	47827.3	34788.7	9107.67	13486.3	8397.33	8778.67	1699.33	1643.67
254	Sme_N_F10_02uM	37833.7	31556.3	31205.7	58356.3	6152	31435.3	34443	829	46393	44255.3	19434.3	22506	44428	34235.3	22011	22068.3	25279.7	57337	33544.9	42354	6649.67	17054.7	46997.3	2970.67	29490	33638.3	3195.33	39591.7	54002.7	16983	242.333	11031.7	912	10852.7	23807.3	35676.3	2386.33	36422.3	55134.7	9249.33	23469.6	19094.3	2125.67	1028.67	966.333	1139	0	387.333
255	Sme_N_F10_06uM	43036.3	55359.7	28644	53301	2023	46570	45273.7	43195.7	48266.3	57678	46374.7	19976.3	47829.7	47629.7	20479	27872	35660.7	61128.3	44131.4	55084	38847.3	40472.7	54872.3	50613.3	60713.7	50596	62488.3	39175.3	56045.7	46037.3	17207.3	33308.3	2523.33	62699.5	54537.7	53436.7	17095	48718	51356.3	34308.7	44791.4	32622.7	12404.3	10485.3	4783	5854.67	0	427.333
256	Sme_N_F11_02uM	55597.7	37462.3	39637.7	57063.7	8554.33	59094	57388	47193	50905.3	56325.7	31212	21787.3	44258.3	47317.3	22228	30791.7	45122	44705	45455.8	55213.7	53395.7	35816.7	54719	61177	57888.3	37703.7	60294.3	38878.3	56114.3	51473	16424.3	48474	207.333	58435	48361.3	48281.3	5529.67	58548.3	51190	42157	44906.3	17503.7	10834	11144.7	3364.33	3114.33	12297	1631
257	Sme_N_F12_02uM	14887.3	17949.3	14315.3	36021.7	8773	34089	30158.3	33523	40402.7	52895.7	16171	23320	57818.7	6351	22540.3	26655	24356	60741.3	29896.9	52709	26008.3	62879.5	55063.3	8308.33	61429.7	44812.3	60838.7	39718.7	56938	33926.7	50366.3	8450.33	1546	58929	54335	63820	0	42066.3	50200	12906	41617.3	5470.33	1771	1736.67	940.333	3946.33	0	914
258	Sme_N_F13_02uM	46015.7	3963.67	63344	59161.7	5293.33	53531.3	2237.33	1242.67	34363	33687.3	7722.33	21025	56484.7	0	21148.7	22322	22637.7	40038	28648.2	57997.7	11534.3	16204.7	28203	2336	44583.7	21838.7	16120.3	25504.3	48597	499	9138.67	29681.7	0	38552.5	44714.7	35888.3	2676.67	56066.7	36719.3	1015.67	26342.9	3646.67	4474	779	1121.67	0	0	1383.67
259	Sme_N_F13_10uM	51303	59548.3	40193	55575	20729	58842.3	43326.3	47821.3	42662.3	51507.3	62644.7	18557	45045.7	0	20355	26523.7	42112.7	60197.3	45433.9	47739.3	29921.7	40206	54008	46898.7	58874.3	45352.3	60462.3	38066	55226.7	36480.3	31403.3	9530.67	21632	35691.3	51462	55813	28602	57726	59648	4700	43237.2	23938.7	25319	1748	4193.33	0	3036	0
260	Sme_N_F14_02uM	36413	37516.7	30999	20925.3	4876	39048.7	27715	27861	40788	44334	41532.7	19256.3	17198	1193.67	19022.7	24536	34398	39601.3	29626.7	36869.3	15113.7	30453	51153.3	22304	40040.7	36256	47113.7	31298	52844.3	32013.7	1336	33071.7	21640.3	13653	10648.7	22941.3	11997.7	45264.7	32075.3	1348.67	29404.4	15658.3	10836.7	857	3311	0	0	0
261	Sme_N_F14_10uM	56321	60535.7	46695.7	57724.7	12826.3	61155.7	56350	56628.7	53203.7	51295.3	56602.3	19759.3	59881.7	8641.67	20545	28622.3	44115.3	60153	49475.4	52102.3	41368	54783	54616	57233.3	60389.3	48728	61230	37100.3	55328.7	51133	50022.3	58833.3	71.3333	34163.3	50869.3	57492	25887.3	56308.3	52170.3	3546.33	47991.5	25612	37190.7	4023.33	15483	1626.67	1806	0
262	Sme_N_F15_02uM	0	0	2164	518.333	1946.33	10179	0	0	2419.67	0	0	0	5307	10945.5	0	0	0	214.333	2246.28	0	1579.67	16770.3	0	0	0	11823.7	0	1227	0	0	10702	2471	12682.3	1175.5	0	2833	0	182	0	0	3072.32	3356.33	103.333	441.333	1945.33	749	0	0
263	Sme_N_F16_02uM	50221.7	36973.7	43538	56227.8	6789.67	58552.3	58882.3	57235	48287	43798.7	9985.17	19746.3	49592.3	46450.3	20737.7	29344	44091.7	27979.8	42573.7	53480.3	50053.3	35360	54403.7	60184.7	51409.3	43129	50667.7	35704.3	55242.7	53727.3	7545	12402	48882	61063.3	30102.7	40714	2951.67	32304.7	27453.3	40534	40339.1	20294.3	2325.17	4846.67	2113	3527	266.333	2690
264	Sme_N_F16_10uM	43186.7	61649.3	53632.3	53990.7	10997.7	48682	53021.3	57670.3	45898	45569.3	45686	19384.7	52585.7	44287.3	20772.3	28923.3	41950.7	60649.7	47963.8	53657.3	64166.3	40294.3	54862	57554	60138.7	44233.7	61558.3	37591.3	56098.7	51328.7	14802.7	29531.7	4388	62156.7	34147	44717.3	11489.7	49597.7	42768.3	34954	43754.1	43765	13080.3	13767	7270	8156	677.333	1519.67
265	Sme_N_F17_02uM	47022.3	34365.3	53792.3	53409.7	11849.7	58642.3	51379.3	15697.3	33316	57337	30879.3	18168.7	55664	25931.7	20323	29068.3	40771	56154.7	41747.5	51257	39051	40263.7	45728.3	22366.3	60725	40327.7	55318	37004.7	55602.7	48789.3	15550.7	38075	3138.33	11056.7	49422.7	48510	11089	50891	55657	5332	38991.2	6900	2676	0	9762	8076	0	875.667
266	Sme_N_F17_06uM	56372	61183	43379.7	58592.3	22762	46388.7	42257	52248.7	38837.7	49773.7	32447.7	19044.3	45558	34137.3	21839.7	27390.7	44555.7	59739	45882.2	55509.7	61353.7	25712	52657.7	50700.3	60921.3	43021.7	61093.3	38447	56194	51906	11883.3	17685.3	0	41825.7	27614.3	36526.3	39275.7	46683	42946.3	3763	41097.8	28442	11023.3	4798	4419	1672	208.333	0
267	Sme_N_F17_10uM	39086.3	37252.7	41161.3	44863	25331.7	60016.7	40066.7	53695.7	53612.7	39897.7	42733.3	19566	44699	41802	20668.7	28779	43225.3	61771.3	44614.4	48951.7	50230	54564	53999.7	39863.3	60344	54253.7	60055.3	35530.3	54881.7	53776.3	21679	55794	9179.67	60082.7	44843	46017	38204.7	55062	47695.3	7357	47250.4	22284.7	10677.7	4754.33	2577	993.667	0	0
268	Sme_N_F17_20uM	52372.3	61897	57692.3	50582	37137	48351.3	46687	44351.3	53149	57898.3	62701.7	19759	49501.7	41022.3	21118	30428.7	42697.7	60907	51129.9	54514.7	41794.7	45810.7	53926.7	28521.3	58466.7	47692	62052	39151.7	53447	54637	21182.7	54131.3	55590.3	44927.7	33493	54644.7	46704	44616	44246.7	5555.33	46977.5	19499.3	17651.3	2700.33	3434.67	1795.67	713.667	0
269	Sme_N_F18_02uM	56481.3	39835.7	30165.3	30253.3	3501.33	40552.3	51815.7	52545.3	45672.7	53171	23383	18890	45175.3	36046	20240.7	30428.3	44566.3	59793.7	40863.9	47900.3	55268.7	29651	54632	41498.7	47168.7	45172.7	57232	38001	53966.3	40747	211.333	10554.3	4242	58700	20130.7	29486.3	2640.33	51523	31042	10374.3	35988.4	20027.3	1186.33	4088	3434.33	4039	0	1558.33
270	Sme_N_F18_06uM	63058.7	61045	49675.3	62224	9850.33	60638	61959	38362.7	55612.7	52531.7	38446.7	19384.3	36013.3	33452.3	21594	30069.3	44757.7	60141.3	48517.9	54294.7	63268	38400.7	54922.7	44377	60763.3	53411	61093.3	39374.7	56023.3	32982.7	6081.67	10606.7	1716	62632	40063	50466.3	7416.67	42167.7	49779	10619.7	41492	17436	3756	7436.33	6350.33	4913.67	0	1059.67
271	Sme_N_F18_10uM	51827	57735.3	38028	54602.7	8159.67	50729.7	60743	32955.7	43291.7	52928.7	41896.7	19263	44571.7	38778	20433	24237	41639.3	61007	45259.6	47235.7	50423.7	42240.3	54765	53760	59403.3	52348.3	60331.7	35558.7	54279.7	45655.7	4216.33	38231.3	0	61813	23583	49135	10928	38258.3	31135	14791	40665.1	6575.33	7589	7355.33	3918	3559	0	733.667
272	Sme_N_F18_20uM	50303.3	61871	53576	52920	10480	48282.3	50308.3	52760.7	54163.3	52740	41534.7	19659.7	51209	40049	21214.3	29735	44773	60827	48386.5	54824.3	55878.3	44538	54404.7	56582.3	60447	54223.3	62283.3	38110.3	56006.7	60405.7	4237.67	53814	15565.3	59145.7	29207.3	40577.7	10087	45775	56616	12953.3	45636.5	5237.33	6418	8681.67	5884	2763.33	0	490
273	Sme_N_F19_02uM	55246.7	53885.7	27048.3	24219.7	2117.33	41620.3	46589.7	44546	56523.7	48715.3	37326	18657.7	37877.3	33820	20334.7	28635.7	44923.3	60515.3	40998.3	32022.3	39051.7	12603.7	54805.7	49779.7	45797.3	47021	61021	35927.7	53762.7	47049	2306	15261.3	796	47425	23090	24662.3	17629.7	41840.7	37402.7	15631.3	34462.8	30196	16313.7	1200	3301.67	1204	0	30.6667
274	Sme_N_F19_60uM	58446.3	61499.7	44457.7	59164.3	10290.7	59708.7	48699	50291	45376.3	47554.3	62241.7	19670.7	47222	40116.3	21104	27374.7	44095.7	60231.3	49293	53740.3	47281.3	48436.3	54738	56600.7	60742.7	43255.7	61330.3	39248	55950.7	55175	15236.3	17902	1540	61452.3	48677.7	56201.3	22642.7	49998.7	48037	20159	44909.3	30871.7	18885	6748	11013.7	2998.33	3652	0
275	Sme_N_F20_02uM	45648	32949	42584	28315.7	1634.67	29040.3	52742.3	41009	48860	47902.7	14897.7	18410	26024	35177.3	20015.7	28687.3	36902.7	59401.7	36205.9	26996.3	42739	29287	48375.3	48356.3	23492.7	48746	57619	33564	49684.3	45540.3	0	626.667	5683.33	49745.3	18345.7	49867.3	1300	50787.3	32829.3	35082	33179.3	8496.67	3483	7115	4359	2643.67	0	856
276	Sme_N_F20_06uM	51595	57289	59028	54237.3	6700.33	54566.3	53586.7	49153.3	56592	47357.7	30616.7	19130.3	51099	27236.3	20872	27609	44445.7	60576.3	46938.6	43964.3	49391	48953	54800	47649.7	57516	54639.7	62059.7	38538.3	55561.7	52697.3	5396.33	31534	1518.33	52321	31291.7	41539.3	4871	46802	41715.3	31191.7	41138	25501	7759.33	15804	6049.33	2684.67	0	1034.33
277	Sme_N_F20_10uM	54697.7	59521.7	29626.7	47183.7	4590.67	59917.7	58692.7	54653.7	50394.3	45502	28733.3	18831.7	48581.7	44660.3	20201	28830.3	43696	60209.7	46044.1	51653.3	46290.3	39924.3	54907	57794.3	60018	51304.7	61292	35825.3	55125	52672	6690	27109.3	1092	58709.7	29788.7	51079	4759.67	38999.7	44353.7	40090.3	41469.4	21081.3	14490.7	17675.3	6195	6499.33	1817	1785.33
278	Sme_N_F20_20uM	55693.7	60208.3	63444.7	59228.7	6920	56034	30842.7	47886.3	56287.7	56441.3	36114	19010	46458	42737.3	21029.3	12609.3	44156.8	60220	48178.2	55247	62296.7	42977	52777.5	53895	60570	51452.3	61162.3	38705	55729	58112.7	9592	7744	2031	62252	36766.8	56141.7	4061.67	60191.3	53213.3	48187.7	44245.9	21167.3	8116	11244.3	8103	6023.67	1290.67	641.667
279	Sme_N_F21_02uM	44407	25037	54298.7	47138.8	1652.33	55805.7	50516	29784	57909.7	36616.7	36710.7	19823	30632.3	23138.3	21211.3	29525.7	43715	41014.3	38558.4	47338	12440.3	3991	46922.7	48095.7	40967.3	40106.7	50634	31685	55222.7	38738.7	3049.67	11838.7	11182.7	30464	46816.3	15762	7985.67	35397	49960.7	9037.67	31429.9	3441.33	17007.7	2160.33	3684	1362.67	1745	0
280	Sme_N_F21_06uM	52696.3	61706.3	45660.3	51541.7	11356.7	60748.7	50471.7	48380.3	49517.3	46535.7	49444.3	19520	48613.7	24759.3	21065.3	28574.3	43609.3	60618.3	47044	56661.7	18489.3	29618.3	53701.3	52868	60077.7	48240.7	61596.3	37969	56187.3	52077.7	26876	49723.3	0	37754.3	42947	53401.7	28994.7	40563	52420	14394	43008.4	13807	23620	2530.67	9363.33	1095.67	0	0
281	Sme_N_F22_02uM	57880.7	44412.3	41518.7	43411	3277.67	33370.7	56281	55534.3	52533.7	58325.7	35086.3	17706.3	32406.7	36183.3	20248.7	22784	43592.3	60678.3	43632.8	42620.3	38053	34940.7	51760.7	44750	43841.3	53547.3	60774	36462	46127	51639.3	2101.33	26190	3338.33	59127.3	31261.3	44776.3	13637.3	45328	47636.7	13454.7	38895.6	7543.67	10690.3	12938	2447.33	3336	0	1112
282	Sme_N_F23_02uM	55474	42943.7	51087.7	37476.3	2334	36641	51083.7	37294.7	53614.7	53229	19373.3	19461.7	30119.3	37812.3	21176.7	29724	43330.3	59855.3	40778	45988.7	45329.7	24136	55075.3	44408.7	30385.7	48620.3	58743	39163.7	55448	54802	769.333	3034.33	7055.33	62137.7	26599	12685	1767.67	48155	54634	27205.7	35946.9	23930.7	4362	5254.33	5619.67	4748.33	1415.67	1475.67
283	Sme_N_F23_10uM	54093	47005	52341.3	53739.3	3329.33	52780.3	50562.3	51208.7	53959.3	53552.7	37388.7	19474.3	37021.3	44378.3	20099.7	26755.7	44459.3	43950.3	45318	49160.7	42809.7	44918	54345.3	60909.7	53221.3	48133.3	60113	35336.3	55023	46469	7749	32697	4167.33	62455.3	24138.7	37975.3	3973.33	37158.3	31248.7	48761.3	39600.1	38805.3	12261.7	11931	3982.33	3130.67	597.667	1120.67
284	Sme_N_F24_02uM	48764.7	61402	53031.3	53123.3	7558.33	39625.3	38200.3	44085	53671	55735.7	33215	20117.3	53838.3	42472	19183.3	27242.7	44447.7	60806	45998.4	56720.7	34469.7	50122.3	53664.7	42547.3	51572.3	49452.7	61822.3	39025.3	55483.7	52342.7	11292.7	33777.7	58839	56613	28197.7	56491.3	9976.67	48888.7	44187	24026	44774.4	20505.3	7361.33	12206	5055	2098	160.667	1595.33
285	Sme_N_F25_02uM	31913.7	26557.3	44027.3	58833.8	3563.67	52942.7	13441	7396.67	41269	60818.7	23014.7	20491	61643	24733	22770.3	30633.7	29807.3	19514.8	33298.4	58022	19836.7	31956.3	54522	6644	55255.3	43629.7	37140	38423	56566.7	11443.7	28415.7	17458.3	7023.67	41877.5	34290.3	53095	2103.67	27042.7	50737.3	4642.33	33774.2	2061	3714.67	1818.67	2688.67	2641.67	3053.33	731.667
286	Smw_F01_2uM	9057	50759	2022.33	1315.67	2596	3462.33	24494.7	2601.67	971	7841.33	23012.7	0	0	0	0	7361.33	3874.67	4005.33	9067.58	0	309.333	2477.33	0	0	4385	12489.3	1167	0	4800.33	26198.3	20543.7	4456	0	1061.67	5365.33	1917	1509.67	8050	25945.3	0	6033.77	1349	1084	1789	58	0	0	0
287	Smw_F02_2uM	43832.3	41431	28285	36759.3	505.333	29853.7	18926	39287	34455.3	52646	45318.3	18418	29872.7	0	19878.7	21877	40473.7	60602	33483.2	31416	8005.33	694.333	46521	34921.3	33998	34194.3	59229.3	34389.7	51525	37395.7	2168	2525.33	175	4783.67	15355.3	17941	12123	26772	27156.7	3201.33	24064.5	1574.67	12134	0	3110.67	0	114.667	373.333
288	Smw_F03_2uM	39566.3	59470	36975	41312.3	5488	22549.7	45539	45142.3	55630.7	45555.7	17600	18647	13425.7	33027.3	21050.7	21625	43223.7	58329.3	37522.3	38260.7	46468.3	47616.3	52449.3	52460	37290.7	44822.7	26402.7	37972.3	55988	48603.7	1342	5224.67	20736.7	43253.3	45767.7	30870.3	3515.33	37918.3	42572.3	17957.7	35976.8	11996	4546.67	4258.33	1785.67	1770	0	713.333
[truncated: 3 more columns]

## Sheet: IgM - pvalues
		S. haematobium infected vs Non-Endemic		S. haematobium vs S. mansoni infected		S. mansoni infected vs Non-Endemic
Fraction ID	Fraction Name	P.Value	adj.P.Val	P.Value	adj.P.Val	P.Value	adj.P.Val
1	Blk1	0.034386	0.04522	0.0110589	0.463916	0.87459	0.888506
2	Blk2	0.822063	0.851634	0.552509	0.977036	0.815266	0.835575
3	Blk3	0.968596	0.971971	0.923378	0.990721	0.97231	0.97231
4	Blk4	0.459131	0.502774	0.807717	0.977036	0.572678	0.613127
5	Blk5	0.254265	0.292914	0.618252	0.977036	0.437716	0.486726
6	Blk6	0.763673	0.796877	0.406862	0.977036	0.73326	0.779258
7	Blk7	0.1873	0.221076	0.498966	0.977036	0.0651467	0.0902032
8	Blk8	0.753902	0.789541	0.536167	0.977036	0.425268	0.478426
9	Blk9	0.19826	0.23117	0.101948	0.764248	0.0117671	0.019415
10	Crude Ag ShCA	0.00822627	0.0128759	0.506832	0.977036	0.0269792	0.0415508
11	Crude Ag ShSEA	0.0204487	0.0292997	0.688716	0.977036	0.0389727	0.0566876
12	Crude Ag SmCA	3.62179e-06	2.67455e-05	0.708339	0.977036	9.96025e-07	1.10329e-05
13	Crude Ag SmSEA	2.32048e-06	2.02515e-05	0.801203	0.977036	8.78588e-07	1.10329e-05
14	NG-1_2uM_x000D_	0.640198	0.682878	0.109304	0.767791	0.433625	0.484046
15	NG-1_20uM_x000D_	0.533816	0.580147	0.514962	0.977036	0.257493	0.311588
16	NG-10_2uM_x000D_	0.040685	0.0527806	0.0816629	0.691733	0.453429	0.502259
17	NG-10_10uM_x000D_	0.00655413	0.0104866	0.690002	0.977036	0.00245021	0.00486663
18	NG-11_2uM_x000D_	0.000269965	0.00065336	0.159892	0.883999	0.00579367	0.0103638
19	NG-11_10uM_x000D_	3.80485e-07	5.47899e-06	0.744972	0.977036	6.66599e-07	9.59903e-06
20	NG-12_2uM_x000D_	2.41548e-06	2.04605e-05	0.257307	0.977036	3.66849e-05	0.00016008
21	NG-13_2uM_x000D_	0.901116	0.917036	0.317541	0.977036	0.51393	0.558535
22	NG-13_20uM_x000D_	0.00232637	0.00421381	0.0385462	0.570598	0.112526	0.149766
23	NG-15_2uM_x000D_	6.38502e-08	1.97242e-06	0.435667	0.977036	3.79058e-07	6.82304e-06
24	NG-2_2uM_x000D_	0.278101	0.317829	0.921589	0.990721	0.304711	0.361139
25	NG-2_20uM_x000D_	0.836977	0.860891	0.430699	0.977036	0.412148	0.471026
26	NG-3_2uM_x000D_	0.382719	0.425571	0.641576	0.977036	0.214274	0.265995
27	NG-3_20uM_x000D_	0.558111	0.604271	0.719874	0.977036	0.383681	0.443995
28	NG-4_2uM_x000D_	0.0115733	0.01792	0.444606	0.977036	0.0439513	0.0632899
29	NG-4_20uM_x000D_	0.0252778	0.0346667	0.473853	0.977036	0.00553468	0.0100251
30	NG-5_2uM_x000D_	0.0013323	0.00257518	0.468193	0.977036	0.00568458	0.0102322
31	NG-5_10uM_x000D_	5.81072e-05	0.000196881	0.954585	0.994317	3.99746e-05	0.000171831
32	NG-7_2uM_x000D_	0.173951	0.207016	0.628523	0.977036	0.0814495	0.110648
33	NG-7_10uM_x000D_	0.035527	0.0462976	0.590012	0.977036	0.0117973	0.019415
34	NG-8_2uM_x000D_	0.0203941	0.0292997	0.958856	0.994317	0.0205172	0.0324668
35	NG-8_6uM_x000D_	0.00109558	0.00214645	0.836469	0.977241	0.00149819	0.00312666
36	NG-9_2uM_x000D_	1.85547e-12	5.34374e-10	0.912069	0.990721	1.50942e-12	4.34712e-10
37	NG-A1_2uM	2.05427e-07	3.69768e-06	0.789514	0.977036	7.08984e-08	2.92934e-06
38	NG-A2_2uM	7.53354e-08	1.97242e-06	0.641683	0.977036	1.48346e-08	8.54473e-07
39	NG-A3_2uM	1.26615e-08	7.37167e-07	0.996386	0.996386	8.77838e-09	8.42725e-07
40	Oglyc_CA1_0.08uM	0.0237055	0.03299	0.241759	0.977036	0.152664	0.197163
41	Oglyc_CA2_0.602uM	5.58353e-07	7.33335e-06	0.416376	0.977036	3.67078e-06	3.20359e-05
42	Oglyc_CA3_1.04uM	0.000414274	0.000954488	0.718445	0.977036	0.000813795	0.00196952
43	Oglyc_SEA_1_0.18uM	6.29288e-05	0.000210738	0.412766	0.977036	0.000388668	0.00103645
44	Oglyc_SEA2_0.102uM	0.0224934	0.0319119	0.655698	0.977036	0.0461378	0.0655542
45	Shc_F07_02uM	0.835253	0.860891	0.27481	0.977036	0.521607	0.564747
46	Shc_F08_02uM	0.0633245	0.0799888	0.0907422	0.725938	0.00199691	0.00405008
47	Shc_F09_02uM	7.73999e-05	0.000244519	0.432314	0.977036	0.000436973	0.00115174
48	Shc_F10_02uM	0.000693161	0.00148978	0.761797	0.977036	0.000280683	0.000798933
49	Shc_F11_02uM	0.136959	0.165038	0.360719	0.977036	0.416349	0.473947
50	Shc_F12_02uM	0.106201	0.131836	0.992672	0.996131	0.102384	0.137788
51	Shc_F12_06uM	3.18287e-05	0.000122222	0.75029	0.977036	5.68115e-05	0.000224133
52	Shc_F01_02uM	0.853652	0.874918	0.204378	0.977036	0.24081	0.292629
53	Shc_F02_02uM	0.489355	0.533842	0.0568696	0.663126	0.422931	0.478426
54	Shc_F02_06uM	0.00687691	0.0109423	0.469731	0.977036	0.00123691	0.00269872
55	Shc_F03_02uM	0.175046	0.207463	0.795472	0.977036	0.237628	0.289987
56	Shc_F03_06uM	0.000152064	0.000409293	0.508384	0.977036	0.000622539	0.00154561
57	Shc_F04_02uM	0.94491	0.954856	0.821	0.977241	0.805774	0.834758
58	Shc_F05_02uM	0.000857943	0.00174005	0.382752	0.977036	0.00517826	0.00943886
59	Shc_F05_06uM	0.231462	0.267736	0.209274	0.977036	0.809296	0.835402
60	Shc_F06_02uM	0.12248	0.149468	0.0198595	0.463916	0.00112351	0.00248901
61	She_HFa_F01_02uM	0.0289348	0.0387592	0.388847	0.977036	0.113364	0.149766
62	She_HFa_F02_02uM	0.00269919	0.00474005	0.169515	0.90408	0.0381108	0.0560139
63	She_HFa_F02_06uM	0.00879176	0.0136866	0.0634664	0.663126	0.199712	0.251082
64	She_HFa_F02_10uM	0.000603501	0.00130683	0.194532	0.949578	0.00928208	0.0155421
65	She_HFa_F03_02uM	0.0213303	0.0304116	0.0352256	0.570598	0.465908	0.514106
66	She_HFa_F03_06uM	0.000544271	0.00120577	0.288676	0.977036	0.00512638	0.00943699
67	She_HFa_F04_02uM	0.0174492	0.0256985	0.116547	0.780597	0.213537	0.265995
68	She_HFa_F04_06uM	0.000264704	0.000646057	0.388193	0.977036	0.00169407	0.00348493
69	She_HFa_F04_10uM	0.000472763	0.00107209	0.408919	0.977036	0.00268498	0.00518976
70	She_HFa_F05_02uM	0.0174353	0.0256985	0.060147	0.663126	0.319006	0.376532
71	She_HFa_F06_02uM	1.2798e-08	7.37167e-07	0.00576595	0.463916	2.07876e-05	0.000103221
72	She_HFa_F06_06uM	0.000143817	0.00039447	0.176663	0.919833	0.00294014	0.00557079
73	She_HFa_F06_10uM	1.3775e-07	3.05169e-06	0.414865	0.977036	9.0807e-07	1.10329e-05
74	She_HFa_F06_20uM	4.75693e-06	3.11362e-05	0.265305	0.977036	6.75017e-05	0.000252474
75	She_HFa_F07_02uM	0.000930191	0.00187339	0.133173	0.833778	0.0202817	0.0322715
76	She_HFa_F08_02uM	2.93018e-06	2.34414e-05	0.160052	0.883999	9.01308e-05	0.000305384
77	She_HFn_F03_02uM	0.977768	0.977768	0.371751	0.977036	0.504917	0.550819
78	She_HFn_F04_02uM	0.377691	0.421609	0.769261	0.977036	0.502696	0.550481
79	She_HFn_F05_02uM	0.0287999	0.0387587	0.781998	0.977036	0.0156837	0.0252341
80	She_HFn_F05_06uM	0.079596	0.100103	0.337457	0.977036	0.0133031	0.0217687
81	She_HFn_F06_02uM	0.349049	0.39422	0.833152	0.977241	0.429891	0.481746
82	She_HFn_F06_06uM	0.042074	0.0540952	0.961587	0.994317	0.0358788	0.0541
83	She_HFn_F07_02uM	0.0191729	0.0277477	0.319893	0.977036	0.00216702	0.00433405
84	She_HFn_F08_02uM	0.00134516	0.00257527	0.178856	0.919833	4.12277e-05	0.000174611
85	She_HFn_F08_06uM	0.0118236	0.0182095	0.725382	0.977036	0.00514447	0.00943699
86	She_HFn_F09_02uM	0.0229989	0.032469	0.0656757	0.663126	0.360364	0.423612
87	She_HFn_F10_02uM	0.02354	0.03299	0.328183	0.977036	0.00287629	0.00552248
88	She_HFn_F11_02uM	0.23148	0.267736	0.0539471	0.663126	0.00806896	0.0138637
89	She_HFn_F12_02uM	0.00631848	0.010166	0.305195	0.977036	0.041249	0.059697
90	She_HFn_F12_06uM	4.42526e-05	0.000163134	0.711712	0.977036	9.00227e-05	0.000305384
91	She_HFn_F12_10uM	0.00204476	0.00382396	0.308106	0.977036	0.0153395	0.024819
92	She_HFn_F13_02uM	0.106857	0.132081	0.0776326	0.685716	0.789302	0.821024
93	She_HFn_F01_02uM	0.432099	0.476799	0.518088	0.977036	0.196337	0.248004
94	She_HFn_F02_02uM	0.157797	0.188571	0.386996	0.977036	0.0378956	0.0560139
95	She_HF_F01_02uM	0.94406	0.954856	0.263661	0.977036	0.423751	0.478426
96	She_HF_F01_06uM	0.189889	0.223217	0.0207005	0.463916	0.613704	0.654618
97	She_HF_F02_02uM	0.736645	0.774284	0.0359468	0.570598	0.0490194	0.0692038
98	She_HF_F03_02uM	0.785722	0.816924	0.479827	0.977036	0.784193	0.821024
99	She_A_F03_02uM	0.0238261	0.03299	0.0093761	0.463916	0.789665	0.821024
100	She_A_F03_06uM	0.00441656	0.00752645	0.139641	0.850733	0.0675924	0.0931417
101	She_A_F03_10uM	0.0315713	0.041901	0.0145313	0.463916	0.78073	0.820702
102	She_A_F04_02uM	0.1169	0.143264	0.36304	0.977036	0.367956	0.430778
103	She_A_F04_06uM	0.062913	0.0798192	0.519459	0.977036	0.159097	0.204554
104	She_A_F04_10uM	0.386701	0.428345	0.185235	0.929224	0.876165	0.888506
105	She_A_F04_20uM	4.87067e-05	0.000171068	0.00892258	0.463916	0.0192739	0.0308383
106	She_A_F04_60uM	3.11324e-06	2.42328e-05	0.300209	0.977036	3.64557e-05	0.00016008
107	She_A_F05_02uM	0.0350783	0.0459207	0.352214	0.977036	0.147009	0.191068
108	She_A_F05_06uM	0.0130871	0.0198374	0.329471	0.977036	0.0699464	0.0959265
109	She_A_F05_10uM	0.00217322	0.0039925	0.0133801	0.463916	0.200517	0.251082
110	She_A_F05_20uM	1.42573e-06	1.3687e-05	0.0282483	0.570598	0.000359518	0.000967674
111	She_A_F05_60uM	0.000212373	0.000546103	0.452885	0.977036	0.00105998	0.00238497
112	She_A_F06_02uM	1.12307e-07	2.69537e-06	0.23257	0.977036	2.08747e-06	2.07307e-05
113	She_A_F06_06uM	8.56646e-05	0.000256994	0.30928	0.977036	0.000839599	0.00201504
114	She_A_F06_10uM	0.000109025	0.000310883	0.452961	0.977036	0.000558914	0.00141199
115	She_A_F06_20uM	9.11048e-07	1.00916e-05	0.228853	0.977036	1.70404e-05	8.92299e-05
116	She_A_F06_60uM	3.40933e-05	0.000129196	0.454815	0.977036	0.000179843	0.000545209
117	She_A_F07_02uM	0.000798889	0.00167942	0.0705619	0.663126	0.0324577	0.0494593
118	She_A_F07_06uM	6.67476e-09	6.40777e-07	0.240804	0.977036	1.14395e-07	3.66064e-06
119	She_A_F07_10uM	3.60832e-08	1.29899e-06	0.642349	0.977036	8.95454e-08	3.22363e-06
120	She_A_F07_20uM	0.000260546	0.000641344	0.423734	0.977036	0.00144405	0.00305798
121	She_A_F01_02uM	0.0312012	0.0416016	0.0855083	0.703611	0.377075	0.439666
122	She_A_F02_02uM	0.00457724	0.00770903	0.0138193	0.463916	0.304483	0.361139
123	She_A_F02_06uM	0.000520306	0.00117069	0.0785716	0.685716	0.0210003	0.0330496
124	She_A_F02_10uM	0.0530093	0.0675517	0.030279	0.570598	0.779825	0.820702
125	She_N_F07_02uM	0.00624699	0.0101075	0.720151	0.977036	0.00254642	0.00498182
126	She_N_F07_06uM	0.114991	0.141528	0.323102	0.977036	0.396558	0.455769
127	She_N_F07_10uM	0.00056045	0.00123213	0.611687	0.977036	0.000135107	0.000413944
128	She_N_F07_20uM	7.73382e-06	4.73902e-05	0.879264	0.985324	3.94557e-06	3.24664e-05
129	She_N_F08_02uM	7.88606e-05	0.000244519	0.810804	0.977036	3.42127e-05	0.000156401
130	She_N_F08_06uM	0.000335748	0.000792584	0.536966	0.977036	5.92242e-05	0.000224429
131	She_N_F08_10uM	1.25294e-05	6.45837e-05	0.570907	0.977036	4.2418e-05	0.000177049
132	She_N_F09_02uM	0.602415	0.647372	0.0396249	0.570598	0.0345724	0.0524045
133	She_N_F09_06uM	0.0025893	0.00463178	0.551009	0.977036	0.00808718	0.0138637
134	She_N_F09_10uM	0.000107552	0.00030975	0.889239	0.988807	0.000123144	0.000386431
135	She_N_F09_20uM	1.68241e-05	7.5034e-05	0.671548	0.977036	4.24704e-06	3.39763e-05
136	She_N_F10_02uM	0.713667	0.75288	0.16268	0.883999	0.146464	0.191068
137	She_N_F10_06uM	0.00135023	0.00257527	0.00653581	0.463916	0.21712	0.268372
138	She_N_F10_10uM	6.11112e-07	7.33335e-06	0.0421307	0.577793	0.000106857	0.000357845
139	She_N_F10_20uM	4.43636e-06	2.97133e-05	0.516781	0.977036	1.86977e-05	9.44728e-05
140	She_N_F10_60uM	1.39231e-05	6.91352e-05	0.21686	0.977036	0.000257477	0.000749023
141	She_N_F11_02uM	0.0174892	0.0256985	0.0198323	0.463916	0.532532	0.574417
142	She_N_F11_06uM	0.000148784	0.000404243	0.513858	0.977036	0.000597261	0.00149575
143	She_N_F11_10uM	1.64799e-05	7.5034e-05	0.229322	0.977036	4.98788e-07	7.98061e-06
144	She_N_F11_20uM	0.00335917	0.00582795	0.510813	0.977036	0.000649947	0.00158631
145	She_N_F11_60uM	0.0061529	0.0100115	0.666229	0.977036	0.00212794	0.00428564
146	She_N_F12_02uM	1.13734e-05	6.42264e-05	0.0442672	0.579498	0.00145967	0.00306851
147	She_N_F13_02uM	9.87704e-07	1.05355e-05	0.427048	0.977036	6.1729e-06	4.67841e-05
148	She_N_F13_06uM	6.07538e-07	7.33335e-06	0.650287	0.977036	1.28651e-07	3.70514e-06
149	She_N_F13_10uM	8.70151e-05	0.000258354	0.678015	0.977036	2.40243e-05	0.000117271
150	She_N_F14_02uM	0.0119642	0.0183282	0.446128	0.977036	0.0450587	0.0645617
151	She_N_F15_02uM	0.00401636	0.0068852	0.650367	0.977036	0.00127531	0.00274097
152	She_N_F15_06uM	2.70303e-08	1.1121e-06	0.625742	0.977036	7.11991e-08	2.92934e-06
153	She_N_F01_02uM	0.615731	0.659221	0.936553	0.991645	0.567777	0.610149
154	She_N_F01_06uM	0.964669	0.971415	0.252562	0.977036	0.397215	0.455769
155	She_N_F01_10uM	0.00758812	0.011942	0.783366	0.977036	0.00376492	0.00699547
156	She_N_F02_02uM	0.0515414	0.065973	0.594905	0.977036	0.113349	0.149766
157	She_N_F03_02uM	0.443775	0.487814	0.0209407	0.463916	0.289617	0.348994
158	She_N_F04_02uM	0.00391288	0.00674797	0.500509	0.977036	0.0139051	0.0226253
159	She_N_F04_06uM	1.19793e-06	1.23215e-05	0.787841	0.977036	1.82849e-06	1.88074e-05
160	She_N_F04_10uM	1.17592e-05	6.43228e-05	0.925361	0.990721	7.07465e-06	5.09375e-05
161	She_N_F05_02uM	0.0976232	0.121712	0.394983	0.977036	0.299098	0.357429
162	She_N_F05_06uM	0.00108712	0.00214446	0.317141	0.977036	7.95552e-05	0.000276375
163	She_N_F06_02uM	0.12601	0.153126	0.733883	0.977036	0.0709166	0.0967962
164	She_UN_F01_02uM	0.268854	0.308486	0.187135	0.929224	0.923187	0.929643
165	She_UN_F02_02uM	0.0186075	0.0270654	0.00105523	0.303906	0.815017	0.835575
166	She_A_F08_06uM	0.000231193	0.000586467	0.0970043	0.75506	0.00876349	0.0148464
167	She_A_F08_10uM	8.15564e-06	4.79352e-05	0.0713781	0.663126	0.000648306	0.00158631
168	She_A_F08_20uM	4.53346e-05	0.000163205	0.0629766	0.663126	0.00339867	0.00639749
169	She_A_F08_60uM	0.00121988	0.00237382	0.0683456	0.663126	0.0462066	0.0655542
170	Shw_F01_2uM	0.0928666	0.116285	0.730775	0.977036	0.147281	0.191068
171	Shw_F02_2uM	0.351242	0.395147	0.580833	0.977036	0.171612	0.218692
172	Shw_F03_2uM	4.18536e-06	2.93996e-05	0.685696	0.977036	9.28013e-06	6.21553e-05
173	Smc_F01_02uM	0.363709	0.407581	0.129588	0.829364	0.0384397	0.056196
174	Smc_F02_02uM	3.0383e-05	0.000118247	0.969008	0.996131	2.64023e-05	0.000126731
175	Smc_F03_02uM	5.32772e-05	0.000182665	0.804383	0.977036	7.96496e-05	0.000276375
176	Smc_F04_02uM	6.48004e-05	0.000214512	0.731126	0.977036	0.000123443	0.000386431
177	Smc_F05_02uM	1.66885e-05	7.5034e-05	0.559121	0.977036	5.89497e-05	0.000224429
178	Smc_F06_02uM	3.85143e-06	2.77303e-05	0.833981	0.977241	5.08423e-06	3.95745e-05
179	Smc_F07_02uM	2.28573e-05	9.27171e-05	0.458645	0.977036	0.000119796	0.000386431
180	Smc_F07_06uM	2.07811e-05	8.67387e-05	0.438128	0.977036	0.000119026	0.000386431
181	Smc_F08_02uM	0.000117534	0.000328639	0.360844	0.977036	0.000886326	0.0021096
182	Smc_F08_06uM	2.6439e-07	4.23025e-06	0.803841	0.977036	3.73978e-07	6.82304e-06
183	Smc_F09_02uM	7.28885e-08	1.97242e-06	0.658987	0.977036	1.71502e-07	4.10978e-06
184	Smc_F10_02uM	1.68909e-07	3.47469e-06	0.735053	0.977036	3.03468e-07	6.24277e-06
185	Sme_HFa_F01_02uM	0.00239992	0.00431986	0.105099	0.764248	0.0540437	0.0759249
186	Sme_HFa_F01_06uM	0.0140006	0.0210009	0.123426	0.807878	0.175869	0.223129
187	Sme_HFa_F01_10uM	0.00217647	0.0039925	0.141789	0.850733	0.0381206	0.0560139
188	Sme_HFn_F01_02uM	0.131684	0.159348	0.0374936	0.570598	0.917349	0.927005
189	Sme_HFn_F01_20uM	0.866763	0.885205	0.26738	0.977036	0.487149	0.535493
190	Sme_HFn_F02_02uM	0.00495496	0.00820131	0.805051	0.977036	0.0025469	0.00498182
191	Sme_HFn_F02_06uM	0.149221	0.179065	0.724001	0.977036	0.231004	0.284312
192	Sme_HFn_F02_10uM	0.193157	0.226135	0.554804	0.977036	0.383871	0.443995
193	Sme_HFn_F03_02uM	0.0269578	0.036622	0.613546	0.977036	0.00925109	0.0155421
194	Sme_HFn_F04_02uM	0.00583953	0.00955559	0.474257	0.977036	0.00104741	0.00237524
195	Sme_HFn_F04_06uM	2.04954e-05	8.67387e-05	0.822571	0.977241	2.86392e-05	0.000135215
196	Sme_HFn_F04_10uM	0.00221879	0.00404437	0.587848	0.977036	0.00054445	0.00138762
197	Sme_HFn_F05_02uM	0.00203259	0.00382396	0.518318	0.977036	0.00714058	0.0126033
198	Sme_HFn_F06_02uM	0.0134469	0.020276	0.864475	0.985324	0.00860246	0.0146598
199	Sme_HFn_F07_02uM	9.05398e-05	0.000264116	0.283255	0.977036	0.00101072	0.00232871
200	Sme_HFn_F08_02uM	0.654613	0.695677	0.338406	0.977036	0.232903	0.28543
201	Sme_HFn_F09_02uM	0.0250409	0.0345062	0.802689	0.977036	0.0362294	0.0543441
202	Sme_HFn_F09_06uM	0.32719	0.372454	0.944534	0.994317	0.294549	0.353458
203	Sme_HFn_F10_02uM	0.574087	0.61924	0.657108	0.977036	0.820677	0.838138
204	Sme_HFn_F10_06uM	0.344067	0.390123	0.113994	0.780597	0.780807	0.820702
205	Sme_HFn_F11_02uM	0.041549	0.0536597	0.355137	0.977036	0.00640429	0.0113854
206	Sme_A_F01_02uM	7.98084e-05	0.000244519	0.413939	0.977036	7.59346e-06	5.33395e-05
207	Sme_A_F02_02uM	7.72966e-07	8.90457e-06	0.92501	0.990721	4.38448e-07	7.42783e-06
208	Sme_A_F02_06uM	2.44114e-05	9.76456e-05	0.8107	0.977036	3.55411e-05	0.000159935
209	Sme_A_F03_02uM	2.63718e-06	2.17003e-05	0.774039	0.977036	9.10296e-07	1.10329e-05
210	Sme_A_F03_06uM	1.95811e-05	8.41695e-05	0.77272	0.977036	3.23286e-05	0.000150172
211	Sme_A_F03_10uM	0.000829924	0.00170727	0.53476	0.977036	0.00289705	0.00552549
212	Sme_A_F04_02uM	0.00463523	0.00776131	0.146432	0.850952	0.000130882	0.000405311
213	Sme_A_F04_06uM	0.00263714	0.00468825	0.701246	0.977036	0.000953365	0.00221427
214	Sme_A_F04_10uM	3.19948e-07	4.84974e-06	0.607967	0.977036	9.31455e-07	1.10329e-05
215	Sme_A_F04_20uM	1.51171e-06	1.40442e-05	0.781795	0.977036	2.36328e-06	2.26874e-05
216	Sme_A_F05_02uM	0.000759323	0.0016134	0.546284	0.977036	0.0025601	0.00498182
217	Sme_A_F05_06uM	0.00447972	0.00758918	0.397149	0.977036	0.0219965	0.0340592
218	Sme_A_F05_10uM	0.028584	0.0386488	0.34818	0.977036	0.125897	0.165563
219	Sme_A_F06_02uM	0.017991	0.0263016	0.307261	0.977036	0.0979438	0.132431
220	Sme_A_F06_20uM	0.000286487	0.000687568	0.571079	0.977036	0.000919076	0.00216962
221	Sme_A_F07_02uM	4.90735e-06	3.14071e-05	0.917929	0.990721	2.82298e-06	2.62264e-05
222	Sme_A_F07_06uM	1.47842e-05	7.0964e-05	0.992495	0.996131	1.11673e-05	6.70039e-05
223	Sme_A_F08_02uM	5.99934e-06	3.75611e-05	0.899016	0.990721	3.25237e-06	2.92713e-05
224	Sme_A_F09_02uM	0.000824406	0.00170727	0.721926	0.977036	0.00158804	0.00329032
225	Sme_A_F09_06uM	0.00209881	0.00389972	0.507556	0.977036	0.00761894	0.0132985
226	Sme_A_F10_02uM	0.00478016	0.00795772	0.421492	0.977036	0.0214849	0.0335399
227	Sme_A_F10_06uM	0.000938281	0.00187656	0.492909	0.977036	0.00375423	0.00699547
228	Sme_A_F10_10uM	0.00537432	0.0088446	0.381539	0.977036	0.0272686	0.0417731
229	Sme_A_F11_02uM	0.0257726	0.0351778	0.3852	0.977036	0.103968	0.139269
230	Sme_N_F01_02uM	0.000761884	0.0016134	0.106146	0.764248	0.0215447	0.0335399
231	Sme_N_F02_02uM	0.000355102	0.000824753	0.561687	0.977036	6.91291e-05	0.000255246
232	Sme_N_F02_06uM	5.85465e-10	8.43069e-08	0.766058	0.977036	1.72424e-10	2.4829e-08
233	Sme_N_F03_02uM	2.39352e-07	4.05491e-06	0.977518	0.996131	1.85511e-07	4.10978e-06
234	Sme_N_F03_06uM	1.69348e-05	7.5034e-05	0.92418	0.990721	1.02364e-05	6.44788e-05
235	Sme_N_F04_02uM	0.000442802	0.00101212	0.692483	0.977036	0.00094321	0.00220849
236	Sme_N_F04_10uM	0.00315047	0.005499	0.622297	0.977036	0.00786357	0.0136428
237	Sme_N_F05_02uM	0.0151169	0.0225579	0.147735	0.850952	0.162661	0.208206
238	Sme_N_F05_60uM	0.000253852	0.000635733	0.732646	0.977036	0.000478801	0.0012312
239	Sme_N_F06_02uM	0.00269254	0.00474005	0.476121	0.977036	0.0106413	0.017715
240	Sme_N_F06_06uM	4.78322e-05	0.00017007	0.617331	0.977036	1.02987e-05	6.44788e-05
241	Sme_N_F06_10uM	2.15479e-05	8.86544e-05	0.739952	0.977036	7.01294e-06	5.09375e-05
242	Sme_N_F06_20uM	9.07899e-05	0.000264116	0.989385	0.996131	7.05549e-05	0.000257213
243	Sme_N_F07_02uM	0.023712	0.03299	0.600443	0.977036	0.0553553	0.0772846
244	Sme_N_F07_06uM	0.000826627	0.00170727	0.771496	0.977036	0.00137108	0.00292497
245	Sme_N_F07_10uM	0.0126644	0.0192981	0.531011	0.977036	0.0373324	0.0557084
246	Sme_N_F07_20uM	0.000528486	0.00117988	0.978483	0.996131	0.000471103	0.00122232
247	Sme_N_F07_60uM	0.000849678	0.00173551	0.876077	0.985324	0.00103352	0.00236234
248	Sme_N_F08_02uM	0.00717064	0.011347	0.464459	0.977036	0.00127088	0.00274097
249	Sme_N_F08_06uM	0.000138668	0.000384004	0.887898	0.988807	7.88464e-05	0.000276375
250	Sme_N_F08_10uM	0.000258498	0.000641344	0.822259	0.977241	0.000121667	0.000386431
251	Sme_N_F09_02uM	4.47485e-05	0.000163134	0.78291	0.977036	7.17291e-05	0.000258225
252	Sme_N_F09_06uM	8.47155e-05	0.000256822	0.913639	0.990721	5.15716e-05	0.000209192
253	Sme_N_F09_10uM	7.46137e-05	0.00024419	0.983505	0.996131	5.66581e-05	0.000224133
254	Sme_N_F10_02uM	1.68672e-05	7.5034e-05	0.230154	0.977036	0.000282956	0.000798933
255	Sme_N_F10_06uM	0.000232143	0.000586467	0.834119	0.977241	0.000113046	0.000374223
256	Sme_N_F11_02uM	0.000167614	0.00044287	0.760153	0.977036	0.000290027	0.00080315
257	Sme_N_F12_02uM	0.000185275	0.000485083	0.776167	0.977036	0.000304575	0.000835407
258	Sme_N_F13_02uM	0.000333811	0.000792584	0.961988	0.994317	0.000245673	0.000725818
259	Sme_N_F13_10uM	7.84904e-05	0.000244519	0.482383	0.977036	1.01238e-05	6.44788e-05
260	Sme_N_F14_02uM	2.39239e-08	1.1121e-06	0.932643	0.991148	1.31294e-08	8.54473e-07
261	Sme_N_F14_10uM	0.000344657	0.000807002	0.857981	0.985324	0.000439899	0.00115174
262	Sme_N_F15_02uM	0.677652	0.717513	0.649093	0.977036	0.94513	0.948423
263	Sme_N_F16_02uM	1.27471e-06	1.26592e-05	0.963245	0.994317	1.06705e-06	1.13819e-05
264	Sme_N_F16_10uM	1.42591e-05	6.96037e-05	0.842263	0.978111	1.85891e-05	9.44728e-05
265	Sme_N_F17_02uM	1.18372e-05	6.43228e-05	0.912594	0.990721	1.21844e-05	7.01821e-05
266	Sme_N_F17_06uM	0.00167777	0.00317893	0.462871	0.977036	0.00717685	0.0126033
267	Sme_N_F17_10uM	8.55426e-06	4.92726e-05	0.83812	0.977241	3.804e-06	3.22221e-05
268	Sme_N_F17_20uM	1.28828e-05	6.50921e-05	0.956353	0.994317	8.60977e-06	5.90384e-05
269	Sme_N_F18_02uM	3.37296e-06	2.55635e-05	0.581032	0.977036	1.10325e-05	6.70039e-05
270	Sme_N_F18_06uM	4.37746e-06	2.97133e-05	0.631212	0.977036	1.18454e-05	6.96219e-05
271	Sme_N_F18_10uM	5.23388e-05	0.000181609	0.47955	0.977036	0.00024698	0.000725818
272	Sme_N_F18_20uM	1.88661e-07	3.62229e-06	0.931944	0.991148	1.70262e-07	4.10978e-06
273	Sme_N_F19_02uM	7.97436e-05	0.000244519	0.675971	0.977036	0.000182703	0.00054811
274	Sme_N_F19_60uM	0.000945117	0.0018772	0.860341	0.985324	0.00120476	0.00264862
275	Sme_N_F20_02uM	0.000158064	0.000421503	0.379857	0.977036	0.00107889	0.00240868
276	Sme_N_F20_06uM	7.90146e-06	4.74087e-05	0.758021	0.977036	1.36332e-05	7.69872e-05
277	Sme_N_F20_10uM	0.000189607	0.000491952	0.75819	0.977036	0.000330065	0.00089678
278	Sme_N_F20_20uM	4.02199e-05	0.000150433	0.810673	0.977036	5.87898e-05	0.000224429
279	Sme_N_F21_02uM	0.000110803	0.000312855	0.651256	0.977036	0.000275253	0.000792728
280	Sme_N_F21_06uM	0.000582543	0.001271	0.573111	0.977036	0.00181434	0.00370589
281	Sme_N_F22_02uM	1.24245e-05	6.45837e-05	0.846436	0.97901	1.59481e-05	8.50563e-05
282	Sme_N_F23_02uM	7.85175e-05	0.000244519	0.541193	0.977036	0.000289674	0.00080315
283	Sme_N_F23_10uM	2.94721e-05	0.000116273	0.805172	0.977036	4.37698e-05	0.000180082
284	Sme_N_F24_02uM	1.95223e-06	1.75701e-05	0.879149	0.985324	9.64441e-07	1.10329e-05
285	Sme_N_F25_02uM	1.89854e-05	8.28454e-05	0.987684	0.996131	1.41881e-05	7.85804e-05
286	Smw_F01_2uM	0.0326808	0.0431747	0.727364	0.977036	0.0555483	0.0772846
287	Smw_F02_2uM	1.25579e-05	6.45837e-05	0.866995	0.985324	1.50526e-05	8.17952e-05
288	Smw_F03_2uM	5.69272e-07	7.33335e-06	0.871335	0.985324	6.43809e-07	9.59903e-06
