# Supplementary material for: Major human schistosome species express different glycans with immunological and diagnostic implications.
Source: Research Square preprint supplement (doi:10.21203/rs.3.rs-7103573/v1), 2025-07-30
Supplement: Supplementary file 6 [file 5e14a5d80375e938b20461f7.xlsx]

## Sheet: Overview
Overview of glycan array content
Shc = S. haematobium cercariae
She = S. haematobium eggs
Shw = S. haematobium adult worms
Smc = S. mansoni cercariae
Sme = S. mansoni eggs
Smw = S. mansoni adult worms
=> Click (+) symbol on the left to populate fraction list
=> See tab 2-8 for detailed fraction content (MALDI-TOF-MS data)
Fraction list	Parasite	Life-stage	Treated?	Acidic/Neutral	Concentration	Array ID#	Array Name
Negative control, blanks F = 9
Blk1	NA	NA	NA	NA	NA	1	Blk1
Blk2			NA	NA	NA	2	Blk2
Blk3			NA	NA	NA	3	Blk3
Blk4			NA	NA	NA	4	Blk4
Blk5			NA	NA	NA	5	Blk5
Blk6			NA	NA	NA	6	Blk6
Blk7			NA	NA	NA	7	Blk7
Blk8			NA	NA	NA	8	Blk8
Blk9			NA	NA	NA	9	Blk9
Crude antigens, F = 4
Crude Ag ShCA	S. haematobium	Cercariae	Native	-	100ug/mL	10	Crude Ag ShCA
Crude Ag ShSEA	S. haematobium	Eggs	Native	-	100ug/mL	11	Crude Ag ShSEA
Crude Ag SmCA	S. mansoni	Cercariae	Native	-	100ug/mL	12	Crude Ag SmCA
Crude Ag SmSEA	S. mansoni	Eggs	Native	-	100ug/mL	13	Crude Ag SmSEA
N-glycans, F = 26
NG-1			Native	-	2mM	14	NG-1_2uM_x000D_
			Native	-	20mM	15	NG-1_20uM_x000D_
NG-10			Native	-	2mM	16	NG-10_2uM_x000D_
			Native	-	10mM	17	NG-10_10uM_x000D_
NG-11			Native	-	2mM	18	NG-11_2uM_x000D_
			Native	-	10mM	19	NG-11_10uM_x000D_
NG-12			Native	-	2mM	20	NG-12_2uM_x000D_
NG-13			Native	-	2mM	21	NG-13_2uM_x000D_
			Native	-	20mM	22	NG-13_20uM_x000D_
NG-15			Native	-	2mM	23	NG-15_2uM_x000D_
NG-2			Native	-	2mM	24	NG-2_2uM_x000D_
			Native	-	20mM	25	NG-2_20uM_x000D_
NG-3			Native	-	2mM	26	NG-3_2uM_x000D_
			Native	-	20mM	27	NG-3_20uM_x000D_
NG-4			Native	-	2mM	28	NG-4_2uM_x000D_
			Native	-	20mM	29	NG-4_20uM_x000D_
NG-5			Native	-	2mM	30	NG-5_2uM_x000D_
			Native	-	10mM	31	NG-5_10uM_x000D_
NG-7			Native	-	2mM	32	NG-7_2uM_x000D_
			Native	-	10mM	33	NG-7_10uM_x000D_
NG-8			Native	-	2mM	34	NG-8_2uM_x000D_
			Native	-	6mM	35	NG-8_6uM_x000D_
NG-9			Native	-	2mM	36	NG-9_2uM_x000D_
NG-A1			Native	-	2mM	37	NG-A1_2uM
NG-A2			Native	-	2mM	38	NG-A2_2uM
NG-A3			Native	-	2mM	39	NG-A3_2uM
O-glycans, F = 5
Oglyc_CA1	S. mansoni	Cercariae	Native	-	0.08mM	40	Oglyc_CA1_0.08uM
Oglyc_CA2	S. mansoni	Cercariae	Native	-	0.62mM	41	Oglyc_CA2_0.602uM
Oglyc_CA3	S. mansoni	Cercariae	Native	-	1.04mM	42	Oglyc_CA3_1.04uM
Oglyc_SEA_1	S. mansoni	Eggs	Native	-	0.18mM	43	Oglyc_SEA_1_0.18uM
Oglyc_SEA_2	S. mansoni	Eggs	Native	-	0.12mM	44	Oglyc_SEA2_0.102uM
GSL glycans, F = 244
Sh cercariae, F = 16
Shc_F01	S. haematobium	Cercariae	Native	-	2mM	52	Shc_F01_02uM
Shc_F02	S. haematobium	Cercariae	Native	-	2mM	53	Shc_F02_02uM
Shc_F02	S. haematobium	Cercariae	Native	-	6mM	54	Shc_F02_06uM
Shc_F03	S. haematobium	Cercariae	Native	-	2mM	55	Shc_F03_02uM
Shc_F03	S. haematobium	Cercariae	Native	-	6mM	56	Shc_F03_06uM
Shc_F04	S. haematobium	Cercariae	Native	-	2mM	57	Shc_F04_02uM
Shc_F05	S. haematobium	Cercariae	Native	-	2mM	58	Shc_F05_02uM
Shc_F05	S. haematobium	Cercariae	Native	-	6mM	59	Shc_F05_06uM
Shc_F06	S. haematobium	Cercariae	Native	-	2mM	60	Shc_F06_02uM
Shc_F07	S. haematobium	Cercariae	Native	-	2mM	45	Shc_F07_02uM
Shc_F08	S. haematobium	Cercariae	Native	-	2mM	46	Shc_F08_02uM
Shc_F09	S. haematobium	Cercariae	Native	-	2mM	47	Shc_F09_02uM
Shc_F10	S. haematobium	Cercariae	Native	-	2mM	48	Shc_F10_02uM
Shc_F11	S. haematobium	Cercariae	Native	-	2mM	49	Shc_F11_02uM
Shc_F12	S. haematobium	Cercariae	Native	-	2mM	50	Shc_F12_02uM
Shc_F12	S. haematobium	Cercariae	Native	-	6mM	51	Shc_F12_06uM
Sh eggs, F = 109
Sh eggs + HF, F = 38
She_HFa_F01	S. haematobium	Eggs	HF	Acidic	2mM	61	She_HFa_F01_02uM
She_HFa_F02	S. haematobium	Eggs	HF	Acidic	2mM	62	She_HFa_F02_02uM
	S. haematobium	Eggs	HF	Acidic	6mM	63	She_HFa_F02_06uM
	S. haematobium	Eggs	HF	Acidic	10mM	64	She_HFa_F02_10uM
She_HFa_F03	S. haematobium	Eggs	HF	Acidic	2mM	65	She_HFa_F03_02uM
	S. haematobium	Eggs	HF	Acidic	6mM	66	She_HFa_F03_06uM
She_HFa_F04	S. haematobium	Eggs	HF	Acidic	2mM	67	She_HFa_F04_02uM
	S. haematobium	Eggs	HF	Acidic	6mM	68	She_HFa_F04_06uM
	S. haematobium	Eggs	HF	Acidic	10mM	69	She_HFa_F04_10uM
She_HFa_F05	S. haematobium	Eggs	HF	Acidic	2mM	70	She_HFa_F05_02uM
She_HFa_F06	S. haematobium	Eggs	HF	Acidic	2mM	71	She_HFa_F06_02uM
	S. haematobium	Eggs	HF	Acidic	6mM	72	She_HFa_F06_06uM
	S. haematobium	Eggs	HF	Acidic	10mM	73	She_HFa_F06_10uM
	S. haematobium	Eggs	HF	Acidic	20mM	74	She_HFa_F06_20uM
She_HFa_F07	S. haematobium	Eggs	HF	Acidic	2mM	75	She_HFa_F07_02uM
She_HFa_F08	S. haematobium	Eggs	HF	Acidic	2mM	76	She_HFa_F08_02uM
She_HFn_F03	S. haematobium	Eggs	HF	Neutral	2mM	77	She_HFn_F03_02uM
She_HFn_F04	S. haematobium	Eggs	HF	Neutral	2mM	78	She_HFn_F04_02uM
She_HFn_F05	S. haematobium	Eggs	HF	Neutral	2mM	79	She_HFn_F05_02uM
She_HFn_F05	S. haematobium	Eggs	HF	Neutral	6mM	80	She_HFn_F05_06uM
She_HFn_F06	S. haematobium	Eggs	HF	Neutral	2mM	81	She_HFn_F06_02uM
She_HFn_F06	S. haematobium	Eggs	HF	Neutral	6mM	82	She_HFn_F06_06uM
She_HFn_F07	S. haematobium	Eggs	HF	Neutral	2mM	83	She_HFn_F07_02uM
She_HFn_F08	S. haematobium	Eggs	HF	Neutral	2mM	84	She_HFn_F08_02uM
She_HFn_F08	S. haematobium	Eggs	HF	Neutral	6mM	85	She_HFn_F08_06uM
She_HFn_F09	S. haematobium	Eggs	HF	Neutral	2mM	86	She_HFn_F09_02uM
She_HFn_F10	S. haematobium	Eggs	HF	Neutral	2mM	87	She_HFn_F10_02uM
She_HFn_F11	S. haematobium	Eggs	HF	Neutral	2mM	88	She_HFn_F11_02uM
She_HFn_F12	S. haematobium	Eggs	HF	Neutral	2mM	89	She_HFn_F12_02uM
She_HFn_F12	S. haematobium	Eggs	HF	Neutral	6mM	90	She_HFn_F12_06uM
She_HFn_F12	S. haematobium	Eggs	HF	Neutral	10mM	91	She_HFn_F12_10uM
She_HFn_F13	S. haematobium	Eggs	HF	Neutral	2mM	92	She_HFn_F13_02uM
She_HFn_F01	S. haematobium	Eggs	HF	Neutral	2mM	93	She_HFn_F01_02uM
She_HFn_F02	S. haematobium	Eggs	HF	Neutral	2mM	94	She_HFn_F02_02uM
She_HF_F01	S. haematobium	Eggs	HF	-	2mM	95	She_HF_F01_02uM
	S. haematobium	Eggs	HF	-	6mM	96	She_HF_F01_06uM
She_HF_F02	S. haematobium	Eggs	HF	-	2mM	97	She_HF_F02_02uM
She_HF_F03	S. haematobium	Eggs	HF	-	2mM	98	She_HF_F03_02uM
Sh eggs - native, F = 71
She_A_F01	S. haematobium	Eggs	Native	Acidic	2mM	121	She_A_F01_02uM
She_A_F02	S. haematobium	Eggs	Native	Acidic	2mM	122	She_A_F02_02uM
	S. haematobium	Eggs	Native	Acidic	6mM	123	She_A_F02_06uM
	S. haematobium	Eggs	Native	Acidic	10mM	124	She_A_F02_10uM
She_A_F03	S. haematobium	Eggs	Native	Acidic	2mM	99	She_A_F03_02uM
	S. haematobium	Eggs	Native	Acidic	6mM	100	She_A_F03_06uM
	S. haematobium	Eggs	Native	Acidic	10mM	101	She_A_F03_10uM
She_A_F04	S. haematobium	Eggs	Native	Acidic	2mM	102	She_A_F04_02uM
	S. haematobium	Eggs	Native	Acidic	6mM	103	She_A_F04_06uM
	S. haematobium	Eggs	Native	Acidic	10mM	104	She_A_F04_10uM
	S. haematobium	Eggs	Native	Acidic	20mM	105	She_A_F04_20uM
	S. haematobium	Eggs	Native	Acidic	60mM	106	She_A_F04_60uM
She_A_F05	S. haematobium	Eggs	Native	Acidic	2mM	107	She_A_F05_02uM
	S. haematobium	Eggs	Native	Acidic	6mM	108	She_A_F05_06uM
	S. haematobium	Eggs	Native	Acidic	10mM	109	She_A_F05_10uM
	S. haematobium	Eggs	Native	Acidic	20mM	110	She_A_F05_20uM
	S. haematobium	Eggs	Native	Acidic	60mM	111	She_A_F05_60uM
She_A_F06	S. haematobium	Eggs	Native	Acidic	2mM	112	She_A_F06_02uM
	S. haematobium	Eggs	Native	Acidic	6mM	113	She_A_F06_06uM
	S. haematobium	Eggs	Native	Acidic	10mM	114	She_A_F06_10uM
	S. haematobium	Eggs	Native	Acidic	20mM	115	She_A_F06_20uM
	S. haematobium	Eggs	Native	Acidic	60mM	116	She_A_F06_60uM
She_A_F07	S. haematobium	Eggs	Native	Acidic	2mM	117	She_A_F07_02uM
	S. haematobium	Eggs	Native	Acidic	6mM	118	She_A_F07_06uM
	S. haematobium	Eggs	Native	Acidic	10mM	119	She_A_F07_10uM
	S. haematobium	Eggs	Native	Acidic	20mM	120	She_A_F07_20uM
She_A_F08	S. haematobium	Eggs	Native	Acidic	6mM	166	She_A_F08_06uM
	S. haematobium	Eggs	Native	Acidic	10mM	167	She_A_F08_10uM
	S. haematobium	Eggs	Native	Acidic	20mM	168	She_A_F08_20uM
	S. haematobium	Eggs	Native	Acidic	60mM	169	She_A_F08_60uM
She_N_F01	S. haematobium	Eggs	Native	Neutral	2mM	153	She_N_F01_02uM
	S. haematobium	Eggs	Native	Neutral	6mM	154	She_N_F01_06uM
	S. haematobium	Eggs	Native	Neutral	10mM	155	She_N_F01_10uM
She_N_F02	S. haematobium	Eggs	Native	Neutral	2mM	156	She_N_F02_02uM
She_N_F03	S. haematobium	Eggs	Native	Neutral	2mM	157	She_N_F03_02uM
She_N_F04	S. haematobium	Eggs	Native	Neutral	2mM	158	She_N_F04_02uM
	S. haematobium	Eggs	Native	Neutral	6mM	159	She_N_F04_06uM
	S. haematobium	Eggs	Native	Neutral	10mM	160	She_N_F04_10uM
She_N_F05	S. haematobium	Eggs	Native	Neutral	2mM	161	She_N_F05_02uM
	S. haematobium	Eggs	Native	Neutral	6mM	162	She_N_F05_06uM
She_N_F06	S. haematobium	Eggs	Native	Neutral	2mM	163	She_N_F06_02uM
She_N_F07	S. haematobium	Eggs	Native	Neutral	2mM	125	She_N_F07_02uM
	S. haematobium	Eggs	Native	Neutral	6mM	126	She_N_F07_06uM
	S. haematobium	Eggs	Native	Neutral	10mM	127	She_N_F07_10uM
	S. haematobium	Eggs	Native	Neutral	20mM	128	She_N_F07_20uM
She_N_F08	S. haematobium	Eggs	Native	Neutral	2mM	129	She_N_F08_02uM
	S. haematobium	Eggs	Native	Neutral	6mM	130	She_N_F08_06uM
	S. haematobium	Eggs	Native	Neutral	10mM	131	She_N_F08_10uM
She_N_F09	S. haematobium	Eggs	Native	Neutral	2mM	132	She_N_F09_02uM
	S. haematobium	Eggs	Native	Neutral	6mM	133	She_N_F09_06uM
	S. haematobium	Eggs	Native	Neutral	10mM	134	She_N_F09_10uM
	S. haematobium	Eggs	Native	Neutral	20mM	135	She_N_F09_20uM
She_N_F10	S. haematobium	Eggs	Native	Neutral	2mM	136	She_N_F10_02uM
	S. haematobium	Eggs	Native	Neutral	6mM	137	She_N_F10_06uM
	S. haematobium	Eggs	Native	Neutral	10mM	138	She_N_F10_10uM
	S. haematobium	Eggs	Native	Neutral	20mM	139	She_N_F10_20uM
	S. haematobium	Eggs	Native	Neutral	60mM	140	She_N_F10_60uM
She_N_F11	S. haematobium	Eggs	Native	Neutral	2mM	141	She_N_F11_02uM
	S. haematobium	Eggs	Native	Neutral	6mM	142	She_N_F11_06uM
	S. haematobium	Eggs	Native	Neutral	10mM	143	She_N_F11_10uM
	S. haematobium	Eggs	Native	Neutral	20mM	144	She_N_F11_20uM
	S. haematobium	Eggs	Native	Neutral	60mM	145	She_N_F11_60uM
She_N_F12	S. haematobium	Eggs	Native	Neutral	2mM	146	She_N_F12_02uM
She_N_F13	S. haematobium	Eggs	Native	Neutral	2mM	147	She_N_F13_02uM
	S. haematobium	Eggs	Native	Neutral	6mM	148	She_N_F13_06uM
	S. haematobium	Eggs	Native	Neutral	10mM	149	She_N_F13_10uM
She_N_F14	S. haematobium	Eggs	Native	Neutral	2mM	150	She_N_F14_02uM
She_N_F15	S. haematobium	Eggs	Native	Neutral	2mM	151	She_N_F15_02uM
	S. haematobium	Eggs	Native	Neutral	6mM	152	She_N_F15_06uM
She_UN_F01	S. haematobium	Eggs	Native	-	2mM	164	She_UN_F01_02uM
She_UN_F02	S. haematobium	Eggs	Native	Acidic	2mM	165	She_UN_F02_02uM
Sh worms, F = 3
Sh-worms	S. haematobium	Worms	Native	-		170	Shw_F01_2uM
Sh-worms	S. haematobium	Worms	Native	-		171	Shw_F02_2uM
Sh-worms	S. haematobium	Worms	Native	-		172	Shw_F03_2uM
Sm cercariae, F = 12
Smc_F01	S. mansoni	Cercariae	Native	-	2mM	173	Smc_F01_02uM
Smc_F02	S. mansoni	Cercariae	Native	-	2mM	174	Smc_F02_02uM
Smc_F03	S. mansoni	Cercariae	Native	-	2mM	175	Smc_F03_02uM
Smc_F04	S. mansoni	Cercariae	Native	-	2mM	176	Smc_F04_02uM
Smc_F05	S. mansoni	Cercariae	Native	-	2mM	177	Smc_F05_02uM
Smc_F06	S. mansoni	Cercariae	Native	-	2mM	178	Smc_F06_02uM
Smc_F07	S. mansoni	Cercariae	Native	-	2mM	179	Smc_F07_02uM
	S. mansoni	Cercariae	Native	-	6mM	180	Smc_F07_06uM
Smc_F08	S. mansoni	Cercariae	Native	-	2mM	181	Smc_F08_02uM
	S. mansoni	Cercariae	Native	-	6mM	182	Smc_F08_06uM
Smc_F09	S. mansoni	Cercariae	Native	-	2mM	183	Smc_F09_02uM
Smc_F10	S. mansoni	Cercariae	Native	-	2mM	184	Smc_F10_02uM
Sm eggs, F = 101
Sm eggs + HF, F = 21
Sme_HFa_F01	S. mansoni	Eggs	HF	Acidic	2mM	185	Sme_HFa_F01_02uM
	S. mansoni	Eggs	HF	Acidic	6mM	186	Sme_HFa_F01_06uM
	S. mansoni	Eggs	HF	Acidic	10mM	187	Sme_HFa_F01_10uM
Sme_HFn_F01	S. mansoni	Eggs	HF	Neutral	2mM	188	Sme_HFn_F01_02uM
	S. mansoni	Eggs	HF	Neutral	20mM	189	Sme_HFn_F01_20uM
Sme_HFn_F02	S. mansoni	Eggs	HF	Neutral	2mM	190	Sme_HFn_F02_02uM
	S. mansoni	Eggs	HF	Neutral	6mM	191	Sme_HFn_F02_06uM
	S. mansoni	Eggs	HF	Neutral	10mM	192	Sme_HFn_F02_10uM
Sme_HFn_F03	S. mansoni	Eggs	HF	Neutral	2mM	193	Sme_HFn_F03_02uM
Sme_HFn_F04	S. mansoni	Eggs	HF	Neutral	2mM	194	Sme_HFn_F04_02uM
	S. mansoni	Eggs	HF	Neutral	6mM	195	Sme_HFn_F04_06uM
	S. mansoni	Eggs	HF	Neutral	10mM	196	Sme_HFn_F04_10uM
Sme_HFn_F05	S. mansoni	Eggs	HF	Neutral	2mM	197	Sme_HFn_F05_02uM
Sme_HFn_F06	S. mansoni	Eggs	HF	Neutral	2mM	198	Sme_HFn_F06_02uM
Sme_HFn_F07	S. mansoni	Eggs	HF	Neutral	2mM	199	Sme_HFn_F07_02uM
Sme_HFn_F08	S. mansoni	Eggs	HF	Neutral	2mM	200	Sme_HFn_F08_02uM
Sme_HFn_F09	S. mansoni	Eggs	HF	Neutral	2mM	201	Sme_HFn_F09_02uM
	S. mansoni	Eggs	HF	Neutral	6mM	202	Sme_HFn_F09_06uM
Sme_HFn_F10	S. mansoni	Eggs	HF	Neutral	2mM	203	Sme_HFn_F10_02uM
	S. mansoni	Eggs	HF	Neutral	6mM	204	Sme_HFn_F10_06uM
Sme_HFn_F11	S. mansoni	Eggs	HF	Neutral	2mM	205	Sme_HFn_F11_02uM
Sm eggs - native, F = 80
Sme_A_F01	S. mansoni	Eggs	Native	Acidic	2mM	206	Sme_A_F01_02uM										_	02uM
Sme_A_F02	S. mansoni	Eggs	Native	Acidic	2mM	207	Sme_A_F02_02uM										_	02uM
	S. mansoni	Eggs	Native	Acidic	6mM	208	Sme_A_F02_06uM										_	06uM
Sme_A_F03	S. mansoni	Eggs	Native	Acidic	2mM	209	Sme_A_F03_02uM										_	02uM
	S. mansoni	Eggs	Native	Acidic	6mM	210	Sme_A_F03_06uM										_	06uM
	S. mansoni	Eggs	Native	Acidic	10mM	211	Sme_A_F03_10uM										_	10uM
Sme_A_F04	S. mansoni	Eggs	Native	Acidic	2mM	212	Sme_A_F04_02uM										_	02uM
	S. mansoni	Eggs	Native	Acidic	6mM	213	Sme_A_F04_06uM										_	06uM
	S. mansoni	Eggs	Native	Acidic	10mM	214	Sme_A_F04_10uM										_	10uM
	S. mansoni	Eggs	Native	Acidic	20mM	215	Sme_A_F04_20uM										_	20uM
Sme_A_F05	S. mansoni	Eggs	Native	Acidic	2mM	216	Sme_A_F05_02uM										_	02uM
	S. mansoni	Eggs	Native	Acidic	6mM	217	Sme_A_F05_06uM										_	06uM
	S. mansoni	Eggs	Native	Acidic	10mM	218	Sme_A_F05_10uM										_	10uM
Sme_A_F06	S. mansoni	Eggs	Native	Acidic	2mM	219	Sme_A_F06_02uM										_	02uM
	S. mansoni	Eggs	Native	Acidic	20mM	220	Sme_A_F06_20uM										_	20uM
Sme_A_F07	S. mansoni	Eggs	Native	Acidic	2mM	221	Sme_A_F07_02uM										_	02uM
	S. mansoni	Eggs	Native	Acidic	6mM	222	Sme_A_F07_06uM										_	06uM
Sme_A_F08	S. mansoni	Eggs	Native	Acidic	2mM	223	Sme_A_F08_02uM										_	02uM
Sme_A_F09	S. mansoni	Eggs	Native	Acidic	2mM	224	Sme_A_F09_02uM										_	02uM
	S. mansoni	Eggs	Native	Acidic	6mM	225	Sme_A_F09_06uM										_	06uM
Sme_A_F10	S. mansoni	Eggs	Native	Acidic	2mM	226	Sme_A_F10_02uM										_	02uM
	S. mansoni	Eggs	Native	Acidic	6mM	227	Sme_A_F10_06uM										_	06uM
	S. mansoni	Eggs	Native	Acidic	10mM	228	Sme_A_F10_10uM										_	10uM
Sme_A_F11	S. mansoni	Eggs	Native	Acidic	2mM	229	Sme_A_F11_02uM										_	02uM
Sme_N_F01	S. mansoni	Eggs	Native	Neutral	2mM	230	Sme_N_F01_02uM									Sme_N_F01	_	02uM
Sme_N_F02	S. mansoni	Eggs	Native	Neutral	2mM	231	Sme_N_F02_02uM									Sme_N_F02	_	02uM
	S. mansoni	Eggs	Native	Neutral	6mM	232	Sme_N_F02_06uM									Sme_N_F02	_	06uM
Sme_N_F03	S. mansoni	Eggs	Native	Neutral	2mM	233	Sme_N_F03_02uM									Sme_N_F03	_	02uM
	S. mansoni	Eggs	Native	Neutral	6mM	234	Sme_N_F03_06uM									Sme_N_F03	_	06uM
Sme_N_F04	S. mansoni	Eggs	Native	Neutral	2mM	235	Sme_N_F04_02uM									Sme_N_F04	_	02uM
	S. mansoni	Eggs	Native	Neutral	10mM	236	Sme_N_F04_10uM									Sme_N_F04	_	10uM
Sme_N_F05	S. mansoni	Eggs	Native	Neutral	2mM	237	Sme_N_F05_02uM									Sme_N_F05	_	02uM
	S. mansoni	Eggs	Native	Neutral	60mM	238	Sme_N_F05_60uM									Sme_N_F05	_	60uM
Sme_N_F06	S. mansoni	Eggs	Native	Neutral	2mM	239	Sme_N_F06_02uM									Sme_N_F06	_	02uM
	S. mansoni	Eggs	Native	Neutral	6mM	240	Sme_N_F06_06uM									Sme_N_F06	_	06uM
	S. mansoni	Eggs	Native	Neutral	10mM	241	Sme_N_F06_10uM									Sme_N_F06	_	10uM
	S. mansoni	Eggs	Native	Neutral	20mM	242	Sme_N_F06_20uM									Sme_N_F06	_	20uM
Sme_N_F07	S. mansoni	Eggs	Native	Neutral	2mM	243	Sme_N_F07_02uM									Sme_N_F07	_	02uM
	S. mansoni	Eggs	Native	Neutral	6mM	244	Sme_N_F07_06uM									Sme_N_F07	_	06uM
	S. mansoni	Eggs	Native	Neutral	10mM	245	Sme_N_F07_10uM									Sme_N_F07	_	10uM
	S. mansoni	Eggs	Native	Neutral	20mM	246	Sme_N_F07_20uM									Sme_N_F07	_	20uM
	S. mansoni	Eggs	Native	Neutral	60mM	247	Sme_N_F07_60uM									Sme_N_F07	_	60uM
Sme_N_F08	S. mansoni	Eggs	Native	Neutral	2mM	248	Sme_N_F08_02uM									Sme_N_F08	_	02uM
	S. mansoni	Eggs	Native	Neutral	6mM	249	Sme_N_F08_06uM									Sme_N_F08	_	06uM
	S. mansoni	Eggs	Native	Neutral	10mM	250	Sme_N_F08_10uM									Sme_N_F08	_	10uM
Sme_N_F09	S. mansoni	Eggs	Native	Neutral	2mM	251	Sme_N_F09_02uM									Sme_N_F09	_	02uM
	S. mansoni	Eggs	Native	Neutral	6mM	252	Sme_N_F09_06uM									Sme_N_F09	_	06uM
	S. mansoni	Eggs	Native	Neutral	10mM	253	Sme_N_F09_10uM									Sme_N_F09	_	10uM
Sme_N_F10	S. mansoni	Eggs	Native	Neutral	2mM	254	Sme_N_F10_02uM									Sme_N_F10	_	02uM
	S. mansoni	Eggs	Native	Neutral	6mM	255	Sme_N_F10_06uM									Sme_N_F10	_	06uM
Sme_N_F11	S. mansoni	Eggs	Native	Neutral	2mM	256	Sme_N_F11_02uM									Sme_N_F11	_	02uM
Sme_N_F12	S. mansoni	Eggs	Native	Neutral	2mM	257	Sme_N_F12_02uM									Sme_N_F12	_	02uM
Sme_N_F13	S. mansoni	Eggs	Native	Neutral	2mM	258	Sme_N_F13_02uM									Sme_N_F13	_	02uM
	S. mansoni	Eggs	Native	Neutral	10mM	259	Sme_N_F13_10uM									Sme_N_F13	_	10uM
Sme_N_F14	S. mansoni	Eggs	Native	Neutral	2mM	260	Sme_N_F14_02uM									Sme_N_F14	_	02uM
	S. mansoni	Eggs	Native	Neutral	10mM	261	Sme_N_F14_10uM									Sme_N_F14	_	10uM
Sme_N_F15	S. mansoni	Eggs	Native	Neutral	2mM	262	Sme_N_F15_02uM									Sme_N_F15	_	02uM
Sme_N_F16	S. mansoni	Eggs	Native	Neutral	2mM	263	Sme_N_F16_02uM									Sme_N_F16	_	02uM
	S. mansoni	Eggs	Native	Neutral	10mM	264	Sme_N_F16_10uM									Sme_N_F16	_	10uM
Sme_N_F17	S. mansoni	Eggs	Native	Neutral	2mM	265	Sme_N_F17_02uM									Sme_N_F17	_	02uM
	S. mansoni	Eggs	Native	Neutral	6mM	266	Sme_N_F17_06uM									Sme_N_F17	_	06uM
	S. mansoni	Eggs	Native	Neutral	10mM	267	Sme_N_F17_10uM									Sme_N_F17	_	10uM
	S. mansoni	Eggs	Native	Neutral	20mM	268	Sme_N_F17_20uM									Sme_N_F17	_	20uM
Sme_N_F18	S. mansoni	Eggs	Native	Neutral	2mM	269	Sme_N_F18_02uM									Sme_N_F18	_	02uM
	S. mansoni	Eggs	Native	Neutral	6mM	270	Sme_N_F18_06uM									Sme_N_F18	_	06uM
	S. mansoni	Eggs	Native	Neutral	10mM	271	Sme_N_F18_10uM									Sme_N_F18	_	10uM
	S. mansoni	Eggs	Native	Neutral	20mM	272	Sme_N_F18_20uM									Sme_N_F18	_	20uM
Sme_N_F19	S. mansoni	Eggs	Native	Neutral	2mM	273	Sme_N_F19_02uM									Sme_N_F19	_	02uM
	S. mansoni	Eggs	Native	Neutral	60mM	274	Sme_N_F19_60uM									Sme_N_F19	_	60uM
Sme_N_F20	S. mansoni	Eggs	Native	Neutral	2mM	275	Sme_N_F20_02uM									Sme_N_F20	_	02uM
	S. mansoni	Eggs	Native	Neutral	6mM	276	Sme_N_F20_06uM									Sme_N_F20	_	06uM
	S. mansoni	Eggs	Native	Neutral	10mM	277	Sme_N_F20_10uM									Sme_N_F20	_	10uM
	S. mansoni	Eggs	Native	Neutral	20mM	278	Sme_N_F20_20uM									Sme_N_F20	_	20uM
Sme_N_F21	S. mansoni	Eggs	Native	Neutral	2mM	279	Sme_N_F21_02uM									Sme_N_F21	_	02uM
	S. mansoni	Eggs	Native	Neutral	6mM	280	Sme_N_F21_06uM									Sme_N_F21	_	06uM
Sme_N_F22	S. mansoni	Eggs	Native	Neutral	2mM	281	Sme_N_F22_02uM									Sme_N_F22	_	02uM
Sme_N_F23	S. mansoni	Eggs	Native	Neutral	2mM	282	Sme_N_F23_02uM									Sme_N_F23	_	02uM
	S. mansoni	Eggs	Native	Neutral	10mM	283	Sme_N_F23_10uM									Sme_N_F23	_	10uM
Sme_N_F24	S. mansoni	Eggs	Native	Neutral	2mM	284	Sme_N_F24_02uM									Sme_N_F24	_	02uM
Sme_N_F25	S. mansoni	Eggs	Native	Neutral	2mM	285	Sme_N_F25_02uM									Sme_N_F25	_	02uM
Sm worms, F = 3
Sm-worms	S. mansoni	Worms	Native	Neutral	2mM	286	Smw_F01_2uM
Sm-worms	S. mansoni	Worms	Native	Neutral	2mM	287	Smw_F02_2uM
Sm-worms	S. mansoni	Worms	Native	Neutral	2mM	288	Smw_F03_2uM

## Sheet: Nglycans
Glycan class = N-glycans
Species = S. haematobium and S. mansoni
Life-stage = variable, as indicated in column E
(1) ID code used for statistical analysis
(2) Printing concentration on array in µM
(3) Main glycan motifs observed in fraction as determined using structural characterization
(4) m/z of AA-labeled glycans, observed in negative-ion mode in the MALDI-TOF-MS spectrum of the fraction [M-H]-
(5) Glycan compostion F = Fucose; H = Hexose; N= N-acetylhexosamine; X = Xylose -AA = AA label; ND = Not determined
(6) Percentage of the area of ion species in the MALDI-TOF-MS spectrum compared to the total spectrum area. Only ion species with area > 1% are included in this table.
Fraction info.					Fraction content
ID#	Array ID#1	Printing conc.2	Motifs3	Life-stage (+ species)	Observed masses4	Glycan composition5	%Fraction6
NG-1	14	2uM	M4	Worms (Sh)	948.405	H5-AA	0.360585
	15	20uM	GlcNAc		1030.44	H3N2-AA	0.0109155
					1110.45	H6-AA	0.0577953
					1162.5	H3N2X1-AA	0.0371548
					1192.53	H4N2-AA	0.368498
					1233.53	H3N3-AA	0.0794159
					1365.55	H3N3X1-AA	0.0326844
					1436.59	H3N4-AA	0.0529519
NG-2	24	2uM	Short	Eggs (Sh + Sm)	1014.33	H2N2F1-AA	0.0068537
	25	20uM	M4		1030.33	H3N2-AA	0.00957597
			GlcNAc		1146.27	H2N2X1-AA	0.032459
					1176.27	H3N2F1-AA	0.00981617
					1192.23	H4N2-AA	0.0412183
					1203.39	H2N3X1-AA	0.00855111
					1233.25	H3N3-AA	0.00518832
					1308.24	H3N2F1X1-AA	0.222361
					1338.25	H4N2F1-AA	0.0109851
					1379.25	H3N3F1-AA	0.19461
					1436.25	H3N4-AA	0.00803869
					1511.26	H3N3F1X1-AA	0.0917884
					1525.27	H3N3F2-AA	0.00847105
					1582.29	H3N4F1-AA	0.332661
					1714.3	H3N4F1X1-AA	0.0174225
NG-3	26	2uM	LDN	Sh (multiple)	1162.37	H3N2X1	0.0132412
	27	20uM	GlcNAc		1192.37	H4N2	0.032641
					1233.37	H3N3	0.0395926
					1308.36	H3N2F1X1	0.00665137
					1365.37	H3N3X1	0.0167747
					1379.38	H3N3F1	0.42762
					1395.37	H4N3	0.022279
					1436.39	H3N4	0.232521
					1525.41	H3N3F2	0.205115
NG-4	28	2uM	GlcNAc	Eggs (Sh)	1308.75	H3N2X1F1-AA	0.00632373
	29	20uM	LDN		1379.8	H4N2F1-AA	0.00706827
			LN		1500.84	H5N2F1-AA	0.0078653
					1511.87	H3N3X1F1-AA	0.0208194
					1541.88	H4N3F1-AA	0.0944131
					1552.89	H2N4X1F1-AA	0.00645656
					1568.9	H3N4X1-AA	0.0219133
					1582.91	H3N4F1-AA	0.0676504
					1672.96	H3N3F3-AA	0.0118488
					1687.97	H4N3F2-AA	0.0146909
					1703.97	H5N3F1-AA	0.00796698
					1711.8	H2N4F3-AA	0.0105057
					1715	H3N4X1F1-AA	0.411621
					1729.01	H3N4F2-AA	0.0127737
					1745.02	H4N4F1-AA	0.0587815
					1786.07	H3N5F1-AA	0.094869
					1851.12	H6N3X1-AA	0.00616793
					1861.14	H3N4X1F2-AA	0.00546766
					1877.14	H4N4X1F1-AA	0.0202536
					1918.18	H3N5X1F1-AA	0.0840961
					1989.25	H3N6F1-AA	0.00685344
					2125.27	H6N5-AA	0.00763898
NG-5	30	2uM	LN	Multiple (Sh + Sm)	1354.3	H5N2-AA	0.00949273
	31	10uM	LDN-F		1516.32	H6N2-AA	0.00750996
			LeX		1525.36	H3N3F2-AA	0.00866804
					1541.34	H4N3F1-AA	0.00517626
					1678.36	H7N2-AA	0.0078258
					1687.39	H4N3F2-AA	0.00586057
					1719.37	H6N3-AA	0.00840484
					1728.4	H3N4F2-AA	0.0117036
					1744.4	H4N4F1-AA	0.0115106
					1760.4	H5N4-AA	0.0110017
					1890.44	H4N4F2-AA	0.0168974
					1906.44	H5N4F1-AA	0.252391
					1917.44	H3N5F1X1-AA	0.00900142
					1931.46	H3N5F2-AA	0.0118264
					2052.48	H5N4F2-AA	0.0311277
					2063.49	H3N5X1F2-AA	0.0584127
					2109.49	H5N5F1-AA	0.0112825
					2120.5	H3N6F1X1-AA	0.019196
					2125.48	H6N5-AA	0.00865049
					2134.52	H3N6F2-AA	0.00866804
					2168.51	H4N4F3X1-AA	0.00833465
					2198.52	H5N4F3-AA	0.0134934
					2209.54	H3N5F3X1-AA	0.00749241
					2240.53	H5N5F1X1-AA	0.00800126
					2271.53	H6N5F1-AA	0.352459
					2280.54	H3N6F3-AA	0.00877332
					2312.55	H5N6F1-AA	0.0204945
					2323.53	H3N7F1X1-AA	0.0098963
					2330.54	H5N4F3X1-AA	0.0115106
					2355.57	H3N5F4X1-AA	0.008089
					2371.56	H4N5F3X1-AA	0.00514116
					2412.59	H3N6F3X1-AA	0.00666772
					2428.58	H4N6F2X1-AA	0.00852766
					2460.59	H4N4F5X1-AA	0.00647471
					2501.61	H3N5F5X1-AA	0.00675545
NG-7	32	2uM	Single LeX	Multiple (Sh)	1161.43	H2N2F2-AA	0.0156782
	33	10uM			1378.39	H4N2F1-AA	0.00547068
					1516.34	H6N2-AA	0.157115
					1541.42	H4N3F1-AA	0.0353593
					1553.38	H2N4F1X1-AA	0.0094069
					1582.43	H3N4F1-AA	0.0103076
					1687.43	H4N3F2-AA	0.0346921
					1744.43	H4N4F1-AA	0.278538
					1760.45	H5N4-AA	0.00960705
					1785.42	H3N5F1-AA	0.00783908
					1874.52	H3N4F3-AA	0.0129095
					1890.51	H4N4F2-AA	0.0161785
					1906.53	H5N4F1-AA	0.0203816
					1988.58	H3N6F1-AA	0.00890653
					2036.51	H4N4F3-AA	0.00820602
					2051.99	H5N4F2-AA	0.369404
NG-8	34	2uM	Multiple LeX	Eggs (Sh)	2052.67	H5N4F2-AA	0.0341045
	35	6uM			2198.72	H5N4F3-AA	0.0727962
					2417.78	H6N5F2-AA	0.0414838
					2563.85	H6N5F3-AA	0.220981
					2709.9	H6N5F4-AA	0.573394
					2750.94	H5N6F4-AA	0.0572397
NG-9	36	2uM	F-GlcNAc	Eggs (Sm)	1354.32	H5N2-AA	0.00536222
					1516.35	H6N2-AA	0.0647402
					1541.39	H4N3F1-AA	0.00531303
					1582.41	H3N4F1-AA	0.00624772
					1687.41	H4N3F2-AA	0.0624281
					1714.42	H3N4X1F1-AA	0.0342395
					1728.43	H3N4F2-AA	0.148912
					1760.43	H5N4-AA	0.00501786
					1801.42	H4N5-AA	0.00516544
					1819.46	H4N3F2X1-AA	0.00610014
					1860.47	H3N4F2X1-AA	0.23028
					1874.47	H3N4F3-AA	0.048014
					1931.5	H3N5F2-AA	0.021744
					1947.49	H4N5F1-AA	0.0340427
					2006.51	H3N4F3X1-AA	0.268997
NG-10	16	2uM	M6, M7, M8	Multiple (Sh + Sm)	1354.55	H5N2-AA	0.0115494
	17	10uM			1434.56	H8-AA	0.0101646
					1516.62	H6N2-AA	0.288274
					1541.63	H4N3F1-AA	0.00660793
					1596.63	H9-AA	0.051483
					1678.69	H7N2-AA	0.203685
					1703.71	H5N3F1-AA	0.00560373
					1719.72	H6N3-AA	0.00671545
					1728.75	H3N4F2-AA	0.00678426
					1744.76	H4N4F1-AA	0.0105151
					1758.71	H10-AA	0.0253157
					1760.77	H5N4-AA	0.00708961
					1810.74	H7N2X1-AA	0.00562524
					1824.77	H7N2F1-AA	0.00793038
					1840.77	H8N2-AA	0.173363
					1865.81	H6N3F1-AA	0.0621787
					1881.8	H7N3-AA	0.00524463
					1906.83	H5N34F1-AA	0.0244556
					2038.88	H5N4X1F1-AA	0.00528119
					2052.9	H5N4F2-AA	0.00894533
					2109.93	H5N5F1-AA	0.00910016
					2120.94	H3N6X1F1-AA	0.00730464
					2125.94	H6N5-AA	0.00871095
					2134.97	H3N6F2-AA	0.00861633
					2166.97	H5N6-AA	0.00644881
					2283.03	H4N6X1F1-AA	0.00607035
NG-11	18	2uM	M8, M9	Multiple (Sh + Sm)	1516.48	H6N2-AA	0.0108773
	19	10uM			1678.54	H7N2-AA	0.0481374
					1758.54	H10-AA	0.00570883
					1840.6	H8N2-AA	0.361716
					2002.66	H9N2-AA	0.489009
					2052.7	H5N4F2-AA	0.00831656
					2164.71	H10N2-AA	0.0632278
					2412.76	H3N6F3X1-AA	0.00775273
					2417.85	H3N5F2-AA	0.00525463
NG-12	20	2uM	LN	Eggs (Sm)	1308.47	H3N2F1X1-AA	0.0112227
			LeX		1511.53	H3N3F1X1-AA	0.0113744
			F/DF-GlcNAc		1678.52	H7N2-AA	0.0131756
			LDN-F		1744.61	H4N4F1-AA	0.024042
					1849.63	H5N3F2-AA	0.0267141
					1860.65	H3N4F2X1-AA	0.0205056
					1865.63	H6N3F1-AA	0.025698
					1876.65	H4N4F1X1-AA	0.0212446
					1890.64	H4N4F2-AA	0.0225839
					1906.65	H5N4F1-AA	0.0448841
					1917.67	H3N5F1X1-AA	0.0128655
					1947.69	H4N5F1-AA	0.0145743
					2006.7	H3N4F3X1-AA	0.0582643
					2022.7	H4N4F2X1-AA	0.0522868
					2037.69	H5N4F1X1-AA	0.0242795
					2052.69	H5N4F2-AA	0.0222276
					2063.72	H3N5F2X1-AA	0.025091
					2079.83	H4N5F1X1-AA	0.0193115
					2093.7	H4N5F2-AA	0.0235472
					2109.72	H5N5F1-AA	0.133221
					2134.74	H3N6F2-AA	0.0170419
					2150.75	H4N6F1-AA	0.0214821
					2152.86	H3N4F4X1-AA	0.0706482
					2168.84	H4N4F3X1-AA	0.0947298
					2209.89	H3N5F3X1-AA	0.0431094
					2225.81	H4N5F2X1-AA	0.00319988
					2241.77	H5N5F1X1-AA	0.00285021
					2266.78	H3N6F2X1-AA	0.00348358
					2282.89	H4N6F1X1-AA	0.027552
					2298.8	H5N6X1-AA	0.0229864
					2323.91	H3N7F1X1-AA	0.0194566
NG-13	21	2uM	LN	Cercariae (Sm)	1673.73	H4N3X1F1-AA	0.019014
	22	20uM			1687.76	H4N3F2-AA	0.13001
					1817.86	H3N3F4-AA	0.00915836
					1819.82	H4N3X1F2-AA	0.67613
					1890.9	H4N4F2-AA	0.0394074
					1906.9	H5N4F1-AA	0.088266
					2006.97	H3N4X1F3-AA	0.00857523
					2038.96	H5N4X1F1-AA	0.00734391
NG-15	23	2uM	LN	Eggs (Sm)	1678.73	H7N2-AA	0.0063738
			LeX		1849.85	H5N3F2-AA	0.0127476
			F/DF-GlcNAc		1860.86	H3N4X1F2-AA	0.00787026
			LDN-F		1865.85	H6N3F1-AA	0.00709432
					1876.86	H4N4X1F1-AA	0.00958842
					1890.89	H4N4F2-AA	0.0160176
					1906.89	H5N4F1-AA	0.0630175
					1947.91	H4N5F1-AA	0.00692805
					1965.91	H4N3X1F3-AA	0.00897875
					2006.96	H3N4X1F3-AA	0.0802545
					2022.96	H4N4X1F2-AA	0.0706107
					2052.96	H5N4F2-AA	0.00781484
					2063.98	H3N5X1F2-AA	0.0162393
					2079.99	H4N5X1F1-AA	0.0220035
					2094.01	H4N5F2-AA	0.0192323
					2110.01	H5N5F1-AA	0.130857
					2121	H3N6X1F1-AA	0.00615211
					2135.04	H3N6F2-AA	0.0112512
					2153.05	H3N4X1F4-AA	0.124151
					2169.06	H4N4X1F3-AA	0.130081
					2210.09	H3N5X1F3-AA	0.03004
					2226.08	H4N5X1F2-AA	0.00698347
					2242.08	H5N5X1F1-AA	0.00792569
					2267.12	H3N6X1F2-AA	0.0106969
					2283.13	H4N6X1F1-AA	0.0265483
					2299.16	H5N6X1-AA	0.0729939
					2324.17	H3N7X1F1-AA	0.0151863
					2355.18	H3N5X1F4-AA	0.00631838
					2445.26	H5N6X1F1-AA	0.00581956
					2527.33	H3N8X1F1-AA	0.0299846
					2591.37	H5N6X1F2-AA	0.00533183
NG-A1	37	2uM	α1-3 core Fuc	Eggs (Sm)	2158.07	H6N3F3-AA	0.00973843
			LeX		2199.11	H5N4F3-AA	0.0505405
			LDN		2240.16	H4N5F3-AA	0.0410918
					2345.24	H5N4F4-AA	0.123041
					2386.29	H4N5F4-AA	0.552401
					2402.28	H5N5F3-AA	0.00940738
					2413.3	H3N6X1F3-AA	0.00648309
					2418.29	H6N5F2-AA	0.00524165
					2427.34	H3N6F4-AA	0.0274497
					2532.4	H4N5F5-AA	0.0069107
					2559.45	H3N6X1F4-AA	0.0278773
					2573.45	H3N6F5-AA	0.00808317
					2605.46	H5N6F3-AA	0.00537958
					2819.7	H3N8X1F3-AA	0.0337534
					2835.71	H4N8X1F2-AA	0.0114075
					2965.86	H3N8X1F4-AA	0.0365536
NG-A2	38	2uM	α1-3 core Fuc	Eggs (Sm)	1834.24	H4N3F3-AA	0.00972587
			LeX		2199.55	H5N4F3-AA	0.0743143
			LDN		2240.59	H4N5F3-AA	0.00560075
					2345.7	H5N4F4-AA	0.617682
					2386.76	H4N5F4-AA	0.0547964
					2477.83	H5N4X1F4-AA	0.00822132
					2491.86	H7N6-AA	0.0154465
					2518.88	H4N5X1F4-AA	0.00548501
					2532.92	H4N5F5-AA	0.0623729
					2548.92	H5N5F4-AA	0.011342
					2564.93	H6N5F3-AA	0.0120034
					2573.97	H5N8-AA	0.00952334
					2752.16	H5N6F4-AA	0.00705983
					2763.18	H3N7X1F4-AA	0.0157276
					2820.24	H3N8X1F3-AA	0.00671263
					2966.43	H3N8X1F4-AA	0.0170916
NG-A3	39	2uM	α1-3 core Fuc	Eggs (Sm)	2199.06	H5N4F3-AA	0.0182057
			LeX		2210.09	H3N5X1F3-AA	0.0117153
			LDN		2345.18	H5N4F4-AA	0.079599
					2361.18	H6N4F3-AA	0.00630669
					2386.23	H4N5F4-AA	0.0126746
					2413.24	H3N6X1F3-AA	0.0133685
					2491.3	H5N4F5-AA	0.0185731
					2502.32	H3N5X1F5-AA	0.00828646
					2518.32	H4N5X1F4-AA	0.00579644
					2532.34	H4N5F5-AA	0.00710268
					2559.35	H3N6X1F4-AA	0.010552
					2564.36	H6N5F3-AA	0.00557193
					2605.42	H5N6F3-AA	0.00606177
					2616.43	H3N7X1F3-AA	0.0168178
					2637.43	H5N4F6-AA	0.0140625
					2762.6	H3N7X1F4-AA	0.16724
					2790.59	H9N3F4-AA	0.00618423
					2819.65	H3N8X1F3-AA	0.0440448
					2833.65	H3N8F4-AA	0.0145931
					2908.74	H3N7X1F5-AA	0.018022
					2965.82	H3N8X1F4-AA	0.382034
					2993.84	H9N4F4-AA	0.00963352
					3054.91	H3N7X1F6-AA	0.00655161
					3111.99	H3N8X1F5-AA	0.0360441
					3169.03	H3N9X1F4-AA	0.00542906
					3258.16	H3N8X1F6-AA	0.0136543
					1840.88	H8N2-AA	0.00763587
					2002.99	H9N2-AA	0.256136
					2054.98	H6N4X1-AA	0.00633699
					2165.09	H10N2-AA	0.70252
					2327.2	H11N2-AA	0.00942676
					2003.08	H9N2-AA	0.041749
					2053.18	H5N4F2-AA	0.00793403
					2165.21	H10N2-AA	0.0293109
					2226.31	H4N5X1F2-AA	0.0100821
					2272.37	H6N5F1-AA	0.00807262
					2372.39	H4N5X1F3-AA	0.0180854
					2402.4	H5N5F3-AA	0.00685999
					2413.47	H3N6X1F3-AA	0.0100128
					2418.51	H6N5F2-AA	0.0567162
					2459.54	H3N4F7-AA	0.0111215
					2534.61	H5N5X1F3-AA	0.00789939
					2550.63	H6N5X1F2-AA	0.0273014
					2559.61	H3N6X1F4-AA	0.0102553
					2564.63	H6N5F3-AA	0.0494058
					2575.61	H4N6X1F3-AA	0.0106365
					2591.66	H3N4X1F7-AA	0.0306274
					2605.68	H5N6F3-AA	0.0460451
					2632.7	H4N7X1F2-AA	0.0144129
					2637.7	H5N4F6-AA	0.019991
					2646.72	H4N7F3-AA	0.0144476
					2696.76	H6N5X1F3-AA	0.0247722
					2705.78	H3N6X1F5-AA	0.0134428
					2721.8	H4N6X1F4-AA	0.0117798
					2726.7	H7N5F3-AA	0.0125767
					2737.82	H3N4X1F8-AA	0.114922
					2751.84	H5N6F4-AA	0.0229706
					2778.89	H4N7X1F3-AA	0.0909469
					2792.9	H4N7F4-AA	0.0256037
					2819.96	H3N8X1F3-AA	0.0219312
					2833.83	H3N8F4-AA	0.0140318
					2851.99	H3N6X1F6-AA	0.0170114
					2883.98	H5N6X1F4-AA	0.0334685
					2925.05	H4N7X1F4-AA	0.0706094
					2939.05	H4N7F5-AA	0.00949312
					2966.11	H3N8X1F4-AA	0.0348543
					2998.12	H3N6X1F7-AA	0.00883484
					3071.22	H4N7X1F5-AA	0.0174964
					3112.27	H3N8X1F5-AA	0.0195752

## Sheet: GSL_Shc
Glycan class = GSL glycan
Species = S. haematobium
Life-stage = cercariae
(1) ID code used for statistical analysis
(2) Printing concentration on array in µM
(3) m/z of AA-labeled glycans, observed in negative-ion mode in the MALDI-TOF-MS spectrum of the fraction [M-H]-
(4) Glycan compostion F = Fucose; H = Hexose; N= N-acetylhexosamine; -AA = AA label; ND = Not determined
(5) Percentage of the area of ion species in the MALDI-TOF-MS spectrum compared to the total spectrum area. Only ion species with area > 1% are included in this table.
Fraction info.			Fraction content
ID#	Array ID#1	Printing conc.2	Observed masses3	Glycan composition4	%Fraction5
F01	52	2uM	-	-	-
F02	53	2uM	989.154	H4N1-AA	0.011801
	54	6uM	1135.21	F1H4N1-AA	0.900479
			1151.18	H5N1-AA	0.0524487
			1176.22	F1H3N2-AA	0.0242575
			1322.24	F2H3N2-AA	0.0110142
F03	55	2uM	1176.25	F1H3N2-AA	0.0137408
	56	6uM	1322.31	F2H3N2-AA	0.974902
			1614.4	H3N2F4-AA	0.011357
F04	57	2uM	1258.41	F1H4N1-AA	0.443193
			1322.28	F2H3N2-AA	0.556807
F05	58	2uM	1322.27	F2H3N2-AA	0.0132176
	59	6uM	1468.3	H3N2F3-AA	0.0129787
			1614.35	H3N2F4-AA	0.9492
			1760.36	H3N2F5-AA	0.0246039
F06	60	2uM	1500.37	H5N2F1-AA	0.00738528
			1516.37	H6N2-AA	0.984284
			1557.38	H5N3-AA	0.0083305
F07	45	2uM	1516.4	H6N2-AA	0.328634
			1671.46	H3N3F3-AA	0.00657619
			1817.49	H3N3F4-AA	0.022422
			1963.54	H3N3F5-AA	0.642367
F08	46	2uM	1646.62	H5N2F2-AA	0.233522
			1662.6	H6N2F1-AA	0.0236286
			1678.66	H7N2-AA	0.742849
F09	47	2uM	2020.84	H3N4F4-AA	0.00532759
			2167.01	H3N4F5-AA	0.994672
F10	48	2uM	2166.57	H3N4F5-AA	0.0170397
			2313.61	H3N4F6-AA	0.98296
F11	49	2uM	1919.14	ND	0.00715389
			2020.68	H3N4F4-AA	0.00614042
			2117.61	H7N2F3-AA	0.00429829
			2166.73	H3N4F5-AA	0.00673658
			2223.73	H3N5F4-AA	0.00709427
			2312.72	H3N4F6-AA	0.0894236
			2369.79	H3N5F5-AA	0.0485868
			2396.43	H3N8F1-AA	0.00661734
			2515.77	H3N5F6-AA	0.761889
			2567.63	ND	0.00924044
			2595.38	ND	0.0129962
			2661.8	H3N5F7-AA	0.0398233
F12	50	2uM	2224.21	H3N5F4-AA	0.0145047
	51	6uM	2264.07	H2N6F4-AA	0.0145442
			2370.3	H3N5F5-AA	0.107997
			2516.34	H3N5F6-AA	0.312562
			2543.22	ND	0.00922313
			2663.38	H3N5F7-AA	0.541169

## Sheet: GSL_She
Glycan class = GSL glycan
Species = S. haematobium
Life-stage = eggs
(1) ID code used for statistical analysis
(2) Printing concentration on array in µM
(3) Native glycans or HF-treated
(4) Wether glycan compostions contain acidic residues or not
(5) m/z of AA-labeled glycans, observed in negative-ion mode in the MALDI-TOF-MS spectrum of the fraction [M-H]-
(6) Glycan compostion A = Hexuronic acid; F = Fucose; H = Hexose; N= N-acetylhexosamine; -AA = AA label; ND = Not determined
(7) Percentage of the area of ion species in the MALDI-TOF-MS spectrum compared to the total spectrum area. Only ion species with area > 1% are included in this table.
Fraction info.					Fraction content
ID#	Array ID#1	Printing conc.2	Treatment3	Acidic or neutral4	Observed masses5	Glycan composition6	%Fraction7
HF_F01	95	2uM	HF	Unknown	-	-	-
	96	6uM
HF_F02	97	2uM	HF	Unknown	-	-	-
HF_F03	98	2uM	HF	Unknown	-	-	-
HFn_F01	93	2uM	HF	Neutral	988.698	H4N1-AA	1
HFn_F02	94	2uM	HF	Neutral	827.306	H3N1-AA	0.673854
					868.355	H2N2-AA	0.326146
HFn_F03	77	2uM	HF	Neutral	1030.35	H3N2-AA	0.976357
					1176.41	H3N2F1-AA	0.0236432
HFn_F04	78	2uM	HF	Neutral	1176.39	H3N2F1-AA	0.0184382
					1233.42	H3N3-AA	0.969598
					1379.47	H3N3F1-AA	0.011964
HFn_F05	79	2uM	HF	Neutral	1233.5	H3N3-AA	0.00906329
	80	6uM			1379.56	H3N3F1-AA	0.0156962
					1436.6	H3N4-AA	0.94238
					1582.66	H3N4F1-AA	0.0419241
HFn_F06	81	2uM	HF	Neutral	1436.64	H3N4-AA	0.0116894
	82	6uM			1582.68	H3N4F1-AA	0.00745423
					1639.72	H3N5-AA	0.927142
					1785.77	H3N5F1-AA	0.0476353
HFn_F07	83	2uM	HF	Neutral	1582.68	H3N4F1-AA	0.0880541
					1639.72	H3N5-AA	0.0729251
					1667.72	ND	0.0125792
					1728.73	H3N4F2-AA	0.037015
					1785.76	H3N5F1-AA	0.737368
					1931.82	H3N5F2-AA	0.052059
HFn_F08	84	2uM	HF	Neutral	1639.39	H3N5-AA	0.031355
	85	6uM			1785.41	H3N5F1-AA	0.0685383
					1842.45	H3N6-AA	0.838716
					1895.17	ND	0.00523158
					1931.43	H3N5F2-AA	0.0127807
					1988.45	H3N6F1-AA	0.039994
HFn_F09	86	2uM	HF	Neutral	1399.35	ND	0.00809939
					1557.59	H5N3	0.653759
					1598.63	H4N4	0.0134882
					1612.6	H3N4A1	0.299774
					1703.6	H5N3F1	0.0070668
					1758.62	H3N4A1F1	0.0464666
					1961.56	H3N5F1A1	0.00945466
HFn_F10	87	2uM	HF	Neutral	1639.48	H3N5-AA	0.00830863
					1758.43	H3N4A1F1-AA	0.00526935
					1785.49	H3N5F1-AA	0.0252082
					1842.52	H3N6-AA	0.543618
					1931.51	H3N5F2-AA	0.0146507
					1988.54	H3N6F1-AA	0.354778
					2045.56	H3N7-AA	0.0199577
					2134.55	H3N6F2-AA	0.0111315
					2191.57	H3N7F1-AA	0.00528817
HFn_F11	88	2uM	HF	Neutral	1394.41	H2N3A1F1-AA	0.014486
					1582.44	H3N4F1-AA	0.00658879
					1612.44	H3N4A1-AA	0.00802181
					1640.42	H3N5-AA	0.0163551
					1728.45	H3N4F2-AA	0.0123053
					1758.48	H3N4A1F1-AA	0.006581
					1785.47	H3N5F1-AA	0.417445
					1827.48	H7N2A1-AA	0.0188474
					1842.54	H3N6-AA	0.0102804
					1857.43	H2N6A1-AA	0.00716511
					1870.47	H1N6A2-AA	0.00586449
					1874.51	H3N4F3-AA	0.00825545
					1904.53	H3N4A1F2-AA	0.00582555
					1931.5	H3N5F2-AA	0.29595
					1988.56	H3N6F1-AA	0.107477
					2077.54	H3N5F3-AA	0.0786604
					2100.6	H1N8A1-AA	0.00825545
					2134.61	H3N6F2-AA	0.100467
					2223.53	H3N5F4-AA	0.00609034
					2280.59	H3N6F3-AA	0.00719626
					2369.74	H3N5F5-AA	0.0152648
HFn_F12	89	2uM	HF	Neutral	1842.78	H3N6-AA	0.00709536
	90	6uM			1988.8	H3N6F1-AA	0.0132851
	91	10uM			2045.79	H3N7-AA	0.708546
					2191.82	H3N7F1-AA	0.211865
					2248.85	H3N8F1-AA	0.0326464
					2337.86	H3N7F2-AA	0.0133598
HFn_F13	92	2uM	HF	Neutral	1596.54	H2N4A1F1-AA	0.00602857
					1843.57	H3N6-AA	0.026
					1899.6	ND	0.0133429
					1989.64	H3N6F1-AA	0.023
					2030.67	H2N7F1-AA	0.018
					2045.64	H3N7-AA	0.182857
					2073.64	ND	0.024
					2134.64	H3N6F2-AA	0.0178571
					2191.68	H3N7F1-AA	0.174286
					2220.67	H3N7A1-AA	0.0122143
					2233.67	H3N5F4-AA	0.201429
					2264.66	ND	0.0120286
					2281.73	H3N6F3-AA	0.0148571
					2337.71	H3N7F2-AA	0.0282857
					2369.7	H3N5F5-AA	0.157143
					2484.81	H3N7F3-AA	0.00871429
					2515.73	H3N5F6-AA	0.284286
					2573.74	H3N6F5-AA	0.0130429
					2662.74	H3N5F7-AA	0.0375714
HFa_F01	61	2uM	HF	Acidic	1233.48	H3N3-AA	0.00577554
					1309.38	H2N1A2F2-AA	0.0200527
					1399.29	ND	0.0352539
					1434.25	H8-AA	0.00984152
					1612.57	H3N4A1-AA	0.909255
					1815.64	H3N5A1-AA	0.0150164
HFa_F02	62	2uM	HF	Acidic	1436.54	H3N4-AA	0.00733781
	63	6uM			1511.68	ND	0.0169391
	64	10uM			1602.06	ND	0.0446743
					1637.07	H8N1-AA	0.0207817
					1815.69	H3N5A1-AA	0.856818
					1822.59	H5N2A1F2-AA	0.00535334
					1837.61	H4N2A2F2-AA	0.00554283
					1961.73	H3N5F1A1-AA	0.0221292
					2018.74	H3N6A1-AA	0.00829583
HFa_F03	65	2uM	HF	Acidic	1601.9	ND	0.0178701
	66	6uM			1612.56	H3N4A1-AA	0.0433113
					1636.88	H6N1A1F1-AA	0.00896711
					1747.64	H4N3A2-AA	0.00661433
					1758.57	H3N4A1F1-AA	0.00882521
					1815.62	H3N5A1-AA	0.640872
					1961.63	H3N5F1A1-AA	0.226421
					2018.58	H3N6A1-AA	0.0163276
					2164.56	H3N6F1A1-AA	0.00649532
HFa_F04	67	2uM	HF	Acidic	1639.51	H3N5-AA	0.0569375
	68	6uM			1714.06	ND	0.0464983
	69	10uM			1747.54	ND	0.00502718
					1804.59	ND	0.124575
					1815.56	H3N5A1-AA	0.168963
					1839.63	ND	0.0561679
					1961.56	H3N5F1A1-AA	0.159293
					1976.58	H9N1A1-AA	0.00638018
					2002.49	H9N2-AA	0.0051389
					2016.56	H8N2A1-AA	0.0220948
					2040.49	ND	0.01672
					2056.51	ND	0.0114198
					2098.73	H6N4A1-AA	0.0138775
					2107.61	H3N5F2A1-AA	0.01245
					2154.58	ND	0.00661602
					2164.64	H3N6F1A1-AA	0.0913706
					2221.69	H3N7A1-AA	0.122278
					2367.71	H3N7F1A1-AA	0.0438172
HFa_F05	70	2uM	HF	Acidic	1788.64	ND	0.0520141
					1890.07	H4N4F2-AA	0.00889639
					1932.62	H3N5F2-AA	0.0119092
					1961.73	H3N5F1A1-AA	0.028423
					1991.75	H5N3F3-AA	0.0355287
					2062.88	ND	0.00528667
					2092.68	H4N5F2-AA	0.00616779
					2153.47	H4N5A2-AA	0.0100617
					2164.81	H3N6F1A1-AA	0.0540037
					2194.81	ND	0.190718
					2221.91	H3N7A1-AA	0.00596883
					2367.91	H3N7F1A1-AA	0.318622
					2397.9	ND	0.148936
					2513.97	H3N7F2A1-AA	0.0468979
					2600.98	ND	0.0329707
HFa_F06	71	2uM	HF	Acidic	1757.52	H3N4A1F1-AA	0.00857116
	72	6uM			1917.26	ND	0.0381784
	73	10uM			2007.81	ND	0.0802344
	74	20uM			2019.19	H3N6A1-AA	0.00938321
					2042.95	H8N3-AA	0.0269722
					2063.19	ND	0.00880666
					2153.79	ND	0.0151609
					2165.2	H3N6A1F1-AA	0.00719068
					2188.91	H8N3F1-AA	0.00520522
					2222.2	H3N7A1-AA	0.554746
					2368.44	H3N7A1F1-AA	0.167168
					2425.61	H3N8A1-AA	0.0109789
					2452.4	H3N9-AA	0.00508342
					2514.66	H3N7A1F2-AA	0.0209143
					2628.76	H3N9A1-AA	0.0178001
HFa_F07	75	2uM	HF	Acidic	2165.03	H3N6F1A1-AA	0.0100285
					2180.04	H4N6A1-AA	0.00543153
					2222.03	H3N7A1-AA	0.0140668
					2312.11	H5N6F1-AA	0.0187781
					2338.03	H3N7F2-AA	0.00541807
					2368.14	H3N7F1A1-AA	0.439503
					2457.13	H3N6A1F3-AA	0.00610458
					2514.18	H3N7F2A1-AA	0.368832
					2660.24	H3N7F3A1-AA	0.107688
					2806.28	H3N7F4A1-AA	0.00656898
HFa_F08	76	2uM	HF	Acidic	2004.01	H4N6-AA	0.0087512
					2134.99	H3N6F2-AA	0.00532289
					2165	H3N6F1A1-AA	0.0187654
					2222.04	H3N7A1-AA	0.0172498
					2311.1	H3N6F2A1-AA	0.0220133
					2340.05	H3N6A2F1-AA	0.00721748
					2368.11	H3N7F1A1-AA	0.362678
					2458.07	H3N6A1F3-AA	0.0174663
					2485.18	H3N7F3-AA	0.00902185
					2514.16	H3N7F2A1-AA	0.344635
					2660.21	H3N7F3A1-AA	0.158965
					2745.23	H3N9F2-AA	0.00806553
					2807.29	H3N5F8-AA	0.0198481
N_F01	153	2uM	Native	Neutral	989.489	H4N1-AA	0.0871863
	154	6uM			1014.55	H2N2F1-AA	0.417107
	155	10uM			1030.55	H3N2-AA	0.495707
N_F02	156	2uM	Native	Neutral	1135.56	H4N1F1-AA	0.0314438
					1176.64	H3N2F1-AA	0.640231
					1192.64	H4N2-AA	0.0357236
					1233.67	H3N3-AA	0.242816
					1274.67	H2N4-AA	0.049786
N_F03	157	2uM	Native	Neutral	1354.59	H5N2-AA	0.0666868
					1379.63	H3N3F1-AA	0.0454637
					1409.62	H3N3A1-AA	0.102494
					1525.73	H3N3F2-AA	0.670187
					1582.76	H3N4F1-AA	0.0669885
					1612.75	H3N4A1-AA	0.0461678
N_F04	158	2uM	Native	Neutral	1379.74	H3N3F1-AA	0.0051756
	159	6uM			1436.78	H3N4-AA	0.0311082
	160	10uM			1582.86	H3N4F1-AA	0.929501
					1639.92	H3N5-AA	0.021898
N_F05	161	2uM	Native	Neutral	1399.39	ND	0.0142313
	162	6uM			1525.76	H3N3F2-AA	0.0391359
					1557.79	H5N3-AA	0.0630898
					1566.85	H2N4F2-AA	0.0484292
					1582.8	H3N4F1-AA	0.194974
					1598.78	H4N4-AA	0.0268983
					1612.79	H3N4A1-AA	0.153047
					1639.8	H3N5-AA	0.017329
					1728.86	H3N4F2-AA	0.145012
					1785.89	H3N5F1-AA	0.280883
N_F06	163	2uM	Native	Neutral	1436.52	H3N4-AA	0.0078811
					1582.97	H3N4F1-AA	0.596655
					1640.02	H3N5-AA	0.0100703
					1713.03	H2N4F3-AA	0.00959265
					1786	H3N5F1-AA	0.0915481
					1802.67	H2N3F5-AA	0.00525407
					1843.04	H3N6-AA	0.266684
					1858.64	H2N6A1-AA	0.00589092
N_F07	125	2uM	Native	Neutral	1728.82	H3N4F2-AA	0.0083907
	126	6uM			1785.84	H3N5F1-AA	0.0593208
	127	10uM			1931.96	H3N5F2-AA	0.771867
	128	20uM			1988.98	H3N6F1-AA	0.109956
N_F08	129	2uM	Native	Neutral	1786.1	H3N5F1-AA	0.0108797
	130	6uM			1932.2	H3N5F2-AA	0.176884
	131	10uM			1962.2	H3N5A1F1-AA	0.0164977
					1989.24	H3N6F1-AA	0.0785896
					2019.26	H3N6A1-AA	0.0845955
					2078.32	H3N5F3-AA	0.0409928
					2135.33	H3N6F2-AA	0.51514
					2192.39	H3N7F1-AA	0.0123366
					2222.33	H3N7A1-AA	0.00799732
N_F09	132	2uM	Native	Neutral	1932.18	H3N5F2-AA	0.00737127
	133	6uM			1951.03	H4N4A2-AA	0.00843457
	134	10uM			1989.2	H3N6F1-AA	0.00863574
	135	20uM			2019.17	H3N6A1-AA	0.0114592
					2078.26	H3N5F3-AA	0.00824778
					2135.29	H3N6F2-AA	0.105799
					2162.06	H8N2A1F1-AA	0.00526622
					2165.26	H3N6F1A1-AA	0.0325457
					2192.57	H3N7F1-AA	0.008607
					2222.16	H3N7A1-AA	0.0101445
					2281.37	H3N6F3-AA	0.649685
					2338.42	H3N7F2-AA	0.120261
N_F10	136	2uM	Native	Neutral	1685.97	H2N3A1F3-AA	0.0053186
	137	6uM			1846.41	ND	0.0163556
	138	10uM			1902.39	ND	0.0174332
	139	20uM			1932.17	H3N5F2-AA	0.00787362
	140	60uM			1950.92	H4N4A2-AA	0.00966386
					2005.95	H4N6-AA	0.0484236
					2062.93	H2N5F4-AA	0.0412279
					2096.7	H4N4A2F1-AA	0.0701499
					2131.85	H8N2F2-AA	0.029878
					2153.67	H4N5A2-AA	0.0657178
					2165.24	H3N6F1A1-AA	0.0302083
					2189	H8N3F1-AA	0.0369869
					2222.69	H3N7A1-AA	0.0183022
					2311.76	H5N6F1-AA	0.274933
					2368.82	H3N7F1A1-AA	0.262402
					2397.33	H3N7A2-AA	0.0052317
					2448.53	H6N5A1F1-AA	0.0115063
					2514.44	H3N7A1F2-AA	0.0155908
					2629.23	H3N7F4-AA	0.00594432
N_F11	141	2uM	Native	Neutral	1525.81	H3N3F2-AA	0.00907252
	142	6uM			2078.03	H3N5F3-AA	0.00663453
	143	10uM			2135.07	H3N6F2-AA	0.0177853
	144	20uM			2165.05	H3N6F1A1-AA	0.0153474
	145	60uM			2222.06	H3N7A1-AA	0.0095921
					2281.14	H3N6F3-AA	0.0867285
					2311.14	H3N6F2A1-AA	0.00895262
					2338.16	H3N7F2-AA	0.0631879
					2364.69	H6N3A2F2-AA	0.0122699
					2368.16	H3N7F1A1-AA	0.0126296
					2427.22	H3N6F4-AA	0.0326931
					2484.29	H3N7F3-AA	0.66761
					2541.3	H3N7F2A1-AA	0.0103914
					2563.2	H4N5F4A1-AA	0.0235006
N_F12	146	2uM	Native	Neutral	1582.69	H3N4F1-AA	0.0064429
					1826.89	H2N6F1-AA	0.0154578
					1875.02	H3N4F3-AA	0.323444
					2035.43	H3N6F2-AA	0.229918
					2194.82	H3N6A2-AA	0.012613
					2296.2	H4N6F2-AA	0.00679362
					2340.92	H3N6A2F1-AA	0.376702
					2398.7	ND	0.00998909
					2602.05	H3N6A1F4-AA	0.00972929
N_F13	147	2uM	Native	Neutral	2208.04	H4N7-AA	0.0169689
	148	6uM			2280.9	H3N6F3-AA	0.0126988
	149	10uM			2298.93	H4N5A2F1-AA	0.0321555
					2334.1	H6N3A1F3-AA	0.0137756
					2337.95	H3N7F2-AA	0.0125132
					2367.93	H3N7F1A1-AA	0.00612663
					2426.95	H3N6F4-AA	0.0284424
					2483.99	H3N7F3-AA	0.154874
					2510.34	H6N3A2F3-AA	0.0111393
					2513.98	H3N7F2A1-AA	0.0511667
					2541	H3N8F2A1-AA	0.0072777
					2630.06	H3N7F4-AA	0.620386
					2681.23	ND	0.0050127
					2687.06	H3N8F3-AA	0.025769
N_F14	150	2uM	Native	Neutral	1339.52	H4N2F1-AA	0.015583
					1409.57	H3N3A1-AA	0.00809908
					1542.6	H4N3F1-AA	0.0129688
					1585.62	H3N3A2-AA	0.0056386
					1612.68	H3N4A1-AA	0.00656128
					1688.93	ND	0.00609994
					1703.04	H5N3F1-AA	0.0128663
					1788.66	ND	0.00553608
					1862.74	ND	0.0260401
					2107.08	H3N5F2A1-AA	0.00994443
					2167.83	H5N6-AA	0.56591
					2205.79	H9N3-AA	0.00804782
					2253.47	H3N5A1F3-AA	0.00825286
					2314.86	ND	0.00830412
					2371.95	ND	0.0124562
					2413.86	ND	0.0116873
					2573.97	H3N6F5-AA	0.121486
					2720.02	H3N6F6-AA	0.131226
					2747.78	H3N6A1F5-AA	0.00681758
N_F15	151	2uM	Native	Neutral	2484.1	H3N7F3-AA	0.0229467
	152	6uM			2514.05	H3N7F2A1-AA	0.0226181
					2630.15	H3N7F4-AA	0.171416
					2660.11	H3N7F3A1-AA	0.0307234
					2687.18	H3N8F3-AA	0.0204275
					2776.2	H3N7F5-AA	0.183738
					2833.24	H3N8F4-AA	0.179959
					2890.27	H3N9F3-AA	0.033626
					2979.28	H3N8F5-AA	0.0846127
					3036.34	H3N9F4-AA	0.110626
					3125.36	H3N8F6-AA	0.0164296
					3182.46	H3N9F5-AA	0.0654995
					3328.57	ND	0.0141295
A_F01	121	2uM	Native	Acidic	1409.71	H3N3A1-AA	0.969919
					1475.76	H7N1-AA	0.00697475
					1612.8	H3N4A1-AA	0.0186778
A_F02	122	2uM	Native	Acidic	1233.68	H3N3-AA	0.0239127
	123	6uM			1309.34	ND	0.0195264
	124	10uM			1399.49	ND	0.0450495
					1409.78	H3N3A1-AA	0.00781904
					1434.43	H8-AA	0.0261588
					1500.85	H5N2F1-AA	0.00551994
					1610.88	ND	0.0137946
					1612.91	H3N4A1-AA	0.81994
					1634.84	ND	0.00853949
					1650.75	ND	0.00633575
					1693.78	ND	0.0089421
A_F03	99	2uM	Native	Acidic	1436.75	H3N4-AA	0.0115921
	100	6uM			1511.93	ND	0.0239339
	101	10uM			1602.38	ND	0.058218
					1612.8	H3N4A1-AA	0.0314755
					1637.39	ND	0.0319007
					1728.84	H3N4F2-AA	0.00720592
					1758.86	H3N4A1F1-AA	0.00694856
					1815.97	H3N5A1-AA	0.774714
					1837.89	ND	0.00546038
					1896.31	H6N3A1-AA	0.0150384
					1961.98	H3N5F1A1-AA	0.00563941
					2019.08	H3N6A1-AA	0.011883
A_F04	102	2uM	Native	Acidic	1336.67	H2N2A1F2-AA	0.0122195
	103	6uM			1539.77	H2N3A1F2-AA	0.00916466
	104	10uM			1582.8	H3N4F1-AA	0.0187536
	105	20uM			1657.35	ND	0.0300397
	106	60uM			1700.34	ND	0.0073487
					1747.91	ND	0.0837548
					1782.9	ND	0.0398832
					1785.9	H3N5F1-AA	0.00933437
					1815.88	H3N5A1-AA	0.014935
					1849.92	H5N3F2-AA	0.0416653
					1859.98	ND	0.0548182
					1893.68	H4N3A2F1-AA	0.0323309
					1950.63	H4N4A2-AA	0.0383558
					1961.96	H3N5F1A1-AA	0.272055
					1985.75	H6N2A1F2-AA	0.0460779
					1991.95	ND	0.014341
					2018.97	H3N6A1-AA	0.0141713
					2062.63	H2N5F4-AA	0.0177353
					2108.03	H3N5F2A1-AA	0.0493873
					2153.39	H4N5A2-AA	0.0243542
					2165.07	H3N6F1A1-AA	0.0823971
					2188.53	H6N3A1F2-AA	0.00641526
					2222.08	H3N7A1-AA	0.00614372
					2244.88	H6N4A1F1-AA	0.00511693
					2368.17	H3N7F1A1-AA	0.0337735
A_F05	107	2uM	Native	Acidic	1657.39	ND	0.00502927
	108	6uM			1747.97	ND	0.0158422
	109	10uM			1756.96	ND	0.00872992
	110	20uM			1783.02	ND	0.00631662
	111	60uM			1785.93	H3N5F1-AA	0.00969074
					1842.98	H3N6-AA	0.00576865
					1849.97	H5N3F2-AA	0.00614022
					1859.99	ND	0.0477331
					1892.03	ND	0.00520192
					1916.98	H3N5A1-AA	0.0250863
					1950.67	ND	0.117768
					1962.02	H3N5F1A1-AA	0.0575552
					1985.8	H6N2A1F2-AA	0.0469749
					2007.7	ND	0.0465696
					2019.06	H3N6A1-AA	0.0138155
					2042.84	H6N3A1F1-AA	0.0219937
					2119.66	H2N6F3-AA	0.00666942
					2165.18	H3N6F1A1-AA	0.31353
					2210.46	ND	0.00919156
					2222.23	H3N7A1-AA	0.154598
					2245.49	H3N5A1F3-AA	0.00762648
					2425.29	H3N8A1-AA	0.0202897
A_F06	112	2uM	Native	Acidic	2047.51	ND	0.0426503
	113	6uM			2062.61	H2N5F4-AA	0.00699357
	114	10uM			2153.45	ND	0.0104599
	115	20uM			2188.44	H6N3A1F2-AA	0.00648503
	116	60uM			2208.33	H4N7-AA	0.10308
					2299.19	ND	0.14718
					2311.08	H3N6A1F2-AA	0.00506806
					2334.41	H6N3A1F3-AA	0.0700661
					2368.21	H3N7F1A1-AA	0.0127093
					2514.36	H3N7F2A1-AA	0.541936
					2593.48	H6N5A1F2-AA	0.0188574
A_F07	117	2uM	Native	Acidic	2193.07	ND	0.0135007
	118	6uM			2208.42	H4N7-AA	0.0114746
	119	10uM			2299.28	H4N5A2F1-AA	0.0160977
	120	20uM			2334.43	H6N3A1F3-AA	0.0105721
					2354.21	H4N7F1-AA	0.0277749
					2368.13	H3N7F1A1-AA	0.00620699
					2445.13	H4N5A2F2-AA	0.0377208
					2480.37	H6N3A1F4-AA	0.0204997
					2514.19	H3N7F2A1-AA	0.132354
					2592.31	H4N5A2F3-AA	0.00944863
					2660.36	H3N7F3A1-AA	0.513799
					2717.36	H3N8F2A1-AA	0.0185289
					2738.83	H4N5A2F4-AA	0.0189157
					2806.23	H3N7A1F4-AA	0.0117878
					2863.49	H3N8F3A1-AA	0.0546105
					2920.89	H3N9F2A1-AA	0.0313297
					3009.52	H3N8F4A1-AA	0.0170738
					3066.6	H3N9A1F3-AA	0.0290274
A_F08	165	2uM	Native	Acidic	1657.4	ND	0.0354943
	166	6uM			1714.38	ND	0.00763787
	167	10uM			1747.99	ND	0.112465
	168	20uM			1757.62	H3N4A1F1-AA	0.0118175
	169	60uM			1783.03	ND	0.0468754
					1804.98	ND	0.0171269
					1816.07	H3N3F4-AA	0.0158552
					1840.59	H8N2-AA	0.0125743
					1917.09	ND	0.0239338
					1962.13	H3N5F1A1-AA	0.384198
					2007.79	ND	0.0460455
					2019.2	H3N6A1-AA	0.0663081
					2042.95	H6N3A1F1-AA	0.0267073
					2222.5	H3N7A1-AA	0.153735
UN_F01	164	2uM	Native	Unknown	1163.37	ND	0.00761024
					1206.4	H3N2A1-AA	0.00552632
					1409.46	H3N3A1-AA	0.00761024
					1484.28	H4N2F2-AA	0.0772404
					1585.49	ND	0.0168563
					1609.73	ND	0.0192745
					1788.58	ND	0.79936
					1812.49	ND	0.00896159
					1826.51	H2N6F1-AA	0.0107397
					1841.46	H3N6-AA	0.0203414
					1868.48	ND	0.0171408

## Sheet: GSL_Shw
Glycan class = GSL glycan
Species = S. haematobium
Life-stage = worms
(1) ID code used for statistical analysis
(2) Printing concentration on array in µM
(3) m/z of AA-labeled glycans, observed in negative-ion mode in the MALDI-TOF-MS spectrum of the fraction [M-H]-
(4) Glycan compostion A = Hexuronic acid; F = Fucose; H = Hexose; N= N-acetylhexosamine; -AA = AA label; ND = Not determined
(5) Percentage of the area of ion species in the MALDI-TOF-MS spectrum compared to the total spectrum area. Only ion species with area > 1% are included in this table.
Fraction info.			Fraction content
ID#	Array ID#1	Printing conc.2	Observed masses3	Glycan composition4	%Fraction5
F01	170	2uM	989.304	H4N1-AA	0.00688296
			1030.36	H3N2-AA	0.00630994
			1075.16	H3N2F1-AA	0.019994
			1135.39	H4N1F1-AA	0.0101164
			1176.42	H3N2F1-AA	0.0483785
			1192.41	H4N2-AA	0.00648048
			1206.39	H3N2A1-AA	0.0125926
			1322.47	H3N2F2-AA	0.383297
			1354.46	H5N2-AA	0.155238
			1395.49	H4N3-AA	0.00701257
			1436.51	H3N4-AA	0.0192846
			1458.47	H4N1A1F2-AA	0.00611212
			1468.52	H3N2F3-AA	0.249267
			1474.48	H7N1-AA	0.0104779
			1582.56	H3N4F1-AA	0.00515028
			1614.58	H3N2F4-AA	0.0350765
F02	171	2uM	1014.39	H2N2F1-AA	0.0169781
			1040.37	ND	0.111246
			1058.4	ND	0.397158
			1076.42	ND	0.263178
			1098.39	ND	0.0311208
			1114.37	ND	0.0414717
			1120.36	ND	0.0269702
			1130.36	ND	0.0215899
			1134.46	H4N1F1-AA	0.0354593
			1138.36	ND	0.0217265
			1192.38	H4N2-AA	0.00891607
			1212.43	ND	0.0169098
			1228.42	ND	0.00727633
F03	172	2uM	1134.45	H4N1F1-AA	0.0889353
			1337.53	H2N2A1F2-AA	0.0643562
			1405.52	H1N4F2-AA	0.303795
			1423.55	ND	0.401978
			1441.55	H3N1A1F3-AA	0.140935

## Sheet: GSL_Smc
Glycan class = GSL glycan
Species = S. mansoni
Life-stage = cercariae
(1) ID code used for statistical analysis
(2) Printing concentration on array in µM
(3) m/z of AA-labeled glycans, observed in negative-ion mode in the MALDI-TOF-MS spectrum of the fraction [M-H]-
(4) Glycan compostion F = Fucose; H = Hexose; N= N-acetylhexosamine; -AA = AA label; ND = Not determined
(5) Percentage of the area of ion species in the MALDI-TOF-MS spectrum compared to the total spectrum area. Only ion species with area > 1% are included in this table.
Fraction info.			Fraction content
ID#	Array ID#1	Printing conc.2	Observed masses3	Glycan composition4	%Fraction5
F01	173	2uM	868.415	H2N2-AA	0.017664
			1014.55	H2N2F1-AA	0.97511
F02	174	2uM	1258.65	H1N4F1-AA	0.00585668
			1363.71	H2N3F2-AA	0.0467932
			1404.75	H1N4F2-AA	0.123053
			1420.75	H2N4F1-AA	0.181274
			1550.83	H1N4F3-AA	0.0891485
			1566.82	H2N4F2-AA	0.0425567
			1607.84	H1N5F2-AA	0.00976299
			1696.91	H1N4F4-AA	0.468987
			1842.98	H1N4F5-AA	0.0119204
F03	175	2uM	1875.02	H3N4F3-AA	0.00534042
			1914.1	H7N1F3-AA	0.00630012
			1916.07	H2N5F3-AA	0.136062
			1932.06	H3N5F2-AA	0.0898783
			1948.05	H4N5F1-AA	0.0123631
			1957.09	H1N6F3-AA	0.0262053
			1973.09	H2N6F2-AA	0.00767192
			2062.14	H2N5F4-AA	0.150322
			2076.09	H8N1F3-AA	0.00734449
			2078.17	H3N5F3-AA	0.00265892
			2103.17	H1N6F4-AA	0.0116462
			2119.18	H2N6F3-AA	0.0053009
			2192.22	H1N5F6-AA	0.00764369
			2208.23	H2N5F5-AA	0.149498
			2249.25	H1N6F5-AA	0.00856387
			2354.31	H2N5F6-AA	0.150254
			2395.34	H1N6F6-AA	0.0480469
			2500.38	H2N5F7-AA	0.0481146
F04	176	2uM	1874.81	H3N4F3-AA	0.0911394
			1890.8	H4N4F2-AA	0.0219339
			1906.79	H5N4F1-AA/H3N2F6-AA	0.00770954
			1915.83	H2N5F3-AA	0.0110008
			1931.82	H3N5F2-AA	0.0234442
			1947.83	H4N5F1-AA	0.00885921
			1972.86	H2N6F2-AA	0.00798005
			2061.89	H2N5F4-AA	0.0272539
			2077.88	H3N5F3-AA	0.0315821
			2091.95	H9N1F2-AA	0.00825056
			2093.89	H4N5F2-AA	0.126373
			2118.93	H2N6F3-AA	0.0438678
			2134.92	H3N6F2-AA	0.0958508
			2175.95	H2N7F2-AA	0.00779971
			2207.97	H2N5F5-AA	0.0314243
			2223.96	H3N5F4-AA	0.00559055
			2237.93	H9N1F3-AA	0.00712344
			2265	H2N6F4-AA	0.109827
			2278.97	H8N2F3-AA	0.0592192
			2354.03	H2N5F6-AA	0.0121955
			2411.07	H2N6F5-AA	0.112329
			2500.11	H2N5F7-AA	0.0141116
			2557.15	H2N6F6-AA	0.097023
F05	177	2uM	1785.87	H3N5F1-AA	0.00552675
			1915.95	H2N5F3-AA	0.0171835
			1931.95	H3N5F2-AA	0.102481
			1947.94	H4N5F1-AA	0.0158303
			1972.98	H2N6F2-AA	0.0133522
			2062.02	H2N5F4-AA	0.0128958
			2078.02	H3N5F3-AA	0.0182595
			2094.01	H4N5F2-AA	0.00686361
			2119.05	H2N6F3-AA	0.0836023
			2135.05	H3N6F2-AA	0.0307803
			2151.05	H4N6F1-AA	0.00950471
			2160.07	H1N7F3-AA	0.00534742
			2208.09	H2N5F5-AA	0.0117382
			2265.12	H2N6F4-AA	0.0777821
			2354.17	H2N5F6-AA	0.0450944
			2395.2	H3N8F1-AA	0.0202322
			2411.2	H2N6F5-AA	0.109378
			2500.25	H2N5F7-AA	0.012423
			2557.28	H2N6F6-AA	0.133327
			2703.36	H2N6F7-AA	0.192214
			2849.44	H2N6F8-AA	0.00707555
F06	178	2uM	1217.5	H2N3F1-AA	0.00922342
			2239.91	H4N5F3-AA	0.00619935
			2484.03	H3N7F3-AA	0.00696911
			2630.1	H3N7F4-AA	0.031739
			2760.17	H4N9F1-AA	0.00551206
			2776.18	H3N7F5-AA	0.158118
			2906.25	H2N7F7-AA	0.00718904
			2922.26	H3N7F6-AA	0.194901
			3052.33	H2N7F8-AA	0.00511343
			3068.34	H3N7F7-AA	0.155176
			3096.38	ND	0.00683165
			3214.43	H3N7F8-AA	0.161554
			3242.46	H17N1F1-AA	0.00735399
			3360.52	H3N7F9-AA	0.127368
			3388.55	H17N1F2-AA	0.0055533
			3506.61	H3N7F10-AA	0.0405913
F07	179	2uM	1566.6	H2N4F2-AA	0.00790874
	180	6uM	2629.96	H3N7F4-AA	0.00529578
			2775.99	H3N7F5-AA	0.0275409
			2833.03	H3N8F4-AA	0.0176899
			2922.04	H3N7F6-AA	0.0414161
			2979.09	H3N8F5-AA	0.0939407
			3068.11	H3N7F7-AA	0.0354077
			3125.16	H3N8F6-AA	0.229577
			3214.19	H3N7F8-AA	0.0372102
			3271.24	H3N8F7-AA	0.160997
			3299.25	ND	0.00530975
			3360.26	H3N7F9-AA	0.0298185
			3417.32	H3N8F8-AA	0.123899
			3445.34	ND	0.00427575
			3506.35	H3N7F10-AA	0.0167118
			3563.39	H3N8F9-AA	0.0667073
			3709.46	H3N8F10-AA	0.0466699
F08	181	2uM	1055.44	H1N3F1-AA	0.0194928
	182	6uM	1201.54	H1N3F2-AA	0.00660388
			1217.52	H2N3F1-AA	0.0211324
			1258.56	H1N4F1-AA	0.00684071
			1363.61	H2N3F2-AA	0.00502806
			1404.61	H1N4F2-AA	0.00563834
			1420.62	H2N4F1-AA	0.00825257
			1566.7	H2N4F2-AA	0.00719595
			1769.78	H2N5F2-AA	0.00623952
			1858.83	H2N4F4-AA	0.00685892
			1915.83	H2N5F3-AA	0.00908147
			2061.92	H2N5F4-AA	0.0112038
			2223.96	H3N5F4-AA	0.0112949
			3328.43	H3N9F6-AA	0.010384
			3344.45	H2N7F10-AA	0.0146652
			3474.5	H3N9F7-AA	0.0228631
			3490.52	H2N7F11-AA	0.0531954
			3620.59	H5N11F3-AA	0.0266888
			3636.61	H2N7F12-AA/H4N9F7-AA	0.107393
			3677.61	H5N12F2-AA/H3N10F7-AA	0.0112038
			3693.64	H2N8F11-AA/H4N10F6-AA	0.0127523
			3766.69	H5N11F4-AA/H3N9F9-AA	0.0207681
			3782.7	H4N9F8-AA	0.139
			3823.7	H3N10F8-AA	0.0140275
			3839.73	H4N10F7-AA	0.0235007
			3912.77	H5N11F5-AA/H3N9F10-AA	0.0161226
			3928.82	H4N9F9-AA/H2N7F14-AA	0.107211
			3969.82	H5N12F4-AA/H3N10F9-AA	0.0126612
			3985.83	H2N8F13-AA/H4N10F8-AA	0.0286016
			4058.86	H5N11F6-AA/H3N9F11-AA	0.00929097
			4074.93	H4N9F10-AA/H6N11F5-AA	0.113951
			4115.92	H5N12F5-AA/H3N10F10-AA	0.0118414
			4131.92	H4N10F9-AA	0.0245027
			4221.02	H6N11F6-AA/H4N9F11-AA	0.0265066
			4278.05	H6N12F5-AA/H4N10F10-AA/	0.0187641
			4367.14	H8N13F2-AA/H6N11F7-AA/H4N9F12-AA/H2N7F17-AA	0.0214057
			4424.14	H4N10F11-AA	0.0102019
F09	183	2uM	1055.41	H1N3F1-AA	0.0759623
F10	184		1201.48	H1N3F2-AA	0.0219033
			1217.5	H2N3F1-AA	0.153478
			1258.51	H1N4F1-AA	0.0260975
			1363.55	H2N3F2-AA	0.0250101
			1404.58	H1N4F2-AA	0.0164663
			1420.57	H2N4F1-AA	0.0619815
			1566.64	H2N4F2-AA	0.0549911
			1623.66	H2N5F1-AA	0.0161556
			1712.69	H2N4F3-AA	0.0166216
			1769.72	H2N5F2-AA	0.047224
			1858.75	H2N4F4-AA	0.0228353
			1915.78	H2N5F3-AA	0.0340199
			1931.78	H3N5F2-AA	0.0483114
			1972.79	H2N6F2-AA	0.0117749
			2061.84	H2N5F4-AA	0.034486
			2077.84	H3N5F3-AA	0.0318452
			2118.84	H2N6F3-AA	0.0125206
			2134.83	H3N6F2-AA	0.0180197
			2223.89	H3N5F4-AA	0.0456706
			2280.92	H3N6F3-AA	0.0254761
			2426.97	H3N6F4-AA	0.0223693
			2484	H3N7F3-AA/H1N5F8-AA	0.0161556
			2573.01	H3N6F5-AA	0.0178644
			2630.03	H3N7F4-AA	0.0169323
			2646.04	H2N5F8-AA	0.0156896
			2776.11	H3N7F5-AA	0.0198838
			2792.1	H2N5F9-AA	0.0161556
			2938.15	H2N5F10-AA	0.0194178
F10	184	2uM	852.233	H1N2F1-AA	0.0292625
			1055.35	H1N3F1-AA	0.126157
			1201.42	H1N3F2-AA	0.0269483
			1217.42	H2N3F1-AA	0.217229
			1258.45	H1N4F1-AA	0.0265004
			1363.49	H2N3F2-AA	0.0318752
			1420.51	H2N4F1-AA	0.0578531
			1566.56	H2N4F2-AA	0.0652434
			1769.63	H2N5F2-AA	0.083607
			1915.69	H2N5F3-AA	0.0400866
			1931.68	H3N5F2-AA	0.0992834
			2061.73	H2N5F4-AA	0.0371753
			2077.74	H3N5F3-AA	0.0409077
			2223.77	H3N5F4-AA	0.0441923

## Sheet: GSL_Sme
Glycan class = GSL glycan
Species = S. mansoni
Life-stage = eggs
(1) ID code used for statistical analysis
(2) Printing concentration on array in µM
(3) Native glycans or HF-treated
(4) Wether glycan compostions contain acidic residues or not
(5) m/z of AA-labeled glycans, observed in negative-ion mode in the MALDI-TOF-MS spectrum of the fraction [M-H]-
(6) Glycan compostion A = Hexuronic acid; F = Fucose; H = Hexose; N= N-acetylhexosamine; -AA = AA label; ND = Not determined
(7) Percentage of the area of ion species in the MALDI-TOF-MS spectrum compared to the total spectrum area. Only ion species with area > 1% are included in this table.
Fraction info.					Fraction content
ID#	Array ID#1	Printing conc.2	Treatment3	Acidic or neutral4	Observed masses5	Glycan composition6	%Fraction7
HFn_F01	188	2uM	HF	Neutral	-	-	-
	189	20uM
HFn_F02	190	2uM	HF	Neutral	909.187	H1N3-AA	0.0125501
	191	6uM			1071.24	H2N3-AA	0.00612515
	192	10uM			1112.27	H1N4-AA	0.0258768
					1217.29	H2N3F1-AA	0.00374487
					1258.31	H1N4F1-AA	0.0402037
					1273.32	H2N4-AA	0.0159822
					1315.36	H1N5-AA	0.758222
					1404.36	H1N4F2-AA	0.0161541
					1461.39	H1N5F1-AA	0.0652264
					1518.4	H1N6-AA	0.0100406
					1560.4	ND	0.00516632
					1607.43	H1N5F2-AA	0.00516244
					1631.25	H4N2F3-AA	0.0116132
					1721.46	H1N7-AA	0.00633707
					1924.52	H1N8-AA	0.0054674
					2534.31	H1N11-AA	0.00636421
HFn_F03	193	2uM	HF	Neutral	1112.62	H1N4-AA	0.0111682
					1189.26	ND	0.00827935
					1258.7	H1N4F1-AA	0.0102747
					1274.7	H2N4-AA	0.00772839
					1315.74	H1N5-AA	0.0954657
					1404.79	H1N4F2-AA	0.0244807
					1461.84	H1N5F1-AA	0.614489
					1477.82	H2N5-AA	0.00953019
					1489.83	H6N1A1-AA	0.00710297
					1518.86	H1N6-AA	0.0916536
					1540.9	H4N3F1-AA	0.0131487
					1550.88	H1N4F3-AA	0.0091877
					1597.85	H4N4-AA	0.00653712
					1607.91	H1N5F2-AA	0.027846
					1613.86	H3N2F4-AA	0.0102896
					1664.94	H1N6F1-AA	0.0528181
HFn_F04	194	2uM	HF	Neutral	909.458	H1N3-AA	0.0158047
	195	6uM			1112.57	H1N4-AA	0.0130444
	196	10uM			1315.69	H1N5-AA	0.0175994
					1461.77	H1N5F1-AA	0.032792
					1518.79	H1N6-AA	0.679131
					1546.82	ND	0.0350661
					1607.85	H1N5F2-AA	0.0358557
					1654.85	H2N3F4-AA	0.0106531
					1664.89	H1N6F1-AA	0.120091
					1810.98	H1N6F2-AA	0.0107755
					1928.92	H1N5A1F3-AA	0.0060136
HFn_F05	197	2uM	HF	Neutral	1075.31		0.0147525
					1314.64		0.00735689
					1461.75	H1N5F1	0.0135793
					1518.79	H1N6	0.0404973
					1607.86	H1N5F2	0.0154314
					1622.84		0.00728384
					1664.89	H1N6F1	0.744185
					1692.89		0.0210436
					1721.91	H1N7	0.0438405
					1810.97	H1N6F2	0.0579914
					1867.99	H1N7F1	0.0218816
					2075.07		0.0121569
HFn_F06	198	2uM	HF	Neutral	1258.58	H1N4F1-AA	0.011279
					1461.66	H1N5F1-AA	0.0206159
					1518.69	H1N6-AA	0.032359
					1607.73	H1N5F2-AA	0.0320969
					1664.77	H1N6F1-AA	0.604212
					1692.77	ND	0.0556689
					1721.78	H1N7-AA	0.0118677
					1753.8	H1N5F3-AA	0.0219866
					1800.79	H2N3F5-AA	0.00606274
					1810.83	H1N6F2-AA	0.134888
					1816.78	H3N3F4-AA	0.0111157
					1867.86	H1N7F1-AA	0.0197308
					1956.89	H1N6F3-AA	0.0118935
HFn_F07	199	2uM	HF	Neutral	1112.42	H1N4-AA	0.00787855
					1315.49	H1N5-AA	0.00883612
					1518.57	H1N6-AA	0.0152044
					1664.62	H1N6F1-AA	0.0441884
					1679.64	ND	0.0100272
					1721.63	H1N7-AA	0.685652
					1749.63	ND	0.0125107
					1753.64	H1N5F3-AA	0.00661736
					1810.67	H1N6F2-AA	0.0833165
					1867.69	H1N7F1-AA	0.0815259
					1873.65	ND	0.00976255
					1956.73	H1N6F3-AA	0.00824445
					2013.76	H1N7F2-AA	0.00509148
HFn_F08	200	2uM	HF	Neutral	-	-	-
HFn_F09	201	2uM	HF	Neutral	868.199	H2N2-AA	0.352602
	202	6uM			909.233	H1N3-AA	0.512504
					998.245	H1N2F2-AA	0.00605574
					1014.24	H2N2F1-AA	0.017294
					1055.28	H1N3F1-AA	0.0749984
					1112.29	H1N4-AA	0.0278132
					1749.34	H4N1A1-AA	0.00873261
HFn_F10	203	2uM	HF	Neutral	868.194	H2N2-AA	0.0102151
	204	6uM			909.218	H1N3-AA	0.0268265
					1014.26	H2N2F1-AA	0.0166161
					1055.29	H1N3F1-AA	0.0156367
					1071.28	H2N3-AA	0.0336943
					1110.22	H6-AA	0.0144335
					1112.3	H1N4-AA	0.576639
					1114.31	ND	0.070553
					1117.16	ND	0.0278949
					1128.29	ND	0.00815526
					1138.28	ND	0.00514246
					1140.28	ND	0.03721
					1201.33	H1N3F2-AA	0.00921167
					1248.31	ND	0.00958706
					1258.35	H1N4F1-AA	0.062571
					1264.31	ND	0.0369213
					1315.36	H1N5-AA	0.00882424
					1356.39	ND	0.0111584
					1428.3	ND	0.01009
					1522.3	ND	0.00861969
HFn_F11	205	2uM	HF	Neutral	1518.8	H1N5-AA	1
HFa_F01	185	2uM	HF	Acidic	1315.48	H1N5-AA	0.0065707
	186	6uM			1393.47	H2N3A1F1-AA	0.0136966
	187	10uM			1518.56	H1N6-AA	0.0418997
					1596.54	H2N4A1F1-AA	0.0108303
					1694.59	H1A1N6-AA	0.0434038
					1716.54	ND	0.0196243
					1746.61	H2N4A1F2-AA	0.00924484
					1840.64	H6N2-AA	0.0231061
					1855.66	ND	0.0138735
					1862.6	ND	0.00600998
					1881.67	H47N3-AA	0.00760168
					1897.67	H1N7A1-AA	0.421049
					1900.68	H1N5F4-AA	0.0451224
					1904.19	H3N4A1F2-AA	0.0145661
					1912.66	ND	0.00701655
					1919.64	ND	0.0702457
					1935.62	H3N4A2F1-AA	0.0105039
					1956.19	H1N6F3-AA	0.00614711
					1975.53	H2N5A2F1-AA	0.00711778
					1986.71	H1N6A1F2-AA	0.0066626
					2033.68	H2N6A2-AA	0.00587692
					2043.73	H1N7A1F1-AA	0.0793945
					2049.69	ND	0.0165766
					2065.69	H2N4A2F3-AA	0.00753252
					2100.75	H1N8A1-AA	0.00528078
					2189.79	H1N7A1F2-AA	0.00949349
					2213.73	H6N4F2-AA	0.00708045
N_F01	230	2uM	Native	Neutral	868.306	H2N2-AA	0.947974
					909.328	H1N3-AA	0.0336352
					1030.37	H3N2-AA	0.0119204
					1055.4	H1N3F1-AA	0.00647017
N_F02	231	2uM	Native	Neutral	868.354	H2N2-AA	0.0293943
	232	6uM			1014.47	H2N2F1-AA	0.8583
					1071.51	H2N3-AA	0.0110596
					1160.58	H2N2F2-AA	0.0764675
					1201.62	H1N3F2-AA	0.0181502
N_F03	233	2uM	Native	Neutral	1525.69	H3N3F2-AA	0.0345187
	234	6uM			1566.73	H2N4F2-AA	0.0554511
					1580.69	H1A1N4F2-AA	0.00847408
					1607.75	H1N5F2-AA	0.0418278
					1637.72	H1A1N5F1-AA	0.0395836
					1712.79	H2N4F3-AA	0.122445
					1751.82	H6N1F3-AA	0.00877566
					1753.84	H1N5F3-AA	0.507764
					1783.8	H1A1N5F2-AA	0.0351721
					1840.81	H1A1N6F1-AA	0.00510928
					1858.85	H2N4F4-AA	0.0215474
					1899.87	H1N5F4-AA	0.00700013
					1929.85	H1A1N5F3-AA	0.00583664
					2075.92	H1A1N5F4-AA	0.0539505
					2221.98	H1A1N5F5-AA	0.00846077
N_F04	235	2uM	Native	Neutral	1607.92	H1N5F2-AA	0.010172
	236	10uM			1753.99	H1N5F3-AA	0.106113
					1782	H6A1N1F2-AA	0.0144556
					1811.01	H1N6F2-AA	0.0706964
					1900.11	H1N5F4-AA	0.0513669
					1957.11	H1N6F3-AA	0.0373374
					1989.16	H1N4F6-AA	0.00633088
					2046.19	H1N5F5-AA	0.0609592
					2103.18	H1N6F4-AA	0.14604
					2192.25	H1N5F6-AA	0.380356
					2220.29	H6A1N1F5-AA	0.0115177
					2249.25	H1N6F5-AA	0.0404299
					2338.36	H1N5F7-AA	0.0189178
N_F05	237	2uM	Native	Neutral	1753.89	H1N5F3-AA	0.0157015
	238	6uM			1810.92	H1N6F2-AA	0.0165607
					1899.97	H1N5F4-AA	0.0788284
					1957	H1N6F3-AA	0.219756
					1984.99	H6A1N2F2-AA	0.0105717
					2103.07	H1N6F4-AA	0.0561117
					2192.11	H1N5F6-AA	0.020776
					2247.16	H1A1N8F1-AA	0.00573601
					2249.14	H1N6F5-AA	0.246603
					2277.15	H6A1N2F4-AA	0.00880823
					2338.2	H1N5F7-AA	0.10416
					2395.24	H1N6F6-AA	0.166111
					2541.31	H1N6F7-AA	0.007118
N_F06	239	2uM	Native	Neutral	1810.88	H1N6F2-AA	0.00596941
	240	6uM			1956.97	H1N6F3-AA	0.0812771
	241	10uM			2101.09	H1A1N8-AA	0.00927952
	242	20uM			2103.06	H1N6F4-AA	0.816031
					2131.05	H6A1N2F3-AA	0.0148843
					2160.08	H1N7F3-AA	0.014946
					2249.11	H1N6F5-AA	0.00509981
					2306.15	H1N7F4-AA	0.0119332
					2395.21	H1N6F6-AA	0.0130609
N_F07	243	2uM	Native	Neutral	1956.99	H1N6F3-AA	0.0232787
	244	6uM			2103.06	H1N6F4-AA	0.225661
	245	10uM			2131.07	H6A1N2F3-AA	0.0208893
	246	20uM			2160.09	H1N7F3-AA	0.0206893
	247	60uM			2249.12	H1N6F5-AA	0.0449758
					2306.15	H1N7F4-AA	0.0102031
					2338.16	H1N5F7-AA	0.00774196
					2395.18	H1N6F6-AA	0.0727993
					2452.21	H1N7F5-AA	0.00687377
					2541.26	H1N6F7-AA	0.376397
					2569.28	H6A1N2F6-AA	0.0105957
					2598.3	H1N7F6-AA	0.0439265
					2687.34	H1N6F8-AA	0.105847
N_F08	248	2uM	Native	Neutral	1956.89	H1N6F3-AA	0.0106354
	249	6uM			2102.95	H1N6F4-AA	0.11447
	250	10uM			2159.97	H1N7F3-AA	0.0526602
					2249.01	H1N6F5-AA	0.115763
					2306.06	H1N7F4-AA	0.457519
					2395.1	H1N6F6-AA	0.0127698
					2452.12	H1N7F5-AA	0.0154594
					2541.16	H1N6F7-AA	0.0201657
					2598.18	H1N7F6-AA	0.0162774
					2687.24	H1N6F8-AA	0.0898669
					2744.27	H1N7F7-AA	0.0202401
					2774.27	H1A1N7F6-AA	0.00932418
N_F09	251	2uM	Native	Neutral	2103.08	H1N6F4-AA	0.0153827
	252	6uM			2160.1	H1N7F3-AA	0.0122875
	253	10uM			2249.16	H1N6F5-AA	0.0081534
					2306.17	H1N7F4-AA	0.128254
					2334.19	H6A1N3F3-AA	0.0262656
					2395.24	H1N6F6-AA	0.0176122
					2452.25	H1N7F5-AA	0.0142563
					2541.31	H1N6F7-AA	0.1289
					2569.32	H6A1N2F6-AA	0.00525467
					2598.33	H1N7F6-AA	0.066159
					2687.38	H1N6F8-AA	0.0692542
					2744.41	H1N7F7-AA	0.147547
					2772.42	H6A1N3F6-AA	0.00693943
					2801.36	H1N8F6-AA	0.00519631
					2888.39	H1A1N9F4-AA	0.00541031
					2890.5	H1N7F8-AA	0.27371
					2918.53	H6A1N3F7-AA	0.00946074
					3036.55	H1N7F9-AA	0.0153535
N_F10	254	2uM	Native	Neutral	1957.53	H1N6F3-AA	0.0476773
	255	6uM			2102.68	H1N6F4-AA	0.277425
					2249.8	H1N6F5-AA	0.0626732
					2305.72	H1N7F4-AA	0.0193154
					2394.77	H1N6F6-AA	0.103423
					2540.81	H1N6F7-AA	0.378158
					2597.78	H1N7F6-AA	0.0279544
					2686.91	H1N6F8-AA	0.0833741
N_F11	256	2uM	Native	Neutral	2250.12	H1N6F5-AA	0.00866742
					2306.13	H1N7F4-AA	0.00557867
					2395.17	H1N6F6-AA	0.0419188
					2453.27	H1N7F5-AA	0.00690242
					2541.71	H1N6F7-AA	0.18438
					2598.8	H1N7F6-AA	0.0696546
					2687.23	H1N6F8-AA	0.0926626
					2744.27	H1N7F7-AA	0.145928
					2890.63	H1N10F4-AA	0.434002
					3037.52	H1N7F9-AA	0.0103064
N_F12	257	2uM	Native	Neutral	2249.09	H1N6F5-AA	0.0188414
					2267.36	ND	0.0440062
					2304.37	H1N7F4-AA	0.00717521
					2336.13	H1N7A1F3-AA	0.0175509
					2382.33	ND	0.00513621
					2482.18	H1N7A1F4-AA	0.156796
					2559.16	H2N5A2F5-AA	0.0268425
					2628.26	H1N7A1F5-AA	0.0298107
					2704.9	H2N6F7-AA	0.091884
					2740.22	ND	0.0298107
					2774.31	H1N7A1F6-AA	0.0843991
					2920.39	H1N7A1F7-AA	0.469486
					3066.48	H1N7A1F8-AA	0.0161313
N_F13	258	2uM	Native	Neutral	1014.26	H2N2F1-AA	0.00528312
	259	10uM			1055.3	H1N3F1-AA	0.0410135
					1075.18	ND	0.00876091
					1112.31	H1N4-AA	0.0100115
					1160.33	H2N2F2-AA	0.078506
					1201.36	H1N3F2-AA	0.432504
					1217.34	H2N3F1-AA	0.0439997
					1229.39	ND	0.0145107
					1258.37	H1N4F1-AA	0.144305
					1274.35	H2N4-AA	0.00548657
					1306.36	H2N2F3-AA	0.00902249
					1312.34	H4N1A1F1-AA	0.0050971
					1315.37	H1N5-AA	0.00871025
					1337.34	H2N2A1F2-AA	0.00606786
					1347.39	H1N3F3-AA-AA	0.0825103
					1353.35	H3N2A1F1-AA	0.0188189
					1404.4	H1N4F2-AA	0.041442
					1410.36	H3N3A1-AA	0.00545252
					1493.42	H1N3F4-AA	0.0163335
					1611.35	ND	0.00827927
N_F14	260	2uM	Native	Neutral	1055.62	H1N3F1-AA	0.0111325
	261	10uM			1112.64	H1N4-AA	0.00618645
					1258.74	H1N4F1-AA	0.0961067
					1362.79	H2N3F2-AA	0.00899181
					1404.83	H1N4F2-AA	0.623338
					1432.83	ND	0.0389838
					1461.86	H1N5F1-AA	0.0137889
					1540.87	H2N3A1F2-AA	0.00959422
					1550.92	H1N4F3-AA	0.142084
					1607.96	H1N5F2-AA	0.00982319
					1697.01	H1N4F4-AA	0.0290805
					1814.99	H3A1N5-AA/H1A1N3F5-AA	0.00639763
N_F15	262	2uM	Native	Neutral	1257.46	H1N4F1-AA	0.0342569
					1420.57	H2N4F1-AA	0.0258244
					1461.6	H1N5F1-AA	0.0792049
					1566.65	H2N4F2-AA	0.120464
					1607.67	H1N5F2-AA	0.587261
					1696.7	H1N4F4-AA	0.0266526
					1712.72	H2N4F3-AA	0.0319982
					1842.79	H1N4F5-AA	0.0187472
					1988.82	H1N4F6-AA	0.0569944
					2017.8	H1N4A1F5-AA	0.0185966
N_F16	263	2uM	Native	Neutral	1201.73	H1N3F2-AA	0.00537587
	264	10uM			1404.85	H1N4F2-AA	0.00550723
					1607.98	H1N5F2-AA	0.00848345
					1665.01	H1N6F1-AA	0.00660634
					1697.04	H1N4F4-AA	0.0113619
					1715.87	H2N3A2F2-AA	0.00564298
					1754.07	H1N5F3-AA	0.0192921
					1811.11	H1N6F2-AA	0.0436039
					1900.16	H1N5F4-AA	0.0660416
					1918.64	H2N4A2F2-AA	0.00613488
					1957.2	H1N6F3-AA	0.062464
					2046.25	H1N5F5-AA	0.0969057
					2103.29	H1N6F4-AA	0.147961
					2192.34	H1N5F6-AA	0.376477
					2220.33	H1N7A2F1-AA	0.00609985
					2249.38	H1N6F5-AA	0.0581405
					2338.43	H1N5F7-AA	0.029749
N_F17	265	2uM	Native	Neutral	1055.53	H1N3F1-AA	0.00910374
	266	6uM			1550.78	H1N4F3-AA	0.00686586
	267	10uM			1606.77	H1N5F2-AA	0.00648962
	268	20uM			1664.91	H1N6F1-AA	0.00993452
					1753.98	H1N5F3-AA	0.0542658
					1811.05	H1N6F2-AA	0.0892432
					1900.03	H1N5F4-AA	0.22218
					1915.04	H2N5F3-AA	0.00677887
					1929.11	H1N5A1F3-AA	0.00528478
					1957.02	H1N6F3-AA	0.383044
					1985.2	H1N6A1F2-AA	0.0118114
					2014.21	H1N7F2-AA	0.0084078
					2036.13	ND	0.0117374
					2046.24	H1N5F5-AA	0.0105913
					2103.29	H1N6F4-AA	0.0202801
					2192	H1N5F6-AA	0.00739652
					2249.03	H1N6F5-AA	0.0357473
					2338.04	H1N5F7-AA	0.0115308
					2395.06	H1N6F6-AA	0.0209129
N_F18	269	2uM	Native	Neutral	1810.79	H1N6F2-AA	0.00941547
	270	6uM			1899.84	H1N5F4-AA	0.00721796
	271	10uM			1956.85	H1N6F3-AA	0.0556473
	272	20uM			2045.9	H1N5F5-AA	0.0176953
					2102.93	H1N6F4-AA	0.0816085
					2159.92	H1N7F3-AA	0.00518156
					2191.96	H1N5F6-AA	0.0250788
					2246.95	H1N8A1F1-AA	0.00742426
					2248.98	H1N6F5-AA	0.30013
					2276.95	H1N6A1F4-AA	0.00612024
					2338.01	H1N5F7-AA	0.151577
					2392.97	H1N8A1F2-AA	0.0060271
					2395.04	H1N6F6-AA	0.206849
					2400.96	ND	0.0132216
					2541.08	H1N6F7-AA	0.0128269
N_F19	273	2uM	Native	Neutral	1055.5	H1N3F1-AA	0.00949564
	274	60uM			1404.66	H1N4F2-AA	0.00940168
					1810.86	H1N6F2-AA	0.011294
					1956.93	H1N6F3-AA	0.0969051
					1984.91	ND	0.00619763
					2013.96	H1N7F2-AA	0.00698502
					2103.01	H1N6F4-AA	0.469471
					2131.01	H1N6A1F3-AA	0.0237795
					2160.04	H1N7F3-AA	0.0463977
					2239.03	H2N3F8-AA	0.00515467
					2249.08	H1N6F5-AA	0.0192976
					2255.03	ND	0.00990531
					2395.14	H1N6F6-AA	0.0366013
					2452.16	H1N7F5-AA	0.00730448
					2541.21	H1N6F7-AA	0.119119
					2598.23	H1N7F6-AA	0.0225674
					2687.26	H1N6F8-AA	0.0213741
N_F20	275	2uM	Native	Neutral	1055.59	H1N3F1-AA	0.00641409
	276	6uM			1550.89	H1N4F3-AA	0.00592313
	277	10uM			1957.15	H1N6F3-AA	0.00822208
	278	20uM			2046.22	H1N5F5-AA	0.0105866
					2064.54	ND	0.0056548
					2103.25	H1N6F4-AA	0.0315982
					2160.29	H1N7F3-AA	0.00709487
					2249.35	H1N6F5-AA	0.048729
					2267.44	ND	0.00508651
					2306.38	H1N7F4-AA	0.0198492
					2395.45	H1N6F6-AA	0.10539
					2452.48	H1N7F5-AA	0.017528
					2541.52	H1N6F7-AA	0.375154
					2555.36	ND	0.00672694
					2569.53	H1N8A2F2-AA	0.0138242
					2598.56	H1N7F6-AA	0.0651486
					2677.59	ND	0.00601804
					2687.6	H1N6F8-AA	0.154724
					2693.55	ND	0.0143057
					2744.63	H1N7F7-AA	0.00812482
					2833.67	H1N6F9-AA	0.00541108
N_F21	279	2uM	Native	Neutral	909.505	H1N3-AA	0.0202511
	280	6uM			1258.71	H1N4F1-AA	0.0111875
					1607.91	H1N5F2-AA	0.0083908
					1829.67	H2N5A2-AA	0.00520888
					1957.12	H1N6F3-AA	0.0134309
					2014.16	H1N7F2-AA	0.0181341
					2032.55	H2N6A2-AA	0.00501141
					2103.21	H1N6F4-AA	0.0241736
					2160.25	H1N7F3-AA	0.117395
					2249.3	H1N6F5-AA	0.046059
					2264.3	H2N6F4-AA	0.0102909
					2304.29	H1N7F4-AA	0.0199624
					2306.33	H1N7F4-AA	0.528924
					2334.32	ND	0.0064844
					2382.88	ND	0.011292
					2395.38	H1N6F6-AA	0.00566352
					2442.37	ND	0.00663538
					2452.41	H1N7F5-AA	0.00876393
					2458.3	H1N4A1F8-AA	0.00777371
					2541.46	H1N6F7-AA	0.0128339
					2598.5	H1N7F6-AA	0.0109872
					2687.54	H1N6F8-AA	0.0123414
					2716.48	H1N6A1F7-AA	0.00778691
					2744.57	H1N7F7-AA	0.0118661
					2890.63	H1N10F4-AA	0.0106766
N_F22	281	2uM	Native	Neutral	909.423	H1N3-AA	0.0228979
					1075.32	ND	0.0203163
					1131.39	ND	0.0102351
					1258.6	H1N4F1-AA	0.00823037
					1404.67	H1N4F2-AA	0.00866305
					1840.83	H1N6A1F1-AA	0.00667276
					2014.05	H1N7F2-AA	0.0107543
					2103.02	H1N6F4-AA	0.00780732
					2160.07	H1N7F3-AA	0.0565934
					2249.12	H1N6F5-AA	0.0117062
					2306.15	H1N7F4-AA	0.266353
					2334.13	H1N7A1F3-AA	0.0271573
					2395.2	H1N6F6-AA	0.0137349
					2452.24	H1N7F5-AA	0.00882169
					2541.24	H1N6F7-AA	0.0168982
					2598.27	H1N7F6-AA	0.0735878
					2687.31	H1N6F8-AA	0.0117639
					2744.32	H1N7F7-AA	0.130523
					2801.31	H1N8F6-AA	0.00997548
					2890.37	H1N6F8-AA	0.209701
					2896.26	ND	0.0115523
					3036.4	H1N7F9-AA	0.0224124
N_F23	282	2uM	Native	Neutral	909.523	H1N3-AA	0.0242532
	283	6uM			1075.37	ND	0.00617462
					1258.73	H1N4F1-AA	0.00540545
					1404.8	H1N4F2-AA	0.0112285
					1900.14	H1N5F4-AA	0.00871861
					2103.27	H1N6F4-AA	0.00968806
					2160.29	H1N7F3-AA	0.00808155
					2249.34	ND	0.0157135
					2306.35	H1N7F4-AA	0.0294477
					2395.4	H1N6F6-AA	0.0215089
					2452.4	H1N7F5-AA	0.0369433
					2509.38	H1N8F4-AA	0.00947712
					2541.47	H1N6F7-AA	0.0290003
					2598.47	H1N7F6-AA	0.0982953
					2687.49	H1N6F8-AA	0.0649187
					2744.51	H1N7F7-AA	0.201382
					2801.49	H1N8F6-AA	0.00662206
					2833.53	H1N6F9-AA	0.0146674
					2890.55	H1N7F8-AA	0.303008
					2918.54	H1N9A2F3-AA	0.0075425
					3036.55	H1N7F9-AA	0.0346678
N_F24	284	2uM	Native	Neutral	1055.69	H1N3F1-AA	0.0147706
					1201.78	H1N3F2-AA	0.00684962
					1404.93	H1N4F2-AA	0.0125969
					1551.02	H1N4F3-AA	0.0104085
					1754.15	H1N5F3-AA	0.00555574
					1900.27	H1N5F4-AA	0.00729762
					1957.3	H1N6F3-AA	0.00755109
					2003.27	H2N6A1F1-AA	0.00970559
					2046.36	H1N5F5-AA	0.00528753
					2103.41	H1N6F4-AA	0.0132616
					2160.45	H1N7F3-AA	0.00826877
					2249.52	H1N6F5-AA	0.00965991
					2306.56	H1N7F4-AA	0.0346755
					2395.62	H1N6F6-AA	0.0117393
					2452.66	H1N7F5-AA	0.118622
					2509.68	H1N8F4-AA	0.00686878
					2541.72	H1N6F7-AA	0.0141119
					2598.75	H1N7F6-AA	0.0382403
					2655.78	H1N8F5-AA	0.010693
					2687.81	H1N6F8-AA	0.00656815
					2744.85	H1N7F7-AA	0.0693347
					2801.86	H1N8F6-AA	0.00872266
					2890.92	H1N7F8-AA	0.192046
					2918.9	H1N7A1F7-AA	0.00590942
					2947.95	H1N8F7-AA	0.0161544
					3037.01	H1N7F9-AA	0.185289
					3043.11	-AA	0.0086755
					3094.02	H1N8F8-AA	0.0215834
					3183.07	H1N7F10-AA	0.0584708
					3240.08	H1N8F9-AA	0.0101226
					3386.1	H1N8F10-AA	0.00615994
N_F25	285	2uM	Native	Neutral	1753.91	H1N5F3-AA	0.010393
					1810.93	H1N6F2-AA	0.00965066
					1899.97	H1N5F4-AA	0.0372926
					1957	H1N6F3-AA	0.115677
					2046.03	H1N5F5-AA	0.0126201
					2103.05	H1N6F4-AA	0.0638428
					2192.1	H1N5F6-AA	0.0312664
					2249.11	H1N6F5-AA	0.321878
					2338.16	H1N5F7-AA	0.141616
					2395.18	H1N6F6-AA	0.244367
					2541.22	H1N6F7-AA	0.0113974
A_F01	206	2uM	Native	Acidic	1956.84	H1N6F3-AA	0.0124639
					1984.86	H6A1N2F2-AA	0.0401167
					2013.83	H1N7F2-AA	0.00662451
					2102.92	H1N6F4-AA	0.0800013
					2130.93	H6A1N2F3-AA	0.306693
					2159.91	H1N7F3-AA	0.0496408
					2187.94	H6A1N3F2-AA	0.0200139
					2248.96	H1N6F5-AA	0.0118823
					2276.98	H6A1N2F4-AA	0.0275066
					2305.96	H1N7F4-AA	0.00943821
					2333.99	H6A1N3F3-AA	0.00598269
					2366.01	H8A1N3F1-AA	0.0051317
					2395.03	H1N6F6-AA	0.0141659
					2423.04	H6A1N2F5-AA	0.051615
					2480.03	H6A1N3F4-AA	0.005487
					2541.11	H1N6F7-AA	0.0506294
					2480.03	H6A1N3F4-AA	0.005487
					2569.12	H6A1N2F6-AA	0.176567
					2598.11	H1N7F6-AA	0.0340509
					2626.15	H6A1N3F5-AA	0.0156272
					2687.18	H1N6F8-AA	0.00971614
					2715.2	H8A1N4F2-AA	0.0327615
					2687.18	H1N6F8-AA	0.00971614
					2715.2	H8A1N4F2-AA	0.0327615
A_F02	207	2uM	Native	Acidic	1929.86	H1A1N5F3-AA	0.0112813
	208	6uM			1986.89	H8N2F1-AA	0.0382956
					2075.91	H1A1N5F4-AA	0.00532566
					2132.98	H8N2F2-AA	0.2282
					2159.96	H1N7F3-AA	0.00896652
					2190	H8N3F1-AA	0.0510498
					2222.01	H1A1N5F5-AA	0.0198463
					2279.04	H1A1N6F4-AA	0.0470871
					2425.14	H1A1N6F5-AA	0.23931
					2482.16	H1A1N7F4-AA	0.0491015
					2569.21	H6A1N2F6-AA	0.005279
					2571.24	H1A1N6F6-AA	0.190575
A_F03	209	2uM	Native	Acidic	1753.79	H1N5F3-AA	0.00523352
	210	6uM			1986.85	H1A1N6F2-AA	0.00659496
	211	10uM			2132.93	H1A1N6F3-AA	0.083547
					2189.94	H1A1N7F2-AA	0.0178009
					2277.01	H6A1N2F4-AA	0.0116957
					2279.01	H1A1N6F4-AA	0.325968
					2336.04	H1A1N7F3-AA	0.217852
					2425.07	H1A1N6F5-AA	0.0295054
					2482.1	H1A1N7F4-AA	0.0112833
					2571.16	H1A1N6F6-AA	0.208869
A_F04	212	2uM	Native	Acidic	1753.98	H1N5F3-AA	0.00573799
	213	6uM			1957.13	H1N6F3-AA	0.0115381
	214	10uM			1978.08	H2A1N3F5-AA	0.0101087
	215	20uM			2181.18	H2A1N4F5-AA	0.0083624
					2190.16	H1A1N7F2-AA	0.00722878
					2279.26	H1A1N6F4-AA	0.0213087
					2336.27	H1A1N7F3-AA	0.115415
					2425.34	H8N2F4-AA	0.00683561
					2480.32	H6A1N3F4-AA	0.0157302
					2482.4	H1A1N7F4-AA	0.681324
					2571.46	H1A1N6F6-AA	0.00619256
					2628.46	H1A1N7F5-AA	0.0101532
					2774.55	H1A1N7F6-AA	0.0216687
					2920.65	H1A1N7F7-AA	0.0306649
A_F05	216	2uM	Native	Acidic	1055.46	H1N3F1-AA	0.00538644
	217	6uM			1404.64	H1N4F2-AA	0.00520926
	218	10uM			1753.76	H1N5F3-AA	0.00644956
					1956.83	H1N6F3-AA	0.0199511
					1977.81	H2A1N3F5-AA	0.00531557
					2102.87	H1N6F4-AA	0.00914278
					2159.9	H1N7F3-AA	0.0116234
					2180.86	H2A1N4F5-AA	0.00570538
					2248.94	H1N6F5-AA	0.0216166
					2305.94	H1N7F4-AA	0.00556363
					2335.93	H1A1N7F3-AA	0.013218
					2452	H1N7F5-AA	0.0110564
					2482.01	H1A1N7F4-AA	0.125837
					2539.01	H1A1N8F3-AA	0.0141394
					2598.07	H1N7F6-AA	0.00843403
					2619.06	H2A1N4F8-AA	0.00506751
					2628.08	H1A1N7F5-AA	0.101705
					2685.1	H1A1N8F4-AA	0.117935
					2774.14	H1A1N7F6-AA	0.0326021
					2831.16	H1A1N8F5-AA	0.0395124
					2920.23	H1A1N7F7-AA	0.117403
					2948.2	H15A1N1-AA	0.00694567
					2977.25	H1A1N8F6-AA	0.0256565
					3066.3	H1A1N7F8-AA	0.046777
					3123.34	H1A1N8F7-AA	0.0657713
					3212.39	H1A1N7F9-AA	0.0833127
					3269.42	H1A1N8F8-AA	0.0266133
					3358.48	H1A1N7F10-AA	0.00556363
					3415.51	H1A1N8F9-AA	0.0125447
A_F06	219	2uM	Native	Acidic	2248.97	H1N6F5-AA	0.0141579
	220	6uM			2335.96	H1A1N7F3-AA	0.0297156
					2416.01	H2A1N3F8-AA	0.0051915
					2482.03	H1A1N7F4-AA	0.170853
					2539.04	H1A1N8F3-AA	0.00676366
					2628.1	H1A1N7F5-AA	0.0485395
					2703.47	H2N6F7-AA	0.0221028
					2772.15	H6A1N3F6-AA	0.0065745
					2774.17	H1A1N7F6-AA	0.12022
					2918.28	H6A1N3F7-AA	0.0178865
					2920.26	H1A1N7F7-AA	0.427918
					2948.27	H15A1N1-AA	0.0101182
					2977.27	H1A1N8F6-AA	0.00774732
					3066.33	H1A1N7F8-AA	0.0189248
A_F07	221	2uM	Native	Acidic	1607.53	H1N5F2-AA	0.00769673
	222	6uM			1628.47	H2N2A1F4-AA	0.00695162
					1753.57	H1N5F3-AA	0.00814837
					1783.51	H1N5A1F2-AA	0.00563083
					1831.52	H2N3A1F4-AA	0.00753968
					1899.63	H1N5F4-AA	0.00696978
					1920.55	H4N4A1F1-AA	0.00890145
					1929.55	H1N5A1F3-AA	0.00795776
					1945.55	H2N5A1F2-AA	0.00516765
					1977.57	H4N5A1-AA	0.00515224
					1986.58	H1N2A1F2-AA	0.037587
					2043.59	H1N7A1F1-AA	0.00602415
					2066.6	H4N4A1F2-AA	0.00674864
					2075.6	H1N5A1F4-AA	0.00683638
					2090.62	ND	0.00289958
					2123.62	H4N5A1F1-AA	0.00827131
					2132.63	H1N6A1F3-AA	0.0646041
					2189.65	H1N7A1F2-AA	0.0625041
					2208.17	H2N5F5-AA	0.0100594
					2221.65	H1N5A1F5-AA	0.00907914
					2243.6	H4N4A2F2-AA	0.00621559
					2269.67	H4N5A1F2-AA	0.00827186
					2278.68	H1N6A1F4-AA	0.0599513
					2335.7	H1N7A1F3-AA	0.0148007
					2389.39	H4N4A2F3-AA	0.00598262
					2421.66	H1N8A2F1-AA	0.00952197
					2424.74	H1N6A1F5-AA	0.210952
					2481.76	H1N7A1F4-AA	0.0702314
					2500.72	H2N5F7-AA	0.00538659
					2567.72	H1N8A2F2-AA	0.00690239
					2570.79	H1N6A1F6-AA	0.175384
					2627.8	H1N7A1F5-AA	0.00881481
					2716.84	H1N6A1F7-AA	0.0113574
A_F08	223	2uM	Native	Acidic	1956.86	H1N6F3-AA	0.0157683
					2102.93	H1N6F4-AA	0.0621432
					2132.88	H1N6A1F3-AA	0.00901417
					2159.94	H1N7F3-AA	0.0298325
					2189.92	H1N7A1F2-AA	0.00875829
					2249	H1N6F5-AA	0.0696806
					2278.98	H1N6A1F4-AA	0.0102663
					2306.03	H1N7F4-AA	0.14726
					2395.07	H1N6F6-AA	0.0670192
					2425.04	H1N6A1F5-AA	0.0150708
					2452.08	H1N7F5-AA	0.0265788
					2482.06	H1N7A1F4-AA	0.0107404
					2538.02	H1N8A1F3-AA	0.00634239
					2541.14	H1N6F7-AA	0.21229
					2571.09	H1N6A1F6-AA	0.0207871
					2598.17	H1N7F6-AA	0.0528108
					2687.21	H1N6F8-AA	0.130624
					2744.22	H1N7F7-AA	0.0348266
					2774.11	H1N7A1F6-AA	0.00965711
					2833.22	H1N6F9-AA	0.00689311
					2890.26	H1N7F8-AA	0.023155
A_F09	224	2uM	Native	Acidic	1753.57	H1N5F3-AA	0.00622592
	225	6uM			1774.49	H4N4A1-AA	0.00507797
					1810.64	H1N6F2-AA	0.00851639
					1831.52	H2N3A1F4-AA	0.0070054
					1899.61	H1N5F4-AA	0.00811714
					1956.64	H1N6F3-AA	0.00599868
					1977.56	H4N5A1-AA	0.00657266
					1986.54	H1N2A1F2-AA	0.00607745
					2034.59	H2N4A1F4-AA	0.00592535
					2066.6	H4N4A1F2-AA	0.00747436
					2102.74	H1N6F4-AA	0.0146355
					2123.62	H4N5A1F1-AA	0.00577597
					2132.61	H1N6A1F3-AA	0.0200602
					2189.63	H1N7A1F2-AA	0.00830545
					2269.68	H4N5A1F2-AA	0.0113111
					2278.64	H1N6A1F4-AA	0.0860665
					2306.64	H1N7F4-AA	0.00781567
					2335.68	H1N7A1F3-AA	0.187248
					2363.67	H1N8F3-AA	0.0151352
					2392.65	H1N8A1F2-AA	0.00732679
					2424.69	H1N6A1F5-AA	0.0238182
					2472.74	H4N6A1F2-AA	0.00871013
					2481.74	H1N7A1F4-AA	0.0555652
					2570.75	H1N6A1F6-AA	0.0840838
					2598.73	H1N7F6-AA	0.00674014
					2627.79	H1N7A1F5-AA	0.111466
					2684.73	H1N8A1F4-AA	0.00759386
					2716.79	H1N6A1F7-AA	0.0564886
					2770.72	H1N10F3-AA	0.00634995
					2773.89	H1N7A1F6-AA	0.075036
					2801.83	H1N8F6-AA	0.014937
					2862.85	H1N8A1F8-AA	0.00901703
					2919.87	H1N7A1F7-AA	0.0496752
					2925.88	ND	0.00599687
A_F10	226	2uM	Native	Acidic	1956.6	H1N6F3-AA	0.0171494
	227	6uM			1977.58	H4N5A1-AA	0.00813088
	228	10uM			2102.65	H1N6F4-AA	0.0137835
					2180.67	H4N6A1-AA	0.0065094
					2189.67	H1N7A1F2-AA	0.00705801
					2212.67	H1N6F5-AA	0.00584907
					2248.71	H1N6F5-AA	0.0242844
					2269.71	H4N5A1F2-AA	0.00688934
					2278.7	H1N6A1F4-AA	0.00801655
					2335.72	H1N7A1F3-AA	0.0501551
					2415.76	H4N5A1F3-AA	0.00939677
					2424.73	H1N6A1F5-AA	0.00896423
					2472.79	H4N6A1F2-AA	0.00549652
					2481.78	H1N7A1F4-AA	0.181155
					2509.78	H1N8F4-AA	0.0169677
					2538.79	H1N8A1F3-AA	0.011303
					2570.8	H1N6A1F6-AA	0.009292
					2618.83	H4N6A1F3-AA	0.00929243
					2627.84	H1N7A1F5-AA	0.053934
					2684.84	H1N8A1F4-AA	0.00554477
					2702.49	H2N8A1F3-AA	0.00738926
					2716.83	H1N6A1F7-AA	0.0114664
					2738.05	H1N12-AA	0.00758401
					2769.78	H1N10F3-AA	0.00633421
					2773.89	H1N7A1F6-AA	0.128359
					2801.87	H1N8F6-AA	0.00852734
					2830.88	H1N8A1F5-AA	0.00691064
					2915.79	H1N10F4-AA	0.00807741
					2919.93	H1N7A1F7-AA	0.213898
					2947.9	H1N8F7-AA	0.0158883
					2976.93	H1N8A1F6-AA	0.0125902
					3065.91	H1N7A1F8-AA	0.00724059
A_F11	229	2uM	Native	Acidic	2335.59	H1N7A1F3-AA	0.00741473
					2481.69	H1N7A1F4-AA	0.0646455
					2538.73	H1N8A1F3-AA	0.0111908
					2627.73	H1N7A1F5-AA	0.112512
					2684.74	H1N8A1F4-AA	0.135539
					2773.76	H1N7A1F6-AA	0.0486901
					2830.79	H1N8A1F5-AA	0.0133191
					2919.78	H1N7A1F7-AA	0.0914895
					2976.82	H1N8A1F6-AA	0.0681881
					3065.84	H1N7A1F8-AA	0.0911463
					3122.84	H1N8A1F7-AA	0.149503
					3151.13	H1N9F7-AA	0.00343275
					3211.86	H1N7A1F9-AA	0.128495
					3268.87	H1N8A1F8-AA	0.0548141
					3358.81	H1N7A1F10-AA	0.00670072
					3416.05	H1N8A1F9-AA	0.0129209

## Sheet: GSL_Smw
Glycan class = GSL glycan
Species = S. mansoni
Life-stage = worms
(1) ID code used for statistical analysis
(2) Printing concentration on array in µM
(3) m/z of AA-labeled glycans, observed in negative-ion mode in the MALDI-TOF-MS spectrum of the fraction [M-H]-
(4) Glycan compostion A = Hexuronic acid; F = Fucose; H = Hexose; N= N-acetylhexosamine; -AA = AA label; ND = Not determined
(5) Percentage of the area of ion species in the MALDI-TOF-MS spectrum compared to the total spectrum area. Only ion species with area > 1% are included in this table.
Fraction info.			Fraction content
ID#	Array ID#1	Printing conc.2	Observed masses3	Glycan composition4	%Fraction5
F01	286	2uM	1055.43	H1N3F1-AA	0.00686744
			1201.51	H1N3F2-AA	0.00570942
			1217.49	H2N3F1-AA	0.00263481
			1258.53	H1N4F1-AA	0.0565091
			1404.59	H1N4F2-AA	0.710587
			1432.59	ND	0.0100066
			1461.61	H1N5F1-AA	0.00811827
			1540.61	H2N3A1F2-AA	0.00737585
			1550.65	H1N4F3-AA	0.108818
			1556.61	H3N3A1F1-AA	0.0130893
			1696.71	H1N4F4-AA	0.0494884
F02	287	2uM	1379.53	H3N3F1-AA	0.00886897
			1404.56	H1N4F2-AA	0.056481
			1420.56	H2N4F1-AA	0.0198478
			1461.58	H1N5F1-AA	0.0417771
			1550.62	H1N4F3-AA	0.0492189
			1566.62	H2N4F2-AA	0.00726702
			1607.64	H1N5F2-AA	0.026527
			1655.68	H2N3F4-AA	0.00595816
			1696.68	H1N4F4-AA	0.727658
			1749.57	ND	0.0054536
			1832.7	H2N3A1F4-AA	0.00657429
			1842.73	H1N4F5-AA	0.0334876
			1849.7	H5N3F2-AA	0.0108806
F03	288	2uM	1258.5	H1N4F1-AA	0.016467
			1288.48	H1N4A1-AA	0.06104
			1313.49	H6N1-AA	0.0181712
			1392.53	ND	0.00924849
			1434.53	H1N4A1F1-AA	0.806055
			1450.54	H2N4A1-AA	0.0118893
			1456.48	ND	0.00901582
			1462.52	H1N5F1-AA	0.013611
			1488.44	ND	0.00736389
			1491.55	H1N5A1-AA	0.0139832
			1570.55	ND	0.00869591
			1586.56	ND	0.0145475
			1637.62	H1N5A1F1-AA	0.00686947
