# Supplementary material for: Major human schistosome species express different glycans with immunological and diagnostic implications.
Source: Research Square preprint supplement (doi:10.21203/rs.3.rs-7103573/v1), 2025-07-30
Supplement: Supplementary file 7 [file 601c29512fb8c0118c20a445.xlsx]

## Sheet: Key
Raw MALDI-TOF-MS data
Species	Glycan class	Tab ID
S. haematobium	GSL glycans	(A) Sh GSL glycans
S. mansoni	GSL glycans	(B) Sm GSL glycans
S. haematobium	N-glycans	(C) Sh N-glycans
S. mansoni	N-glycans	(D) Sm N-glycans
S. haematobium	O-glycans	(E) Sh O-glycans
Column description
m/z	Experimental monoisotopic masses measured by MALDI-TOF-MS in negative-ion mode (m/z [M-H]-) (A-D) and negative-ion mode (m/z [M+Na]+) (E)
S/N	Signal-to-noise ratio
Res.	Resolution
Intens.	Peak intensity
%Intens.	Peak intensity in percentage of the total spectrum intensity
Area	Peak area
Suggested glycan composition	Suggested glycan composition were otained using the GlycoPeakfinder® tool of the GlycoWorkBench
	Search parameters included 0-15 deoxyhexoses (dHex), 0-5 hexuronic acids (HexA), 0-20 hexoses (Hex), 0-20 N-acetylhexosamines (HexNAc) and 0-1 pentose (Pen)
Accuracy (PPM)	Mass accuracy in parts per million (ppm)
Th. m/z	Th. m/z = Theoretical monoisotopic masses
Deviation	m/z (experimental) - Th. m/z

## Sheet: (A) Sh GSL glycans
Cercariae - biological replicate #1 - Fig. 1 and S1-A.1										Cercariae - biological replicate #2 - Fig. S1-A.1											Adult worms - biological replicate #1 - Fig. 1 and S1-A.2										Adult worms - biological replicate #2 - Fig. S1-A.2											Eggs - biological replicate #1 - Fig. 1 and S1-A.3
m/z	S/N	Res.	Intens.	%Intens.	Area	Suggested glycan composition	Accuracy (PPM)	Th. m/z	Deviation	m/z	S/N	Res.	Intens.	%Intens.	Area	Suggested glycan composition	Accuracy (PPM)	Th. m/z	Deviation		m/z	S/N	Res.	Intens.	%Intens.	Area	Suggested glycan composition	Accuracy (PPM)	Th. m/z	Deviation	m/z	S/N	Res.	Intens.	%Intens.	Area	Suggested glycan composition	Accuracy (PPM)	Th. m/z	Deviation		m/z	S/N	Res.	Intens.	%Intens.	Area	Suggested glycan composition	Accuracy (PPM)
789.09	99	5903	60558	0.039399	14505	null				990.076	77	4694	5763	0.0386681	1462	null					884.384	6	1869	5438	0.0121428	3123	null				884.398	10	1817	3174	0.0409638	1801	null					827.33	14	4643	2387	0.00144947	492	Hex3HexNAc1-AA	-43.6405
837.996	10	7146	6343	0.00412675	1310	null				1030.36	7	4640	486	0.00326092	136	Hex3HexNAc2-AA	17.7293	1030.37	0.0182675		989.398	34	4891	24677	0.0551028	5588	Hex4HexNAc1-AA	-51.8312	989.347	-0.0512816	989.514	23	4325	6265	0.0808563	1930	Hex4HexNAc1-AA	-169.054	989.347	-0.167282		973.418	55	5446	7468	0.00453484	1477	Hex3HexNAc1dHex1-AA	-68.0039
838.99	8	6844	5372	0.00349502	1159	null				1135.4	144	5210	8733	0.0585959	2110	Hex4HexNAc1dHex1-AA	6.71762	1135.4	0.00762716		1030.42	44	4967	30535	0.0681834	7013	Hex3HexNAc2-AA	-47.2938	1030.37	-0.0487325	991.245	12	4242	3424	0.0441903	1117	null					987.401	53	5345	7355	0.00446622	1614	null
989.332	55	7613	25388	0.0165174	3872	Hex4HexNAc1-AA	14.8771	989.347	-0.0147184	1143.08	5	4652	283	0.00189885	105	null					1058.39	72	4910	47975	0.107126	11933	null				1030.54	20	4601	4969	0.0641301	1382	Hex3HexNAc2-AA	-159.851	1030.37	-0.164733		989.408	21	5839	3505	0.00212836	685	Hex4HexNAc1-AA	-61.9377
1030.36	25	8352	11392	0.00741163	2795	Hex3HexNAc2-AA	14.8176	1030.37	-0.0152675	1151.39	26	5259	1506	0.0101048	392	Hex5HexNAc1-AA	6.55015	1151.4	0.00754179		1076.4	24	4936	15697	0.0350508	4012	null				1058.53	11	3631	2662	0.0343559	922	null					1003.4	13	5782	2315	0.00140575	414	Hex3HexA1HexNAc1-AA	-76.7559
1119.4	9	8935	4237	0.00275659	536	Hex3HexNAc1dHex2-AA	5.99654	1119.41	-0.00671254	1165.04	45	4844	2672	0.0179283	721	null					1110.42	4	4891	2306	0.00514921	654	null				1076.52	41	4493	9174	0.1184	2561	null					1005.43	43	5527	5999	0.00364281	1292	null
1135.39	285	8433	107939	0.0702251	33130	Hex4HexNAc1dHex1-AA	16.406	1135.4	-0.0186272	1176.42	47	5310	2626	0.0176197	657	Hex3HexNAc2dHex1-AA	6.95011	1176.43	0.00817626		1116.42	4	5081	2691	0.0060089	702	null				1098.48	7	4872	1424	0.0183782	390	null					1014.45	40	5522	5639	0.0034242	1299	null
1146.09	14	7385	5844	0.0038021	1833	null				1181.03	6	4809	339	0.00227459	102	null					1134.43	41	5044	25122	0.0560964	6462	null				1104.6	9	3010	1846	0.0238246	776	null					1030.44	56	5353	7880	0.00478502	1785	Hex3HexNAc2-AA	-69.6132
1151.38	81	8991	30538	0.019868	8774	Hex5HexNAc1-AA	16.9725	1151.4	-0.0195418	1281.45	6	5100	258	0.00173111	78.6	Hex4HexNAc1dHex2-AA	5.88079	1281.46	0.00753597		1135.47	53	5761	15279	0.0341174	6337	Hex4HexNAc1dHex1-AA				1114.44	9	5320	1851	0.0238891	435	null					1135.45	9	5572	1690	0.00102623	347	Hex4HexNAc1dHex1-AA	-43.4829
1176.41	118	8858	42966	0.0279537	13104	Hex3HexNAc2dHex1-AA	18.8508	1176.43	-0.0221763	1313.44	5	5329	210	0.00140904	65.2	Hex6HexNAc1-AA	5.60756	1313.45	0.00736522		1176.48	46	5404	25942	0.0579275	6278	Hex3HexNAc2dHex1-AA	-38.95	1176.43	-0.0458237	1134.55	29	4809	5830	0.0752422	1630	null					1160.51	5	6330	1093	0.000663709	161	null
1187.11	5	7677	2795	0.00181843	537	null				1322.49	576	5484	25194	0.169044	6776	Hex3HexNAc2dHex2-AA	2.33278	1322.49	0.00308507		1192.47	15	5403	7917	0.0176783	2137	Hex4HexNAc2-AA	-38.4991	1192.43	-0.0459091	1135.56	35	4725	6845	0.0883418	2003	Hex4HexNAc1dHex1-AA					1176.5	74	5541	12016	0.00729654	2997	Hex3HexNAc2dHex1-AA	-60.1986
1192.39	6	9596	3319	0.00215934	428	Hex4HexNAc2-AA	28.5903	1192.43	-0.0340909	1328.13	39	5571	1702	0.0114199	477	null					1206.45	16	5488	8798	0.0196456	2122	Hex3HexA1HexNAc2-AA	-36.176	0.120641	-1206.33	1156.51	4	5089	740	0.00955047	194	null					1190.48	40	5928	6719	0.00408002	1600	null
1271.39	4	12003	1859	0.00120946	205	null				1330.14	23	5516	1075	0.00721294	326	null					1272.46	6	5214	2861	0.0063885	821	null				1162.62	5	2940	984	0.0126995	466	null					1206.49	23	5578	4144	0.00251638	946	Hex3HexA1HexNAc2-AA	-67.6713
1281.43	21	9615	7210	0.00469082	2181	Hex4HexNAc1dHex2-AA	22.2688	1281.46	-0.028536	1333.54	4	5294	168	0.00112723	55.5	null					1322.53	113	5675	47416	0.105878	12112	Hex3HexNAc2dHex2-AA	-33.2052	1322.49	-0.0439149	1176.59	19	4560	3352	0.043261	1067	Hex3HexNAc2dHex1-AA	-137.536	1176.43	-0.161824		1233.52	29	5607	5296	0.00321592	1262	Hex3HexNAc3-AA	-57.0399
1287.4	5	8076	2324	0.00151199	341	null				1338.48	5	5632	255	0.00171098	72.6	Hex4HexNAc2dHex1-AA	4.48248	1338.48	0.00599969		1337.5	7	5605	2736	0.00610938	724	null				1192.59	9	4363	1507	0.0194494	519	Hex4HexNAc2-AA	-138.278	1192.43	-0.164909		1274.58	5	5000	1254	0.000761474	275	null
1297.42	12	9143	4529	0.00294656	1387	Hex5HexNAc1dHex1-AA	26.5531	1297.46	-0.0344506	1344.1	12	5679	517	0.00346892	142	null					1347.46	23	5669	9055	0.0202195	2444	null				1204.67	4	3026	622	0.00802756	293	null					1322.57	40	5968	8331	0.00505888	2039	Hex3HexNAc2dHex2-AA	-63.4482
1313.42	18	10199	6192	0.00402851	1809	Hex6HexNAc1-AA	26.1647	1313.45	-0.0343652	1354.47	12	5605	499	0.00334815	143	Hex5HexNAc2-AA	7.31971	1354.48	0.00991432		1354.52	35	5736	13757	0.0307188	3602	Hex5HexNAc2-AA	-32.547	1354.48	-0.0440857	1206.57	12	4666	2024	0.0261218	645	Hex3HexA1HexNAc2-AA	-137.285	1206.41	-0.165645		1336.56	38	5971	8075	0.00490343	2102	null
1322.46	670	9264	213063	0.138619	77613	Hex3HexNAc2dHex2-AA	22.7493	1322.49	-0.0300851	1451.45	4	5917	127	0.000852133	38.5	null					1365.48	7	5532	2701	0.00603123	828	null				1322.66	48	4818	5786	0.0746743	1906	Hex3HexNAc2dHex2-AA	-129.221	1322.49	-0.170915		1352.56	8	7300	2158	0.00131041	437	Hex3HexA1HexNAc2dHex1-AA	-67.824
1330.46	6	8786	3216	0.00209233	634	null				1468.54	75	5807	2608	0.0174989	739	Hex3HexNAc2dHex3-AA	8.16724	1468.55	0.0119939		1374.43	4	4932	1434	0.00320207	487	null				1337.64	5	4877	613	0.0079114	203	null					1354.56	24	5404	5410	0.00328515	1466	Hex5HexNAc2-AA	-61.3377
1333.14	34	8820	11305	0.00735503	4052	null				1474.5	6	5571	185	0.0012413	55	null					1379.53	4	5547	1454	0.00324672	407	Hex3HexNAc3dHex1-AA	-10.4755	1379.51	-0.0144512	1350.68	9	2950	971	0.0125318	441	null					1379.59	39	6044	9070	0.00550763	2405	Hex3HexNAc3dHex1-AA	-56.1408
1338.45	19	9197	6570	0.00427444	2219	Hex4HexNAc2dHex1-AA	25.4023	1338.48	-0.0339997	1484.53	4	5823	139	0.00093265	43.2	Hex4HexNAc2dHex2-AA	6.00088	1484.54	0.0089085		1386.37	4	5001	1342	0.00299663	443	null				1354.66	18	4602	2037	0.0262896	744	Hex5HexNAc2-AA	-135.152	1354.48	-0.183086		1393.57	11	6149	2971	0.0018041	732	null
1346.41	4	6916	2198	0.00143002	359	null				1500.52	17	5686	524	0.00351589	163	Hex5HexNAc2dHex1-AA	11.2115	1500.54	0.0168231		1395.53	4	5043	1281	0.00286042	391	Hex4HexNAc3-AA	-14.716	1395.51	-0.0205366	1423.65	6	4742	565	0.00729191	215	null					1409.57	33	6568	8032	0.00487732	2070	Hex3HexA1HexNAc3-AA	-59.7857
1348.45	10	9142	4667	0.00303635	718	null				1516.52	311	5918	9788	0.0656747	2716	Hex6HexNAc2-AA	5.10229	1516.53	0.00773775		1405.49	8	5402	2978	0.00664976	906	null				1441.68	13	4448	1094	0.0141192	411	Hex3HexA1HexNAc1dHex3-AA	-128.524	1441.5	-0.185291		1420.58	5	6277	1620	0.000983722	383	null
1354.45	33	8598	11138	0.00724638	4387	Hex5HexNAc2-AA	24.3009	1354.48	-0.0329143	1525.56	9	5538	267	0.00179149	87.2	Hex3HexNAc3dHex2-AA	4.88843	1525.57	0.0074576		1407.51	6	5780	2334	0.00521173	651	null				1468.73	20	4890	1562	0.0201592	566	Hex3HexNAc2dHex3-AA	-126.644	1468.55	-0.186006		1430.07	4	2716	1606	0.000975221	717	null
1379.47	6	9640	2553	0.00166098	322	Hex3HexNAc3dHex1-AA	32.2942	1379.51	-0.0445488	1527.57	5	5375	164	0.00110039	55.9	null					1409.5	4	6114	1615	0.00360623	530	Hex3HexA1HexNAc3-AA	-13.6729	1409.48	-0.019272	1496.76	4	3132	261	0.00336848	134	null					1436.61	37	5823	9648	0.00585861	2634	Hex3HexNAc4-AA	-56.3739
1395.46	10	10433	3836	0.0024957	473	Hex4HexNAc3-AA	30.4296	1395.51	-0.0424634	1557.54	14	5696	408	0.00273756	129	Hex5HexNAc3-AA	11.7409	1557.56	0.0182868		1423.51	84	5798	29575	0.0660398	8250	null				1500.73	36	4928	2656	0.0342784	996	Hex5HexNAc2dHex1-AA	-128.722	1500.54	-0.193177		1452.62	6	6130	2080	0.00126305	452	null
1436.48	5	8562	2061	0.00134089	326	Hex3HexNAc4-AA	34.1198	1436.53	-0.0490125	1612.58	5	5227	148	0.000993037	49.3	null					1434.52	6	5972	2252	0.00502863	651	null				1528.78	6	2889	414	0.0053431	221	Hex3HexA2HexNAc2dHex1-AA	-188.155	1528.5	-0.287648		1468.61	9	6601	2804	0.00170269	638	Hex3HexNAc2dHex3-AA	-40.1783
1451.43	15	7066	5027	0.00327056	2510	null				1614.6	1773	5816	48312	0.32416	14442	Hex3HexNAc2dHex4-AA	5.51388	1614.6	0.00890269		1436.56	7	5650	2553	0.00570075	742	Hex3HexNAc4-AA	-20.1784	1436.53	-0.0289875	1557.76	11	5112	662	0.0085438	262	Hex5HexNAc3-AA	-130.131	1557.56	-0.202713		1498.62	9	6461	3016	0.00183142	758	Hex3HexA1HexNAc2dHex2-AA	-67.947
1458.44	5	9971	2211	0.00143848	287	null				1622.59	4	5188	115	0.000771617	51.5	null					1441.52	19	5510	6632	0.014809	1958	Hex3HexA1HexNAc1dHex3-AA	-16.157	1441.5	-0.0232907	1582.78	5	4057	243	0.00313617	99.4	Hex3HexNAc4dHex1-AA	-121.987	1582.59	-0.193079		1500.6	8	5850	2775	0.00168508	758	Hex5HexNAc2dHex1-AA	-40.102
1468.5	110	10975	34154	0.0222206	12402	Hex3HexNAc2dHex3-AA	30.6393	1468.55	-0.0449939	1625.63	10	5306	261	0.00175123	97.2	null					1468.59	56	5907	18267	0.0407895	4989	Hex3HexNAc2dHex3-AA	-27.9221	1468.55	-0.0410061	1612.77	17	5440	807	0.0104152	317	Hex3HexA1HexNAc4-AA	-127.668	1612.56	-0.205899		1514.61	4	6066	1491	0.000905388	309	Hex4HexA1HexNAc2dHex1-AA	-63.3247
1474.48	6	9098	2475	0.00161023	361	null				1638.54	20	5810	529	0.00354944	182	null					1500.57	69	5990	20885	0.0466354	5820	Hex5HexNAc2dHex1-AA	-24.7751	1500.54	-0.0371769	1646.81	25	5331	1080	0.0139385	412	Hex5HexNAc2dHex2-AA	-132.54	1646.59	-0.218268		1525.65	27	5787	8481	0.00514997	2432	Hex3HexNAc3dHex2-AA	-56.0693
1484.49	12	10108	4408	0.00286784	1532	Hex4HexNAc2dHex2-AA	32.9463	1484.54	-0.0489085	1646.58	35	6021	939	0.00630042	284	Hex5HexNAc2dHex2-AA	8.94699	1646.59	0.0147319		1516.58	8	5659	2360	0.00526979	693	Hex6HexNAc2-AA	-29.1856	1516.53	-0.0442623	1674.82	5	7283	215	0.0027748	74	Hex3HexA2HexNAc2dHex2-AA	-159.861	1674.55	-0.267739		1539.64	17	6055	5674	0.00344546	1658	null
1492.44	11	7346	3905	0.00254059	1931	null				1662.58	12	6215	306	0.00205317	93.9	Hex6HexNAc2dHex1-AA	6.40364	1662.59	0.0106466		1557.6	15	5903	4005	0.00894301	1196	Hex5HexNAc3-AA	-24.8544	1557.56	-0.0387132	1719.84	21	5578	724	0.00934397	279	Hex6HexNAc3-AA	-131.925	1719.61	-0.22689		1557.64	7	5862	2755	0.00167293	765	Hex5HexNAc3-AA	-54.3855
1498.48	6	10611	2700	0.00175662	338	null				1666.16	8	6338	198	0.00132852	72.7	null					1582.64	11	5975	2936	0.00655597	881	Hex3HexNAc4dHex1-AA	-29.1151	1582.59	-0.0460787	1815.88	5	4856	164	0.00211659	69.6	Hex3HexA1HexNAc5-AA	-129.704	1815.64	-0.235527		1566.69	6	5765	2490	0.00151202	617	null
1500.49	35	11076	11207	0.00729127	4024	Hex5HexNAc2dHex1-AA	31.2052	1500.54	-0.0468231	1671.6	11	5773	294	0.00197266	95.8	Hex3HexNAc3dHex3-AA	17.5679	1671.63	0.0293664		1596.57	5	5659	1281	0.00286042	391	null				1864.9	8	5694	222	0.00286514	91.5	null					1582.68	214	5664	70352	0.0427202	22687	Hex3HexNAc4dHex1-AA	-57.5471
1516.49	292	11241	89570	0.0582742	34383	Hex6HexNAc2-AA	30.1603	1516.53	-0.0457377	1678.57	108	6161	2792	0.0187335	835	Hex7HexNAc2-AA	7.48325	1678.58	0.0125612		1612.61	20	6379	4762	0.0106334	1447	Hex3HexA1HexNAc4-AA	-25.3624	1612.56	-0.0408995	1920.88	4	5724	86.1	0.00111121	43.1	Hex4HexA1HexNAc4dHex1-AA	-108.371	1920.67	-0.208167		1596.96	5	2497	2312	0.00140393	1177	null
1525.51	19	8267	6511	0.00423605	3300	Hex3HexNAc3dHex2-AA	40.9422	1525.57	-0.0624576	1701.58	4	6048	93.4	0.000626687	29	null					1636.56	5	5964	1218	0.00271975	367	null				1922.93	6	5444	131	0.00169069	61	Hex6HexNAc4-AA	-125.598	1922.69	-0.241517		1598.69	6	6366	2597	0.00157699	983	Hex4HexNAc4-AA	-66.4069
1527.16	14	8344	4807	0.00312743	2098	null				1728.62	5	5577	121	0.000811875	39.3	Hex3HexNAc4dHex2-AA	13.2071	1728.65	0.0228301		1638.57	13	5977	2887	0.00644656	956	null				1961.94	4	5192	98.4	0.00126995	50.5	Hex3HexA1HexNAc5dHex1-AA	-120.604	1961.7	-0.236618		1612.66	170	5664	57130	0.0346914	18938	Hex3HexA1HexNAc4-AA	-58.8466
1550.29	4	3440	1940	0.00126216	672	Hex1HexNAc4dHex3-AA	20.0667	1550.6	-0.311092	1750.6	4	5659	91.8	0.000615952	36.3	null					1646.63	42	6401	9817	0.021921	2813	Hex5HexNAc2dHex2-AA	-22.0256	1646.59	-0.0362681	2012.02	4	5090	76.5	0.000987312	36	Hex6HexNAc3dHex2-AA	-146.158	2011.73	-0.294072		1639.7	9	6003	3803	0.00230932	1059	Hex3HexNAc5-AA	-55.2631
1557.51	35	12448	11330	0.00737129	3912	Hex5HexNAc3-AA	32.9288	1557.56	-0.0512868	1760.65	108	6288	2565	0.0172104	785	Hex3HexNAc2dHex5-AA	8.9805	1760.66	0.0158115		1678.61	6	5937	1208	0.00269742	385	Hex7HexNAc2-AA	-15.1547	1678.58	-0.0254388	2084.99	7	6743	114	0.00147129	50.4	Hex5HexNAc2dHex5-AA	-103.858	2084.77	-0.216542		1660.66	4	6926	2222	0.00134928	574	Hex4HexA1HexNAc2dHex2-AA	-50.5845
1582.54	5	11601	2400	0.00156144	289	Hex3HexNAc4dHex1-AA	32.8089	1582.59	-0.0519213	1784.59	4	6078	105	0.00070452	35.3	null					1712.59	5	5864	1073	0.00239597	361	null				2230.08	6	7198	76.7	0.000989893	31.4	null					1671.72	5	5293	2461	0.00149441	591	Hex3HexNAc3dHex3-AA	-53.6177
1612.53	5	8696	2352	0.00153021	347	null				1817.66	52	6294	1181	0.00792417	379	Hex3HexNAc3dHex4-AA	12.805	1817.68	0.0232752		1714.66	9	6119	1956	0.00436767	639	null				2247.06	4	7741	48.9	0.000631105	15.9	Hex8HexNAc4-AA	-116.094	2246.8	-0.26087		1678.67	5	6226	2475	0.00150291	624	Hex7HexNAc2-AA	-53.2794
1614.55	762	10896	230143	0.149731	104158	Hex3HexNAc2dHex4-AA	31.5274	1614.6	-0.0509027	1832.59	10	6026	220	0.00147614	82.7	null					1719.65	25	6509	4991	0.0111447	1476	Hex6HexNAc3-AA	-20.8704	1719.61	-0.0358897	2514.2	4	6312	35.5	0.000458164	18.2	Hex3HexA1HexNAc7dHex2-AA	-113.739	2513.92	-0.285964		1685.67	10	6828	4381	0.0026603	1268	null
1622.55	12	5238	4483	0.00291664	3627	null				1840.62	14	6060	312	0.00209343	112	Hex8HexNAc2-AA	12.1615	1840.64	0.0223846		1739.55	4	4859	760	0.00169705	288	null				2595.32	5	7523	47	0.000606584	18.7	null					1703.7	7	7320	3623	0.00220001	861	Hex5HexNAc3dHex1-AA	-49.1896
1625.21	46	9004	14706	0.00956772	7606	null				1874.68	19	6009	407	0.00273085	144	Hex3HexNAc4dHex3-AA	14.2632	1874.71	0.0267389		1758.63	8	6291	1418	0.00316634	449	Hex3HexA1HexNAc4dHex1-AA	-4.5437	1758.62	-0.00799069												1728.74	29	5814	12208	0.00741313	4047	Hex3HexNAc4dHex2-AA	-52.7378
1636.48	10	11952	3971	0.00258353	1475	null				1881.62	5	5309	103	0.0006911	39.7	Hex7HexNAc3-AA	20.6915	1881.66	0.0389337		1774.65	5	6524	987	0.00220393	338	Hex4HexA1HexNAc4-AA	-18.6381	1774.62	-0.0330761												1742.74	32	3592	13289	0.00806956	9705	null
1638.48	55	8947	17309	0.0112612	9510	null				1929.65	9	5626	181	0.00121446	74.2	Hex8HexNAc1dHex2-AA	9.75806	1929.67	0.0188297		1785.68	9	5773	1583	0.00353478	575	Hex3HexNAc5dHex1-AA	-4.31553	1785.67	-0.00770614												1758.73	23	6329	9906	0.00601528	3051	Hex3HexA1HexNAc4dHex1-AA	-60.8341
1646.54	67	11166	20811	0.0135396	9138	Hex5HexNAc2dHex2-AA	32.0259	1646.59	-0.0527319	1930.66	42	6146	847	0.00568313	304	null					1788.65	11	6299	1997	0.00445922	653	Hex3HexA2HexNAc4-AA	-27.8487	1788.6	-0.0498115												1778.45	15	3339	7801	0.00473705	4895	null
1662.53	22	12049	8331	0.00542014	1340	Hex6HexNAc2dHex1-AA	33.4709	1662.59	-0.0556466	1963.72	76	6508	1564	0.010494	520	Hex3HexNAc3dHex5-AA	11.8062	1963.74	0.023184		1815.67	12	6209	2037	0.00454854	673	Hex3HexA1HexNAc5-AA	-15.7115	1815.64	-0.028527												1785.77	35	5822	15512	0.00941944	5401	Hex3HexNAc5dHex1-AA	-54.1539
1671.57	17	11205	5853	0.00380796	2333	Hex3HexNAc3dHex3-AA	33.1224	1671.63	-0.0553664	2020.73	44	6527	876	0.00587771	315	Hex3HexNAc4dHex4-AA	14.1769	2020.76	0.0286478		1840.67	7	6347	1115	0.00248975	362	Hex8HexNAc2-AA	-18.2626	1840.64	-0.0336154												1799.69	5	4869	3206	0.0019468	1495	Hex9HexNAc1-AA	-42.8766
1678.53	121	12159	36909	0.024013	15668	Hex7HexNAc2-AA	31.3138	1678.58	-0.0525612	2043.67	10	5887	207	0.00138891	80.2	null					1842.7	7	5940	1131	0.00252548	458	Hex3HexNAc6-AA	-5.55837	1842.69	-0.0102424												1810.78	4	7243	2454	0.00149016	505	null
1687.57	5	8965	2690	0.00175011	463	Hex4HexNAc3dHex2-AA	32.7579	1687.62	-0.055281	2050.71	6	6138	110	0.000738068	42.3	null					1864.7	17	6480	2719	0.00607142	857	null															1815.75	131	5903	57037	0.0346349	21315	Hex3HexA1HexNAc5-AA	-58.1176
1701.55	12	12539	4222	0.00274683	638	null				2056.59	4	5922	81.8	0.000548854	30.3	null					1906.75	6	6404	853	0.00190472	254	Hex5HexNAc4dHex1-AA	-27.498	1906.7	-0.0524318												1842.78	5	6282	3103	0.00188425	767	Hex3HexNAc6-AA	-48.9708
1719.56	7	12198	2748	0.00178785	361	Hex6HexNAc3-AA	31.4676	1719.61	-0.0541103	2076.7	4	5682	77.2	0.00051799	28.9	null					1920.69	8	6518	1271	0.00283809	467	Hex4HexA1HexNAc4dHex1-AA	-8.93806	1920.67	-0.0171673												1849.78	11	5899	5812	0.00352925	1860	Hex5HexNAc3dHex2-AA	-55.6259
1728.59	10	12864	3632	0.00236298	480	Hex3HexNAc4dHex2-AA	32.8766	1728.65	-0.0568301	2082.66	4	5618	70.4	0.000472364	29.1	null					1922.71	8	6706	1264	0.00282246	420	Hex6HexNAc4-AA	-12.2312	1922.69	-0.0235172												1874.81	6	6254	3489	0.00211865	872	Hex3HexNAc4dHex3-AA	-55.0782
1750.57	7	14309	2742	0.00178394	353	null				2166.8	421	6696	7832	0.0525505	2699	Hex3HexNAc4dHex5-AA	8.56403	2166.82	0.0185566		1961.73	5	6469	704	0.001572	252	Hex3HexA1HexNAc5dHex1-AA	-15.6077	1961.7	-0.0306182												1888.79	11	5935	5806	0.00352561	2025	null
1760.61	96	12162	28907	0.0188069	13479	Hex3HexNAc2dHex5-AA	29.9961	1760.66	-0.0528115	2177.83	5	6536	93.5	0.000627358	44.7	null					1988.76	4	6351	553	0.00123483	208	Hex3HexNAc6dHex1-AA	-4.19036	1988.75	-0.00833361												1890.81	9	6591	5449	0.00330883	1900	Hex4HexNAc4dHex2-AA	-57.8305
1784.53	13	9539	4292	0.00279237	879	null				2205.75	5	5713	85.6	0.000574351	37.1	null					2002.72	10	6679	1363	0.00304352	458	Hex9HexNAc2-AA	-13.8771	2002.69	-0.027792												1904.74	4	5818	2985	0.0018126	701	Hex3HexA1HexNAc4dHex2-AA	-30.4934
1817.63	61	12440	18594	0.0120972	8778	Hex3HexNAc3dHex4-AA	29.3103	1817.68	-0.0532752	2223.81	7	5878	132	0.000885682	55.4	Hex3HexNAc5dHex4-AA	13.4995	2223.84	0.0300203		2011.76	7	6726	970	0.00216597	307	Hex6HexNAc3dHex2-AA	-14.4511	2011.73	-0.0290721												1931.83	144	5823	69989	0.0424998	26718	Hex3HexNAc5dHex2-AA	-54.2476
1832.53	20	9094	6342	0.0041261	4097	null				2312.87	386	6713	6529	0.0438077	2382	Hex3HexNAc4dHex6-AA	4.09248	2312.88	0.00946537		2082.74	5	7332	549	0.0012259	167	Hex5HexA1HexNAc4dHex1-AA	-7.36712	2082.73	-0.0153438												1945.8	7	7606	4631	0.00281211	1702	Hex9HexNAc1dHex1-AA	-66.942
1840.58	24	11924	7549	0.00491138	3699	Hex8HexNAc2-AA	30.6341	1840.64	-0.0563846	2319.88	4	5427	63.2	0.000424054	35.3	null					2084.77	8	6987	940	0.00209898	326	Hex5HexNAc2dHex5-AA	1.1792	2084.77	0.00245836												1961.82	586	5329	284842	0.172966	121631	Hex3HexA1HexNAc5dHex1-AA	-61.9924
1874.65	23	11226	7284	0.00473897	3867	Hex3HexNAc4dHex3-AA	30.7999	1874.71	-0.0577389	2323.93	5	5695	79.9	0.000536106	47.4	null					2164.79	4	6132	364	0.000812798	147	Hex3HexA1HexNAc6dHex1-AA	-2.42316	2164.78	-0.00524562												1972.48	11	5466	7185	0.00436299	4018	null
1881.6	6	12385	2380	0.00154843	355	Hex7HexNAc3-AA	35.0413	1881.66	-0.0659337	2369.88	21	6433	346	0.00232156	139	Hex3HexNAc5dHex5-AA	10.5192	2369.9	0.0249291		2229.85	9	7032	853	0.00190472	294	null															1983.78	8	6129	5184	0.00314791	2223	null
1930.6	65	9113	18312	0.0119138	13466	Hex8HexNAc1dHex2-AA	43.4443	1929.67	0.92817	2458.91	6	5703	94.6	0.000634739	49.6	Hex3HexNAc4dHex7-AA	9.91258	2458.94	0.0243742		2244.81	5	7696	450	0.00100483	148	Hex6HexA1HexNAc4dHex1-AA	-12.2596	2244.78	-0.0275204												1988.86	26	6086	14058	0.00853652	5091	Hex3HexNAc6dHex1-AA	-55.9786
1956.59	9	8715	3012	0.00195961	613	null				2482.9	11	6423	164	0.00110039	72.2	Hex3HexNAc7dHex3-AA	4.20015	2483.94	1.04286		2246.83	5	6830	465	0.00103833	164	Hex8HexNAc4-AA	-14.6297	2246.8	-0.0328703												2003.78	4	5610	3388	0.00205731	1430	null
1963.69	92	12422	25282	0.0164485	13604	Hex3HexNAc3dHex5-AA	28.1023	1963.74	-0.055184	2515.96	128	6705	1872	0.0125606	755	Hex3HexNAc5dHex6-AA	-0.0644295	2515.96	-0.000162102		2248.87	4	6464	345	0.000770371	130	Hex3HexNAc8-AA	-9.11451	2248.85	-0.0204974												2018.85	93	5833	47519	0.0288552	19598	Hex3HexA1HexNAc6-AA	-61.4977
1974.34	6	11242	2642	0.00171888	670	null				2572.92	4	6242	59	0.000395873	29.6	Hex3HexNAc6dHex5-AA	2.26597	2572.98	0.0583016		2406.85	4	7170	313	0.000698917	113	null															2034.86	4	6655	3313	0.00201177	829	null
1993.63	4	7602	1758	0.00114375	440	null				2628.99	10	6250	136	0.000912521	67.5	Hex3HexNAc7dHex4-AA	386.372	2630	1.01577		2522.99	4	7574	272	0.000607365	107	Hex7HexNAc4dHex3-AA	-29.3173	2522.92	-0.0739673												2050.8	4	5671	3245	0.00197048	733	Hex3HexA1HexNAc4dHex3-AA	-30.8041
2002.64	5	11402	1915	0.0012459	316	Hex9HexNAc2-AA	25.0709	2002.69	-0.050208	2662.04	91	6838	1272	0.00853475	537	Hex3HexNAc5dHex7-AA	-7.60819	2662.02	-0.0202533		2595	6	7209	385	0.00085969	163	null															2077.91	12	5892	7174	0.00435631	2437	Hex3HexNAc5dHex3-AA	-60.103
2020.71	50	12586	13169	0.00856774	7024	Hex3HexNAc4dHex4-AA	26.0541	2020.76	-0.0526478	2719.03	8	6518	110	0.000738068	51.6	Hex3HexNAc6dHex6-AA	30.1962	2719.04	0.00821043		2894.05	4	7505	176	0.000393001	68.5	null															2097.84	4	5887	3346	0.00203181	942	null
2043.68	11	11805	3424	0.00222765	578	Hex8HexNAc3-AA	19.4537	2043.72	-0.0397571	2832.11	4	6320	54.3	0.000364337	25.9	Hex3HexNAc8dHex4-AA	342.196	2833.08	0.969138																							2107.88	22	6374	12070	0.00732933	4413	Hex3HexA1HexNAc5dHex2-AA	-55.8426
2050.68	18	12851	5045	0.00328227	2534	null				2865.14	22	6550	279	0.00187201	135	Hex3HexNAc6dHex7-AA	-13.9193	2865.1	-0.0398808																							2134.92	47	6330	25142	0.0152671	9971	Hex3HexNAc6dHex2-AA	-54.5335
2076.65	11	9761	3415	0.0022218	857	null				3011.22	19	6848	232	0.00155665	119	Hex3HexNAc6dHex8-AA	-21.9087	3011.15	-0.065972																							2148.02	5	5492	3881	0.00235668	2036	null
2109.76	6	13349	2002	0.0013025	304	Hex3HexNAc3dHex6-AA	18.0555	2109.8	-0.0380928																																	2164.91	159	6003	82057	0.0498279	34790	Hex3HexA1HexNAc6dHex1-AA	-59.7002
2133.68	8	9751	2411	0.0015686	541	null																																				2194.89	4	5896	3311	0.00201056	853	null
2166.77	282	12659	61969	0.040317	37509	Hex3HexNAc4dHex5-AA	23.3327	2166.82	-0.0505566																																	2201.12	9	3549	6275	0.0038104	3285	null
2177.39	13	7194	3300	0.00214698	3102	null																																				2221.94	47	6314	24467	0.0148572	9698	Hex3HexA1HexNAc7-AA	-61.1097
2190.75	5	13699	1918	0.00124785	364	Hex3HexNAc7dHex1-AA	49.0717	2191.83	-1.07504																																	2277.97	6	5505	4169	0.00253157	1542	null
2196.74	10	12004	3090	0.00201035	532	null																																				2280.99	42	6224	21553	0.0130878	8875	Hex3HexNAc6dHex3-AA	-57.2189
2205.73	7	11954	2269	0.00147621	420	Hex9HexNAc3-AA	19.3046	2205.77	-0.0425806																																	2310.98	231	6045	110193	0.0669131	49191	Hex3HexA1HexNAc6dHex2-AA	-62.0242
2223.8	14	15129	3837	0.00249635	711	Hex3HexNAc5dHex4-AA	21.5938	2223.84	-0.0480203																																	2338.03	16	6568	8558	0.00519672	3430	Hex3HexNAc7dHex2-AA	-59.9019
2268.65	4	6563	1380	0.000897827	295	null																																				2368.01	162	6289	75899	0.0460886	33585	Hex3HexA1HexNAc7dHex1-AA	-62.4462
2279.75	13	10586	3406	0.00221594	804	Hex3HexNAc6dHex3-AA	49.0179	2280.86	-1.11748																																	2425.04	5	6423	3332	0.00202331	1272	Hex3HexA1HexNAc8-AA	-63.673
2312.83	317	12566	59897	0.038969	39813	Hex3HexNAc4dHex6-AA	19.6579	2312.88	-0.0454654																																	2427.05	15	6544	7529	0.00457188	2970	Hex3HexNAc6dHex4-AA	-53.4011
2320.84	12	10660	3672	0.002389	997	null																																				2457.03	8	6494	4267	0.00259107	1413	Hex3HexA1HexNAc6dHex3-AA	-53.8976
2323.45	17	10449	4943	0.00321591	1817	null																																				2484.08	34	6566	14688	0.00891908	6071	Hex3HexNAc7dHex3-AA	-54.8064
2336.76	9	11670	2603	0.00169351	572	null																																				2498.06	4	9182	2810	0.00170633	664	Hex9HexNAc3dHex2-AA	-71.4961
2342.82	10	14493	2653	0.00172604	487	null																																				2514.08	502	6036	196224	0.119154	96851	Hex3HexA1HexNAc7dHex2-AA	-65.2184
2369.85	29	11375	5713	0.00371687	4077	Hex3HexNAc5dHex5-AA	22.3344	2369.9	-0.0529291																																	2536.09	8	6454	4657	0.0028279	2859	null
2458.89	13	14893	3150	0.00204939	607	Hex3HexNAc4dHex7-AA	18.0464	2458.94	-0.0443742																																	2544.04	7	6412	3844	0.00233421	1506	Hex10HexA1HexNAc3-AA	-71.3465
2464.84	4	15066	1184	0.00077031	143	null																																				2571.07	10	6180	5113	0.0031048	2280	Hex3HexA1HexNAc8dHex1-AA	-51.1462
2482.83	33	10200	5627	0.00366092	4795	null																																				2630.15	28	6642	10527	0.00639237	4468	Hex3HexNAc7dHex4-AA	-55.5994
2515.92	150	12813	22935	0.0149215	16451	Hex3HexNAc5dHex6-AA	17.0268	2515.96	-0.0428379																																	2650.11	5	7205	2640	0.0016031	685	null
2572.93	7	13321	1730	0.00112554	341	Hex3HexNAc6dHex5-AA	21.105	2572.98	-0.0543016																																	2660.15	170	6442	57250	0.0347642	28706	Hex3HexA1HexNAc7dHex3-AA	-66.9343
2628.89	35	10256	5019	0.00326536	4610	null																																				2687.16	5	7347	2692	0.00163468	979	Hex3HexNAc8dHex3-AA	-49.4095
2661.97	131	13040	17211	0.0111975	13138	Hex3HexNAc5dHex7-AA	16.0583	2662.02	-0.0427467																																	2690.11	7	6979	3219	0.00195469	1141	Hex10HexA1HexNAc3dHex1-AA	-74.5691
2672.57	6	5129	1716	0.00111643	705	null																																				2717.18	14	7171	5225	0.00317281	2265	Hex3HexA1HexNAc8dHex2-AA	-65.727
2685.93	5	11958	1425	0.000927104	312	null																																				2776.24	11	6175	3657	0.00222066	1593	Hex3HexNAc7dHex5-AA	-63.1524
2718.99	18	10885	2566	0.00166944	2172	Hex3HexNAc6dHex6-AA	18.0988	2719.04	-0.0492104																																	2806.24	12	6463	3988	0.00242166	1686	Hex3HexA1HexNAc7dHex4-AA	-74.8854
2808.03	5	11037	1206	0.000784623	249	Hex5HexNAc7dHex3-AA	8.37008	2808.05	-0.0235034																																	2830.15	6	6159	2242	0.00136142	953	null
2831.96	16	11107	2814	0.00183079	762	Hex3HexNAc8dHex4-AA	39.5181	2833.08	-1.11914																																	2833.23	7	6295	2453	0.00148955	1032	Hex3HexNAc8dHex4-AA	-53.9532
2838.01	4	14086	1109	0.000721515	190	null																																				2863.24	18	6735	5261	0.00319467	2379	Hex3HexA1HexNAc8dHex3-AA	-63.8029
2865.05	57	13216	6294	0.00409487	5165	Hex3HexNAc6dHex7-AA	17.1443	2865.1	-0.0491192																																	2920.26	8	7097	2339	0.00142032	936	Hex3HexA1HexNAc9dHex2-AA	-64.1104
2978.02	14	12215	2440	0.00158746	619	null																																				2952.34	4	6658	1316	0.000799122	449	Hex3HexA1HexNAc7dHex5-AA	-83.4044
3011.1	62	13159	5892	0.00383333	5229	Hex3HexNAc6dHex8-AA	17.2787	3011.15	-0.052028																																	2979.28	6	7191	1678	0.00101894	575	Hex3HexNAc8dHex5-AA	-46.6399
3181.09	7	12965	1206	0.000784623	275	null																																				3009.22	10	6769	2537	0.00154056	1057	Hex3HexA1HexNAc8dHex4-AA	-36.8115
3214.15	5	13734	927	0.000603106	174	Hex3HexNAc7dHex8-AA	25.9479	3214.23	-0.0834006																																	3066.33	10	7830	2302	0.00139786	920	Hex3HexA1HexNAc9dHex3-AA	-62.3908
3327.16	8	14624	1249	0.000812599	281	null																																				3182.38	4	7655	908	0.00055137	288	Hex3HexNAc9dHex5-AA	-49.5167
[truncated: 62 more columns]

## Sheet: (B) Sm GSL glycans
Eggs - Acidic fraction - Fig. 2											Eggs - Neutral fraction - Fig. 2											Eggs - Total - Fig. 2
m/z	S/N	Res.	Intens.	% Intens.	Area	Suggested glycan composition	Accuracy (PPM)	Th. m/z	Deviation		m/z	S/N	Res.	Intens.	% Intens.	Area	Suggested glycan composition	Accuracy (PPM)	Th. m/z	Deviation		m/z	S/N	Res.	Intens.	% Intens.	Area	Suggested glycan composition	Accuracy (PPM)	Th. m/z	Deviation
909.372	11	1838	1811	0.0120058	1597	Hex1HexNAc3-AA	381.731	909.347	0.0250069		990.176	72	5327	8890	0.0269625	1763	null					990.089	9	5464	2028	0.00762552	451	null
990.135	17	2757	3312	0.0219565	1174	null					1014.49	34	5032	4246	0.0128777	1451	Hex2HexNAc2dHex1-AA	-105.124	1014.38	0.106647		1003.06	5	5271	1074	0.00403837	243	Hex3HexA1HexNAc1-AA	261.183	1003.33	0.261983
1014.46	5	4842	1040	0.00689454	248	Hex2HexNAc2dHex1-AA	373.129	1014.38	0.0786472		1055.49	19	5989	2368	0.00718192	519	Hex1HexNAc3dHex1-AA	-85.361	1055.4	0.0900981		1014.39	20	5653	4358	0.0163866	851	Hex2HexNAc2dHex1-AA	-11.4819	1014.38	-0.0116472
1055.47	16	4844	2584	0.0171303	1181	Hex1HexNAc3dHex1-AA	383.793	1055.4	0.0630981		1112.52	5	6669	582	0.00176515	120	Hex1HexNAc4-AA	-82.3666	1112.43	0.0916343		1030.39	4	5414	808	0.00303818	192	Hex3HexNAc2-AA	-20.121	1030.37	-0.0207325
1076.45	10	4891	1529	0.0101363	701	null					1160.53	12	6060	1530	0.00464034	376	Hex2HexNAc2dHex2-AA	-79.0488	1160.44	0.0917384		1055.41	18	5710	3991	0.0150066	784	Hex1HexNAc3dHex1-AA	-1.04042	1055.4	-0.00109806
1112.47	4	5012	815	0.00540293	224	Hex1HexNAc4-AA	383.422	1112.43	0.0426343		1201.57	76	6818	9563	0.0290037	2306	Hex1HexNAc3dHex2-AA	-88.3755	1201.46	0.106189		1112.43	5	5837	987	0.00371124	208	Hex1HexNAc4-AA	0.328704	1112.43	0.000365659
1201.54	15	5490	2166	0.0143592	1047	Hex1HexNAc3dHex2-AA	385.354	1201.46	0.0781893		1217.66	6	2140	765	0.00232017	410	Hex2HexNAc3dHex1-AA	-163.654	1217.46	0.199275		1160.42	8	5896	1656	0.00622676	364	Hex2HexNAc2dHex2-AA	9.70476	1160.44	0.0112616
1258.55	11	5739	1606	0.0106468	862	Hex1HexNAc4dHex1-AA	384.956	1258.48	0.0687255		1258.58	24	6898	2955	0.00896223	661	Hex1HexNAc4dHex1-AA	-78.4418	1258.48	0.0987255		1165.06	5	5576	1117	0.00420005	280	Hex4HexA1HexNAc1-AA	273.639	1165.38	0.318806
1279.55	6	5984	943	0.00625149	230	Hex2HexA1HexNAc1dHex3-AA	349.403	1279.45	0.100114		1327.21	9	6600	1178	0.00357276	244	null					1201.45	53	6147	11134	0.0418652	2294	Hex1HexNAc3dHex2-AA	7.3334	1201.46	0.00881074
1288.55	5	5614	890	0.00590014	199	Hex1HexA1HexNAc4-AA	355.942	1288.46	0.0915464		1404.84	76	2561	9913	0.0300652	5525	Hex1HexNAc4dHex2-AA	-213.417	1404.54	0.299817		1217.44	5	5589	1051	0.00395189	250	Hex2HexNAc3dHex1-AA	15.3809	1217.46	0.0187254
1328.22	6	3086	846	0.00560844	1002	null					1420.71	4	6533	491	0.00148916	132	Hex2HexNAc4dHex1-AA	-120.294	1420.54	0.170902		1258.47	19	6222	3812	0.0143336	800	Hex1HexNAc4dHex1-AA	9.75347	1258.48	0.0122745
1368.58	9	5612	1205	0.00798839	737	Hex4HexA1HexNAc2-AA	334.926	1368.46	0.123821		1461.69	5	7749	618	0.00187433	149	Hex1HexNAc5dHex1-AA	-86.4431	1461.56	0.126353		1347.51	9	6655	1719	0.00646365	378	Hex1HexNAc3dHex3-AA	5.72874	1347.52	0.00771955
1404.63	26	5907	3496	0.0231763	2106	Hex1HexNAc4dHex2-AA	386.17	1404.54	0.0918167		1550.99	26	3048	3626	0.0109973	1879	Hex1HexNAc4dHex3-AA	-248.815	1550.6	0.385908		1404.53	86	6827	16339	0.0614366	3410	Hex1HexNAc4dHex2-AA	7.2503	1404.54	0.0101833
1425.62	8	6105	1068	0.00708016	633	Hex2HexA1HexNAc1dHex4-AA	354.242	1425.5	0.110205		1567	8	2764	1074	0.00325734	611	Hex2HexNAc4dHex2-AA	-259.727	1566.6	0.406993		1420.52	4	6624	683	0.00256816	172	Hex2HexNAc4dHex1-AA	12.0364	1420.54	0.0170979
1434.62	9	6005	1261	0.00835963	759	Hex1HexA1HexNAc4dHex1-AA	360.085	1434.52	0.105638		1608.02	26	3279	3688	0.0111853	1889	Hex1HexNAc5dHex2-AA	-244.677	1607.62	0.393444		1461.55	9	6893	1590	0.00597859	345	Hex1HexNAc5dHex1-AA	12.7584	1461.56	0.018647
1461.68	4	4422	585	0.00387818	210	Hex1HexNAc5dHex1-AA	385.795	1461.56	0.114353		1697.07	17	3760	2614	0.00792801	1227	Hex1HexNAc4dHex4-AA	-242.182	1696.66	0.410999		1517.5	8	6451	1530	0.00575298	383	null
1550.74	9	5868	1124	0.00745141	806	Hex1HexNAc4dHex3-AA	387.156	1550.6	0.141908		1713.07	8	3768	1192	0.00361522	570	Hex2HexNAc4dHex3-AA	-244.056	1712.65	0.418084		1550.59	26	7309	4660	0.0175222	1020	Hex1HexNAc4dHex3-AA	9.08823	1550.6	0.0140921
1580.7	4	5261	655	0.00434223	216	Hex1HexA1HexNAc4dHex2-AA	363.463	1580.57	0.129729		1721.05	6	4594	906	0.00274781	459	Hex1HexNAc7-AA	356.458	1721.66	-0.613483		1566.57	10	7068	1763	0.00662909	426	Hex2HexNAc4dHex2-AA	13.4093	1566.6	0.0210067
1607.78	8	5015	1036	0.00686802	979	Hex1HexNAc5dHex2-AA	386.78	1607.62	0.157444		1754.1	60	4376	9319	0.0282636	4283	Hex1HexNAc5dHex3-AA	-239.174	1753.68	0.419535		1607.6	29	7247	5174	0.0194549	1174	Hex1HexNAc5dHex2-AA	14.0307	1607.62	0.0225558
1637.75	4	5791	625	0.00414335	188	Hex1HexA1HexNAc5dHex1-AA	363.919	1637.6	0.155265		1811.11	23	4881	3714	0.0112642	1730	Hex1HexNAc6dHex2-AA	-226.42	1810.7	0.410072		1664.6	5	7515	929	0.00349315	204	Hex1HexNAc6dHex1-AA	26.4445	1664.64	0.0440195
1753.84	9	5433	1178	0.00780939	1224	Hex1HexNAc5dHex3-AA	387.601	1753.68	0.164535		1843.15	6	5832	1074	0.00325734	441	Hex1HexNAc4dHex5-AA	-233.888	1842.72	0.43109		1696.63	14	7287	2447	0.00920101	585	Hex1HexNAc4dHex4-AA	14.1462	1696.66	0.0240009
1774.81	4	5551	627	0.00415661	205	Hex2HexA1HexNAc2dHex5-AA	361.937	1774.64	0.162924		1900.18	71	5138	12254	0.0371652	5767	Hex1HexNAc5dHex4-AA	-232.939	1899.74	0.442627		1712.63	6	7206	1126	0.00423389	267	Hex2HexNAc4dHex3-AA	15.132	1712.65	0.0259155
1783.8	11	6154	1460	0.00967887	1374	Hex1HexA1HexNAc5dHex2-AA	366.598	1783.65	0.145356		1957.2	128	5276	22778	0.0690835	10601	Hex1HexNAc6dHex3-AA	-225.916	1956.76	0.442163		1720.59	8	7034	1464	0.00550481	369	null
1810.87	6	5312	929	0.00615868	364	Hex1HexNAc6dHex2-AA	387.253	1810.7	0.169072		1989.23	15	6150	2726	0.0082677	1266	Hex1HexNAc4dHex6-AA	-227.818	1988.77	0.453181		1753.66	44	7420	7712	0.028998	1936	Hex1HexNAc5dHex3-AA	9.95894	1753.68	0.0174646
1899.87	8	5248	1126	0.00746467	1413	Hex1HexNAc5dHex4-AA	388.296	1899.74	0.134627		2014.19	4	4749	786	0.00238386	371	Hex1HexNAc7dHex2-AA	-202.414	2013.78	0.407699		1783.62	4	7151	704	0.00264712	187	Hex1HexA1HexNAc5dHex2-AA	18.302	1783.65	0.0326438
1929.86	11	6145	1558	0.0103286	1613	Hex1HexA1HexNAc5dHex3-AA	368.871	1929.71	0.145447		2046.25	23	5851	4160	0.0126169	1921	Hex1HexNAc5dHex5-AA	-222.709	2045.8	0.455718		1810.68	19	7696	3226	0.0121301	765	Hex1HexNAc6dHex2-AA	8.79686	1810.7	0.0159283
1956.89	14	5905	1864	0.0123571	2144	Hex1HexNAc6dHex3-AA	387.954	1956.76	0.136163		2070.27	4	6120	781	0.0023687	415	Hex1HexNAc8dHex1-AA	254.925	2070.8	-0.527765		1842.68	6	7441	985	0.00370372	243	Hex1HexNAc4dHex5-AA	16.7743	1842.72	0.0309097
1977.9	4	5803	599	0.00397099	201	Hex2HexA1HexNAc3dHex5-AA	364.921	1977.72	0.178551		2103.29	236	5691	44436	0.13477	21822	Hex1HexNAc6dHex4-AA	-225.957	2102.82	0.475254		1899.71	41	7784	7314	0.0275015	1810	Hex1HexNAc5dHex4-AA	12.3037	1899.74	0.0233734
1986.87	15	5898	1986	0.0131659	2288	Hex1HexA1HexNAc6dHex2-AA	369.092	1986.73	0.136984		2160.3	24	5891	4662	0.0141394	2384	Hex1HexNAc7dHex3-AA	-215.151	2159.84	0.46479		1923.65	4	7115	735	0.00276369	191	Hex4HexNAc2dHex5-AA	-488.323	1922.72	-0.939365
2045.93	5	6298	952	0.00631116	361	Hex1HexNAc5dHex5-AA	388.891	2045.8	0.130718		2192.34	50	5901	9605	0.029131	4736	Hex1HexNAc5dHex6-AA	-220.682	2191.85	0.483809		1956.74	76	7977	13666	0.0513858	3490	Hex1HexNAc6dHex3-AA	9.11574	1956.76	0.0178371
2066.92	4	6878	774	0.00513113	271	Hex2HexA1HexNAc2dHex7-AA	366.841	2066.76	0.159106		2249.37	153	5844	29675	0.0900014	15228	Hex1HexNAc6dHex5-AA	-219.771	2248.87	0.494345		1986.68	4	7551	674	0.00253432	225	Hex1HexA1HexNAc6dHex2-AA	25.1758	1986.73	0.0500163
2075.89	14	6868	2476	0.0164143	878	Hex1HexA1HexNAc5dHex4-AA	370.825	2075.77	0.123539		2273.38	8	7195	1634	0.00495577	674	Hex1HexNAc9dHex1-AA	219.117	2273.88	-0.498137		1988.74	10	7987	1835	0.00689982	505	Hex1HexNAc4dHex6-AA	14.9936	1988.77	0.0298185
2102.95	20	6297	2632	0.0174485	3063	Hex1HexNAc6dHex4-AA	388.557	2102.82	0.137254		2306.39	55	6721	10787	0.0327159	5473	Hex1HexNAc7dHex4-AA	-212.402	2305.9	0.489882		2013.72	5	7526	935	0.00351571	280	Hex1HexNAc7dHex2-AA	27.9586	2013.78	0.0563009
2132.93	33	6435	4422	0.0293151	5038	Hex1HexA1HexNAc6dHex3-AA	370.978	2132.79	0.136075		2338.42	64	6359	12453	0.0377688	6541	Hex1HexNAc5dHex7-AA	-217.198	2337.91	0.5079		2045.77	16	7943	2876	0.0108141	754	Hex1HexNAc5dHex5-AA	10.8918	2045.8	0.0222822
2189.95	18	6049	2375	0.0157447	3075	Hex1HexA1HexNAc7dHex2-AA	371.123	2189.81	0.137611		2395.45	114	6289	21840	0.0662386	11645	Hex1HexNAc6dHex6-AA	-213.921	2394.93	0.512436		2069.72	8	7619	1377	0.00517768	393	null
2221.95	15	6487	1936	0.0128345	2305	Hex1HexA1HexNAc5dHex5-AA	372.521	2221.83	0.12363		2419.44	16	7460	3005	0.00911388	1284	Hex1HexNAc9dHex2-AA	207.505	2419.94	-0.502046		2075.75	4	7572	730	0.00274489	214	Hex1HexA1HexNAc5dHex4-AA	10.3391	2075.77	0.0214614
2249.01	19	6213	2563	0.0169911	3331	Hex1HexNAc6dHex5-AA	-55.7338	2248.87	0.132345		2452.48	23	3896	4238	0.0128534	2371	Hex1HexNAc7dHex5-AA	-213.65	2451.95	0.523973		2102.8	121	8030	22294	0.0838281	5964	Hex1HexNAc6dHex4-AA	7.96365	2102.82	0.016746
2269.98	4	5877	756	0.0050118	292	Hex2HexA1HexNAc3dHex7-AA	369.002	2269.84	0.139734		2508.56	4	8872	768	0.00232927	276	Hex1HexNAc8dHex4-AA	165.629	2508.98	-0.415491		2126.78	4	6742	724	0.00272233	215	null
2278.98	38	6704	5096	0.0337832	6091	Hex1HexA1HexNAc6dHex4-AA	372.622	2278.85	0.129166		2541.53	180	6663	32470	0.0984784	18167	Hex1HexNAc6dHex7-AA	-211.104	2540.99	0.536528		2132.76	7	7805	1243	0.00467383	387	Hex1HexA1HexNAc6dHex3-AA	13.5623	2132.79	0.0289251
2300.99	4	6371	766	0.00507809	351	null					2565.52	11	8134	1891	0.00573522	922	Hex1HexNAc9dHex3-AA	185.91	2566	-0.476955		2159.82	13	8276	2457	0.00923861	666	Hex1HexNAc7dHex3-AA	8.43111	2159.84	0.0182097
2306.03	4	5627	753	0.00499191	293	Hex1HexNAc7dHex4-AA	-45.0484	2305.9	0.132882		2598.55	43	7008	7423	0.0225132	4161	Hex1HexNAc7dHex6-AA	-208.987	2598.01	0.543064		2191.83	29	8460	5421	0.0203836	1455	Hex1HexNAc5dHex6-AA	10.5807	2191.85	0.023191
2336	50	6543	6654	0.0441118	8541	Hex1HexA1HexNAc7dHex3-AA	-55.5233	2335.87	0.129702		2687.62	78	7293	13059	0.0396067	7390	Hex1HexNAc6dHex8-AA	-211.198	2687.05	0.567619		2215.78	7	8047	1292	0.00485807	378	Hex1HexNAc8dHex2-AA	485.008	2216.86	1.07467
2357.99	4	7446	778	0.00515765	306	null					2711.08	6	10293	921	0.0027933	344	Hex1HexNAc9dHex4-AA	361.061	2712.05	-0.978864		2221.79	4	7864	703	0.00264336	221	Hex1HexA1HexNAc5dHex5-AA	17.27	2221.83	0.0383702
2395.05	12	5945	1521	0.0100833	2156	Hex1HexNAc6dHex6-AA	-28.1572	2394.93	0.121436		2744.64	31	4508	4904	0.0148734	2987	Hex1HexNAc7dHex7-AA	-208.098	2744.07	0.571155		2248.85	84	8270	15804	0.0594249	4436	Hex1HexNAc6dHex5-AA	9.62925	2248.87	0.0216548
2425.04	44	6861	5724	0.0379465	7265	Hex1HexA1HexNAc6dHex5-AA	-38.4566	2424.91	0.132257		2833.7	6	7978	966	0.00292979	478	Hex1HexNAc6dHex9-AA	-209.165	2833.11	0.59271		2272.81	14	8152	2613	0.00982519	759	Hex1HexNAc9dHex1-AA	472.164	2273.88	1.07314
2446.98	6	5047	739	0.0048991	1439	null					2857.67	12	9238	1844	0.00559267	843	Hex1HexNAc9dHex5-AA	153.542	2858.11	-0.438772		2278.82	9	8397	1705	0.006411	502	Hex1HexA1HexNAc6dHex4-AA	12.2142	2278.85	0.0278339
2482.07	99	6520	12628	0.0837156	17256	Hex1HexA1HexNAc7dHex4-AA	-28.9257	2481.93	0.143794		2890.74	52	7473	7523	0.0228165	4570	Hex1HexNAc7dHex8-AA	-210.066	2890.13	0.607246		2305.86	32	8589	6057	0.022775	1709	Hex1HexNAc7dHex4-AA	13.929	2305.9	0.0321185
2504.02	9	6245	1132	0.00750444	1766	Hex2HexA1HexNAc2dHex10-AA	37.2053	2504.93	-0.90862		3036.36	11	11249	1372	0.00416114	433	Hex1HexNAc7dHex9-AA	-56.4286	3036.19	0.171337		2335.85	10	8320	1972	0.00741496	586	Hex1HexA1HexNAc7dHex3-AA	9.97397	2335.87	0.0232977
2540.12	15	4483	1719	0.0113959	3715	Hex1HexNAc6dHex7-AA	389.95	2540.99	-0.873472		3182.39	4	12148	450	0.00136481	147	Hex1HexNAc7dHex10-AA	-46.6406	3182.24	0.148429		2337.88	30	8232	5776	0.0217184	1805	Hex1HexNAc5dHex7-AA	12.8748	2337.91	0.0300998
2571.1	51	6683	6222	0.0412479	8792	Hex1HexA1HexNAc6dHex6-AA	-13.7489	2570.96	0.138348													2394.91	61	8384	11606	0.0436399	3460	Hex1HexNAc6dHex6-AA	8.58636	2394.93	0.0205636
2594.03	7	5167	765	0.00507146	1611	Hex4HexA1HexNAc3dHex7-AA	-22.0073	2593.94	0.0880869													2418.85	25	8029	4610	0.0173342	1489	Hex1HexNAc9dHex2-AA	449.406	2419.94	1.08705
2628.12	49	6570	5800	0.0384503	8820	Hex1HexA1HexNAc7dHex5-AA	-5.28338	2627.99	0.138885													2424.88	10	8402	1851	0.00695998	561	Hex1HexA1HexNAc6dHex5-AA	10.2037	2424.91	0.0247427
2651.07	7	5233	755	0.00500517	1604	Hex4HexA1HexNAc4dHex6-AA	-13.4377	2650.96	0.100623													2451.94	13	8344	2448	0.00920477	741	Hex1HexNAc7dHex5-AA	6.12874	2451.95	0.0150273
2685.15	16	5661	1778	0.011787	3457	Hex1HexA1HexNAc8dHex4-AA	2.82272	2685.01	0.141421													2481.9	21	8234	3796	0.0142734	1218	Hex1HexA1HexNAc7dHex4-AA	11.3649	2481.93	0.0282065
2717.17	16	6755	1796	0.0119063	2711	Hex1HexA1HexNAc6dHex7-AA	8.30341	2717.02	0.14344													2507.88	5	7862	910	0.00342171	299	Hex1HexA1HexNAc10-AA	-378.132	2506.93	-0.948311
2740.08	8	6354	827	0.00548249	1538	Hex4HexA1HexNAc3dHex8-AA	0.299953	2740	0.0781781													2540.97	90	8690	16620	0.0624932	5140	Hex1HexNAc8dHex4-AA	435.623	2508.98	1.09249
2774.2	97	6680	10751	0.0712723	17067	Hex1HexA1HexNAc7dHex6-AA	15.8703	2774.04	0.155976													2563.89	5	7825	983	0.0036962	364	Hex1HexNAc6dHex7-AA	9.63113	2540.99	0.0244724
2797.14	14	6258	1476	0.00978494	2703	Hex4HexA1HexNAc4dHex7-AA	7.96768	2797.02	0.121714													2570.93	12	8669	2090	0.00785865	649	null
2831.25	12	4615	1291	0.00855851	2882	Hex1HexA1HexNAc8dHex5-AA	23.1324	2831.07	0.185512													2597.98	20	8371	3683	0.0138485	1236	Hex1HexA1HexNAc6dHex6-AA	12.3113	2570.96	0.0316516
2887.18	7	5306	652	0.00432235	1570	Hex1HexA1HexNAc9dHex4-AA	376.499	2888.09	-0.910952													2621.93	7	7857	1173	0.00441062	406	Hex1HexNAc7dHex6-AA	11.1379	2598.01	0.0289361
2920.27	131	6780	13297	0.0881507	22559	Hex1HexA1HexNAc7dHex7-AA	34.9085	2920.1	0.170067													2627.95	9	8273	1608	0.00604627	581	Hex1HexNAc10dHex2-AA	414.358	2623.02	1.08642
2942.22	13	5944	1265	0.00838615	2724	Hex4HexA1HexNAc4dHex8-AA	367.163	2943.08	-0.865194													2653.95	6	9159	1089	0.00409477	366	Hex1HexA1HexNAc7dHex5-AA	12.9817	2627.99	0.0341153
2977.28	14	4056	1367	0.00906234	3774	Hex1HexA1HexNAc8dHex6-AA	41.45	2977.12	0.153603													2687.03	37	8352	6380	0.0239896	2159	Hex1HexA1HexNAc10dHex1-AA	-361.876	2652.99	-0.960402
3066.36	21	6521	1928	0.0127814	3697	Hex1HexA1HexNAc7dHex8-AA	52.1336	3066.16	0.196158													2710.99	12	8005	2060	0.00774585	813	Hex1HexNAc6dHex8-AA	6.84071	2687.05	0.0183812
3089.25	9	5576	762	0.00505158	1964	Hex4HexA1HexNAc4dHex9-AA	44.7081	3089.14	0.108897													2716.98	4	8679	737	0.00277121	251	Hex1HexNAc9dHex4-AA	393.533	2712.05	1.06686
3123.41	12	4881	1049	0.0069542	2621	Hex1HexA1HexNAc8dHex7-AA	58.0549	3123.18	0.223695													2744.03	15	8388	2564	0.00964095	915	Hex1HexA1HexNAc6dHex7-AA	16.4007	2717.02	0.0445604
3212.43	14	6876	1158	0.00767681	2235	Hex1HexA1HexNAc7dHex9-AA	67.7928	3212.22	0.212249													2774.02	19	8683	3172	0.0119271	1084	Hex1HexNAc7dHex7-AA	13.4273	2744.07	0.0368449
3236.4	12	6128	983	0.00651667	2077	null																2798.01	4	7104	681	0.00256064	297	Hex1HexA1HexNAc10dHex2-AA	373.661	2799.05	1.04551
3269.47	7	5864	602	0.00399088	1355	Hex1HexA1HexNAc8dHex8-AA	73.1766	3269.24	0.232786													2856.04	5	8281	785	0.00295169	304	Hex1HexA1HexNAc11dHex1-AA	10.4936	2856.07	0.0299702
																						2890.09	24	8277	3644	0.0137019	1342	Hex1HexNAc7dHex8-AA	11.3331	2890.13	0.0327537
																						2914.09	5	8082	791	0.00297425	341	Hex1HexNAc10dHex4-AA	359.027	2915.13	1.04624
																						2920.09	27	8672	4096	0.0154014	1433	Hex1HexA1HexNAc7dHex7-AA	3.40157	2920.1	0.0099329
																						2977.1	4	7568	574	0.00215831	288	Hex1HexA1HexNAc8dHex6-AA	7.52296	2977.12	0.0223966
																						3003.13	8	8446	1160	0.00436174	466	Hex1HexNAc9dHex6-AA	346.865	3004.17	1.04168
																						3036.2	8	7316	1116	0.00419629	480	Hex1HexNAc7dHex9-AA	-6.36896	3036.19	-0.0193375
																						3066.16	5	8955	710	0.00266968	256	Hex1HexA1HexNAc7dHex8-AA	-0.703908	3066.16	-0.0021583
																						3123.15	4	7905	501	0.00188382	217	Hex1HexA1HexNAc8dHex7-AA	11.3044	3123.18	0.0353054
																						3206.24	6	8013	754	0.00283513	330	Hex1HexNAc10dHex6-AA	316.587	3207.25	1.01505
																						3212.21	4	8614	501	0.00188382	220	Hex1HexA1HexNAc7dHex9-AA	1.47889	3212.22	0.00475051
																						3236.24	4	7565	480	0.00180486	232	Hex1HexA1HexNAc10dHex5-AA	305.056	3237.22	0.987233
																						3353.34	4	9648	506	0.00190262	195	Hex1HexNAc10dHex7-AA	-9.2557	3353.31	-0.0310375

## Sheet: (C) Sh N-glycans
Cercariae - biological replicate #1 (PNG-F) - Fig. 3, S1-B.1 and S6-A										Cercariae - biological replicate #2 (PNG-F) - Fig. S1-B.1											Adult worms - biological replicate #2 (PNG-F) - Fig. 3, S1-B.2 and S6-B										Adult worms - biological replicate #1 (PNG-F)- Fig. S1-B.2											Eggs - biological replicate #1 (PNG-F) - Fig. 3, S1-B.3 and S6-C
m/z	S/N	Res.	Intens.	%Intens.	Area	Suggested glycan composition	Accuracy (PPM)	Th. m/z	Deviation	m/z	S/N	Res.	Intens.	%Intens.	Area	Suggested glycan composition	Accuracy (PPM)	Th. m/z	Deviation		m/z	S/N	Res.	Intens.	%Intens.	Area	Suggested glycan composition	Accuracy (PPM)	Th. m/z	Deviation	m/z	S/N	Res.	Intens.	%Intens.	Area	Suggested glycan composition	Accuracy (PPM)	Th. m/z	Deviation		m/z	S/N	Res.	Intens.	%Intens.	Area	Suggested glycan composition	Accuracy (PPM)
866.379	36	4944	19747	0.0197745	3795	null				866.235	6	3535	82.4	0.00435196	35.8	null					921.378	7	5895	71.5	0.00334064	20.1	null				866.296	30	4808	25309	0.0155238	5247	null	0	0	0		948.393	55	5045	43819	0.0117097	15185	null
948.404	39	5212	20885	0.0209141	4109	null				948.257	13	4820	175	0.00924263	64.4	null					948.279	5	5405	65.2	0.00304629	12.3	null				868.328	4	3606	4687	0.00287488	1366	Hex2HexNAc2-AA	-8.7	868.32	0		1014.46	50	5252	39610	0.010585	14660	Hex2HexNAc2dHex1-AA	-82.4547
1014.48	73	5497	37293	0.0373449	7284	Hex2HexNAc2dHex1-AA	-95.2682	1014.38	-0.0966472	974.378	7	5455	101	0.00533432	33.5	null					955.349	6	5549	71	0.00331728	23	null				948.394	117	5010	97789	0.0599811	20411	null					1021.52	20	5268	15773	0.00421501	5880	null
1030.48	18	5321	9062	0.00907461	1919	Hex3HexNAc2-AA	-101.635	1030.37	-0.104733	1014.33	54	5192	780	0.0411957	289	Hex2HexNAc2dHex1-AA	52.6	1014.38	0.053353		974.386	15	6245	170	0.00794277	49.2	null				974.513	6	4995	5975	0.0036649	1314	null					1028.46	9	4088	7002	0.00187114	3368	null
1062.53	6	5384	2756	0.00275984	577	null				1030.32	10	4999	147	0.00776381	58.9	Hex3HexNAc2-AA	48.79	1030.37	0.050267		1012.38	22	6539	247	0.0115404	72.3	null				1012.51	7	5111	6845	0.00419853	1529	null					1030.46	50	5256	39747	0.0106216	15042	Hex3HexNAc2-AA	-81.2577
1094.43	9	5548	4236	0.0042419	915	null				1110.31	14	4536	206	0.0108799	59.3	null					1014.33	102	6681	1157	0.0540576	333	Hex2HexNAc2dHex1-AA	45.7	1014.38	0.0463528	1014.47	15	5012	14340	0.00879576	3216	Hex2HexNAc2dHex1-AA	-89.35	1014.38	-0.09065		1094.42	7	4210	5636	0.0015061	3142	null
1110.47	32	5671	15690	0.0157118	3287	null				1129.48	7	4808	105	0.00554558	28.3	null					1030.32	38	6738	428	0.0199971	125	Hex3HexNAc2-AA	47.82	1030.37	0.0492675	1028.37	24	5261	19814	0.0121534	4437	null					1110.45	29	5231	22451	0.00599957	9762	null
1114.65	7	5248	3210	0.00321447	909	null				1146.4	5	4309	78.2	0.00413014	21.8	Hex2HexNAc2Pen1dHex1-AA	17.98	1146.42	0.020612		1146.38	16	7013	191	0.00892394	64.1	Hex2HexNAc2Pen1dHex1-AA	38.04	1146.42	0.0436116	1059.57	4	4908	3617	0.00221857	942	null					1115.49	8	5221	6126	0.00163705	2696	null
1129.66	21	5738	10341	0.0103554	2179	null				1160.49	8	5069	121	0.00639062	28.1	Hex2HexNAc2dHex2-AA	-49.75	1160.44	-0.05774		1162.37	6	6073	71.7	0.00334998	29.8	Hex3HexNAc2Pen1-AA	35.73	1162.42	0.0415262	1092.39	6	4964	5433	0.00333245	1375	null					1146.51	55	5579	43527	0.0116317	18621	Hex2HexNAc2Pen1dHex1-AA	-78.8378
1139.63	6	5700	3113	0.00311733	672	null				1162.43	6	3726	93.4	0.00493292	30.9	Hex3HexNAc2Pen1-AA	-15.89	1162.42	-0.01847		1176.38	267	7450	3163	0.147782	1043	Hex3HexNAc2dHex1-AA	41.8	1176.43	0.0491763	1110.46	89	5391	72682	0.0445811	16352	null					1162.5	24	5582	18979	0.00507175	8279	Hex3HexNAc2Pen1-AA	-75.2461
1142.6	7	5847	3315	0.00331961	696	null				1176.37	95	5627	1558	0.0822858	688	Hex3HexNAc2dHex1-AA	51.15	1176.43	0.060176		1192.37	12	6398	239	0.0111666	42.3	Hex4HexNAc2-AA	44.53	1192.43	0.0530909	1146.52	4	5028	3667	0.00224924	1023	Hex2HexNAc2Pen1dHex1-AA	-90.18	1146.42	0		1176.52	181	5544	141373	0.037779	63745	Hex3HexNAc2dHex1-AA	-77.1968
1146.53	6	5307	3074	0.00307828	763	null				1192.37	7	4772	107	0.00565121	29.2	Hex4HexNAc2-AA	47.88	1192.43	0.057091		1233.4	16	7352	190	0.00887722	68.8	Hex3HexNAc3-AA	39.44	1233.45	0.04864	1162.56	4	4343	3718	0.00228052	1031	Hex3HexNAc2Pen1-AA	-124.27	1162.42	0		1192.52	42	5545	32658	0.00872718	14998	Hex4HexNAc2-AA	-77.0715
1160.64	7	5391	3496	0.00350087	862	null				1217.43	5	4515	87.6	0.0046266	26.3	Hex2HexNAc3dHex1-AA	21.13	1217.46	0.025725		1308.42	36	7457	431	0.0201373	170	Hex3HexNAc2Pen1dHex1-AA	43.13	1308.47	0.056435	1176.52	51	5618	41541	0.0254801	9503	Hex3HexNAc2dHex1-AA	-76.35	1176.43	0		1217.55	10	5717	7528	0.0020117	3432	Hex2HexNAc3dHex1-AA	-76.6084
1162.55	9	4744	4114	0.00411973	1049	Hex3HexNAc2Pen1-AA	-113.091	1162.42	-0.131474	1233.41	6	4243	93.7	0.00494877	28.3	Hex3HexNAc3-AA	30.52	1233.45	0.03764		1354.42	26	6752	668	0.0312104	123	Hex5HexNAc2-AA	44.24	1354.48	0.0599143	1190.43	18	5584	14589	0.00894849	3560	null					1233.55	31	5596	24552	0.00656101	11940	Hex3HexNAc3-AA	-74.8736
1176.54	97	5874	46224	0.0462883	9737	Hex3HexNAc2dHex1-AA	-89.0952	1176.43	-0.104824	1237.5	5	5388	75.7	0.0039981	18.1	null					1379.45	120	7988	1448	0.0676538	588	Hex3HexNAc3dHex1-AA	44.62	1379.51	0.0615488	1192.5	10	4915	9596	0.00588592	2721	Hex4HexNAc2-AA	-63.66	1192.43	0		1256.45	9	5052	6943	0.00185537	4164	null
1192.53	12	5649	5458	0.0054656	1251	Hex4HexNAc2-AA	-88.8103	1192.43	-0.105909	1255.54	14	5198	233	0.0123059	62.9	null					1395.45	8	7333	96.5	0.00450869	44.9	Hex4HexNAc3-AA	42.61	1395.51	0.0594634	1196.6	14	5618	11710	0.00718259	2878	null					1272.51	24	5297	18849	0.00503701	10891	null
1217.59	8	5455	3588	0.00359299	859	Hex2HexNAc3dHex1-AA	-108.636	1217.46	-0.132275	1272.37	16	4543	271	0.0143129	181	null					1436.47	34	8092	412	0.0192495	177	Hex3HexNAc4-AA	42.47	1436.53	0.0610125	1233.55	9	5520	7475	0.00458496	1854	Hex3HexNAc3-AA	-77.31	1233.45	0		1308.57	162	5815	125164	0.0334475	64418	Hex3HexNAc2Pen1dHex1-AA	-73.0302
1233.57	8	5442	3610	0.00361502	893	Hex3HexNAc3-AA	-95.9491	1233.45	-0.11836	1279.48	4	4740	73.8	0.00389775	23.7	null					1511.49	8	7762	90.6	0.00423303	45.6	Hex3HexNAc3Pen1dHex1-AA	44.2	1511.55	0.0668075	1272.52	127	5763	104850	0.0643121	25675	null					1338.58	12	5809	9299	0.00248497	5148	Hex4HexNAc2dHex1-AA	-71.718
1237.71	6	5717	2842	0.00284596	681	null				1308.4	24	5565	416	0.0219711	229	Hex3HexNAc2Pen1dHex1-AA	53.83	1308.47	0.070435		1516.46	149	8529	1792	0.0837262	810	Hex6HexNAc2-AA	45.99	1516.53	0.0697377	1279.65	8	5305	6918	0.00424331	2003	null					1349.59	9	6064	6936	0.0018535	3614	Hex2HexNAc3Pen1dHex1-AA	-69.6624
1247.66	4	5744	2135	0.00213797	562	null				1331.56	7	5314	119	0.00628499	34.4	null					1541.49	29	8273	345	0.0161192	166	Hex4HexNAc3dHex1-AA	44.35	1541.56	0.0683722	1308.58	11	5530	9478	0.00581354	2598	Hex3HexNAc2Pen1dHex1-AA	-78.38	1308.47	-0.10256		1354.57	185	5857	143123	0.0382467	77817	Hex5HexNAc2-AA	-70.196
1255.7	4	5757	2384	0.00238732	576	null				1336.54	5	5674	86.5	0.0045685	23.7	null					1582.51	207	8735	2448	0.114376	1175	Hex3HexNAc4dHex1-AA	48.61	1582.59	0.0769213	1331.7	10	5698	8195	0.00502659	2143	null					1365.59	12	5919	9537	0.00254857	5209	Hex3HexNAc3Pen1-AA	-68.1767
1269.63	4	5408	2645	0.00264868	718	null				1338.44	6	4320	108	0.00570402	35	Hex4HexNAc2dHex1-AA	31.38	1338.48	0.042		1678.5	51	7543	1347	0.0629348	271	Hex7HexNAc2-AA	49.19	1678.58	0.0825612	1336.7	10	5799	8744	0.00536333	2319	null					1379.61	151	5897	116679	0.0311801	65091	Hex3HexNAc3dHex1-AA	-7.06369
1272.54	40	5920	18381	0.0184066	4429	null				1344.54	7	5478	125	0.00660188	33.2	null					1687.54	9	7728	106	0.00495255	69.1	Hex4HexNAc3dHex2-AA	48.17	1687.62	0.081281	1338.64	4	4314	4324	0.00265222	1394	Hex4HexNAc2dHex1-AA	-120.27	1338.48	-0.161		1395.6	28	6035	22039	0.00588947	12187	Hex4HexNAc3-AA	-69.172
1279.67	11	6171	6645	0.00665425	1486	null				1354.4	19	5270	343	0.0181156	217	Hex5HexNAc2-AA	54.57	1354.48	0.073914		1714.54	23	8820	270	0.012615	150	Hex3HexNAc4Pen1dHex1-AA	51.43	1714.63	0.0881801	1344.71	7	5975	5715	0.00350542	1666	null					1434.57	18	5997	14238	0.00380481	8357	null
1308.58	42	6254	19576	0.0196032	4312	Hex3HexNAc2Pen1dHex1-AA	-83.728	1308.47	-0.109565	1358.57	7	6874	124	0.00654907	57.6	null					1760.55	22	8675	246	0.0114937	147	Hex5HexNAc4-AA	48.09	1760.64	0.0846594	1352.48	16	5823	16362	0.010036	4374	null					1436.63	74	5717	57700	0.0154191	35814	Hex3HexNAc4-AA	-69.5985
1331.72	11	5877	5245	0.0052523	1293	null				1366.55	4	5449	80	0.0042252	22.2	null					1785.58	17	8771	185	0.00864361	113	Hex3HexNAc5dHex1-AA	48.89	1785.67	0.0872939	1354.57	26	5786	26518	0.0162654	7081	Hex5HexNAc2-AA	-63.55	1354.48	-0.08609		1459.55	8	5100	6513	0.00174046	4894	null
1336.7	7	5661	3158	0.0031624	793	null				1370.51	7	5365	121	0.00639062	33.9	null					1840.55	116	8842	1278	0.059711	827	Hex8HexNAc2-AA	49.11	1840.64	0.0903846	1358.72	11	5645	10797	0.00662258	3155	null					1470.64	11	6012	8545	0.00228347	5281	Hex4HexNAc2Pen1dHex1-AA	-74.6218
1338.6	12	5854	5604	0.0056118	1381	Hex4HexNAc2dHex1-AA	-87.4049	1338.48	-0.117	1373.57	7	5339	126	0.0066547	33.5	null					1906.6	98	9260	1029	0.0480771	663	Hex5HexNAc4dHex1-AA	52.22	1906.7	0.0995682	1366.71	6	5624	6071	0.00372378	1699	null					1500.64	4	5536	5746	0.0015355	1694	Hex5HexNAc2dHex1-AA	-66.0899
1344.73	5	6052	3156	0.00316039	813	null				1379.43	32	5575	565	0.0298405	346	Hex3HexNAc3dHex1-AA	54.77	1379.51	0.075549		1980.73	6	7751	62.5	0.00292014	52.8	Hex5HexNAc3Pen1dHex2-AA	49.8	1981.72	0.986363	1370.68	11	5892	9604	0.00589083	2465	null					1511.66	111	6072	86635	0.0231514	55364	Hex3HexNAc3Pen1dHex1-AA	-68.2645
1354.59	45	6098	20606	0.0206347	4935	Hex5HexNAc2-AA	-83.4832	1354.48	-0.113086	1395.45	7	5282	125	0.00660188	37.6	Hex4HexNAc3-AA	41.9	1395.51	0.058463		1988.64	12	9011	119	0.00555994	82.8	Hex3HexNAc6dHex1-AA	54.64	1988.75	0.108666	1373.7	12	5964	10134	0.00621592	2577	null					1516.63	230	5907	180193	0.0481529	119614	Hex6HexNAc2-AA	-64.1306
1358.73	7	6006	4672	0.0046785	1205	null	0	0	0	1434.42	7	4216	121	0.00639062	112	null					2002.59	262	9622	2527	0.118067	1659	Hex9HexNAc2-AA	50.54	2002.69	0.101208	1379.61	36	5935	30305	0.0185882	7822	Hex3HexNAc3dHex1-AA	-70.64	1379.51	-0.09745		1541.67	117	6094	92512	0.0247219	61206	Hex4HexNAc3dHex1-AA	-69.8124
1366.71	8	5996	3864	0.00386938	953	null	0	0	0	1449.6	5	5683	92.7	0.00489595	26	null					2052.65	9	9037	82	0.00383122	59.1	Hex5HexNAc4dHex2-AA	49.92	2052.75	0.102477	1395.62	7	5503	5724	0.00351094	1574	Hex4HexNAc3-AA	-79.2	1395.51	-0.11054		1557.66	12	6242	9203	0.00245931	6023	Hex5HexNAc3-AA	-64.6567
1370.7	7	6398	4536	0.00454231	1027	null	0	0	0	1467.58	30	6197	565	0.0298405	155	null					2120.68	4	8205	59.9	0.00279866	15.3	Hex3HexNAc6Pen1dHex1-AA	51.36	2120.79	0.108925	1434.58	80	6036	67502	0.0414039	17766	null					1568.68	46	6141	36530	0.00976189	24616	Hex3HexNAc4Pen1-AA	-66.7624
1373.74	7	6001	4202	0.00420785	1035	null	0	0	0	1471.59	6	5340	120	0.00633781	38.3	null					2164.63	14	9359	119	0.00555994	89.4	Hex10HexNAc2-AA	52.22	2164.74	0.113031	1436.61	33	5876	34091	0.0209105	9492	Hex3HexNAc4-AA	-52.2	1436.53	0		1580.66	8	5665	6631	0.001772	5664	null
1379.63	47	5657	21558	0.021588	5924	Hex3HexNAc3dHex1-AA	-85.1325	1379.51	-0.117451	1492.56	6	4411	116	0.00612654	40.1	null					2271.71	12	9260	91.8	0.0042891	74.8	Hex6HexNAc5dHex1-AA	51.4	2271.83	0.116764	1449.78	10	6024	8639	0.00529892	2524	null					1582.7	457	5935	361979	0.0967314	261479	Hex3HexNAc4dHex1-AA	-67.6558
1395.62	15	6346	6857	0.00686654	1625	Hex4HexNAc3-AA	-82.0686	1395.51	-0.114537	1511.5	4	4458	81.1	0.0042833	26.8	Hex3HexNAc3Pen1dHex1-AA	34.28	1511.55	0.051808		2304.96	11	8502	85.4	0.00399008	80.6	null				1467.74	4	5677	4409	0.00270436	1305	null					1596.63	15	5425	11836	0.00316293	9509	null
1419.78	11	6170	4938	0.00494487	1234	null				1516.43	61	6024	1066	0.0563008	712	Hex6HexNAc2-AA	68.41	1516.53	0.103738												1471.78	11	6078	9060	0.00555715	2509	null					1598.7	15	6330	11622	0.00310574	7975	Hex4HexNAc4-AA	-72.6615
1434.59	21	6284	9491	0.00950421	2332	null				1525.47	48	5811	837	0.0442062	581	Hex3HexNAc3dHex2-AA	62.58	1525.57	0.095458												1492.75	6	5698	6063	0.00371888	1824	null					1639.72	10	6346	7977	0.00213169	5665	Hex3HexNAc5-AA	-64.4105
1449.8	11	6395	5152	0.00515917	1278	null				1530.61	7	5157	129	0.00681314	106	null															1494.77	5	5614	5110	0.00313433	1538	null					1662.63	20	5956	15942	0.00426017	12586	Hex6HexNAc2dHex1-AA	-24.8723
1467.77	9	6607	4324	0.00433002	1027	null				1541.47	57	5809	984	0.05197	702	Hex4HexNAc3dHex1-AA	59.92	1541.56	0.092372												1511.67	4	5685	4155	0.00254856	1170	Hex3HexNAc3Pen1dHex1-AA	-78.85	1511.55	0		1672.74	4	5852	6750	0.0018038	1956	null
1471.79	10	6270	4475	0.00448123	1155	null				1582.49	33	5887	559	0.0295236	416	Hex3HexNAc4dHex1-AA	63.14	1582.59	0.099921												1514.55	10	5650	9993	0.00612943	3040	null					1678.69	212	6083	167893	0.0448659	131779	Hex7HexNAc2-AA	-64.0015
1485.81	9	6461	4216	0.00422187	1025	null				1596.45	4	4679	82	0.00433083	29.5	null															1516.63	83	6152	70245	0.0430863	19278	Hex6HexNAc2-AA	-66.11	1516.53	-0.10026		1687.73	36	6206	28234	0.00754495	21873	Hex4HexNAc3dHex2-AA	-66.7872
1492.77	4	5066	2457	0.00246042	786	null				1643.68	4	5133	69.2	0.0036548	23.3	null															1541.68	18	5134	15508	0.00951218	4974	Hex4HexNAc3dHex1-AA	-77.6	1541.56	0		1703.73	18	6341	13954	0.00372892	10735	Hex5HexNAc3dHex1-AA	-65.0364
1494.81	8	6172	3527	0.00353191	987	null				1647.65	4	5419	73.3	0.00387134	24.2	null															1555.89	6	5528	4764	0.00292211	1585	null					1714.75	393	5755	529750	0.141565	168736	Hex3HexNAc4Pen1dHex1-AA	-68.7097
1511.68	4	6216	2994	0.00299817	785	Hex3HexNAc3Pen1dHex1-AA	-84.8013	1511.55	-0.128192	1662.59	4	3963	80	0.0042252	34.3	Hex6HexNAc2dHex1-AA	2.19	1662.59	0.003647												1568.69	5	5761	4376	0.00268412	1304	Hex3HexNAc4Pen1-AA	-73.77	1568.57	0		1728.76	30	5870	23542	0.00629111	20619	Hex3HexNAc4dHex2-AA	-63.7278
1516.65	127	6714	57983	0.0580637	13525	Hex6HexNAc2-AA	-75.3388	1516.53	-0.114262	1666.65	7	5685	109	0.00575684	102	null															1582.69	94	6279	80150	0.0491618	22285	Hex3HexNAc4dHex1-AA	-66.39	1582.59	-0.10508		1744.76	50	6211	39520	0.0105609	32811	Hex4HexNAc4dHex1-AA	-68.3504
1525.68	69	6700	31186	0.0312294	7486	Hex3HexNAc3dHex2-AA	-75.7315	1525.57	-0.115542	1672.6	6	3840	106	0.00559839	147	null															1596.64	46	6314	45278	0.0277723	12719	null					1758.7	6	5131	10270	0.00274445	3799	null
1541.68	88	6641	40113	0.0401688	9810	Hex4HexNAc3dHex1-AA	-77.5956	1541.56	-0.119628	1678.46	69	6167	1139	0.0601563	912	Hex7HexNAc2-AA	73.02	1678.58	0.122561												1598.66	18	6172	18058	0.0110763	5365	Hex4HexNAc4-AA	-45.14	1598.58	-0.07216		1760.75	34	5724	26278	0.00702225	24266	Hex5HexNAc4-AA	-61.5311
1571.76	5	6091	2224	0.0022271	628	null				1687.51	21	5559	340	0.0179571	314	Hex4HexNAc3dHex2-AA	65.94	1687.62	0.111281												1656.87	4	6302	3720	0.00228175	1060	null					1771.77	4	6005	6671	0.00178269	2263	Hex3HexNAc5Pen1-AA	-66.801
1582.71	50	6829	22633	0.0226645	5405	Hex3HexNAc4dHex1-AA	-75.2373	1582.59	-0.119079	1714.59	5	4574	103	0.00543995	39.1	Hex3HexNAc4Pen1dHex1-AA	27.52	1714.63	0.04718												1673.74	4	5779	3816	0.00234063	1174	Hex4HexNAc3Pen1dHex1-AA	-78.49	1673.61	-0.13137		1775.89	17	4617	13002	0.00347452	16036	null
1596.65	13	6728	5819	0.0058271	1488	null				1728.55	10	5658	183	0.00966515	60.4	Hex3HexNAc4dHex2-AA	59.49	1728.65	0.10283												1676.62	8	5504	8259	0.00506584	2922	null					1785.79	92	6261	71336	0.0190631	61370	Hex3HexNAc5dHex1-AA	-67.5926
1647.88	9	6847	4034	0.00403962	1046	null				1744.52	21	5961	333	0.0175874	307	Hex4HexNAc4dHex1-AA	69.21	1744.64	0.120745												1678.7	82	6389	69238	0.0424687	20190	Hex7HexNAc2-AA	-66.38	1678.58	0		1794.67	15	6218	11553	0.0030873	10361	Hex6HexNAc2Pen1dHex1-AA	-19.555
1662.72	13	5718	5845	0.00585314	1885	Hex6HexNAc2dHex1-AA	-78.3977	1662.59	-0.130353	1775.66	13	5567	209	0.0110383	206	null															1687.74	6	6125	5897	0.00361706	1862	Hex4HexNAc3dHex2-AA	-71.53	1687.62	0		1840.75	193	6175	147135	0.0393188	137211	Hex8HexNAc2-AA	-63.352
1666.91	22	6990	9895	0.00990877	2476	null				1788.77	20	5895	305	0.0161086	277	null															1689.82	6	5498	6231	0.00382192	2311	null					1849.77	11	5291	7984	0.00213356	9753	Hex5HexNAc3dHex2-AA	-49.139
1672.86	18	6691	8119	0.0081303	2184	null				1840.51	49	5910	735	0.0388191	746	Hex8HexNAc2-AA	70.3	1840.64	0.129385												1714.75	14	6384	11430	0.00701085	3327	Hex3HexNAc4Pen1dHex1-AA	-68.71	1714.63	0		1860.81	21	6371	15523	0.0041482	14403	Hex3HexNAc4Pen1dHex2-AA	-64.9776
1678.71	172	6999	75872	0.0759776	18882	Hex7HexNAc2-AA	-75.319	1678.58	-0.126439	1860.58	5	6398	84.5	0.00446287	28.2	Hex3HexNAc4Pen1dHex2-AA	60.24	1860.69	0.112089												1728.77	6	6109	4702	0.00288408	1394	Hex3HexNAc4dHex2-AA	-68.93	1728.65	0		1865.77	16	5345	11535	0.00308249	13821	Hex6HexNAc3dHex1-AA	-56.2667
1687.75	55	7057	24027	0.0240604	6083	Hex4HexNAc3dHex2-AA	-75.6741	1687.62	-0.127719	1874.58	6	6081	103	0.00543995	35.8	Hex3HexNAc4dHex3-AA	68.68	1874.71	0.128739												1744.77	7	6415	5867	0.00359866	2004	Hex4HexNAc4dHex1-AA	-73.51	1744.64	-0.12826		1876.81	23	6546	16741	0.00447369	15163	Hex4HexNAc4Pen1dHex1-AA	-66.0677
1703.77	7	6361	2985	0.00298915	883	Hex5HexNAc3dHex1-AA	-89.0992	1703.62	-0.151804	1890.57	18	6336	260	0.0137319	254	Hex4HexNAc4dHex2-AA	71.75	1890.7	0.135654												1758.71	41	6224	32717	0.0200677	10322	null					1890.81	11	6387	8177	0.00218513	7880	Hex4HexNAc4dHex2-AA	-59.417
1714.8	4	5401	3189	0.00319344	1015	Hex3HexNAc4Pen1dHex1-AA	-94.9501	171.463	-0.16282	1906.56	87	6594	1208	0.0638006	1141	Hex5HexNAc4dHex1-AA	72.68	1906.7	0.138568												1775.87	28	6598	22687	0.0139156	6930	null					1906.83	191	6307	137663	0.0367876	132195	Hex5HexNAc4dHex1-AA	-68.927
1728.78	21	7027	9136	0.00914872	2353	Hex3HexNAc4dHex2-AA	-77.0311	1728.65	-0.13317	1951.89	16	6168	212	0.0111968	220	null															1785.79	23	6495	18870	0.0115743	5791	Hex3HexNAc5dHex1-AA	-69.83	1785.67	0		1917.84	87	6212	61995	0.0165669	60917	Hex3HexNAc5Pen1dHex1-AA	-66.4536
1733.95	12	6862	5381	0.00538849	1461	null				1958.77	4	6229	56.6	0.00298933	21.1	null															1840.76	98	6475	78158	0.04794	24970	Hex8HexNAc2-AA	-68.78	1840.64	0		1931.85	31	6333	21629	0.0057799	21065	Hex3HexNAc5dHex2-AA	-65.1174
1744.78	48	7148	20904	0.0209331	5312	Hex4HexNAc4dHex1-AA	-75.8007	1744.64	-0.132255	1980.77	5	5895	76.7	0.00405091	27.5	null															1906.83	63	6800	47947	0.0294094	14845	Hex5HexNAc4dHex1-AA	-67.88	1906.7	0		1947.84	10	6411	6688	0.00178723	6642	Hex4HexNAc5dHex1-AA	-60.0064
1760.76	21	6503	8819	0.00883128	2825	Hex5HexNAc4-AA	-71.1854	1760.64	-0.125341	2002.53	63	6643	768	0.040562	767	Hex9HexNAc2-AA	78.01	2002.69	0.156208												1917.85	4	6320	3450	0.00211613	1301	Hex3HexNAc5Pen1dHex1-AA	-74.27	1917.71	0		1963.86	5	6072	5336	0.00142594	1766	Hex5HexNAc5-AA	-70.2537
1775.89	44	7169	18501	0.0185268	4785	null				2070.86	4	4696	58	0.00306327	27.8	null															1920.77	30	6696	22669	0.0139045	7291	null					1974.86	4	6108	4202	0.0011229	1383	Hex3HexNAc6Pen1-AA	-64.3001
1785.82	6	6006	2672	0.00267572	836	Hex3HexNAc5dHex1-AA	-86.0702	1785.67	-0.153706	2111.82	13	5889	176	0.00929545	74.9	null															1988.88	19	6831	13862	0.00850257	4478	Hex3HexNAc6dHex1-AA	-67.04	1988.75	0		1986.78	4	5921	6058	0.00161888	2074	Hex8HexNAc2dHex1-AA	-40.6219
1819.84	4	6422	1775	0.00177747	512	null				2145.91	4	7241	50.8	0.002683	18.3	null															2002.83	187	6933	134671	0.0826035	43415	Hex9HexNAc2-AA	-69.3	2002.69	0		1988.87	20	6229	12815	0.00342454	13135	Hex3HexNAc6dHex1-AA	-59.498
1824.77	8	6911	3381	0.00338571	969	Hex7HexNAc2dHex1-AA	-67.1484	1824.64	-0.12253	2160.93	18	6558	244	0.0128869	92	null															2052.9	11	6656	7468	0.00458066	2520	Hex5HexNAc4dHex2-AA	-71.37	2052.75	0		2002.82	256	6223	163582	0.0437139	168715	Hex9HexNAc2-AA	-6.43053
1840.78	137	7318	55538	0.0556153	14535	Hex8HexNAc2-AA	-76.3891	1840.64	-0.140615	2164.61	4	3473	54.1	0.00285729	36.3	Hex10HexNAc2-AA	59.15	2164.74	0.128031												2068.9	4	6397	3019	0.00185177	1050	Hex6HexNAc4dHex1-AA	-73.28	2068.75	0		2038.86	8	6536	4939	0.00131985	5179	Hex5HexNAc4Pen1dHex1-AA	-60.9031
1860.83	11	7164	4345	0.00435105	1215	Hex3HexNAc4Pen1dHex2-AA	-75.1875	1860.69	-0.139911	2220.81	5	6605	64.6	0.00341185	34.6	null															2082.84	25	6904	16038	0.00983727	5336	null					2052.89	103	6400	61271	0.0163734	63044	Hex5HexNAc4dHex2-AA	-67.477
1874.85	14	7358	5749	0.005757	1633	Hex3HexNAc4dHex3-AA	-78.0121	1874.71	-0.146261	2222.75	6	5234	71	0.00374987	42.2	null															2120.94	9	6954	6010	0.00368637	2190	Hex3HexNAc6Pen1dHex1-AA	-69.82	2120.79	0		2063.9	45	6309	26178	0.00699553	27720	Hex3HexNAc5Pen1dHex2-AA	-65.1865
1890.85	34	7451	13613	0.0136319	3602	Hex4HexNAc4dHex2-AA	-77.3973	1890.7	-0.146346	2225.87	4	6343	47.1	0.00248759	22.4	null															2125.93	5	6779	3423	0.00209957	1211	Hex6HexNAc5-AA	-73.45	212.577	0		2068.86	8	5534	4605	0.00123059	5964	Hex6HexNAc4dHex1-AA	-53.4635
1906.84	140	7423	54552	0.0546279	14626	Hex5HexNAc4dHex1-AA	-7.78416	1906.7	-0.148432	2228.94	4	5938	47.5	0.00250871	21	null															2134.95	4	6862	2880	0.00176651	1057	Hex3HexNAc6dHex2-AA	-69.05	2134.81	0		2082.79	6	5755	5849	0.00156302	2170	null
1920.79	7	7321	2585	0.0025886	816	null				2271.68	4	5030	44.3	0.00233971	23.4	Hex6HexNAc5dHex1-AA	65.93	2271.83	0.149764												2148.06	4	6628	2455	0.00150583	903	Hex9HexNAc2dHex1-AA	320.34	2148.75	1		2109.92	18	6536	9800	0.00261885	10143	Hex5HexNAc5dHex1-AA	-69.6989
1947.88	5	6880	1723	0.0017254	519	Hex4HexNAc5dHex1-AA	-82.0803	1947.72	-0.159883	2291.93	4	7458	43.2	0.00228161	17.2	null															2162.81	5	6534	3174	0.00194684	1373	Hex2HexNAc7Pen1dHex1-AA	-460.29	2161.82	-1		2120.93	50	6255	51472	0.0137548	18369	Hex3HexNAc6Pen1dHex1-AA	-67.4584
1965.11	6	7262	2370	0.0023733	729	null																									2164.89	29	7011	18104	0.0111045	6367	Hex10HexNAc2-AA	-69.27	2164.74	0		2124.94	6	6160	5765	0.00154058	2529	null
1986.83	7	7164	2637	0.00264067	848	Hex8HexNAc2dHex1-AA	-68.303	1986.7	-0.135707																						2178.06	4	6263	2245	0.00137702	967	Hex3HexNAc7Pen1-AA	-112.77	2177.81	0		2134.94	19	6276	9977	0.00266615	10975	Hex3HexNAc6dHex2-AA	-62.9642
1988.89	10	6872	3537	0.00354192	1094	Hex3HexNAc6dHex1-AA	-70.056	1988.75	-0.139334																						2191.99	5	7005	2884	0.00176897	971	Hex3HexNAc7dHex1-AA	-73.89	2191.83	0		2164.88	36	6363	18003	0.00481093	19872	Hex10HexNAc2-AA	-63.7303
2002.85	180	7640	64343	0.0644326	17382	Hex9HexNAc2-AA	-78.7838	2002.69	-0.157792																						2198.98	5	6590	3179	0.00194991	1246	Hex5HexNAc4dHex3-AA	-75.31	2198.81	0		2184.95	6	6206	4789	0.00127976	1787	Hex5HexNAc4Pen1dHex2-AA	-68.7725
2052.93	7	6950	2342	0.00234526	736	Hex5HexNAc4dHex2-AA	-86.96	2052.75	-0.178523																						2244.91	18	7235	9670	0.00593131	3353	null					2198.96	91	6461	43471	0.0116167	48058	Hex5HexNAc4dHex3-AA	-68.948
2071.14	7	6532	2263	0.00226615	811	null																									2248.98	5	6216	3007	0.00184441	1239	Hex3HexNAc8-AA	-57.58	2248.85	0		2255.99	5	6251	3995	0.00106758	1534	Hex5HexNAc5dHex2-AA	-70.9889
2082.86	5	4806	1564	0.00156618	608	null																									2267.04	4	6952	2261	0.00138683	1171	Hex3HexNAc6Pen1dHex2-AA	-83	2266.85	0		2266.99	13	5664	5481	0.00146468	7674	Hex3HexNAc6Pen1dHex2-AA	-60.5059
2109.95	5	7532	2333	0.00233625	688	Hex5HexNAc5dHex1-AA	-80.5989	2109.77	-0.170059																						2271.99	19	7239	10372	0.0063619	3613	Hex6HexNAc5dHex1-AA	-72.29	2271.83	0		2271.98	42	6385	17372	0.00464231	20636	Hex6HexNAc5dHex1-AA	-66.5657
2112.13	7	6261	3399	0.00340373	1252	null	-164.12	2111.78	-0.346643																						2278.1	8	7195	4378	0.00268534	1809	null					2280.99	16	5748	6497	0.00173619	9299	Hex3HexNAc6dHex3-AA	-55.9037
2128.15	6	7576	2011	0.0020138	626	Hex5HexNAc3Pen1dHex3-AA	-176.082	2127.77	-0.374728																						2318.96	4	5198	1922	0.0011789	897	null					2299.05	5	5784	3843	0.00102696	1682	Hex5HexNAc6Pen1-AA	-90.1838
2150.14	9	7690	2778	0.00278187	823	null																									2358.09	7	6698	4016	0.0024633	1645	null					2313.02	4	6349	3002	0.000802222	1093	Hex5HexNAc6dHex1-AA	-72.0645
2161.2	7	7651	2023	0.00202582	695	null																									2395.08	10	7413	4744	0.00290984	1689	Hex3HexNAc8dHex1-AA	-72.06	2394.91	0		2324.03	22	6478	8462	0.00226129	10077	Hex3HexNAc7Pen1dHex1-AA	-66.9968
2164.92	18	7744	5503	0.00551066	1661	Hex10HexNAc2-AA	-81.2818	2164.74	-0.175969																						2406.98	14	7348	6199	0.0038023	2249	null					2331.01	10	6558	3973	0.0010617	4719	Hex5HexNAc4Pen1dHex3-AA	-65.7894
2198.99	8	7852	2339	0.00234226	674	Hex5HexNAc4dHex3-AA	-80.3161	2198.81	-0.176614																						2418.08	5	7146	2265	0.00138929	868	Hex6HexNAc5dHex2-AA	-79.12	2417.89	0		2395.06	6	6459	3435	0.000917933	1322	Hex3HexNAc8dHex1-AA	-65.3797
2222.97	8	5973	2067	0.00206988	859	null																									2486.99	4	5916	1568	0.000961768	720	null					2402.06	4	6488	2485	0.000664065	952	Hex5HexNAc5dHex3-AA	-69.6243
2226.18	8	6819	2100	0.00210292	831	null																									2527.15	5	7200	1999	0.00122613	783	Hex3HexNAc8Pen1dHex1-AA	-80.46	2526.95	0		2413.07	7	6553	3904	0.00104326	1541	Hex3HexNAc6Pen1dHex3-AA	-65.5835
2272.01	19	7972	4678	0.00468451	1349	Hex6HexNAc5dHex1-AA	-81.0893	2271.83	-0.184236																						2569.05	11	7631	3872	0.00237498	1441	null					2418.05	12	6475	6873	0.00183667	2725	Hex6HexNAc5dHex2-AA	-67.9585
2281.07	6	7440	1489	0.00149107	538	Hex3HexNAc6dHex3-AA	-91.8497	2280.86	-0.209516																						2598.18	4	7775	1282	0.000786343	468	Hex3HexNAc9dHex1-AA	-75.91	2597.99	-0.19722		2445.09	4	6541	2058	0.000549958	806	Hex5HexNAc6Pen1dHex1-AA	-77.4729
2299.05	4	7265	897	0.000898249	295	Hex5HexNAc6Pen1-AA	-91.9235	2298.84	-0.211337																						2638.17	5	7426	1721	0.00105561	638	null					2475.07	4	6462	2108	0.000563319	847	Hex6HexNAc6dHex1-AA	-67.8215
2318.95	6	6868	1550	0.00155216	590	null																									2731.13	10	7230	2771	0.00169965	1151	null					2527.12	20	6486	5116	0.00136715	6898	Hex3HexNAc8Pen1dHex1-AA	-67.4008
2395.11	4	7845	933	0.000934299	297	Hex3HexNAc8dHex1-AA	-82.9143	2394.91	-0.198589																						2801.27	7	7814	1824	0.00111879	726	Hex3HexNAc10dHex1-AA	-72.41	2801.07	-0.20284		2564.11	42	6588	9548	0.00255151	12860	Hex6HexNAc5dHex3-AA	-66.0728
2416.24	17	8219	3571	0.00357597	1141	null	0	0	0																						2893.19	7	7904	1463	0.000897364	606	null					2605.14	4	6602	1832	0.000489564	738	Hex5HexNAc6dHex3-AA	-66.3569
2801.32	4	8584	433	0.000433603	129	Hex3HexNAc10dHex1-AA	-90.2587	2801.07	-0.252843																																	2710.18	32	6676	5549	0.00148286	7997	Hex6HexNAc5dHex4-AA	-66.2352
																																										2730.22	4	6692	1389	0.000371182	598	Hex3HexNAc9Pen1dHex1-AA	-68.8433
																																										2929.26	4	6521	948	0.000253333	456	Hex7HexNAc6dHex3-AA	-628.904
																																										2933.3	4	6758	1147	0.000306512	540	Hex3HexNAc10Pen1dHex1-AA	-65.6546
[truncated: 52 more columns]

## Sheet: (D) Sm N-glycans
Cercariae - Fig. S6-A											Adult worms - Fig. S6-B											Eggs - Fig. S6-C											Eggs (PNG-A) - Fig. S6-D
m/z	S/N	Res.	Intens.	%Intens	Area	Suggested glycan composition	Accuracy (PPM)	Th. m/z	Deviation		m/z	S/N	Res.	Intens.	%Intens	Area	Suggested glycan composition	Accuracy (PPM)	Th. m/z	Deviation		m/z	S/N	Res.	Intens.	%Intens	Area	Suggested glycan composition	Accuracy (PPM)	Th. m/z	Deviation		m/z	S/N	Res.	Intens.	%Intens	Area	Suggested glycan composition	Accuracy (PPM)	Th. m/z	Deviation
828.145	11	7110	4456	0.00103057	885	null					930.627	10	3831	3042	0.00509776	1446	null					948.275	59	4664	17178	0.0518898	3819	null					822.332	10	3272	1436	0.00665456	711	null
829.143	17	7077	6525	0.00150909	1380	null					948.552	150	4522	46210	0.0774383	18805	null					1030.36	6	4185	1716	0.00518354	447	Hex3HexNAc2-AA	16.7587	1030.37	-0.0172675		823.336	19	3332	2592	0.0120116	1211	null
948.415	14	12500	5220	0.00120727	726	null					974.714	65	4227	19704	0.0330198	9069	null					1110.34	37	4844	10489	0.0316842	2642	null					829.395	8	2125	1157	0.00536164	923	null
990.191	16	9434	5765	0.00133332	1195	null					990.318	17	4628	5137	0.00860854	2345	null					1146.4	5	4027	1473	0.00444951	440	Hex2HexNAc2Pen1dHex1-AA	14.4902	1146.42	-0.0166116		930.718	7	2700	925	0.00428654	648	null
991.19	17	8606	5967	0.00138003	1366	null					991.317	17	4260	5087	0.00852475	2498	null					1162.39	6	4278	1723	0.00520468	501	Hex3HexNAc2Pen1-AA	21.9601	1162.42	-0.0255262		946.738	17	2924	2100	0.00973159	1312	null
1014.49	71	11690	23631	0.00546532	4233	Hex2HexNAc2dHex1-AA	-107.096	1014.38	-0.108647		1014.61	138	4683	40123	0.0672378	17518	Hex2HexNAc2dHex1-AA	-224370	1014.38	0.227647		1176.4	20	4359	5671	0.0171304	1641	Hex3HexNAc2dHex1-AA	26.5014	1176.43	-0.0311763		1021.79	25	3199	2890	0.0133925	1839	null
1030.48	162	11677	52584	0.0121615	9736	Hex3HexNAc2-AA	-108.427	1030.37	-0.111733		1030.6	56	4794	16197	0.0271428	7062	Hex3HexNAc2-AA	-220001	1030.37	0.226733		1192.41	5	4215	1529	0.00461867	445	Hex4HexNAc2-AA	13.4944	1192.43	-0.0160909		1146.8	10	2962	1156	0.00535701	959	Hex2HexNAc2Pen1dHex1-AA	-326.465	1146.42	-0.374388
1110.49	14	12518	5073	0.00117327	909	null					1110.6	46	5117	11631	0.0194911	5362	null					1233.44	7	4271	1839	0.00555509	552	Hex3HexNAc3-AA	11.0585	1233.45	-0.01364		1176.8	22	2973	2408	0.0111589	2041	Hex3HexNAc2dHex1-AA	-316.81	1176.43	-0.372824
1146.55	78	12493	25574	0.0059147	5196	Hex2HexNAc2Pen1dHex1-AA	-109.362	1146.42	-0.125388		1150.71	10	4501	2493	0.00417775	1394	null					1272.38	54	4639	15075	0.0455372	4416	null					1196.89	9	3032	1001	0.00463873	887	null
1162.54	107	12420	35427	0.00819347	7421	Hex3HexNAc2Pen1-AA	-110.511	1162.42	-0.128474		1176.66	464	4828	110513	0.185197	60636	Hex3HexNAc2dHex1-AA	-195319	1176.43	0.229824		1297.5	4	5467	1159	0.003501	302	null					1308.88	96	3352	9742	0.0451453	8580	Hex3HexNAc2Pen1dHex1-AA	-311.384	1308.47	-0.407565
1174.54	24	11251	8578	0.0019839	2024	null					1192.66	55	5183	12869	0.0215658	6656	Hex4HexNAc2-AA	-195286	1192.43	0.232909		1308.43	94	4212	25997	0.0785294	8304	Hex3HexNAc2Pen1dHex1-AA	31.6677	1308.47	-0.041435		1331.97	9	3414	855	0.00396215	785	null
1176.56	2625	9942	860026	0.198905	237763	Hex3HexNAc2dHex1-AA	-112.041	1176.43	-0.131824		1196.75	21	4898	4906	0.00822143	2659	null					1354.43	36	4446	9946	0.030044	3165	Hex5HexNAc2-AA	33.1609	1354.48	-0.0449143		1354.92	43	3238	4292	0.0198895	4156	Hex5HexNAc2-AA	-327.757	1354.48	-0.444086
1181.57	41	11018	14020	0.00324251	3478	null					1233.69	16	5418	3589	0.00601442	1882	Hex3HexNAc3-AA	-189967	1233.45	0.23436		1365.45	6	4280	1567	0.00473345	518	Hex3HexNAc3Pen1-AA	31.4172	1365.49	-0.0428987		1370.84	14	5609	1354	0.00627456	855	null
1192.56	48	11867	16216	0.0037504	3633	Hex4HexNAc2-AA	-110.61	1192.43	-0.131909		1271.94	6	5768	1424	0.00238633	761	null					1379.47	16	4076	4523	0.0136627	1524	Hex3HexNAc3dHex1-AA	27.2197	1379.51	-0.0375488		1379.94	20	3249	2042	0.00946282	2057	Hex3HexNAc3dHex1-AA	-310.486	1379.51	-0.428451
1233.59	27	12135	9744	0.00225357	2183	Hex3HexNAc3-AA	-110.539	1233.45	-0.13636		1272.66	26	4674	5952	0.00997431	4038	null					1395.47	5	4099	1233	0.00372454	421	Hex4HexNAc3-AA	22.5468	1395.51	-0.0314634		1396	14	3326	1377	0.00638114	1400	Hex4HexNAc3-AA	-353.536	1395.51	-0.493537
1272.57	14	12259	5269	0.0012186	1167	null					1331.9	22	5545	4649	0.00779075	2631	null					1434.44	26	4096	6965	0.0210392	2410	null					1438.02	10	3494	1005	0.00465726	1026	Hex2HexNAc2Pen1dHex3-AA	359.821	1438.54	0.517429
1306.58	21	10680	7754	0.00179333	2343	Hex2HexNAc2dHex3-AA	-68.7515	1306.49	-0.0898295		1338.73	25	5693	5377	0.00901073	3099	Hex4HexNAc2dHex1-AA	-183756	1338.48	0.246		1470.49	7	3781	1842	0.00556415	703	Hex4HexNAc2Pen1dHex1-AA	21.2571	1470.53	-0.0312584		1470.99	11	3249	1044	0.00483799	1186	Hex4HexNAc2Pen1dHex1-AA	-315.938	1470.53	-0.464742
1308.61	1807	11140	625458	0.144654	183135	Hex3HexNAc2Pen1dHex1-AA	-106.651	1308.47	-0.139565		1344.92	7	6203	1382	0.00231594	725	null					1500.52	4	3842	987	0.00298144	383	Hex5HexNAc2dHex1-AA	11.878	1500.54	-0.0178231		1512.02	23	3551	2170	0.010056	2342	Hex3HexNAc3Pen1dHex1-AA	-311.63	1511.55	-0.471192
1324.6	11	11426	4414	0.00102086	1102	Hex4HexNAc2Pen1-AA	-102.408	1324.47	-0.13565		1354.73	87	5542	18182	0.0304692	10942	Hex5HexNAc2-AA	-186078	1354.48	0.252086		1511.5	35	3983	9546	0.0288357	3635	Hex3HexNAc3Pen1dHex1-AA	36.2604	1511.55	-0.0548075		1517.01	55	3793	5322	0.0246626	5408	Hex6HexNAc2-AA	-314.607	1516.53	-0.477262
1328.58	25	12753	9194	0.00212637	2235	null					1358.92	41	5652	8620	0.0144453	5270	null					1516.47	64	4411	17325	0.0523338	6132	Hex6HexNAc2-AA	39.3926	1516.53	-0.0597377		1542.05	21	3606	2026	0.00938867	2233	Hex4HexNAc3dHex1-AA	-313.627	1541.56	-0.483628
1338.62	65	12685	23477	0.00542971	6004	Hex4HexNAc2dHex1-AA	-105.332	1338.48	-0.141		1379.77	107	5627	22029	0.036916	13539	Hex3HexNAc3dHex1-AA	-184416	1379.51	0.254451		1525.65	8	4798	2218	0.00669993	801	Hex3HexNAc3dHex2-AA	-54.1031	1525.57	0.0825424		1583.06	24	3755	2368	0.0109735	2650	Hex3HexNAc4dHex1-AA	-296.943	1582.59	-0.470079
1354.62	195	12843	69550	0.0160854	18210	Hex5HexNAc2-AA	-106.366	1354.48	-0.144086		1395.76	25	5817	5214	0.00873758	3144	Hex4HexNAc3-AA	-185229	1395.51	0.258537		1541.54	9	3921	2439	0.00736751	962	Hex4HexNAc3dHex1-AA	14.5129	1541.56	-0.0223722		1679.11	67	3901	6481	0.0300336	7820	Hex7HexNAc2-AA	-311.736	1678.58	-0.523439
1365.64	11	11886	4587	0.00106087	1149	Hex3HexNAc3Pen1-AA	-103.323	1365.49	-0.141101		1420.8	6	5580	1316	0.00220534	869	Hex2HexNAc4dHex1-AA	-184334	1420.54	0.261902		1557.5	11	4176	2872	0.00867548	1071	Hex5HexNAc3-AA	35.4971	1557.56	-0.0552868		1688.15	21	3790	2032	0.00941648	2622	Hex4HexNAc3dHex2-AA	-315.563	1687.62	-0.532719
1379.65	289	12710	103810	0.0240089	28607	Hex3HexNAc3dHex1-AA	-104.701	1379.51	-0.144451		1430.92	29	6182	5871	0.00983857	3460	null					1568.53	4	4077	960	0.00289988	376	Hex3HexNAc4Pen1-AA	28.8622	1568.57	-0.0452713		1690.22	15	3512	1476	0.00683992	2007	Hex5HexNAc3Pen1-AA	-368.268	1689.6	-0.622454
1395.65	15	12602	6076	0.00140524	1576	Hex4HexNAc3-AA	-102.129	1395.51	-0.142537		1434.74	16	5789	3289	0.00551168	2129	null					1582.54	15	3854	3892	0.0117566	1582	Hex3HexNAc4dHex1-AA	32.177	1582.59	-0.0509213		1704.14	15	3609	1426	0.00660822	1916	Hex5HexNAc3dHex1-AA	-307.372	1703.62	-0.523804
1436.67	27	12903	10535	0.00243651	2902	Hex3HexNAc4-AA	-98.8307	1436.53	-0.141987		1436.8	54	5725	10934	0.0183231	7064	Hex3HexNAc4-AA	-183038	1436.53	0.262987		1596.48	13	3983	3412	0.0103067	1346	null					1715.15	17	3604	1672	0.0077482	2278	Hex3HexNAc4Pen1dHex1-AA	-301.327	1714.63	-0.51682
1444.63	14	13082	5660	0.00130903	1509	null					1449.96	13	6020	2685	0.0044995	1702	null					1673.58	7	4149	1890	0.00570914	780	Hex4HexNAc3Pen1dHex1-AA	12.9249	1673.61	-0.021631		1729.19	15	3750	1491	0.00690943	1985	Hex3HexNAc4dHex2-AA	-311.805	1728.65	-0.53917
1460.63	12	13861	5152	0.00119154	1283	null					1467.94	7	5770	1338	0.00224221	909	Hex3HexNAc2dHex3-AA					1678.51	63	4446	16106	0.0486516	6218	Hex7HexNAc2-AA	42.6337	1678.58	-0.0715612		1745.18	27	3829	2600	0.0120486	3454	Hex4HexNAc4dHex1-AA	-308.424	1744.64	-0.538255
1470.67	49	13382	19704	0.0045571	5590	Hex4HexNAc2Pen1dHex1-AA	-97.0589	1470.53	-0.142742		1492.95	7	4936	1140	0.0019104	922	null					1689.64	7	5180	1703	0.00514427	619	Hex5HexNAc3Pen1-AA	-25.1263	1689.6	0.0424544		1759.16	18	3913	1764	0.00817454	2343	null
1500.68	13	12239	5473	0.00126578	1630	Hex5HexNAc2dHex1-AA	-94.0754	1500.54	-0.141177		1500.8	7	5969	1066	0.00178639	749	Hex5HexNAc2dHex1-AA	-173359	1500.54	0.260177		1703.56	13	3807	3192	0.00964211	1377	Hex5HexNAc3dHex1-AA	34.7483	1703.62	-0.0591957		1761.22	16	3707	1567	0.00726162	2194	Hex5HexNAc4-AA	-332.349	1760.64	-0.585341
1511.7	131	13012	52271	0.0120891	16174	Hex3HexNAc3Pen1dHex1-AA	-96.7074	1511.55	-0.146192		1516.8	124	6054	18765	0.0314462	12678	Hex6HexNAc2-AA	-179497	1516.53	0.272262		1714.57	20	3937	4951	0.0149555	2148	Hex3HexNAc4Pen1dHex1-AA	33.9327	1714.63	-0.0581801		1786.21	10	3870	940	0.00435605	1295	Hex3HexNAc5dHex1-AA	-304.95	1785.67	-0.544706
1516.68	235	13063	92904	0.0214866	29224	Hex6HexNAc2-AA	-97.0952	1516.53	-0.147262		1541.84	175	5968	25771	0.0431868	18331	Hex4HexNAc3dHex1-AA	-178117	1541.56	0.274628		1719.57	6	4067	1415	0.0042743	596	Hex6HexNAc3-AA	26.8151	1719.61	-0.0461103		1834.25	25	4031	2427	0.0112469	3390	Hex4HexNAc3dHex3-AA	-311.74	1833.68	-0.57181
1525.71	34	12782	14153	0.00327327	4449	Hex3HexNAc3dHex2-AA	-92.7715	1525.57	-0.141542		1557.83	8	6194	1220	0.00204447	867	Hex5HexNAc3-AA	-175060	1557.56	0.272713		1728.61	7	3722	1622	0.00489959	758	Hex3HexNAc4dHex2-AA	22.4632	1728.65	-0.0388301		1841.2	74	4076	7152	0.033143	10009	Hex8HexNAc2-AA	-305.027	1840.64	-0.561615
1541.71	212	13233	84964	0.0196503	27124	Hex4HexNAc3dHex1-AA	-94.4587	1541.56	-0.145628		1582.87	595	5691	84898	0.142271	67303	Hex3HexNAc4dHex1-AA	-179470	1582.59	0.284079		1744.6	13	3976	3041	0.00918598	1332	Hex4HexNAc4dHex1-AA	23.3548	1744.64	-0.0407448		1849.29	9	2941	816	0.00378142	1842	Hex5HexNAc3dHex2-AA	208.245	1849.67	0.385104
1568.72	8	7512	4011	0.000927655	2099	Hex3HexNAc4Pen1-AA	-91.6218	1568.57	-0.143729		1596.82	8	5923	1128	0.00189029	890	null					1758.55	7	3952	1796	0.0054252	791	null					1861.25	24	3984	2345	0.0108669	3445	Hex3HexNAc4Pen1dHex2-AA	-300.825	1860.69	-0.559911
1582.74	106	12834	44303	0.0102463	15224	Hex3HexNAc4dHex1-AA	-92.295	1582.59	-0.146079		1598.86	13	5916	1863	0.003122	1460	Hex4HexNAc4-AA	-173976	1598.58	0.278164		1760.63	15	4458	3765	0.011373	1518	Hex5HexNAc4-AA	4.91834	1760.64	-0.00865938		1866.35	24	3845	2362	0.0109457	3602	Hex6HexNAc3dHex1-AA	-367.016	1865.67	-0.684981
1645.75	10	11790	4713	0.00109001	1654	null					1631.09	17	5681	2376	0.00398168	1956	Hex4HexNAc2dHex3-AA					1785.63	8	3679	1883	0.005688	913	Hex3HexNAc5dHex1-AA	23.6857	1785.67	-0.0422939		1875.29	14	4411	1376	0.00637651	1828	Hex3HexNAc4dHex3-AA	-310.492	1874.71	-0.582261
1657.75	28	13457	12512	0.00289375	4268	Hex3HexNAc3Pen1dHex2-AA	-85.8292	1657.61	-0.142284		1644.1	34	6625	4579	0.00767345	3392	null					1803.63	5	3835	1280	0.00386651	592	Hex3HexNAc3Pen1dHex3-AA	20.3063	1803.67	-0.0366252		1877.25	21	3906	2068	0.0095833	3114	Hex4HexNAc4Pen1dHex1-AA	-299.905	1876.69	-0.562996
1673.75	157	12888	67945	0.0157142	25793	Hex4HexNAc3Pen1dHex1-AA	-85.06	1673.61	-0.142369		1678.88	47	6606	6069	0.0101704	4580	Hex7HexNAc2-AA	-175974	1678.58	0.295439		1840.57	71	4359	16443	0.0496695	6917	Hex8HexNAc2-AA	38.7841	1840.64	-0.0713846		1891.28	17	3886	1588	0.00735894	2417	Hex4HexNAc4dHex2-AA	-306.325	1890.7	-0.579346
1678.73	136	12981	59244	0.0137018	22490	Hex7HexNAc2-AA	-86.0406	1678.58	-0.144439		1687.92	23	6452	2959	0.00495867	2334	Hex4HexNAc3dHex2-AA	-175198	1687.62	0.295719		1860.65	11	3894	2566	0.00775114	1226	Hex3HexNAc4Pen1dHex2-AA	19.9333	1860.69	-0.0370889		1907.27	124	4094	11863	0.0549742	17368	Hex5HexNAc4dHex1-AA	-301.18	1906.7	-0.574432
1685.74	24	10552	11061	0.00255816	4952	null					1703.91	10	6486	1235	0.0020696	1006	Hex5HexNAc3dHex1-AA	-172429	1703.62	0.293804		1865.63	6	3820	1294	0.0039088	638	Hex6HexNAc3dHex1-AA	21.4507	1865.67	-0.0400191		1918.27	10	3593	965	0.0044719	1620	Hex3HexNAc5Pen1dHex1-AA	-293.205	1917.71	-0.562447
1687.76	1392	10885	598617	0.138447	284599	Hex4HexNAc3dHex2-AA	-83.9685	1687.62	-0.141719		1719.91	8	6789	918	0.00153838	717	Hex6HexNAc3-AA	-174364	1719.61	0.29989		1874.75	5	4063	1081	0.00326539	526	Hex3HexNAc4dHex3-AA	-21.4755	1874.71	0.0402611		1948.3	25	4079	2377	0.0110152	3591	Hex4HexNAc5dHex1-AA	-295.582	1947.72	-0.575883
1703.76	14	11817	6936	0.00160414	2727	Hex5HexNAc3dHex1-AA	-81.4697	1703.62	-0.138804		1728.95	31	6740	3608	0.00604626	2830	Hex3HexNAc4dHex2-AA	-174771	1728.65	0.30217		1876.64	10	3877	2285	0.00690232	1119	Hex4HexNAc4Pen1dHex1-AA	24.5138	1876.69	-0.0460035		2003.29	132	4188	12114	0.0561374	18392	Hex9HexNAc2-AA	-301.4	2002.69	-0.603792
1714.78	59	12604	25985	0.00600975	10369	Hex3HexNAc4Pen1dHex1-AA	-85.0372	1714.63	-0.14582		1744.95	45	6574	5211	0.00873255	4288	Hex4HexNAc4dHex1-AA	-176656	1744.64	0.308255		1890.66	7	3862	1478	0.00446461	737	Hex4HexNAc4dHex2-AA	22.0312	1890.7	-0.0416536		2007.35	50	3997	4549	0.0210805	7253	Hex3HexNAc4Pen1dHex3-AA	-298.903	2006.75	-0.600002
1728.79	84	12348	37109	0.00858248	15403	Hex3HexNAc4dHex2-AA	-82.815	1728.65	-0.14317		1760.96	27	5913	3048	0.00510781	2926	Hex5HexNAc4-AA	-181345	1760.64	0.319341		1906.64	37	3889	8086	0.0244255	3879	Hex5HexNAc4dHex1-AA	28.0956	1906.7	-0.0535682		2023.36	23	3660	2083	0.00965281	3639	Hex4HexNAc4Pen1dHex2-AA	-304.488	2022.74	-0.616088
1744.79	33	12882	15131	0.00349946	5926	Hex4HexNAc4dHex1-AA	-81.5317	1744.64	-0.142255		1785.98	54	6581	6036	0.0101151	5214	Hex3HexNAc5dHex1-AA	-176769	1785.67	0.315706		1917.65	11	3785	2430	0.00734033	1233	Hex3HexNAc5Pen1dHex1-AA	31.055	1917.71	-0.0595526		2038.36	13	3990	1179	0.00546359	1913	Hex5HexNAc4Pen1dHex1-AA	186.34	2038.74	0.379827
1760.78	35	12874	15755	0.00364378	6358	Hex5HexNAc4-AA	-81.9753	1760.64	-0.144341		1801.98	7	6466	721	0.00120825	654	Hex4HexNAc5-AA	-174692	1801.66	0.314792		1934.71	4	4725	900	0.00271864	406	null					2053.38	102	4225	9189	0.0425827	14195	Hex5HexNAc4dHex2-AA	-303.657	2052.75	-0.623523
1777.79	8	13584	4157	0.000961421	1419	null					1840.97	24	6552	2606	0.00436711	2398	Hex8HexNAc2-AA	-180131	1840.64	0.331615		1947.66	13	3869	2756	0.00832508	1336	Hex4HexNAc5dHex1-AA	30.3529	1947.72	-0.0591173		2064.36	10	3493	879	0.00407337	1647	Hex3HexNAc5Pen1dHex2-AA	-286.548	2063.77	-0.591539
1806.8	25	12044	11372	0.00263009	5012	null					1843.04	9	7407	936	0.00156854	794	Hex3HexNAc6-AA	-187323	1842.69	0.345242		1965.71	4	3824	811	0.0024498	416	Hex4HexNAc3Pen1dHex3-AA	5.82415	1965.72	-0.0114486		2080.37	10	3635	903	0.00418459	1648	Hex4HexNAc5Pen1dHex1-AA	-293.036	2079.76	-0.609624
1819.81	1082	11143	468618	0.108381	251337	Hex4HexNAc3Pen1dHex2-AA	-77.7337	1819.66	-0.14146		1907.03	93	6795	8526	0.0142878	7893	Hex5HexNAc4dHex1-AA	-176941	1906.7	0.337432		1988.7	5	3762	911	0.00275187	483	Hex3HexNAc6dHex1-AA	23.9686	1988.75	-0.0476664		2094.4	24	3937	2066	0.00957403	3513	Hex4HexNAc5dHex2-AA	-297.447	2093.78	-0.622974
1835.79	9	9303	4832	0.00111753	2848	Hex5HexNAc3Pen1dHex1-AA	-71.1114	1835.66	-0.130546		1948.07	82	6931	4768	0.00799017	4432	Hex4HexNAc5dHex1-AA	-177038	1947.72	0.344883		2002.62	113	4294	22827	0.0689537	10496	Hex9HexNAc2-AA	36.5562	2002.69	-0.073208		2110.4	36	4107	3084	0.0142915	5069	Hex5HexNAc5dHex1-AA	-295.233	2109.77	-0.623059
1840.79	71	12553	31327	0.00724524	14554	Hex8HexNAc2-AA	-80.1915	1840.64	-0.147615		1989.1	409	6588	21776	0.036492	21962	Hex3HexNAc6dHex1-AA	-178137	1988.75	0.354334		2022.68	7	3867	1337	0.00403869	682	Hex4HexNAc4Pen1dHex2-AA	29.6202	2022.74	-0.0599123		2121.4	12	3856	1013	0.00469434	1840	Hex3HexNAc6Pen1dHex1-AA	-288.052	2120.79	-0.611075
1849.82	13	12633	6513	0.00150631	2764	Hex5HexNAc3dHex2-AA	-76.1674	1849.67	-0.140896		2003.05	43	6767	2215	0.00371188	2192	Hex9HexNAc2-AA	-178125	2002.69	0.356792		2052.68	27	3844	5201	0.0157107	2631	Hex5HexNAc4dHex2-AA	34.8213	2052.75	-0.071477		2153.43	26	4056	2174	0.0100745	3713	Hex3HexNAc4Pen1dHex4-AA	-292.135	2152.81	-0.629094
1860.83	66	12370	29263	0.00676788	13978	Hex3HexNAc4Pen1dHex2-AA	-76.7995	1860.69	-0.142911		2053.12	18	7055	827	0.00138588	805	Hex5HexNAc4dHex2-AA	-176572	2052.75	0.362523		2063.72	4	4049	853	0.00257667	482	Hex3HexNAc5Pen1dHex2-AA	22.0288	2063.77	-0.0454614		2165.4	16	4087	1336	0.00619115	2285	Hex10HexNAc2-AA	-302.47	2164.74	-0.654969
1873.83	11	11684	5491	0.00126995	2449	null					2094.14	12	6921	479	0.000802704	498	Hex4HexNAc5dHex2-AA	-173328	2093.78	0.362974		2068.75	4	3889	729	0.0022021	427	null					2169.44	48	4312	3907	0.0181054	6305	Hex4HexNAc4Pen1dHex3-AA	-294.629	2168.8	-0.639179
1876.83	29	12659	13023	0.00301193	5910	Hex4HexNAc4Pen1dHex1-AA	-77.7888	1876.69	-0.145996		2110.15	11	6713	431	0.000722266	464	Hex5HexNAc5dHex1-AA	-175845	2109.77	0.371059		2079.65	9	3851	1603	0.0048422	955	Hex4HexNAc5Pen1dHex1-AA	53.5551	2079.76	-0.111376		2185.44	12	4231	957	0.00443483	1588	Hex5HexNAc4Pen1dHex2-AA	-295.713	2184.8	-0.646264
1890.85	136	12085	58073	0.013431	29503	Hex4HexNAc4dHex2-AA	-76.3396	1890.7	-0.144346		2135.18	16	6953	589	0.000987041	621	Hex9HexNAc2Pen1-AA	-207259	2134.73	0.442533		2093.84	28	5330	5198	0.0157017	2354	Hex4HexNAc5dHex2-AA	-30.0758	2093.78	0.0629739		2199.48	81	4446	6518	0.030205	10429	Hex5HexNAc4dHex3-AA	-303.533	2198.81	-0.667614
1906.84	135	12269	57006	0.0131842	28767	Hex5HexNAc4dHex1-AA	-75.7441	1906.7	-0.144432		2199.19	6	6479	182	0.000304994	215	Hex5HexNAc4dHex3-AA	-171706	2198.81	0.377614		2109.7	20	3864	3467	0.0104728	1805	Hex5HexNAc5dHex1-AA	34.0999	2109.77	-0.0719407		2210.47	19	4065	1495	0.00692797	2643	Hex3HexNAc5Pen1dHex3-AA	-292.078	2209.83	-0.64563
1938.84	21	11847	8972	0.00207502	4457	Hex5HexNAc2dHex4-AA	-66.767	1938.71	-0.12945		2272.22	20	7552	509	0.000852978	528	Hex6HexNAc5dHex1-AA	-171302	2271.83	0.389236		2120.81	7	4261	1190	0.00359464	621	Hex3HexNAc6Pen1dHex1-AA	-8.05111	2120.79	0.0170749		2240.5	27	4191	2120	0.00982428	3692	Hex4HexNAc5dHex3-AA	-297.284	2239.84	-0.666065
1947.86	9	13505	4346	0.00100513	1733	Hex4HexNAc5dHex1-AA	-70.2734	1947.72	-0.136883		2281.25	9	6977	221	0.00037035	257	Hex3HexNAc6dHex3-AA	-169432	2280.86	0.386516		2152.74	13	3923	2218	0.00669993	1197	Hex3HexNAc4Pen1dHex4-AA	30.1506	2152.81	-0.0649065		2267.52	21	4126	1613	0.00747479	2890	Hex3HexNAc6Pen1dHex2-AA	-297.314	2266.85	-0.674166
1955.81	8	13997	3945	0.00091239	1616	null					2395.32	18	7331	294	0.000492683	335	Hex3HexNAc8dHex1-AA	-171830	2394.91	0.411589		2164.68	14	4637	2428	0.00733428	1283	Hex10HexNAc2-AA	31.428	2164.74	-0.0680315		2272.5	385	4322	29134	0.13501	49993	Hex6HexNAc5dHex1-AA	-296.693	2271.83	-0.674236
1981.85	9	13215	4062	0.00093945	1703	Hex5HexNAc3Pen1dHex2-AA	-68.944	1981.72	-0.136637													2168.72	19	3822	3315	0.0100137	1808	Hex4HexNAc4Pen1dHex3-AA	35.4223	2168.8	-0.0768211		2281.47	14	3632	892	0.00413361	2181	Hex3HexNAc6dHex3-AA	-265.844	2280.86	-0.606516
1988.88	12	10809	5162	0.00119386	2736	Hex3HexNAc6dHex1-AA	-64.5257	1988.75	-0.128334													2177.82	5	5370	750	0.00226553	359	Hex3HexNAc7Pen1-AA	-3.03567	2177.81	0.00661114		2299.53	24	4243	1768	0.00819307	3141	Hex5HexNAc6Pen1-AA	-301.512	2298.84	-0.693337
2002.83	125	11941	48382	0.0111897	26619	Hex9HexNAc2-AA	-71.7942	2002.69	-0.143792													2184.79	4	4012	673	0.00203294	375	Hex5HexNAc4Pen1dHex2-AA	3.08302	2184.8	-0.00673574		2314.53	37	4244	2688	0.0124564	4850	Hex4HexNAc4Pen1dHex4-AA	141.597	2314.86	0.32773
2006.89	60	11602	23392	0.00541005	13289	Hex3HexNAc4Pen1dHex3-AA	-71.2556	2006.75	-0.143002													2198.74	7	4132	1191	0.00359767	600	Hex5HexNAc4dHex3-AA	33.3763	2198.81	-0.0733858		2331.53	16	4191	1096	0.00507896	2009	Hex5HexNAc4Pen1dHex3-AA	-290.091	2330.85	-0.676355
2022.88	79	11897	30473	0.00704772	16747	Hex4HexNAc4Pen1dHex2-AA	-70.2401	2022.74	-0.142088													2209.76	10	3930	1611	0.00486636	851	Hex3HexNAc5Pen1dHex3-AA	31.8452	2209.83	-0.0703702		2345.58	44	4529	3081	0.0142776	5291	Hex5HexNAc4dHex4-AA	-304.703	2344.87	-0.714705
2035.89	12	15749	5251	0.00121444	1984	null																2271.76	189	3899	27430	0.0828581	15296	Hex6HexNAc5dHex1-AA	31.5897	2271.83	-0.0717641		2356.56	12	4109	857	0.00397142	1626	Hex3HexNAc5Pen1dHex4-AA	-286.316	2355.89	-0.674721
2038.88	133	11802	49689	0.011492	27990	Hex5HexNAc4Pen1dHex1-AA	-71.2023	2038.74	-0.145173													2298.8	11	3886	1537	0.00464283	886	Hex5HexNAc6Pen1-AA	17.6889	2298.84	-0.0406632		2386.61	17	4332	1136	0.00526433	2132	Hex4HexNAc5dHex4-AA	-300.072	2385.9	-0.716156
2052.9	143	11769	52333	0.0121035	29895	Hex5HexNAc4dHex2-AA	-69.9124	2052.75	-0.143523													2314.8	12	4034	1697	0.00512614	970	Hex4HexNAc4Pen1dHex4-AA	25.3715	2314.86	-0.0587299		2413.61	11	4067	747	0.00346167	1486	Hex3HexNAc6Pen1dHex3-AA	-291.786	2412.91	-0.704257
2093.91	11	12269	4448	0.00102872	2200	Hex4HexNAc5dHex2-AA	-63.505	2093.78	-0.132974													2323.82	4	4211	571	0.00172483	321	Hex3HexNAc7Pen1dHex1-AA	20.3534	2323.87	-0.0472977		2418.59	21	4327	1364	0.0063209	2548	Hex6HexNAc5dHex2-AA	-291.214	2417.89	-0.704327
2109.91	9	12714	3633	0.000840232	1696	Hex5HexNAc5dHex1-AA	-64.4858	2109.77	-0.136059													2330.81	5	4125	694	0.00209637	396	Hex5HexNAc4Pen1dHex3-AA	20.0122	2330.85	-0.0466445		2445.59	11	4116	705	0.00326703	1407	Hex5HexNAc6Pen1dHex1-AA	-285.586	2444.9	-0.698428
2120.9	13	10338	4784	0.00110643	2895	Hex3HexNAc6Pen1dHex1-AA	-51.9	2120.79	-0.110075													2355.82	6	3881	736	0.00222324	433	Hex3HexNAc5Pen1dHex4-AA	28.5587	2355.89	-0.067279		2460.63	22	4203	1348	0.00624676	2669	Hex6HexNAc6Pen1-AA	106.675	2460.89	0.262487
2152.94	13	12473	4675	0.00108122	2375	Hex3HexNAc4Pen1dHex4-AA	-63.2128	2152.81	-0.136094													2412.86	5	3848	616	0.00186076	407	Hex3HexNAc6Pen1dHex3-AA	17.7145	2412.91	-0.0427427		2527.67	32	4403	1866	0.00864722	3651	Hex3HexNAc8Pen1dHex1-AA	-285.769	2526.95	-0.72233
2168.94	14	11897	4886	0.00113002	2636	Hex4HexNAc4Pen1dHex3-AA	-62.786	2168.8	-0.136179													2417.83	9	4030	1046	0.00315966	638	Hex6HexNAc5dHex2-AA	24.2668	2417.89	-0.058673		2591.7	11	4311	567	0.00262753	1177	Hex5HexNAc6Pen1dHex2-AA	-286.499	2590.95	-0.742519
2184.94	290	11598	87846	0.0203168	55386	Hex5HexNAc4Pen1dHex2-AA	-64.6537	2184.8	-0.141264													2428.88	4	3979	521	0.00157379	332	Hex4HexNAc6Pen1dHex2-AA	8.09318	2428.9	-0.0196574		2673.8	82	4723	3893	0.0180405	7733	Hex3HexNAc8Pen1dHex2-AA	-295.243	2673.01	-0.789421
2198.95	124	11546	37282	0.00862249	23636	Hex5HexNAc4dHex3-AA	-64.4007	2198.81	-0.141614													2444.86	5	3917	521	0.00157379	343	Hex5HexNAc6Pen1dHex1-AA	16.1858	2444.9	-0.039572		2819.88	13	4048	525	0.0024329	1324	Hex3HexNAc8Pen1dHex3-AA	-289.201	2819.07	-0.815512
2225.95	11	12045	3805	0.000880012	2083	Hex4HexNAc5Pen1dHex2-AA	-58.7232	2225.82	-0.130715													2459.84	4	4222	490	0.00148015	284	Hex4HexNAc4Pen1dHex5-AA	43.6466	2460.92	-1.07364		2965.98	28	4709	896	0.00415215	2113	Hex3HexNAc8Pen1dHex4-AA	-288.473	2965.12	-0.855603
2240.96	15	11925	4858	0.00112355	2745	Hex5HexNAc5Pen1dHex1-AA	38.1175	2241.82	0.854199													2470.91	4	4296	467	0.00141067	280	null
2255.97	12	11816	3970	0.000918172	2214	Hex5HexNAc5dHex2-AA	-62.5674	2255.83	-0.14115													2486.93	6	9423	659	0.00199065	202	null
2329	20	32806	5267	0.00121814	1162	Hex6HexNAc6-AA	-64.3075	2328.85	-0.149772													2501.88	4	4236	469	0.00141671	282	Hex5HexNAc7Pen1-AA	14.4034	2501.92	-0.0360357
2331	298	11415	72383	0.0167406	50588	Hex5HexNAc4Pen1dHex3-AA	-62.3576	2330.85	-0.145355													2526.87	9	4185	969	0.00292707	560	Hex3HexNAc8Pen1dHex1-AA	30.7377	2526.95	-0.0776702
2372.02	13	11180	3362	0.000777556	2126	Hex4HexNAc5Pen1dHex3-AA	-58.5182	2371.88	-0.138806													2631.98	4	7128	391	0.0011811	225	null
2388.02	32	11728	7391	0.00170937	4846	Hex5HexNAc5Pen1dHex2-AA	-62.3493	2387.88	-0.148892													2648.13	5	5667	382	0.00115391	222	Hex5HexNAc7Pen1dHex1-AA	-57.42	2647.98	0.152055
2402.03	18	11405	4376	0.00101207	2937	Hex5HexNAc5dHex3-AA	-57.9683	2401.89	-0.139242
2534.09	50	11360	8832	0.00204264	6722	Hex5HexNAc5Pen1dHex3-AA	-60.3701	2533.93	-0.152983
2680.15	27	11368	3794	0.000877467	3034	Hex5HexNAc5Pen1dHex4-AA	-59.7258	2679.99	-0.160074

## Sheet: (E) Sh O-glycans
Cercariae - technical replicate #2 - Fig S1-C.1											Cercariae - technical replicate #1 - Fig 4, S1-C.1												Eggs - technical replicate #1 - Fig 4, S1-C.2											Eggs - technical replicate #2 - Fig S1-C.2
m/z	S/N	Res.	Intens.	%Intens.	Area	Suggested glycan composition	Charge	Accuracy (PPM)	Th. m/z	Deviation	m/z	S/N	Res.	Intens.	%Intens.	Area	Suggested glycan composition	Charge	Accuracy (PPM)	Th. m/z	Deviation		m/z	S/N	Res.	Intens.	%Intens.	Area	Suggested glycan composition	Charge	Accuracy (PPM)	Th. m/z	Deviation	m/z	S/N	Res.	Intens.	%Intens.	Area	Suggested glycan composition	Charge	Accuracy (PPM)	Th. m/z	Deviation
738.237	186	5643	74733	0.156435	15829	Hex2HexNAc1-redEnd	Na	20.4888	738.388	0.151256	706.183	329	4903	34913	0.0203211	4916	null						700.208	57	5646	7137	0.0345345	1400	null					738.243	35	5525	4042	0.0136742	874	Hex2HexNAc1-redEnd	Na	196.759	738.388	0.145256
779.278	9	5603	4286	0.00897168	990	Hex1HexNAc2-redEnd	Na	17.5554	779.415	0.136805	719.953	204	4912	21514	0.0125222	3101	null						740.566	8	5358	943	0.00456299	213	null					779.272	34	5748	3964	0.0134103	891	Hex1HexNAc2-redEnd	Na	183.254	779.415	0.142805
942.357	70	6405	36431	0.0762593	9746	Hex3HexNAc1-redEnd	Na	13.9045	942.488	0.13103	740.557	1800	5006	188502	0.109717	27361	null						781.033	16	5641	2008	0.00971632	462	null					901.326	85	6165	18337	0.0620345	4764	null
967.363	4	5564	1904	0.00398555	333	null					781.053	182	4684	18800	0.0109425	3188	null						901.994	83	6535	9487	0.0459057	2325	null					926.339	4	5571	986	0.00333566	163	null
969.379	4	5493	1719	0.0035983	310	null					795.942	176	5067	18237	0.0106148	2859	null						939.83	13	5836	1453	0.00703078	431	null					939.358	12	6356	2825	0.00955703	757	null
983.388	161	6484	74471	0.155887	20999	Hex2HexNAc2-redEnd	Na	12.8717	983.515	0.126579	942.81	878	5543	87704	0.051048	14786	Hex3HexNAc1-redEnd	Na	-341.501	942.488	-0.32197		942.807	25	6411	2850	0.0137906	765	Hex3HexNAc1-redEnd	Na	-338.32	942.488	0.31897	942.364	45	6295	10773	0.0364453	2930	Hex3HexNAc1-redEnd	Na	131.615	942.488	0.12403
1157.48	18	7367	8648	0.0181024	2807	Hex2HexNAc2dHex1-redEnd	Na	10.8674	1157.6	0.125788	967.745	5	4026	8130	0.00473205	1881	null						954.851	5	5143	614	0.00297102	115	null					967.362	4	5682	1055	0.00356909	174	null
1173.47	5	6350	2172	0.00454654	377	null					969.788	5	4636	7870	0.00458072	1685	null						967.73	4	4260	471	0.00227908	105	null					969.378	5	5734	1104	0.00373486	183	null
1187.49	210	7028	101188	0.211812	35908	Hex3HexNAc2-redEnd	Na	10.4719	1187.61	0.124352	983.666	2617	5658	266862	0.155327	44824	Hex2HexNAc2-redEnd	Na	-153.936	983.515	-0.151421		969.751	4	4449	487	0.0023565	105	null					983.387	35	6511	8331	0.0281839	2342	Hex2HexNAc2-redEnd	Na	129.734	983.515	0.127579
1345.54	4	6832	2033	0.00425558	369	null					1013.66	4	5091	7335	0.00426933	1480	null						983.667	37	6539	4031	0.0195052	1129	Hex2HexNAc2-redEnd	Na	-154.952	983.515	0.152421	1024.41	15	6859	3562	0.0120503	1012	Hex1HexNAc3-redEnd	Na	127.027	1024.54	0.130128
1347.55	4	6829	1879	0.00393322	338	null					1151.53	28	6009	3375	0.00196441	641	null						1008.62	4	4596	450	0.00217746	99.9	null					1105.43	8	7055	1806	0.00610974	567	Hex1HexNAc2dHex2-redEnd	H	161.275	1105.61	0.178278
1361.57	118	7896	54937	0.114997	22021	Hex3HexNAc2dHex1-redEnd	Na	9.51555	1361.7	0.129561	1157.45	202	6186	24373	0.0141863	4414	Hex2HexNAc2dHex1-redEnd	Na	136.324	1157.6	0.157788		1010.65	4	4805	430	0.00208069	92.3	null					1129.46	4	6276	912	0.00308532	153	null
1391.58	26	8169	11990	0.0250981	4830	Hex4HexNAc2-redEnd	Na	9.56653	1391.71	0.133126	1165.52	23	5904	2813	0.0016373	554	Hex3HexNAc2-redEnd	H	96.4442	1165.63	0.112408		1024.57	25	6598	2615	0.0126535	774	Hex1HexNAc3-redEnd	Na	-32.0838	1024.54	0.0328722	1141.45	53	6959	12816	0.0433568	4303	null
1549.63	5	7369	1794	0.00375529	346	null					1171.44	38	5321	4715	0.00274436	1084	null						1105.46	9	6435	821	0.00397266	288	Hex1HexNAc2dHex2-redEnd	H	138.656	1105.61	-0.153278	1143.46	16	7102	3906	0.0132141	1300	null
1565.66	181	8435	64452	0.134914	31276	Hex4HexNAc2dHex1-redEnd	Na	9.02716	1565.8	0.141335	1173.46	30	5552	3717	0.00216347	802	null						1129.46	9	7029	875	0.00423395	286	null					1146.46	16	7126	3918	0.0132547	1293	Hex4HexNAc1-redEnd	Na	108.859	1146.59	0.124803
1636.69	9	9016	3125	0.00654141	1553	Hex4HexNAc3-redEnd	Na	9.19225	1636.84	0.150449	1187.44	2784	6380	344629	0.200591	61100	Hex3HexNAc2-redEnd	Na	146.83	1187.61	0.174352		1141.42	50	7163	4521	0.0218762	1479	null					1157.48	223	6993	53311	0.180352	18223	Hex2HexNAc2dHex1-redEnd	Na	108.674	1157.6	0.125788
1720.74	81	9024	23359	0.0488963	12803	Hex1HexNAc3dHex4-redEnd	Na	9.00562	1720.9	0.154964	1201.47	108	6269	13731	0.00799211	2583	null						1143.45	11	7123	979	0.00473719	322	null					1171.46	12	7198	2748	0.00929654	931	null
2014.84	4	8389	474	0.000992202	104	Hex5HexNAc3dHex1-redEnd	Na	9.20325	2015.03	0.185431	1325.62	17	6566	2357	0.00137189	473	null						1146.44	12	6954	1108	0.00536139	375	Hex4HexNAc1-redEnd	Na	129.796	1146.59	-0.148803	1173.48	10	7295	2359	0.00798055	791	null
2163.98	12	9705	228	0.000477262	163	null					1345.55	32	6556	4638	0.00269954	941	null						1157.44	344	7445	30500	0.147583	9791	Hex2HexNAc2dHex1-redEnd	Na	143.237	1157.6	-0.165788	1182.47	14	7163	3170	0.0107242	1096	null
2188.93	11	10163	184	0.000385158	127	Hex5HexNAc3dHex2-redEnd	Na	86.1792	2189.12	0.18864	1361.57	1234	6886	176840	0.102929	32471	Hex3HexNAc2dHex1-redEnd	Na	95.1555	1361.7	0.129561		1171.42	10	6912	851	0.00411782	305	null					1187.49	121	7066	27883	0.0943288	9845	Hex3HexNAc2-redEnd	Na	105.561	1187.61	0.125352
2212.98	5	8707	116	0.000242817	28.4	null					1369.69	14	6700	1979	0.00115187	399	Hex4HexNAc2-redEnd	H	33.7167	1369.73	0.0461813		1173.44	6	6932	523	0.00253069	185	null					1198.5	84	7380	19181	0.0648897	6587	Hex1HexNAc3dHex1-redEnd	Na	106.246	1198.63	0.127337
2218.95	4	8661	97.1	0.000203255	24.8	Hex6HexNAc3dHex1-redEnd	Na	82.1132	0.221913	-2218.73	1391.6	252	6964	37046	0.0215626	6821	Hex4HexNAc2-redEnd	Na	79.136	1391.71	0.110126		1182.43	16	6794	1342	0.00649367	500	null					1303.55	5	6767	1074	0.00363336	190	null
2265.02	8	10145	118	0.000247004	86.2	null					1402.65	15	6607	2154	0.00125373	449	Hex2HexNAc3dHex1-redEnd	Na	59.2525	1402.73	0.0831104		1187.44	170	7619	14365	0.0695094	4704	Hex3HexNAc2-redEnd	Na	149.357	1187.61	-0.177352	1350.55	5	6906	1044	0.00353187	189	Hex1HexNAc3dHex2-redEnd	H	135.945	1350.74	0.183601
2393.01	38	10551	489	0.0010236	369	Hex6HexNAc3dHex2-redEnd	Na	86.6748	2393.22	0.207414	1432.67	14	6777	2044	0.00118971	429	Hex3HexNAc3-redEnd	Na	46.5389	1432.74	0.066675		1198.45	158	7614	13067	0.0632286	4350	Hex1HexNAc3dHex1-redEnd	Na	148.806	1198.63	-0.178337	1361.57	4	6923	830	0.00280791	151	Hex3HexNAc2dHex1-redEnd	Na	97.3591	1361.7	0.132561
2409.09	4	8706	82.4	0.000172484	23.9	null					1475.74	11	6784	1692	0.000984826	361	Hex1HexNAc2dHex4-redEnd	Na	24.1512	1475.77	0.0356408		1228.49	7	6078	314	0.00151938	65.9	Hex2HexNAc3-redEnd	Na	125.277	1228.64	-0.153901	1372.58	7	8081	1475	0.00498996	586	Hex1HexNAc3dHex2-redEnd	Na	101.667	1372.72	0.139546
2892.25	16	11556	380	0.000795436	350	Hex7HexNAc5dHex1-redEnd	H	-260.116	2891.5	-0.752321	1479.83	9	6978	1362	0.00079275	284	null						1269.53	6	5980	251	0.00121454	55.2	Hex1HexNAc4-redEnd	Na	110.632	1269.67	-0.140451	1402.59	6	7043	1380	0.00466857	250	Hex2HexNAc3dHex1-redEnd	Na	101.32	1402.73	0.14211
2907.28	279	11411	6436	0.0134722	6056	Hex1HexNAc5dHex8-redEnd	Na	7.96088	2907.51	0.231445	1529.84	4	7258	4035	0.00234857	810	null						1289.52	10	6496	432	0.00209036	82.5	null					1535.64	12	8651	3134	0.0106024	1430	Hex3HexNAc2dHex2-redEnd	Na	96.878	1535.79	0.14877
											1537.85	9	6922	1373	0.000799153	305	null						1303.53	19	7931	1302	0.00630012	481	null					1554.64	8	8704	2032	0.0068743	943	Hex2HexNAc3dHex2-redEnd	H	129.532	1554.84	0.201375
											1549.78	21	6944	3328	0.00193706	720	null						1309.54	4	5608	194	0.000938728	47.9	Hex2HexNAc2dHex2-redEnd	H	132.911	1309.71	-0.174052	1592.65	5	7507	1244	0.00420848	241	null
											1565.8	1147	7397	181914	0.105883	35470	Hex4HexNAc2dHex1-redEnd	Na	1.49117	1565.8	0.00233488		1350.56	9	6608	385	0.00186294	78.8	Hex1HexNAc3dHex2-redEnd	H	129.28	1350.74	-0.174601	1606.67	19	8899	4801	0.0162419	2330	Hex3HexNAc3dHex1-redEnd	Na	99.5126	1606.83	0.159884
											1595.84	11	7101	1695	0.000986572	375	Hex5HexNAc2-redEnd	Na	-16.9819	1595.81	-0.0271004		1361.59	8	6637	346	0.00167423	69.2	Hex3HexNAc2dHex1-redEnd	Na	84.8724	1361.7	-0.115561	1758.71	9	9157	2158	0.00730056	1218	Hex3HexNAc3dHex2-redEnd	H	126.313	1758.94	0.222148
											1600.91	8	7380	1297	0.000754917	272	null						1372.6	12	7891	660	0.00319361	269	Hex1HexNAc3dHex2-redEnd	Na	87.8229	1372.72	-0.120546	1764.72	35	8997	8815	0.0298213	5104	null
											1606.88	11	7083	1825	0.00106224	407	Hex3HexNAc3dHex1-redEnd	Na	-28.0769	1606.83	-0.045116		1391.61	6	6697	279	0.00135003	56.8	Hex4HexNAc2-redEnd	Na	71.9495	1391.71	-0.100126	1766.73	20	8749	5018	0.016976	3017	null
											1636.87	62	7529	10019	0.00583154	1995	Hex4HexNAc3-redEnd	Na	-20.4972	1636.84	-0.0335513		1402.63	11	8108	586	0.00283554	241	Hex2HexNAc3dHex1-redEnd	Na	72.7993	1402.73	-0.10211	1780.74	209	9027	52500	0.177609	30830	Hex3HexNAc3dHex2-redEnd	Na	97.7641	1780.92	0.174093
											1685	27	7655	4387	0.00255345	897	null						1432.66	11	8344	552	0.00267102	229	Hex3HexNAc3-redEnd	Na	57.0094	1432.74	-0.081675	1821.76	12	9391	2921	0.0098818	1729	Hex2HexNAc4dHex2-redEnd	Na	102.452	1821.95	0.186642
											1704.93	14	7551	2220	0.00129215	482	null						1443.69	4	6766	169	0.000817758	35.8	Hex1HexNAc4dHex1-redEnd	Na	47.5584	1443.76	-0.0686595	1862.77	4	8104	987	0.00333904	202	Hex1HexNAc5dHex2-redEnd	Na	106.933	1862.97	0.199191
											1720.96	640	7765	105270	0.0612722	21371	Hex1HexNAc3dHex4-redEnd	Na	-34.3044	1720.9	-0.0590365		1463.7	6	6850	269	0.00130164	54.2	null					2215.91	4	8842	297	0.00100476	68.3	null
											1742.03	13	7737	2096	0.00121997	448	null						1477.73	5	6803	205	0.000991955	42.6	null					2229.91	14	10440	878	0.00297029	609	Hex4HexNAc4dHex2-redEnd	Na	103.676	2230.15	0.231189
											1751.01	5	7467	905	0.000526754	220	Hex2HexNAc3dHex3-redEnd	Na	-57.9504	1750.91	-0.101472		1514.76	13	8664	554	0.0026807	246	Hex1HexNAc5-redEnd	Na	22.9563	1514.79	-0.0347732	2387.96	14	9138	1006	0.00340332	236	null
											1786.07	8	7768	1251	0.000728143	274	null						1519.76	4	6864	176	0.000851629	38.7	null					2389.97	31	9184	2274	0.00769299	541	Hex9HexNAc2-redEnd	H	108.39	2390.23	0.259049
											1805.07	10	7769	1714	0.000997631	386	null						1535.77	23	8819	931	0.00450493	417	Hex3HexNAc2dHex2-redEnd	Na	13.5243	1535.79	-0.0207702	2403.99	178	10613	10069	0.0340636	7604	Hex4HexNAc4dHex3-redEnd	Na	999.995	2404.23	0.240398
											1811.02	6	7582	914	0.000531992	210	Hex4HexNAc3dHex1-redEnd	Na	-47.1241	1810.93	-0.0853424		1554.78	23	8667	864	0.00418073	403	Hex2HexNAc3dHex2-redEnd	H	35.6157	1554.84	-0.0553747	2429.99	4	9180	260	0.000879585	69.4	null
											1869.11	4	7920	740	0.000430716	167	null						1576.82	7	8578	264	0.00127744	128	Hex2HexNAc3dHex2-redEnd	Na	-1.06588	1576.82	0.0016807	2445.01	37	10907	2038	0.0068946	1534	Hex3HexNAc5dHex3-redEnd	Na	1010	2445.26	0.246947
											1910.13	4	7759	734	0.000427224	176	null						1590.81	8	8714	274	0.00132583	133	null					2475.02	4	9365	266	0.000899884	64.5	Hex4HexNAc5dHex2-redEnd	Na	101.62	2475.27	0.251512
											1924.13	5	8044	886	0.000515695	203	null						1592.83	9	8999	302	0.00146132	142	null					2486.03	9	11022	491	0.00166106	375	Hex2HexNAc6dHex3-redEnd	Na	102.37	2486.29	0.254496
											1938.14	6	8140	922	0.000536649	212	null						1606.85	78	9121	2656	0.0128519	1258	Hex3HexNAc3dHex1-redEnd	Na	-10.0296	1606.83	0.016116	2837.16	5	9940	64.7	0.000218881	17.1	null
											1959.18	5	7365	789	0.000459236	218	null						1612.9	7	7405	293	0.00141777	59.9	null					2839.16	12	9966	154	0.000520985	41	Hex10HexNAc3-redEnd	H	103.955	2839.46	0.295146
											1990.13	6	8107	990	0.000576228	237	null						1647.89	4	7421	154	0.000745176	32.3	Hex2HexNAc4dHex1-redEnd	Na	-22.7969	1647.86	0.0375669	2853.18	29	11666	373	0.00126187	333	Hex1HexNAc7dHex5-redEnd	H	115.492	2853.51	0.329519
											2009.12	12	8323	1886	0.00109774	431	null						1649.9	4	7387	173	0.000837113	36.5	Hex1HexNAc2dHex5-redEnd	Na	-24.3349	1649.86	0.0401502	2894.2	9	11298	71.8	0.000242901	67.7	Hex4HexNAc6dHex3-redEnd	Na	98.4878	2894.49	0.285044
											2015.07	8	7949	1329	0.000773542	319	Hex5HexNAc3dHex1-redEnd	Na	-18.6439	2015.03	-0.0375688		1758.96	56	9315	1462	0.00707433	812	Hex3HexNAc3dHex2-redEnd	H	-11.2861	1758.94	0.0198517	3013.24	9	10306	100	0.000338302	27.9	Hex10HexNAc3dHex1-redEnd	H	102.333	3013.55	0.308355
											2061.14	4	8319	627	0.000364944	151	null						1764.96	173	9388	4454	0.021552	2472	null					3027.26	40	11953	258	0.000872819	248	Hex1HexNAc7dHex6-redEnd	H	1122.23	3027.6	0.339728
											2164.13	28	8565	4351	0.00253249	1059	null						1766.97	72	8687	1861	0.00900501	1124	null					3068.28	7	11017	43.5	0.000147161	46.5	Hex4HexNAc6dHex4-redEnd	Na	95.9014	3068.58	0.294253
											2198.13	4	8580	658	0.000382988	164	null						1780.99	1955	9487	49232	0.238224	27505	Hex3HexNAc3dHex2-redEnd	Na	-38.6904	1780.92	0.0689071	3084.27	6	10379	66	0.000223279	18.5	Hex10HexNAc4-redEnd	H	101.959	3084.58	0.314468
											2205.14	6	8563	900	0.000523844	226	null						1805.99	13	8786	312	0.00150971	194	null					3098.29	26	12058	161	0.000544666	160	Hex1HexNAc8dHex5-redEnd	H	111.623	3098.64	0.345841
											2213.09	10	8688	1539	0.000895773	378	null						1811	10	9590	250	0.0012097	143	Hex4HexNAc3dHex1-redEnd	Na	-40.4982	1810.93	0.0733424	3111.32	4	10198	36.8	0.000124495	10.6	Hex2HexNAc5dHex8-redEnd	Na	93.2783	3111.61	0.290218
											2235.11	7	8713	1041	0.000605912	256	null						1822.01	94	9647	2251	0.0108921	1296	Hex2HexNAc4dHex2-redEnd	Na	-37.5178	1821.95	0.068358	3139.31	5	10417	48.8	0.000165091	14.1	Hex4HexNAc7dHex3-redEnd	Na	96.6347	3139.61	0.303366
											2265.09	21	8825	3259	0.0018969	793	null						1852.03	12	9647	277	0.00134035	165	Hex3HexNAc4dHex1-redEnd	Na	-38.2248	1851.96	0.0707933	3461.44	12	12533	53.2	0.000179977	61.8	null
											2358.06	4	8622	555	0.000323037	149	null						1863.04	39	9775	896	0.00433557	533	Hex1HexNAc5dHex2-redEnd	Na	-34.7867	1862.97	0.0648089	3476.46	41	12878	182	0.00061571	206	Hex2HexNAc8dHex6-redEnd	H	105.804	3476.83	0.367824
											2367.06	4	8470	578	0.000336424	168	null						1882.03	4	8041	147	0.000711304	32.2	Hex4HexNAc4-redEnd	Na	-35.1899	1881.97	0.0662286
											2389.06	4	8526	564	0.000328275	164	null						1963.04	14	9620	285	0.00137906	183	Hex4HexNAc3dHex2-redEnd	H	-1.05861	1963.04	0.0020781
											2392.99	12	8957	1791	0.00104245	464	Hex6HexNAc3dHex2-redEnd	Na	96.705	2393.22	0.231414		2012.06	5	8357	199	0.000962922	44.5	null
											2409.07	13	9016	1902	0.00110706	491	null						2026.06	29	10192	581	0.00281134	365	Hex3HexNAc4dHex2-redEnd	Na	-8.18551	2026.05	0.0165844
											2417.03	9	9004	1289	0.00075026	333	Hex1HexNAc3dHex8-redEnd	Na	92.5926	2417.25	0.223799		2056.06	9	9947	170	0.000822596	112	Hex4HexNAc4dHex1-redEnd	Na	-3.41413	2056.06	0.00701967
											2439.04	10	9104	1397	0.000813122	359	null						2109.11	6	9855	118	0.000570979	80.2	Hex2HexNAc1dHex8-redEnd	H	2.36252	2109.12	-0.00498283
											2544.97	4	8926	577	0.000335842	157	Hex6HexNAc3dHex3-redEnd	H	140.936	2545.33	0.358678		2216.03	8	8738	319	0.00154358	75.3	null
											2680.96	4	8904	570	0.000331768	167	Hex4HexNAc3dHex6-redEnd	Na	155.057	2681.38	0.415702		2230.03	57	10690	1028	0.00497429	696	Hex4HexNAc4dHex2-redEnd	Na	52.1021	2230.15	-0.116189
											2718.95	14	9674	1760	0.00102441	468	Hex6HexNAc3dHex4-redEnd	H	170.245	2719.41	0.462887		2271.03	12	11197	212	0.00102583	140	Hex3HexNAc5dHex2-redEnd	Na	63.7326	2271.17	-0.144738
											2732.97	6	9266	735	0.000427806	204	Hex1HexNAc5dHex7-redEnd	Na	162.547	2733.42	0.444236		2387.96	7	9122	839	0.00405976	198	null
											2787.04	7	9656	795	0.000462729	221	null						2389.97	46	9163	1847	0.00893727	433	Hex9HexNAc2-redEnd	H	110.064	2390.23	-0.263049
											2851.02	14	9863	1552	0.000903339	425	Hex8HexNAc4dHex1-redEnd	H	-191.465	2850.47	-0.54587		2403.97	939	10972	15935	0.0771063	11639	Hex4HexNAc4dHex3-redEnd	Na	107.904	2404.23	-0.259398
											2871.1	15	9873	1707	0.000993557	476	Hex4HexNAc6dHex3-redEnd	H	490.439	2872.51	1.4081		2429.96	18	10174	303	0.00146616	242	null
											2891.04	8	9416	901	0.000524426	263	Hex7HexNAc5dHex1-redEnd	H	160.385	2891.5	0.463679		2432.93	7	9245	125	0.00060485	130	Hex7HexNAc1dHex4-redEnd	H	136.878	2433.26	-0.333015
											2907.05	627	10009	68313	0.0397615	18687	Hex1HexNAc5dHex8-redEnd	Na	155.981	2907.51	0.453445		2444.97	179	11100	2983	0.0144341	2206	Hex3HexNAc5dHex3-redEnd	Na	119.816	2445.26	-0.292947
											2937.09	8	9584	858	0.000499398	261	Hex2HexNAc5dHex7-redEnd	Na	144.364	2937.52	0.424009		2474.96	29	10952	470	0.00227424	359	Hex4HexNAc5dHex2-redEnd	Na	127.078	2475.27	-0.314512
																							2485.96	50	11085	818	0.00395814	621	Hex2HexNAc6dHex3-redEnd	Na	130.129	2486.29	-0.323496
																							2515.95	6	11065	101	0.000488719	78.1	Hex3HexNAc6dHex2-redEnd	Na	137.149	2516.3	-0.345061
																							2526.96	24	11163	381	0.00184358	294	Hex1HexNAc7dHex3-redEnd	Na	140.107	2527.31	-0.354046
																							2648.94	14	11193	203	0.000982277	168	Hex4HexNAc5dHex3-redEnd	Na	159.959	2649.36	-0.423721
																							2838.98	8	9867	284	0.00137422	77.1	Hex10HexNAc3-redEnd	H	167.717	2839.46	-0.476146
																							2853	72	11809	917	0.00443718	808	Hex1HexNAc7dHex5-redEnd	H	179.292	2853.51	-0.511519
																							2894.04	15	11545	188	0.000909695	174	Hex4HexNAc6dHex3-redEnd	Na	155.162	2894.49	-0.449044
																							3013.15	5	9917	159	0.00076937	46.4	Hex10HexNAc3dHex1-redEnd	H	130.878	3013.55	-0.394355
																							3027.19	51	12043	561	0.00271457	535	Hex1HexNAc7dHex6-redEnd	H	136.01	3027.6	-0.411728
																							3068.26	10	11643	108	0.000522591	109	Hex4HexNAc6dHex4-redEnd	Na	102.42	3068.58	-0.314253
																							3084.28	5	10294	182	0.000880662	52.2	null
																							3098.32	54	12217	567	0.0027436	556	Hex1HexNAc8dHex5-redEnd	H	103.876	3098.64	-0.321841
																							3139.41	13	12191	138	0.000667755	139	Hex4HexNAc7dHex3-redEnd	Na	66.0527	3139.61	-0.207366
																							3302.86	7	12181	62.7	0.000303393	69.2	Hex2HexNAc8dHex5-redEnd	H	-38.568	3302.74	0.127385
																							3462.5	16	12358	141	0.000682271	166	Hex5HexNAc9dHex1-redEnd	H	37.7595	3463.81	-1.30742
																							3477.58	90	12873	783	0.00378878	889	null
