# Supplementary material for: Major human schistosome species express different glycans with immunological and diagnostic implications.
Source: Research Square preprint supplement (doi:10.21203/rs.3.rs-7103573/v1), 2025-07-30
Supplement: Supplementary file 8 [file f9a4586e8b1cb9dc500413b0.xlsx]

## Sheet: MFIs - mAbs
Fraction ID	Fraction Name	Anti-LDN (273-3F2-A)	Anti-LeX (291-4D10)	Anti F-LDN(-F) (291-5D5)	Anti-M3/5 (100-4G11)
1	Blk1	0	14	1742.33	81
2	Blk2	7.66667	0	0	0
3	Blk3	56.8333	872.833	0	0
4	Blk4	0	425	64.3333	0
5	Blk5	50.6667	0	240.333	0
6	Blk6	0	0	0	0
7	Blk7	0	0	0	0
8	Blk8	73.3333	389	0	0
9	Blk9	0	0	0	0
10	Crude Ag ShCA	1110	315.333	12015.3	565
11	Crude Ag ShSEA	12258	62353	5959.33	841.667
12	Crude Ag SmCA	785.333	8203.33	38546.5	682
13	Crude Ag SmSEA	1229	62608.7	64862.3	0
14	NG-1_2uM_x000D_	161.333	392	45.6667	0
15	NG-1_20uM_x000D_	381.333	1478	319	107.333
24	NG-2_2uM_x000D_	193.667	54.3333	22.3333	0
25	NG-2_20uM_x000D_	645	1308	416.667	417.667
26	NG-3_2uM_x000D_	515.667	1269	231.333	0
27	NG-3_20uM_x000D_	1008.67	2170.67	1017.67	523
28	NG-4_2uM_x000D_	4634	0	0	0
29	NG-4_20uM_x000D_	30547	716	723.667	0
30	NG-5_2uM_x000D_	130.333	0	21142.7	0
31	NG-5_10uM_x000D_	520.667	1571.33	64967	0
32	NG-7_2uM_x000D_	226.667	141	425	0
33	NG-7_10uM_x000D_	122	239	5348.67	0
34	NG-8_2uM_x000D_	157.667	58514.3	1465	0
35	NG-8_6uM_x000D_	6088.33	62610.7	25476.7	0
36	NG-9_2uM_x000D_	197.333	1059.33	1635	0
16	NG-10_2uM_x000D_	0	0	2593	0
17	NG-10_10uM_x000D_	415.667	190.667	14688.3	36
18	NG-11_2uM_x000D_	154.667	509	38946.7	0
19	NG-11_10uM_x000D_	459.667	1730.33	64965.3	0
20	NG-12_2uM_x000D_	261	1527	64869.3	6.33333
21	NG-13_2uM_x000D_	25.3333	0	0	0
22	NG-13_20uM_x000D_	0	134.667	5133	0
23	NG-15_2uM_x000D_	247.333	22252.3	49836	0
37	NG-A1_2uM	262	812.333	49054.7	0
38	NG-A2_2uM	39.6667	5738.67	62613	0
39	NG-A3_2uM	81.6667	3589.33	39394.3	0
40	Oglyc_CA1_0.08uM	0	168.667	64958.7	0
41	Oglyc_CA2_0.602uM	53	2635	64879	0
42	Oglyc_CA3_1.04uM	154.667	423.333	49132.3	0
43	Oglyc_SEA_1_0.18uM	1024.83	58575.3	55235.5	0
44	Oglyc_SEA2_0.102uM	0	3516	18927.3	0
45	Shc_F07_02uM	0	0	422.333	0
46	Shc_F08_02uM	51.6667	53245	1111.33	0
47	Shc_F09_02uM	81.6667	900.667	285.667	0
48	Shc_F10_02uM	134	589.667	95	0
49	Shc_F11_02uM	12.3333	0	85.5	0
50	Shc_F12_02uM	10.3333	580	0	0
51	Shc_F12_06uM	177.333	0	306.5	0
52	Shc_F01_02uM	479.333	1272.33	326	5.33333
53	Shc_F02_02uM	0	0	0	0
54	Shc_F02_06uM	324	4367.67	13078.3	0
55	Shc_F03_02uM	0	0	40985	0
56	Shc_F03_06uM	165.667	486.667	64942.7	0
57	Shc_F04_02uM	0	0	25134	0
58	Shc_F05_02uM	217.333	1599.33	1692.33	0
59	Shc_F05_06uM	272.333	834.667	12964	0
60	Shc_F06_02uM	57.3333	666	93	0
61	She_HFa_F01_02uM	138.667	602.333	200.333	0
62	She_HFa_F02_02uM	160.667	740	48	0
63	She_HFa_F02_06uM	572	0	3.33333	0
64	She_HFa_F02_10uM	1091	689.333	0	0
65	She_HFa_F03_02uM	126.667	837.667	0	0
66	She_HFa_F03_06uM	498.333	684	444.333	0
67	She_HFa_F04_02uM	90	266.333	4.33333	0
68	She_HFa_F04_06uM	444	391.667	433.333	0
69	She_HFa_F04_10uM	922.333	648.667	328	0
70	She_HFa_F05_02uM	88.6667	859.667	0	0
71	She_HFa_F06_02uM	95	193	2.33333	0
72	She_HFa_F06_06uM	1652	463	3258.33	0
73	She_HFa_F06_10uM	9655.33	575.333	11195.3	0
74	She_HFa_F06_20uM	20470.7	553.333	30219.3	0
75	She_HFa_F07_02uM	188	506.333	504.333	0
76	She_HFa_F08_02uM	223.333	738	702.333	0
77	She_HFn_F03_02uM	155.333	1171.67	129.667	0
78	She_HFn_F04_02uM	76	667.667	2312	0
79	She_HFn_F05_02uM	741.333	691.667	0	0
80	She_HFn_F05_06uM	7254.67	1023.67	13720.7	0
81	She_HFn_F06_02uM	154.833	850.333	59	0
82	She_HFn_F06_06uM	1712.67	802.333	1798	0
83	She_HFn_F07_02uM	1413	1049.33	1745.67	0
84	She_HFn_F08_02uM	914.667	1016	236	0
85	She_HFn_F08_06uM	16265	649.333	18289.3	0
86	She_HFn_F09_02uM	151.333	540	138	0
87	She_HFn_F10_02uM	2668	811.333	671	0
88	She_HFn_F11_02uM	120.333	0	29.6667	0
89	She_HFn_F12_02uM	8539	201.333	567.5	0
90	She_HFn_F12_06uM	3200.67	4257.67	2267.33	0
91	She_HFn_F12_10uM	45338.3	345.833	34371.5	0
92	She_HFn_F13_02uM	146.667	1066.67	184.667	0
93	She_HFn_F01_02uM	85	720	0	0
94	She_HFn_F02_02uM	624	373	30	0
95	She_HF_F01_02uM	69.3333	181.333	0	0
96	She_HF_F01_06uM	107	647.333	40.3333	0
97	She_HF_F02_02uM	144.667	624.333	34.3333	0
98	She_HF_F03_02uM	164	688	0	0
99	She_A_F03_02uM	257.333	1216.83	151.5	0
100	She_A_F03_06uM	165	1331.67	108	0
101	She_A_F03_10uM	88.6667	1150.33	43.3333	0
102	She_A_F04_02uM	27.3333	92.6667	170	0
103	She_A_F04_06uM	89.3333	692.333	22.3333	0
104	She_A_F04_10uM	189.333	0	173	4
105	She_A_F04_20uM	54.6667	1861.67	0	0
106	She_A_F04_60uM	802.333	5526.67	12.3333	0
107	She_A_F05_02uM	17.3333	195	0	0
108	She_A_F05_06uM	99.6667	845.667	31.3333	0
109	She_A_F05_10uM	23	922.667	46.3333	0
110	She_A_F05_20uM	152.333	2945.33	0	0
111	She_A_F05_60uM	4343	4985	0	0
112	She_A_F06_02uM	114.667	78.6667	0	0
113	She_A_F06_06uM	1616.33	39	18.3333	0
114	She_A_F06_10uM	6593.33	730.667	0	0
115	She_A_F06_20uM	6577	448.667	0	0
116	She_A_F06_60uM	11233.7	943.667	0	0
117	She_A_F07_02uM	187.833	868.333	12	0
118	She_A_F07_06uM	5963.67	1086	0	0
119	She_A_F07_10uM	11439.3	861.667	124.667	0
120	She_A_F07_20uM	14674.3	883.333	111.333	0
121	She_A_F01_02uM	127	748.667	14.3333	0
122	She_A_F02_02uM	87.6667	507.333	14.3333	0
123	She_A_F02_06uM	509.333	8.66667	389.333	0
124	She_A_F02_10uM	1439.67	0	51.3333	0
125	She_N_F07_02uM	2431	653.667	94.6667	0
126	She_N_F07_06uM	16365.7	0	922.333	0
127	She_N_F07_10uM	64894.3	1424.67	4563.33	0
128	She_N_F07_20uM	64749.7	2274	3665	0
129	She_N_F08_02uM	4530.33	1062	258.667	0
130	She_N_F08_06uM	64876	2308.67	2837.33	0
131	She_N_F08_10uM	61762.7	2342.33	7107.67	0
132	She_N_F09_02uM	139	1116.33	19.6667	0
133	She_N_F09_06uM	313	495	0	0
134	She_N_F09_10uM	3739.67	639	0	0
135	She_N_F09_20uM	28458	1447.67	175.333	0
136	She_N_F10_02uM	90	0	36	0
137	She_N_F10_06uM	74.3333	217	1.33333	0
138	She_N_F10_10uM	135	348	16	0
139	She_N_F10_20uM	127.333	390.333	0	0
140	She_N_F10_60uM	2149.83	927.333	0	0
141	She_N_F11_02uM	53.3333	145.333	0	0
142	She_N_F11_06uM	553	353	0	0
143	She_N_F11_10uM	10891.3	797	44	0
144	She_N_F11_20uM	40177	920.667	30.6667	0
145	She_N_F11_60uM	64832	1375	240.333	0
146	She_N_F12_02uM	124	471.667	0	0
147	She_N_F13_02uM	5945.67	4969	40	0
148	She_N_F13_06uM	58484.3	1230	299.333	0
149	She_N_F13_10uM	64921.3	590.333	277	0
150	She_N_F14_02uM	117.333	1335.67	1	0
151	She_N_F15_02uM	56604.3	579	1396	0
152	She_N_F15_06uM	64475.7	1551	5030	0
153	She_N_F01_02uM	17.6667	159.667	0	0
154	She_N_F01_06uM	0	0	8	0
155	She_N_F01_10uM	4028.67	440	104.333	0
156	She_N_F02_02uM	65.6667	762.333	3011	0
157	She_N_F03_02uM	0	0	93.5	0
158	She_N_F04_02uM	6110.67	240.333	47.6667	0
159	She_N_F04_06uM	13680.7	1298.33	1967.67	0
160	She_N_F04_10uM	53021	949.333	12204.7	0
161	She_N_F05_02uM	70.3333	0	53.5	0
162	She_N_F05_06uM	27095.7	1284.67	13878	0
163	She_N_F06_02uM	484	1347.33	184.667	0
164	She_UN_F01_02uM	127	1044.67	0	0
165	She_UN_F02_02uM	0	0	2	0
166	She_A_F08_06uM	241.333	2077	47	0
167	She_A_F08_10uM	639.667	2420.67	75	0
168	She_A_F08_20uM	3554	1640.67	0	0
169	She_A_F08_60uM	11010.3	1362	12.6667	0
170	Shw_F01_2uM	61	0	0	0
171	Shw_F02_2uM	65.6667	95.3333	0	0
172	Shw_F03_2uM	52	0	48476	0
173	Smc_F01_02uM	36.3333	62521.3	1223.67	0
174	Smc_F02_02uM	107.333	26493.3	52823	0
175	Smc_F03_02uM	47.3333	58514	62590.7	0
176	Smc_F04_02uM	72.6667	62620	64982.7	0
177	Smc_F05_02uM	41	50016	62531.3	0
178	Smc_F06_02uM	60.3333	18564.7	64990.3	10.6667
179	Smc_F07_02uM	68.3333	3969	64979.7	0
180	Smc_F07_06uM	50	3688	64637.3	0
181	Smc_F08_02uM	78	1132.67	64982.7	0
182	Smc_F08_06uM	0	1726.33	64966.3	0
183	Smc_F09_02uM	0	89.3333	64647.3	0
184	Smc_F10_02uM	0	0	64966.7	0
185	Sme_HFa_F01_02uM	103.667	0	2	0
186	Sme_HFa_F01_06uM	338.333	95.6667	171.333	0
187	Sme_HFa_F01_10uM	308.333	629	228	0
188	Sme_HFn_F01_02uM	0	0	0	0
189	Sme_HFn_F01_20uM	25.3333	0	0	0
190	Sme_HFn_F02_02uM	8096.67	0	3801.67	0
191	Sme_HFn_F02_06uM	64323.3	220.333	49058	0
192	Sme_HFn_F02_10uM	64825.3	308	64965.7	0
193	Sme_HFn_F03_02uM	362.667	0	7028.67	0
194	Sme_HFn_F04_02uM	2538.67	0	148.667	0
195	Sme_HFn_F04_06uM	35911.8	0	14773.5	0
196	Sme_HFn_F04_10uM	1962.33	73	12060	0
197	Sme_HFn_F05_02uM	53685.7	72.6667	41420.3	0
198	Sme_HFn_F06_02uM	7135.33	104.667	8172	0
199	Sme_HFn_F07_02uM	9734	0	16836.7	0
200	Sme_HFn_F08_02uM	1834.67	0	542.333	0
201	Sme_HFn_F09_02uM	67	0	0	0
202	Sme_HFn_F09_06uM	485	65	1300.33	0
203	Sme_HFn_F10_02uM	18652.3	167.333	17880.3	0
204	Sme_HFn_F10_06uM	0	0	87.3333	0
205	Sme_HFn_F11_02uM	265	155.333	1787.67	0
206	Sme_A_F01_02uM	105.667	611	64962.3	0
207	Sme_A_F02_02uM	61.3333	0	43729.3	0
208	Sme_A_F02_06uM	88.6667	358.333	63600.3	0
209	Sme_A_F03_02uM	32	0	1362.67	0
210	Sme_A_F03_06uM	92.3333	0	63614	0
211	Sme_A_F03_10uM	80	0	64148	0
212	Sme_A_F04_02uM	66.6667	0	39.3333	0
213	Sme_A_F04_06uM	0	36.6667	2222.33	0
214	Sme_A_F04_10uM	59.8333	0	49923.5	0
215	Sme_A_F04_20uM	79.6667	0	64971.7	0
216	Sme_A_F05_02uM	24	0	62309.7	0
217	Sme_A_F05_06uM	0	0	64938.7	0
218	Sme_A_F05_10uM	66	19.3333	64913	0
219	Sme_A_F06_02uM	12.3333	0	64955	0
220	Sme_A_F06_20uM	80	210	2262	0
221	Sme_A_F07_02uM	59	246.333	3692.67	0
222	Sme_A_F07_06uM	97.3333	0	24158.7	0
223	Sme_A_F08_02uM	0	0	64785.3	0
224	Sme_A_F09_02uM	97.3333	0	5438.67	0
225	Sme_A_F09_06uM	0	0	53761.7	0
226	Sme_A_F10_02uM	14.3333	0	1372	0
227	Sme_A_F10_06uM	0	0	48458.3	0
228	Sme_A_F10_10uM	23	0	47465.3	0
229	Sme_A_F11_02uM	4	201.667	57777	0
230	Sme_N_F01_02uM	38	89.6667	107	0
231	Sme_N_F02_02uM	63	62594.3	2933.33	0
232	Sme_N_F02_06uM	129	62620.7	19900	0
233	Sme_N_F03_02uM	21.6667	22099	64863.7	0
234	Sme_N_F03_06uM	64.6667	62536.3	64950	0
235	Sme_N_F04_02uM	67.6667	142	55809.7	0
236	Sme_N_F04_10uM	86	386.667	64963	0
237	Sme_N_F05_02uM	10.3333	0	0	0
238	Sme_N_F05_60uM	57.6667	1720.67	64972	0
239	Sme_N_F06_02uM	20.8333	35.3333	64917.5	0
240	Sme_N_F06_06uM	95.3333	777.667	64968.7	0
241	Sme_N_F06_10uM	70.6667	0	64943.3	0
242	Sme_N_F06_20uM	4.66667	131.333	64916	0
243	Sme_N_F07_02uM	8.66667	0	64882.3	0
244	Sme_N_F07_06uM	32.3333	0	64929	0
245	Sme_N_F07_10uM	101	495.667	64972.7	0
246	Sme_N_F07_20uM	68.6667	1392	64976	0
247	Sme_N_F07_60uM	0	0	59703.3	0
248	Sme_N_F08_02uM	46	0	64976	0
249	Sme_N_F08_06uM	43.3333	0	64955	0
250	Sme_N_F08_10uM	0	0	64959.3	0
251	Sme_N_F09_02uM	27.3333	0	64933.7	0
252	Sme_N_F09_06uM	0	0	64965.3	0
253	Sme_N_F09_10uM	22.3333	0	62658.3	20.3333
254	Sme_N_F10_02uM	132.333	472	63325	0
255	Sme_N_F10_06uM	93.3333	959.333	64959.3	0
256	Sme_N_F11_02uM	80	481.667	48015.3	0
257	Sme_N_F12_02uM	140.667	448.667	3493.67	0
258	Sme_N_F13_02uM	128	2286.67	38238	0
259	Sme_N_F13_10uM	145.667	61190.7	64969.7	0
260	Sme_N_F14_02uM	61.3333	0	60007.3	0
261	Sme_N_F14_10uM	132.333	147.667	64982	0
262	Sme_N_F15_02uM	0	0	24.5	0
263	Sme_N_F16_02uM	0	88.3333	39257.3	0
264	Sme_N_F16_10uM	82	268.333	64982.3	0
265	Sme_N_F17_02uM	199.667	771	57944	0
266	Sme_N_F17_06uM	53	681.667	64453.3	0
267	Sme_N_F17_10uM	0	623.667	61406	0
268	Sme_N_F17_20uM	35.3333	341.333	64976.7	0
269	Sme_N_F18_02uM	0	0	37015	0
270	Sme_N_F18_06uM	57.3333	0	64382.7	0
271	Sme_N_F18_10uM	0	357.667	64722.7	0
272	Sme_N_F18_20uM	74.3333	0	64964.3	0
273	Sme_N_F19_02uM	21.3333	0	64895	0
274	Sme_N_F19_60uM	148.333	632.333	64958.3	0
275	Sme_N_F20_02uM	5.33333	0	24114.7	0
276	Sme_N_F20_06uM	84.6667	0	63755.3	0
277	Sme_N_F20_10uM	31.6667	719.667	63552.3	0
278	Sme_N_F20_20uM	0	904.833	64952.5	0
279	Sme_N_F21_02uM	0	96	56284.3	0
280	Sme_N_F21_06uM	46.3333	0	64978.3	0
281	Sme_N_F22_02uM	32.6667	0	64791.3	0
282	Sme_N_F23_02uM	4.33333	0	26774.7	0
283	Sme_N_F23_10uM	0	0	61591	0
284	Sme_N_F24_02uM	82.3333	0	64971.7	0
285	Sme_N_F25_02uM	164	1109.67	60328	0
286	Smw_F01_2uM	60.3333	8	0	0
287	Smw_F02_2uM	63	0	64963.3	0
288	Smw_F03_2uM	65.6667	0	9968.33	0
